# Supplementary material for: An analysis of beak shape variation in two ages of domestic turkeys (Meleagris gallopavo) using landmark-based geometric morphometrics
Source: PLoS One. 2017 Sep 21;12(9):e0185159. doi: 10.1371/journal.pone.0185159 (PMC5608350; doi:10.1371/journal.pone.0185159)
Supplement: S4 Dataset — (XLSX) [file pone.0185159.s004.xlsx]

## Sheet: PoultDorsalSemi.txt
Id	RawCoord1	RawCoord2	RawCoord3	RawCoord4	RawCoord5	RawCoord6	RawCoord7	RawCoord8	RawCoord9	RawCoord10	RawCoord11	RawCoord12	RawCoord13	RawCoord14	RawCoord15	RawCoord16	RawCoord17	RawCoord18	RawCoord19	RawCoord20	RawCoord21	RawCoord22	RawCoord23	RawCoord24	RawCoord25	RawCoord26
98429-4week-1-D.tif	0.34809	-0.0166943	-0.277404	-0.152082	-0.282853	0.183106	0.243076	-0.119954	0.235422	0.102264	0.134021	-0.167583	0.125276	0.156712	0.025592	-0.204792	0.0171247	0.203268	-0.0831442	-0.236934	-0.0913907	0.243212	-0.192037	-0.269111	-0.201774	0.278588
98432-4week-1-D.tif	0.362994	-0.0183541	-0.284023	-0.165783	-0.285539	0.193407	0.250539	-0.114707	0.252713	0.111366	0.13572	-0.158935	0.135002	0.155302	0.0211281	-0.190952	0.0162832	0.183524	-0.0925147	-0.222722	-0.096216	0.225612	-0.205033	-0.258257	-0.211053	0.260499
98433-4week-1-D.tif	0.355	-0.00846692	-0.280434	-0.174505	-0.276369	0.19529	0.247689	-0.117406	0.242838	0.107418	0.134206	-0.163577	0.130905	0.157522	0.0198906	-0.193872	0.0177421	0.191615	-0.09261	-0.227684	-0.091581	0.232625	-0.203946	-0.265204	-0.20333	0.266243
98434-4week-1-D.tif	0.339369	0.00431393	-0.266847	-0.205125	-0.247023	0.219346	0.234779	-0.113524	0.235304	0.121053	0.122811	-0.163591	0.127289	0.163345	0.0104944	-0.199361	0.0213334	0.199997	-0.0979593	-0.243361	-0.0832379	0.236127	-0.206504	-0.28567	-0.189808	0.266452
98438-4week-1-D.tif	0.364871	-0.0120011	-0.278708	-0.191472	-0.283534	0.197069	0.253449	-0.113682	0.249243	0.0990375	0.135843	-0.15394	0.131962	0.144276	0.0198231	-0.1858	0.0166178	0.184901	-0.0938953	-0.220899	-0.0966156	0.228669	-0.209172	-0.248607	-0.209884	0.272449
98439-4week-1-D.tif	0.366272	-0.00507135	-0.292725	-0.157507	-0.285112	0.188761	0.255745	-0.11309	0.248096	0.10079	0.137689	-0.154598	0.133724	0.151741	0.0208958	-0.188472	0.01813	0.18487	-0.0941982	-0.225527	-0.0937299	0.224072	-0.208165	-0.265937	-0.206623	0.259969
98441-4week-1-D.tif	0.34245	-0.00340549	-0.276233	-0.180904	-0.263363	0.185811	0.23434	-0.115972	0.237512	0.119484	0.120919	-0.15806	0.129436	0.166016	0.0119436	-0.198856	0.023182	0.20338	-0.094388	-0.24312	-0.0809261	0.240069	-0.199717	-0.290007	-0.185156	0.275565
98445-4week-1-D.tif	0.357897	0.00452362	-0.293372	-0.180149	-0.280435	0.155174	0.243386	-0.102822	0.249978	0.109443	0.128762	-0.159256	0.141165	0.162796	0.012267	-0.192938	0.0306847	0.20038	-0.102894	-0.226214	-0.0807934	0.229753	-0.21596	-0.267093	-0.190687	0.266402
98447-4week-1-D.tif	0.327657	-0.0230501	-0.253742	-0.166001	-0.261998	0.220351	0.235363	-0.14144	0.220864	0.112789	0.133197	-0.186549	0.115481	0.169844	0.0299372	-0.218375	0.00862647	0.209707	-0.0751934	-0.241646	-0.0967609	0.248946	-0.179266	-0.269159	-0.204166	0.284583
98448-4week-1-D.tif	0.362392	-0.00839599	-0.283935	-0.164679	-0.278085	0.203325	0.253916	-0.119701	0.244841	0.105146	0.135728	-0.15495	0.127836	0.148003	0.0208116	-0.189312	0.0140157	0.185334	-0.0918584	-0.227438	-0.0963233	0.225857	-0.202879	-0.269503	-0.20646	0.266314
98449-4week-1-D.tif	0.315771	-0.0201188	-0.246372	-0.164702	-0.245536	0.230327	0.227369	-0.149513	0.21483	0.127241	0.126116	-0.188896	0.110152	0.177522	0.0273752	-0.227545	0.00759757	0.216419	-0.0749753	-0.250265	-0.0934914	0.252333	-0.17304	-0.288718	-0.195794	0.285917
98457-4week-1-D.tif	0.331144	-0.00719901	-0.258224	-0.184076	-0.253196	0.217795	0.232717	-0.129566	0.227313	0.122201	0.12606	-0.178094	0.119496	0.166769	0.0189522	-0.210403	0.0134428	0.203078	-0.0851978	-0.247261	-0.0904066	0.240697	-0.190164	-0.278921	-0.191938	0.28498
98460-4week-1-D.tif	0.331392	-0.0222096	-0.245858	-0.200341	-0.252293	0.235413	0.232448	-0.127137	0.22507	0.108576	0.129232	-0.178454	0.115521	0.159978	0.0229013	-0.207892	0.00899406	0.205508	-0.082542	-0.237037	-0.0976494	0.246599	-0.18483	-0.27432	-0.202385	0.291316
98461-4week-1-D.tif	0.335379	0.000779871	-0.256362	-0.216293	-0.247907	0.2165	0.233657	-0.120411	0.231274	0.118625	0.122627	-0.16861	0.125219	0.166184	0.0117042	-0.202432	0.0179256	0.200004	-0.0960898	-0.239857	-0.0861557	0.239156	-0.203089	-0.276992	-0.188183	0.283347
98465-4week-1-D.tif	0.375043	-0.0148117	-0.294817	-0.171033	-0.295978	0.170076	0.256809	-0.109668	0.26152	0.107084	0.136857	-0.15139	0.141684	0.150683	0.017419	-0.179611	0.0223163	0.184081	-0.0999167	-0.210584	-0.0955569	0.217006	-0.214741	-0.250869	-0.210639	0.259036
98468-4week-1-D.tif	0.318127	0.00187968	-0.249556	-0.211266	-0.242425	0.201907	0.22359	-0.132871	0.221114	0.131086	0.116268	-0.178368	0.120295	0.177602	0.0126125	-0.217121	0.0192599	0.212425	-0.0909534	-0.250508	-0.0780416	0.254379	-0.194161	-0.283763	-0.176129	0.294619
98469-4week-1-D.tif	0.325222	-0.00507751	-0.243267	-0.230132	-0.244892	0.215501	0.225623	-0.123209	0.228138	0.121931	0.120043	-0.175222	0.124791	0.171424	0.0146831	-0.214291	0.0211575	0.212582	-0.0953737	-0.238147	-0.0851677	0.246385	-0.202195	-0.269251	-0.188762	0.287507
98470-4week-1-D.tif	0.349702	-0.00773486	-0.271765	-0.183272	-0.26504	0.216487	0.246495	-0.122386	0.237697	0.109698	0.133567	-0.165808	0.125816	0.156888	0.0212166	-0.199794	0.0148547	0.194365	-0.0916449	-0.229299	-0.0946345	0.231289	-0.201639	-0.267216	-0.204625	0.266783
98471-4week-1-D.tif	0.347963	-0.00346273	-0.276938	-0.178488	-0.268244	0.195725	0.242678	-0.122632	0.240636	0.118396	0.128672	-0.164293	0.129298	0.160428	0.0147668	-0.191808	0.0201153	0.196968	-0.0915566	-0.242099	-0.0872813	0.234338	-0.203758	-0.270562	-0.196351	0.267488
98472-4week-1-D.tif	0.331895	0.00552888	-0.25556	-0.226638	-0.24381	0.207809	0.229973	-0.119644	0.232477	0.125721	0.11806	-0.167427	0.128336	0.171436	0.00750645	-0.203799	0.023664	0.206447	-0.10158	-0.239574	-0.0801095	0.241122	-0.208321	-0.27983	-0.182531	0.278848
98475-4week-1-D.tif	0.30137	-0.0138279	-0.237901	-0.160838	-0.225473	0.253902	0.218391	-0.1446	0.199764	0.126179	0.124637	-0.200687	0.100576	0.179566	0.0277116	-0.235496	0.00344033	0.220453	-0.0689455	-0.270169	-0.0912348	0.26001	-0.163738	-0.309823	-0.188599	0.29533
98476-4week-1-D.tif	0.361111	-0.00983757	-0.283983	-0.176982	-0.278097	0.192227	0.247582	-0.110074	0.249294	0.108657	0.131049	-0.15379	0.133139	0.151422	0.0159542	-0.187558	0.0209356	0.192854	-0.0966309	-0.225401	-0.0920396	0.224923	-0.206436	-0.272022	-0.201878	0.265582
98479-4week-1-D.tif	0.375444	-0.0150942	-0.296521	-0.15432	-0.298939	0.169398	0.25942	-0.111768	0.256352	0.0979914	0.139048	-0.148279	0.135837	0.141687	0.0211219	-0.180325	0.0200151	0.187722	-0.0947619	-0.215661	-0.0967547	0.222499	-0.208887	-0.258176	-0.211374	0.264326
98480-4week-1-D.tif	0.367972	-0.00660631	-0.283965	-0.198104	-0.279971	0.19372	0.250149	-0.0997735	0.253752	0.099979	0.131447	-0.146778	0.137243	0.146508	0.0139991	-0.182693	0.0209006	0.182254	-0.101876	-0.218106	-0.0919961	0.223951	-0.214236	-0.263075	-0.203421	0.268724
98483-4week-1-D.tif	0.35618	-0.00245375	-0.288637	-0.170213	-0.274435	0.1837	0.243741	-0.107929	0.247219	0.113445	0.128118	-0.154591	0.136098	0.161445	0.014482	-0.194074	0.0248276	0.195785	-0.0980617	-0.233255	-0.0856336	0.226456	-0.208784	-0.278562	-0.195114	0.260247
98487-4week-1-D.tif	0.341987	-0.0223729	-0.262463	-0.161979	-0.259103	0.241784	0.246205	-0.13454	0.228295	0.106362	0.139247	-0.178361	0.119036	0.164278	0.0292125	-0.203989	0.00433692	0.195207	-0.0800151	-0.234101	-0.104647	0.233347	-0.186674	-0.273028	-0.215419	0.267394
98489-4week-1-D.tif	0.353328	-0.014181	-0.277914	-0.179351	-0.281794	0.179429	0.244779	-0.118099	0.24277	0.104927	0.131395	-0.16018	0.13211	0.159757	0.0197746	-0.194762	0.0192338	0.195354	-0.0907072	-0.229032	-0.0900864	0.238242	-0.202154	-0.259444	-0.200735	0.277339
98493-4week-1-D.tif	0.333963	0.0037514	-0.250867	-0.237008	-0.242927	0.219418	0.23045	-0.112276	0.232385	0.116101	0.121104	-0.167235	0.129538	0.16903	0.00836679	-0.200962	0.0215305	0.200946	-0.101647	-0.23805	-0.0831498	0.24073	-0.211075	-0.274901	-0.187671	0.280456
98496-4week-1-D.tif	0.324183	-0.00481526	-0.25636	-0.196292	-0.253294	0.195969	0.229885	-0.136201	0.222436	0.122784	0.123563	-0.181674	0.120582	0.174911	0.0159168	-0.208658	0.0180852	0.213105	-0.0877505	-0.243779	-0.0815695	0.255017	-0.191457	-0.278913	-0.184221	0.288546
98497-4week-1-D.tif	0.338791	-0.00361374	-0.272668	-0.176882	-0.266552	0.189953	0.237318	-0.122131	0.231369	0.112425	0.129659	-0.17562	0.127115	0.168974	0.0184938	-0.203396	0.019731	0.204041	-0.0894203	-0.239148	-0.0850758	0.242777	-0.197317	-0.274895	-0.191443	0.277516
98498-4week-1-D.tif	0.376382	-0.00144909	-0.299624	-0.166434	-0.291538	0.183356	0.256297	-0.0917032	0.257989	0.0958185	0.137631	-0.147669	0.137922	0.134801	0.0171057	-0.179796	0.0223313	0.17841	-0.099306	-0.222908	-0.0918823	0.221573	-0.215862	-0.263832	-0.207444	0.259831
98502-4week-1-D.tif	0.345307	-0.00690255	-0.272757	-0.19167	-0.275146	0.173152	0.24062	-0.123065	0.238367	0.110991	0.129351	-0.169502	0.131135	0.165029	0.0175198	-0.199237	0.0219099	0.202608	-0.0930618	-0.228589	-0.0854099	0.243875	-0.203748	-0.257974	-0.194087	0.281285
98504-4week-1-D.tif	0.346677	-0.00500829	-0.27524	-0.188293	-0.267997	0.187627	0.237555	-0.115045	0.24215	0.118661	0.124849	-0.162062	0.132621	0.165247	0.0133529	-0.197408	0.0222028	0.19713	-0.0956428	-0.235772	-0.0846745	0.235374	-0.204348	-0.274052	-0.191506	0.273603
98507-4week-1-D.tif	0.328333	-0.00119723	-0.249919	-0.2203	-0.239898	0.228814	0.228204	-0.11792	0.226597	0.11809	0.122151	-0.173254	0.122948	0.168346	0.012209	-0.205625	0.017499	0.204382	-0.0935211	-0.24613	-0.0853869	0.24432	-0.200305	-0.282162	-0.188912	0.282636
98508-4week-1-D.tif	0.348043	-0.00031716	-0.273415	-0.195832	-0.259805	0.202433	0.240739	-0.117794	0.240966	0.119648	0.124877	-0.159912	0.130012	0.162363	0.0114802	-0.19444	0.0199577	0.19452	-0.0994208	-0.231559	-0.0860628	0.23213	-0.205814	-0.280805	-0.191559	0.269565
98509-4week-1-D.tif	0.364126	-0.0148579	-0.285035	-0.174389	-0.289613	0.17766	0.252499	-0.11489	0.248415	0.0981711	0.13611	-0.155973	0.13341	0.150171	0.020593	-0.186203	0.0189363	0.191274	-0.0929565	-0.219429	-0.0940346	0.231901	-0.205541	-0.255934	-0.206908	0.272499
98510-4week-1-D.tif	0.340307	0.000123439	-0.272084	-0.185984	-0.261725	0.19312	0.239302	-0.127295	0.234138	0.120114	0.127355	-0.171657	0.127278	0.167449	0.0150227	-0.200426	0.021558	0.206314	-0.093999	-0.236031	-0.0850189	0.237362	-0.201719	-0.275165	-0.190415	0.272075
98511-4week-1-D.tif	0.301456	-0.00669569	-0.224673	-0.238411	-0.230961	0.215555	0.208245	-0.128869	0.210097	0.125313	0.111425	-0.186653	0.114207	0.179324	0.0130235	-0.225515	0.0198824	0.2277	-0.0875312	-0.255554	-0.0757265	0.271755	-0.186346	-0.289694	-0.1731	0.311743
98513-4week-1-D.tif	0.321699	-0.00173124	-0.252103	-0.205601	-0.244455	0.207723	0.224117	-0.126864	0.221752	0.124036	0.118996	-0.178658	0.119627	0.172864	0.0128532	-0.211811	0.0199195	0.215914	-0.0901886	-0.248594	-0.081426	0.249865	-0.191307	-0.289437	-0.179485	0.292295
98516-4week-1-D.tif	0.355331	-0.00258708	-0.281915	-0.195942	-0.275547	0.172497	0.244504	-0.113823	0.246845	0.110591	0.127816	-0.157231	0.136911	0.161928	0.0121177	-0.188716	0.025696	0.198083	-0.101205	-0.223312	-0.0842585	0.233867	-0.212313	-0.264941	-0.193983	0.269587
98517-4week-1-D.tif	0.354285	-0.000802852	-0.269732	-0.212051	-0.266147	0.205387	0.245429	-0.113247	0.244468	0.109655	0.128824	-0.157725	0.131096	0.151394	0.0133668	-0.190842	0.0196335	0.189834	-0.0993685	-0.227071	-0.0898649	0.231596	-0.212719	-0.259455	-0.199271	0.273329
98519-4week-1-D.tif	0.327483	-0.00716777	-0.252545	-0.200886	-0.242312	0.231666	0.228748	-0.124435	0.226745	0.122672	0.121611	-0.17072	0.120152	0.167922	0.0173881	-0.213327	0.0153973	0.205754	-0.0872495	-0.25197	-0.088263	0.243111	-0.194298	-0.281812	-0.192856	0.279194
98520-4week-1-D.tif	0.318086	-0.00271378	-0.247081	-0.194598	-0.229278	0.23954	0.232396	-0.147247	0.213903	0.128722	0.124371	-0.18458	0.111996	0.178288	0.0184476	-0.216527	0.0102161	0.213522	-0.0866657	-0.248172	-0.0910629	0.243776	-0.18673	-0.291834	-0.188599	0.281824
98521-4week-1-D.tif	0.337624	-0.000849059	-0.259704	-0.21649	-0.250535	0.213125	0.232178	-0.113591	0.234941	0.117735	0.122406	-0.166435	0.128967	0.167256	0.0109445	-0.200694	0.0199205	0.198401	-0.0980028	-0.237863	-0.0843424	0.23946	-0.205187	-0.278227	-0.189208	0.278171
98525-4week-1-D.tif	0.325914	-0.0166435	-0.255842	-0.165935	-0.243512	0.236733	0.229195	-0.132053	0.223098	0.123242	0.124347	-0.175761	0.116705	0.173932	0.0200832	-0.210604	0.011497	0.210461	-0.0803629	-0.257423	-0.0949632	0.236806	-0.181093	-0.299993	-0.195066	0.27724
98527-4week-1-D.tif	0.327104	-0.0211502	-0.246769	-0.204002	-0.257713	0.210254	0.22551	-0.124952	0.225099	0.111886	0.121807	-0.173537	0.120301	0.168958	0.0197402	-0.212274	0.0136635	0.208632	-0.0833965	-0.24205	-0.090053	0.251662	-0.184722	-0.275897	-0.190571	0.302472
98529-4week-1-D.tif	0.347442	-0.00737413	-0.271529	-0.177998	-0.262912	0.217105	0.244147	-0.122321	0.23684	0.11332	0.133362	-0.171536	0.124824	0.158641	0.0195866	-0.197667	0.0144682	0.195341	-0.0913058	-0.230945	-0.094025	0.231341	-0.198604	-0.275165	-0.202293	0.267258
98533-4week-1-D.tif	0.351207	0.00806705	-0.283604	-0.200533	-0.27332	0.15739	0.241656	-0.109573	0.242586	0.105204	0.125016	-0.156143	0.136768	0.161935	0.0107369	-0.193263	0.0289193	0.20159	-0.101912	-0.229826	-0.0781539	0.241038	-0.21457	-0.266396	-0.185331	0.28051
98535-4week-1-D.tif	0.366615	-0.0127345	-0.290818	-0.15684	-0.290649	0.183174	0.253276	-0.106366	0.248818	0.0953743	0.137161	-0.151876	0.132841	0.145642	0.0224309	-0.189539	0.0185422	0.187733	-0.091314	-0.226951	-0.0941088	0.229293	-0.204891	-0.264331	-0.207905	0.26742
98538-4week-1-D.tif	0.357073	-0.00593537	-0.27229	-0.209643	-0.267999	0.210874	0.24724	-0.107706	0.243315	0.0982318	0.132302	-0.156418	0.132947	0.154395	0.015104	-0.186368	0.0184433	0.188744	-0.0989372	-0.223025	-0.0925942	0.229575	-0.211289	-0.26302	-0.203316	0.270296
98539-4week-1-D.tif	0.335412	0.000402532	-0.260697	-0.2181	-0.256579	0.192711	0.226741	-0.107674	0.23378	0.113417	0.118484	-0.164248	0.130002	0.166014	0.0100219	-0.203793	0.0252698	0.2067	-0.0965751	-0.242645	-0.0799994	0.243487	-0.20413	-0.277581	-0.181731	0.291311
98540-4week-1-D.tif	0.362707	-0.0148592	-0.283723	-0.173033	-0.280321	0.202998	0.252009	-0.112435	0.24767	0.100451	0.13587	-0.153478	0.133235	0.153024	0.020475	-0.186577	0.0180017	0.190269	-0.0925749	-0.22673	-0.0967843	0.223457	-0.206192	-0.263197	-0.210371	0.260111
98541-4week-1-D.tif	0.375123	-0.00845966	-0.294872	-0.170823	-0.28992	0.189834	0.259537	-0.10468	0.254459	0.0930831	0.138871	-0.146299	0.136898	0.144134	0.0188899	-0.177238	0.0181782	0.177999	-0.097657	-0.217619	-0.095899	0.220824	-0.212942	-0.261144	-0.210667	0.260388
98542-4week-1-D.tif	0.381678	-0.00707868	-0.302016	-0.162725	-0.298557	0.176228	0.263499	-0.103361	0.260163	0.0930339	0.140663	-0.143319	0.13954	0.138222	0.0195554	-0.176003	0.0211855	0.179212	-0.0989463	-0.214653	-0.0964664	0.216599	-0.217081	-0.253231	-0.213218	0.257077
98544-4week-1-D.tif	0.344925	-0.00458439	-0.272322	-0.182716	-0.26309	0.207603	0.239348	-0.116375	0.237148	0.114439	0.128928	-0.167353	0.126311	0.158026	0.0169918	-0.199335	0.0192858	0.200255	-0.0918941	-0.238193	-0.0886147	0.235146	-0.200467	-0.276961	-0.19655	0.270048
98545-4week-1-D.tif	0.343122	-0.00318911	-0.266766	-0.206324	-0.264126	0.190486	0.236079	-0.117181	0.238983	0.116598	0.124605	-0.16667	0.130278	0.162715	0.0113391	-0.194773	0.0219233	0.199872	-0.0963231	-0.234173	-0.0841084	0.240689	-0.204987	-0.269518	-0.190019	0.281467
98547-4week-1-D.tif	0.341777	-0.00726204	-0.269462	-0.161834	-0.254574	0.227499	0.242532	-0.130567	0.229527	0.116842	0.130419	-0.167599	0.117863	0.160271	0.0212681	-0.203829	0.0104956	0.197735	-0.0860437	-0.243639	-0.0941157	0.234097	-0.190696	-0.290898	-0.19899	0.269184
98548-4week-1-D.tif	0.358547	-0.0085543	-0.280542	-0.193136	-0.274816	0.18817	0.244144	-0.10879	0.249778	0.110903	0.126837	-0.150362	0.135197	0.154434	0.0125454	-0.186761	0.0229393	0.192874	-0.0992334	-0.226641	-0.0876372	0.230768	-0.209586	-0.270342	-0.198173	0.267438
98550-4week-1-D.tif	0.350588	-0.00288049	-0.283098	-0.189999	-0.276526	0.150048	0.238278	-0.114696	0.246657	0.117991	0.123183	-0.15979	0.138019	0.167138	0.00933641	-0.190994	0.0295129	0.206111	-0.100286	-0.229904	-0.0793813	0.238114	-0.209966	-0.268834	-0.186317	0.277696
98551-4week-1-D.tif	0.362494	-0.0120583	-0.281412	-0.185471	-0.281873	0.190404	0.251502	-0.115517	0.248532	0.102812	0.134222	-0.155494	0.134879	0.156131	0.0184464	-0.187347	0.0181117	0.187482	-0.096063	-0.218832	-0.0949982	0.225268	-0.208148	-0.257287	-0.205693	0.26991
98552-4week-1-D.tif	0.347556	-0.00500951	-0.276667	-0.161831	-0.267752	0.20992	0.244153	-0.120457	0.236728	0.113759	0.134926	-0.175273	0.125758	0.160028	0.0222973	-0.204365	0.0159518	0.196806	-0.0895556	-0.233249	-0.0936281	0.228972	-0.197847	-0.274508	-0.20192	0.265207
98558-4week-1-D.tif	0.319629	4.43505e-05	-0.247111	-0.214498	-0.239445	0.217189	0.222977	-0.125579	0.221741	0.126164	0.118914	-0.180196	0.12079	0.175828	0.0136841	-0.216804	0.0180648	0.210632	-0.0914813	-0.248772	-0.0825196	0.248272	-0.194507	-0.28453	-0.180735	0.292249
98560-4week-1-D.tif	0.322919	-0.0026194	-0.261413	-0.186408	-0.256492	0.180892	0.226248	-0.132487	0.222771	0.124405	0.120182	-0.17917	0.123228	0.179989	0.0156423	-0.214354	0.0213327	0.215756	-0.0868806	-0.250338	-0.0788351	0.25254	-0.190717	-0.281953	-0.177986	0.293746
98566-4week-1-D.tif	0.326193	0.0133442	-0.269054	-0.198186	-0.241612	0.202221	0.224591	-0.112555	0.226863	0.127416	0.116424	-0.168701	0.12795	0.178203	0.00966534	-0.21403	0.02613	0.208942	-0.0975142	-0.254361	-0.0732961	0.242541	-0.202794	-0.299153	-0.173546	0.274317
98569-4week-1-D.tif	0.3346	-0.00207958	-0.258961	-0.218886	-0.257384	0.199382	0.231929	-0.114078	0.229819	0.106515	0.125278	-0.170436	0.128549	0.167239	0.0146772	-0.203394	0.0235107	0.20931	-0.0951185	-0.236048	-0.0827539	0.246812	-0.20494	-0.268713	-0.189205	0.284377
98570-4week-1-D.tif	0.356747	0.00313903	-0.287815	-0.180418	-0.267076	0.196659	0.244435	-0.1066	0.248127	0.116823	0.127253	-0.153084	0.1359	0.159103	0.0117964	-0.191431	0.0250766	0.193279	-0.101662	-0.232969	-0.0850452	0.223417	-0.212771	-0.281409	-0.194966	0.253492
98571-4week-1-D.tif	0.366104	0.00321443	-0.291686	-0.186612	-0.278621	0.185919	0.250199	-0.100795	0.253764	0.107014	0.131544	-0.150643	0.13928	0.150867	0.0129916	-0.185817	0.0250102	0.185364	-0.103298	-0.223929	-0.0873778	0.222029	-0.218223	-0.265282	-0.199687	0.258671
98572-4week-1-D.tif	0.331271	0.00890215	-0.261411	-0.219794	-0.247784	0.199513	0.228061	-0.113745	0.233059	0.124846	0.120834	-0.173681	0.130811	0.172694	0.00771602	-0.203811	0.0265556	0.207322	-0.101062	-0.241404	-0.0772651	0.241791	-0.209628	-0.278917	-0.181159	0.276284
98573-4week-1-D.tif	0.369773	-0.00376088	-0.29886	-0.163026	-0.29027	0.173256	0.253155	-0.0977634	0.254436	0.0981339	0.136907	-0.154182	0.140546	0.151745	0.0183613	-0.187535	0.0251302	0.188802	-0.0993876	-0.220652	-0.0899083	0.222347	-0.214842	-0.263284	-0.205041	0.255918
98576-4week-1-D.tif	0.343017	0.0110089	-0.272239	-0.210774	-0.254884	0.194507	0.236267	-0.111855	0.238822	0.120537	0.12164	-0.161815	0.131968	0.163648	0.00755431	-0.197365	0.02646	0.201512	-0.103423	-0.236501	-0.0792751	0.234647	-0.212425	-0.279648	-0.183481	0.272097
98577-4week-1-D.tif	0.31703	0.000863793	-0.238125	-0.239629	-0.239935	0.205374	0.220298	-0.125278	0.222268	0.124472	0.115053	-0.177164	0.123368	0.175968	0.0100022	-0.214329	0.0235072	0.217971	-0.095268	-0.246713	-0.077983	0.255668	-0.202115	-0.274938	-0.178101	0.297735
98582-4week-1-D.tif	0.325198	0.00501827	-0.260028	-0.211131	-0.25069	0.182234	0.223956	-0.12121	0.227522	0.125787	0.116216	-0.173104	0.126994	0.175471	0.00933658	-0.210284	0.0265084	0.215537	-0.0957282	-0.246785	-0.0744395	0.250949	-0.200693	-0.28325	-0.174151	0.290767
98584-4week-1-D.tif	0.347633	-0.00861401	-0.271855	-0.180066	-0.267362	0.206149	0.240798	-0.118062	0.239837	0.115228	0.129452	-0.166007	0.126791	0.157111	0.017818	-0.198044	0.0164222	0.193983	-0.0904265	-0.237112	-0.0911519	0.233914	-0.199196	-0.272337	-0.198761	0.273857
98596-4week-1-D.tif	0.31571	-0.00824226	-0.246711	-0.195994	-0.244044	0.216077	0.223735	-0.137179	0.217963	0.127168	0.122241	-0.188225	0.117462	0.179376	0.0187223	-0.219683	0.0158744	0.217137	-0.0836556	-0.250745	-0.0862808	0.250168	-0.185694	-0.281695	-0.185322	0.291837
98603-4week-1-D.tif	0.317433	0.00113145	-0.247873	-0.210252	-0.233339	0.221638	0.224702	-0.133746	0.219977	0.132296	0.118365	-0.181346	0.119396	0.180667	0.0115222	-0.213465	0.0169441	0.212177	-0.0918925	-0.250674	-0.0820816	0.247685	-0.193189	-0.291698	-0.179964	0.285586
98604-4week-1-D.tif	0.345426	-0.00704645	-0.270453	-0.178563	-0.268469	0.204484	0.244525	-0.129193	0.236296	0.115292	0.133416	-0.173691	0.125785	0.161621	0.0216643	-0.203029	0.0152073	0.196493	-0.0891041	-0.232083	-0.0930942	0.234383	-0.199516	-0.261039	-0.201685	0.272374
98605-4week-1-D.tif	0.350443	-0.00172097	-0.281131	-0.170061	-0.274112	0.181831	0.247818	-0.130311	0.238799	0.114536	0.13167	-0.1653	0.129354	0.164075	0.0191528	-0.19928	0.019039	0.197365	-0.0931457	-0.229147	-0.0885323	0.233951	-0.203178	-0.266497	-0.196177	0.270559
98608-4week-1-D.tif	0.356707	-0.00291036	-0.271928	-0.208314	-0.26878	0.204526	0.247215	-0.111775	0.24349	0.102986	0.129963	-0.154994	0.131143	0.151656	0.0147614	-0.18992	0.0185123	0.189038	-0.0988839	-0.224312	-0.0918585	0.229408	-0.21064	-0.261859	-0.199703	0.276471
98610-4week-1-D.tif	0.325449	0.00480779	-0.248541	-0.232793	-0.234473	0.22274	0.221554	-0.112615	0.231453	0.129349	0.113967	-0.167522	0.127356	0.171186	0.00677308	-0.209441	0.0256484	0.211127	-0.0993327	-0.250883	-0.0791546	0.242122	-0.208037	-0.284915	-0.182664	0.276837
98611-4week-1-D.tif	0.339745	-0.029976	-0.259384	-0.127762	-0.260013	0.251211	0.247137	-0.143953	0.22246	0.105035	0.141396	-0.177932	0.110839	0.16137	0.0357267	-0.211718	-0.000655723	0.199949	-0.0703844	-0.245523	-0.110962	0.233448	-0.175293	-0.283017	-0.220611	0.268869
98612-4week-1-D.tif	0.315215	0.000553835	-0.236318	-0.234676	-0.225975	0.235394	0.223165	-0.126719	0.215365	0.1205	0.117856	-0.177306	0.118569	0.177798	0.0119324	-0.214382	0.0164399	0.213081	-0.0931428	-0.251059	-0.0830237	0.252468	-0.197634	-0.287491	-0.182449	0.291839
98614-4week-1-D.tif	0.316425	-0.00274237	-0.237476	-0.235739	-0.230515	0.228108	0.219592	-0.123025	0.222432	0.126101	0.115492	-0.17582	0.123917	0.180524	0.0107184	-0.214769	0.0199931	0.213451	-0.0949134	-0.249375	-0.0818175	0.250186	-0.200187	-0.283834	-0.183659	0.286933
98615-4week-1-D.tif	0.352525	-0.0149767	-0.276246	-0.139039	-0.269812	0.230794	0.255217	-0.134656	0.230139	0.0991511	0.142459	-0.166707	0.119914	0.158131	0.0312483	-0.202082	0.00605577	0.191688	-0.0801658	-0.23746	-0.104184	0.22759	-0.191104	-0.272749	-0.216046	0.260316
98620-4week-1-D.tif	0.354708	-0.0206061	-0.271647	-0.168735	-0.270413	0.231296	0.251768	-0.121469	0.236067	0.0959295	0.140128	-0.163861	0.12239	0.150657	0.027517	-0.194801	0.00810075	0.189777	-0.0842174	-0.229087	-0.103051	0.231166	-0.19471	-0.266666	-0.216642	0.266401
98621-4week-1-D.tif	0.356399	-0.0112532	-0.276526	-0.178817	-0.270285	0.219178	0.249594	-0.115273	0.242196	0.103188	0.136429	-0.162636	0.129399	0.154771	0.0212563	-0.192322	0.0157432	0.192023	-0.0915989	-0.228619	-0.0988379	0.222308	-0.203872	-0.264764	-0.209896	0.262216
98622-4week-1-D.tif	0.356685	-0.0102095	-0.275008	-0.186777	-0.270312	0.216333	0.248494	-0.113747	0.243683	0.104678	0.134228	-0.159055	0.129646	0.152385	0.0202188	-0.193691	0.0158548	0.189323	-0.0930023	-0.228084	-0.0966938	0.225785	-0.205655	-0.26232	-0.208138	0.265379
98623-4week-1-D.tif	0.315749	-0.0051769	-0.244081	-0.208391	-0.231954	0.234001	0.221698	-0.127969	0.217439	0.12507	0.119033	-0.180067	0.116755	0.176386	0.0156705	-0.217856	0.0153113	0.213816	-0.0868696	-0.255324	-0.0847998	0.250636	-0.188943	-0.292625	-0.185008	0.287499
98624-4week-1-D.tif	0.334661	-0.0178235	-0.257553	-0.192511	-0.256273	0.217757	0.231628	-0.125145	0.234702	0.121918	0.124838	-0.171614	0.123812	0.165736	0.0175403	-0.203931	0.0172964	0.207785	-0.087759	-0.240411	-0.0909302	0.24097	-0.192902	-0.276846	-0.199061	0.274117
98626-4week-1-D.tif	0.346144	-0.0121622	-0.262157	-0.199503	-0.264452	0.217451	0.243992	-0.123682	0.234509	0.104538	0.132507	-0.167253	0.124696	0.157722	0.0209275	-0.198557	0.013126	0.19525	-0.0896717	-0.229542	-0.096048	0.235924	-0.199683	-0.260349	-0.203892	0.280163
98627-4week-1-D.tif	0.321943	-0.0125091	-0.250431	-0.16325	-0.242955	0.235399	0.234658	-0.152063	0.212064	0.12157	0.128557	-0.18546	0.106823	0.172308	0.0255064	-0.217959	0.00318862	0.208778	-0.0764522	-0.250144	-0.0957715	0.247651	-0.17424	-0.294521	-0.192889	0.290201
98628-4week-1-D.tif	0.317521	-0.0181424	-0.242784	-0.193966	-0.245082	0.23088	0.228655	-0.14148	0.213745	0.115002	0.127263	-0.186301	0.112499	0.173173	0.0244683	-0.216993	0.0105573	0.216886	-0.0781215	-0.247599	-0.0918141	0.255869	-0.180666	-0.278195	-0.19624	0.290866
98630-4week-1-D.tif	0.310032	-0.0100509	-0.235226	-0.217319	-0.232295	0.231248	0.218998	-0.134479	0.215057	0.12648	0.119112	-0.186254	0.113971	0.175741	0.0172602	-0.220886	0.0169159	0.2231	-0.0855803	-0.251417	-0.0841992	0.258821	-0.18696	-0.285844	-0.187085	0.29086
98631-4week-1-D.tif	0.307239	-0.00703252	-0.238081	-0.203563	-0.234552	0.224011	0.221062	-0.144383	0.210402	0.129504	0.120427	-0.192255	0.112062	0.181524	0.0187187	-0.223776	0.0139655	0.222056	-0.0819075	-0.254877	-0.0849725	0.257273	-0.182208	-0.285864	-0.182155	0.297382
98632-4week-1-D.tif	0.346382	-0.00328702	-0.270097	-0.192527	-0.260653	0.209803	0.240081	-0.117057	0.23839	0.115312	0.12732	-0.164255	0.127149	0.158713	0.0142844	-0.195715	0.018084	0.195875	-0.0943679	-0.236345	-0.0893462	0.232452	-0.202349	-0.27677	-0.194877	0.273802
98633-4week-1-D.tif	0.347975	-0.0144609	-0.259292	-0.20684	-0.262316	0.222188	0.243294	-0.120777	0.235767	0.102836	0.130855	-0.163601	0.123799	0.153878	0.0185739	-0.193993	0.0130624	0.196147	-0.0912736	-0.227699	-0.0976087	0.234258	-0.199106	-0.264873	-0.203729	0.282938
98634-4week-1-D.tif	0.367611	-0.00607631	-0.286475	-0.175726	-0.28145	0.201166	0.254642	-0.106487	0.247976	0.095735	0.136209	-0.150603	0.131982	0.145137	0.0193584	-0.18587	0.0152494	0.178807	-0.0950442	-0.224104	-0.0964964	0.221908	-0.207669	-0.265522	-0.205892	0.271636
98635-4week-1-D.tif	0.347795	-0.00337762	-0.271965	-0.185105	-0.259147	0.217477	0.243775	-0.119514	0.235438	0.110836	0.130286	-0.164264	0.124726	0.158104	0.0166422	-0.195144	0.0149772	0.193982	-0.0933679	-0.234193	-0.0916475	0.231809	-0.20014	-0.281542	-0.197372	0.27093
98636-4week-1-D.tif	0.338183	-0.00308462	-0.265379	-0.193611	-0.258203	0.204886	0.236344	-0.120359	0.22831	0.108571	0.126395	-0.168809	0.123025	0.162953	0.0158446	-0.200651	0.0178513	0.204453	-0.0908769	-0.239671	-0.0868855	0.241518	-0.195846	-0.282334	-0.188764	0.286139
98641-4week-1-D.tif	0.371672	-0.00751362	-0.298396	-0.153921	-0.28457	0.198851	0.256778	-0.100431	0.252476	0.0959684	0.137462	-0.143383	0.137031	0.148615	0.0202953	-0.185689	0.0213168	0.186182	-0.0965352	-0.227871	-0.0946074	0.216267	-0.212377	-0.27343	-0.210546	0.246356
98644-4week-1-D.tif	0.313423	-0.00299347	-0.242315	-0.207261	-0.224745	0.241539	0.222879	-0.131877	0.210536	0.122621	0.118075	-0.178077	0.110501	0.17436	0.0158676	-0.218602	0.0115352	0.213997	-0.0854409	-0.258762	-0.0839305	0.255807	-0.184624	-0.302748	-0.18176	0.291996
98646-4week-1-D.tif	0.341077	-0.00264302	-0.262817	-0.196875	-0.246495	0.231506	0.240196	-0.124917	0.2319	0.117473	0.125864	-0.163676	0.12079	0.159253	0.0137903	-0.196176	0.0144849	0.199058	-0.0923719	-0.243185	-0.0916555	0.233151	-0.199222	-0.284943	-0.19554	0.271974
98947-4week-1-D.tif	0.34751	-0.00879949	-0.264595	-0.198013	-0.255934	0.230256	0.244649	-0.120939	0.234932	0.107019	0.130175	-0.159605	0.123863	0.156492	0.018868	-0.197224	0.0126366	0.192882	-0.0916606	-0.234582	-0.0955101	0.232389	-0.20143	-0.271709	-0.203504	0.271834
98649-4week-1-D.tif	0.306565	-0.00978	-0.236843	-0.186907	-0.217677	0.259794	0.221713	-0.141566	0.203447	0.124853	0.121836	-0.189289	0.103741	0.178247	0.0223165	-0.22742	0.00443286	0.216534	-0.0765789	-0.265292	-0.0924495	0.253505	-0.173125	-0.307046	-0.18738	0.294367
98651-4week-1-D.tif	0.373494	0.000621716	-0.29014	-0.1901	-0.28665	0.184551	0.262718	-0.118355	0.25461	0.101986	0.138433	-0.151199	0.136392	0.143614	0.0169553	-0.179163	0.0197425	0.180708	-0.102101	-0.210256	-0.0947609	0.221045	-0.219594	-0.244788	-0.209098	0.261336
98652-4week-1-D.tif	0.371898	-0.00632869	-0.29458	-0.168802	-0.284925	0.193775	0.257063	-0.106693	0.254896	0.102111	0.136795	-0.148021	0.137676	0.148851	0.0180269	-0.182536	0.0204283	0.182616	-0.0989111	-0.220584	-0.0948644	0.216583	-0.21416	-0.263626	-0.209343	0.252656
98653-4week-1-D.tif	0.366283	0.00188459	-0.288904	-0.176143	-0.273329	0.209676	0.256082	-0.111401	0.248576	0.105413	0.135927	-0.152435	0.131988	0.146476	0.0172537	-0.185846	0.0180459	0.182934	-0.098638	-0.225551	-0.0941516	0.218782	-0.212936	-0.268371	-0.206196	0.254581
98654-4week-1-D.tif	0.315608	-0.011133	-0.241835	-0.194889	-0.226751	0.250364	0.226641	-0.138451	0.210669	0.120709	0.121469	-0.177708	0.107778	0.172278	0.0208324	-0.219771	0.00735897	0.213277	-0.080583	-0.257632	-0.0907056	0.253098	-0.180003	-0.299263	-0.190477	0.289121
98659-4week-1-D.tif	0.333006	-0.0131449	-0.258984	-0.189957	-0.248848	0.228496	0.23376	-0.124513	0.226665	0.113504	0.125709	-0.167689	0.120587	0.166895	0.0192887	-0.206184	0.0149565	0.20719	-0.0868774	-0.244594	-0.0902245	0.242995	-0.191679	-0.286754	-0.197359	0.273756
98660-4week-1-D.tif	0.351451	0.002576	-0.276399	-0.19617	-0.258744	0.212422	0.242771	-0.110413	0.242379	0.11457	0.127053	-0.157306	0.130989	0.15757	0.0122375	-0.193378	0.0215788	0.194481	-0.0999705	-0.233841	-0.0878825	0.226048	-0.210025	-0.278861	-0.195439	0.262302
98665-4week-1-D.tif	0.324822	-0.00972169	-0.240673	-0.216894	-0.232427	0.245484	0.22757	-0.126296	0.220383	0.116717	0.120278	-0.171379	0.113149	0.163671	0.0156392	-0.210403	0.0109416	0.208215	-0.0877907	-0.248954	-0.0913868	0.247768	-0.189259	-0.289905	-0.191247	0.291698
98666-4week-1-D.tif	0.373691	-0.00210942	-0.294472	-0.176309	-0.280086	0.205787	0.25745	-0.0992033	0.254453	0.0975621	0.136724	-0.144752	0.136548	0.142683	0.0166816	-0.180195	0.0203403	0.180435	-0.100882	-0.221433	-0.0950447	0.214546	-0.216219	-0.268593	-0.209184	0.251581
98667-4week-1-D.tif	0.338935	-0.00318119	-0.262007	-0.199687	-0.249154	0.228149	0.237324	-0.1188	0.231106	0.113746	0.127618	-0.168866	0.12271	0.160633	0.0164227	-0.20237	0.0168326	0.202107	-0.0927504	-0.23945	-0.0905831	0.23542	-0.200064	-0.280175	-0.196389	0.272475
98670-4week-1-D.tif	0.346814	-0.00258782	-0.275365	-0.169109	-0.263342	0.210743	0.246088	-0.128046	0.233443	0.112559	0.131621	-0.165036	0.123469	0.159863	0.0203738	-0.201126	0.0155809	0.198581	-0.0896254	-0.238028	-0.0923643	0.230718	-0.198382	-0.277275	-0.198311	0.268745
98671-4week-1-D.tif	0.354463	0.00904566	-0.278896	-0.210829	-0.271094	0.172596	0.242744	-0.106685	0.245204	0.107712	0.124913	-0.154197	0.134869	0.15135	0.0096381	-0.19132	0.0268373	0.195322	-0.103952	-0.22675	-0.0806324	0.2381	-0.216122	-0.265189	-0.187972	0.280844
98674-4week-1-D.tif	0.344009	-0.00251519	-0.276075	-0.186586	-0.266664	0.184835	0.237486	-0.117113	0.238362	0.115817	0.125108	-0.163405	0.131604	0.167178	0.0135339	-0.197566	0.0236597	0.202807	-0.0946843	-0.238641	-0.0829085	0.238008	-0.203881	-0.27605	-0.189551	0.273231
98676-4week-1-D.tif	0.361704	-0.0105539	-0.28424	-0.171136	-0.274922	0.204016	0.251693	-0.118897	0.2488	0.111875	0.132707	-0.151147	0.131411	0.152331	0.0183121	-0.188936	0.0184189	0.191206	-0.0952644	-0.226494	-0.0945377	0.223124	-0.206858	-0.27034	-0.207224	0.254951
98681-4week-1-D.tif	0.360189	-0.00518019	-0.279745	-0.189554	-0.277762	0.193884	0.249537	-0.112455	0.24665	0.104429	0.133156	-0.157596	0.132248	0.150211	0.0175884	-0.190525	0.0186845	0.18769	-0.0964931	-0.223	-0.0925432	0.22839	-0.208964	-0.25898	-0.202547	0.272686
98682-4week-1-D.tif	0.361424	-0.00949844	-0.286439	-0.157119	-0.272827	0.212517	0.250732	-0.113284	0.247797	0.111086	0.133924	-0.153777	0.131284	0.1542	0.0190192	-0.190159	0.0172119	0.18893	-0.0935054	-0.233106	-0.0968311	0.216197	-0.204575	-0.279296	-0.207215	0.253309
98686-4week-1-D.tif	0.322724	-0.00459006	-0.255343	-0.198876	-0.243437	0.212034	0.223725	-0.125191	0.224115	0.12636	0.117184	-0.172304	0.122424	0.177721	0.0136993	-0.214142	0.0195171	0.212547	-0.0898205	-0.251766	-0.081679	0.246708	-0.191692	-0.293054	-0.181418	0.284555
98689-4week-1-D.tif	0.362825	0.00895626	-0.300111	-0.139322	-0.268411	0.208331	0.25068	-0.102616	0.247464	0.113467	0.131604	-0.147426	0.13426	0.156109	0.0159605	-0.194531	0.0217872	0.184954	-0.0982808	-0.244499	-0.0882286	0.212971	-0.211228	-0.297406	-0.198322	0.241012
98692-4week-1-D.tif	0.358457	-0.00603246	-0.280134	-0.183092	-0.268856	0.212714	0.24906	-0.111549	0.244543	0.106133	0.133066	-0.156187	0.131038	0.154204	0.0181787	-0.192637	0.0174744	0.18916	-0.0968436	-0.225203	-0.0942746	0.223455	-0.207221	-0.272075	-0.204489	0.26111
98693-4week-1-D.tif	0.344435	0.0198674	-0.276703	-0.207514	-0.246685	0.210706	0.239373	-0.110888	0.240315	0.127402	0.122628	-0.161043	0.132684	0.164328	0.00664747	-0.198758	0.0265602	0.19672	-0.106766	-0.239532	-0.0796549	0.225155	-0.218178	-0.283601	-0.184657	0.257157
98697-4week-1-D.tif	0.381803	-0.00948316	-0.301324	-0.160062	-0.30104	0.181341	0.264267	-0.0981632	0.257652	0.0834364	0.144444	-0.147868	0.138002	0.134875	0.0225298	-0.175367	0.0196561	0.179215	-0.0959302	-0.214831	-0.098208	0.220103	-0.214866	-0.25121	-0.216985	0.258014
98698-4week-1-D.tif	0.35602	0.00686525	-0.279705	-0.208733	-0.270154	0.180653	0.243868	-0.108629	0.249155	0.115501	0.126118	-0.156454	0.137571	0.156592	0.00941057	-0.190859	0.0268902	0.193068	-0.105542	-0.224643	-0.0830657	0.229314	-0.218764	-0.262169	-0.191801	0.269496
98699-4week-1-D.tif	0.369068	-0.00705049	-0.293542	-0.166792	-0.288567	0.180781	0.255171	-0.109606	0.253872	0.10416	0.13658	-0.152824	0.137717	0.151481	0.0194294	-0.188067	0.0207449	0.183975	-0.0975409	-0.219483	-0.0928697	0.222922	-0.212571	-0.257924	-0.207491	0.258429
98700-4week-1-D.tif	0.360881	-0.00395618	-0.284724	-0.168222	-0.274881	0.204823	0.251273	-0.113956	0.246247	0.109299	0.13561	-0.161231	0.129425	0.148435	0.0192673	-0.191774	0.0175489	0.189232	-0.0951715	-0.22517	-0.0944383	0.223278	-0.205831	-0.27106	-0.205207	0.260303
98701-4week-1-D.tif	0.355513	-0.00290084	-0.279774	-0.190506	-0.273516	0.192388	0.249382	-0.120393	0.244616	0.109886	0.132841	-0.16143	0.134663	0.162342	0.0174735	-0.194125	0.0218255	0.195737	-0.0981049	-0.222899	-0.0912072	0.225194	-0.211973	-0.256328	-0.201739	0.263035
98703-4week-1-D.tif	0.343381	-0.00191268	-0.267835	-0.203567	-0.263803	0.1932	0.238859	-0.119502	0.235918	0.111614	0.125625	-0.163737	0.128879	0.162812	0.0145374	-0.199444	0.0212801	0.201695	-0.0955294	-0.233275	-0.0856949	0.238866	-0.204762	-0.268363	-0.190856	0.281615
98704-4week-1-D.tif	0.367148	-0.00731988	-0.293244	-0.15168	-0.283592	0.196641	0.255781	-0.111892	0.249458	0.103255	0.137571	-0.152141	0.133113	0.149743	0.0212322	-0.188584	0.0180474	0.185754	-0.0937246	-0.22795	-0.0950353	0.221101	-0.207672	-0.270364	-0.209083	0.253438
98705-4week-1-D.tif	0.348175	-0.000942595	-0.273107	-0.191759	-0.266779	0.195103	0.24235	-0.119396	0.238917	0.11363	0.128569	-0.165343	0.128228	0.157934	0.0150326	-0.196219	0.0194781	0.196548	-0.095473	-0.231143	-0.0878273	0.23469	-0.20404	-0.270461	-0.193522	0.277359
98706-4week-1-D.tif	0.298521	-0.00613601	-0.240663	-0.152637	-0.232763	0.232143	0.217882	-0.153137	0.196116	0.130741	0.122116	-0.202379	0.0983805	0.180712	0.0274337	-0.241012	0.00505899	0.223244	-0.067281	-0.274542	-0.0858621	0.264625	-0.161468	-0.307937	-0.177471	0.306316
98712-4week-1-D.tif	0.375572	-0.000559562	-0.302181	-0.165659	-0.283957	0.196282	0.256514	-0.094228	0.260259	0.104301	0.135618	-0.142303	0.142465	0.147651	0.0157903	-0.182551	0.0246511	0.179514	-0.102588	-0.22606	-0.0917909	0.210897	-0.221247	-0.267023	-0.209105	0.239739
98714-4week-1-D.tif	0.333259	-0.00723747	-0.245253	-0.232144	-0.24273	0.233474	0.232291	-0.119279	0.230985	0.114117	0.124198	-0.169175	0.123721	0.162159	0.0135592	-0.201529	0.0175708	0.204497	-0.0951031	-0.237698	-0.088897	0.244953	-0.205057	-0.269763	-0.198544	0.277625
98717-4week-1-D.tif	0.349691	-0.00182194	-0.268425	-0.205971	-0.265292	0.204943	0.244829	-0.117524	0.237946	0.105621	0.130713	-0.163784	0.128654	0.156898	0.0156	-0.193111	0.0171697	0.191656	-0.096082	-0.228171	-0.0901965	0.23533	-0.207154	-0.263031	-0.197454	0.278968
98719-4week-1-D.tif	0.339233	-0.000266592	-0.265306	-0.199559	-0.251633	0.219844	0.237294	-0.118845	0.234832	0.11992	0.128111	-0.172175	0.127735	0.16725	0.0157241	-0.204032	0.0179176	0.197142	-0.0959536	-0.235643	-0.0878339	0.234711	-0.204525	-0.275227	-0.195596	0.266881
98721-4week-1-D.tif	0.358332	-0.00494235	-0.279459	-0.183217	-0.270147	0.215882	0.249901	-0.109991	0.243908	0.103762	0.136871	-0.163844	0.129949	0.150387	0.0194258	-0.190784	0.0168654	0.188421	-0.0953579	-0.224968	-0.0948756	0.225954	-0.207619	-0.266466	-0.207793	0.259806
98722-4week-1-D.tif	0.373743	-0.00169194	-0.297537	-0.183536	-0.291165	0.167878	0.252426	-0.0936912	0.260845	0.101657	0.132608	-0.144177	0.143893	0.145767	0.0140722	-0.183125	0.027167	0.18222	-0.10301	-0.221624	-0.0879835	0.221913	-0.221735	-0.253243	-0.203324	0.261654
98725-4week-1-D.tif	0.321741	-0.00636262	-0.248646	-0.200364	-0.237795	0.230349	0.225517	-0.129949	0.223262	0.128754	0.120717	-0.179267	0.117346	0.172103	0.0159048	-0.214952	0.014406	0.209628	-0.0877971	-0.250242	-0.0869182	0.246452	-0.189552	-0.2894	-0.188185	0.283251
98728-4week-1-D.tif	0.339442	0.000130822	-0.263854	-0.206786	-0.251265	0.214426	0.234726	-0.115633	0.234544	0.117737	0.123468	-0.165336	0.126536	0.162835	0.0114189	-0.198548	0.0199973	0.200563	-0.0963262	-0.240258	-0.0851259	0.237765	-0.203531	-0.281784	-0.19003	0.274888
98730-4week-1-D.tif	0.362439	-0.0179482	-0.28058	-0.168029	-0.273412	0.22583	0.252297	-0.111549	0.248295	0.103948	0.137255	-0.154043	0.130615	0.150319	0.0231685	-0.191873	0.0143618	0.187045	-0.0909554	-0.228376	-0.102123	0.217937	-0.20426	-0.26599	-0.217101	0.252729
98732-4week-1-D.tif	0.320266	-0.022375	-0.24929	-0.151783	-0.236913	0.259821	0.231727	-0.138769	0.212872	0.115522	0.132445	-0.187935	0.108113	0.171321	0.0297145	-0.218908	0.0038312	0.211519	-0.0718026	-0.25897	-0.0999038	0.246323	-0.173059	-0.298979	-0.208002	0.273214
98737-4week-1-D.tif	0.333441	-0.0117495	-0.263317	-0.152514	-0.247994	0.243217	0.241856	-0.138939	0.221567	0.115697	0.136124	-0.183934	0.115317	0.169523	0.0274902	-0.211593	0.00784458	0.204953	-0.0806006	-0.243578	-0.0989146	0.235331	-0.185319	-0.288215	-0.207495	0.2618
98738-4week-1-D.tif	0.359205	-0.0161151	-0.278948	-0.174629	-0.270669	0.221594	0.252236	-0.117837	0.243749	0.102536	0.136243	-0.154233	0.129489	0.154495	0.0218544	-0.188854	0.0138837	0.188828	-0.091529	-0.227219	-0.0983286	0.226029	-0.203657	-0.2693	-0.213529	0.254704
98739-4week-1-D.tif	0.336319	-0.00277801	-0.257363	-0.206328	-0.242826	0.234363	0.236261	-0.122351	0.230658	0.118513	0.125481	-0.168749	0.123571	0.166756	0.0152126	-0.204697	0.0150516	0.199816	-0.0941011	-0.240299	-0.0920509	0.232276	-0.20091	-0.280152	-0.195304	0.27363
98740-4week-1-D.tif	0.340062	-0.00147339	-0.27041	-0.176818	-0.260366	0.218936	0.23546	-0.107867	0.233548	0.112454	0.131483	-0.176163	0.125677	0.159471	0.0219199	-0.212971	0.0177176	0.196883	-0.0881749	-0.2452	-0.0897608	0.234107	-0.199168	-0.272965	-0.197988	0.271606
98742-4week-1-D.tif	0.335865	-0.00659035	-0.244426	-0.235547	-0.242157	0.233509	0.232142	-0.117184	0.233168	0.115547	0.121157	-0.163452	0.123996	0.161038	0.0128978	-0.203772	0.0148303	0.197153	-0.0975587	-0.23539	-0.0886942	0.244793	-0.205171	-0.272351	-0.196048	0.282247
98743-4week-1-D.tif	0.366957	-0.00457022	-0.294317	-0.157763	-0.28559	0.179554	0.254477	-0.114054	0.250915	0.106827	0.134976	-0.152333	0.134705	0.150965	0.0181367	-0.186587	0.0205654	0.18773	-0.0967459	-0.22364	-0.0915262	0.223878	-0.209123	-0.269981	-0.203431	0.259974
98746-4week-1-D.tif	0.326165	-0.00208859	-0.250233	-0.210226	-0.23332	0.23847	0.228556	-0.12273	0.223018	0.120994	0.121385	-0.172819	0.118408	0.16891	0.0142267	-0.210546	0.0152939	0.207729	-0.0920402	-0.247929	-0.087677	0.242275	-0.194918	-0.29228	-0.188863	0.280241
98747-4week-1-D.tif	0.364363	-0.00973867	-0.285125	-0.170219	-0.27944	0.20365	0.25368	-0.112264	0.245891	0.0984006	0.135514	-0.150246	0.129822	0.146089	0.0204346	-0.187358	0.0168299	0.188708	-0.092697	-0.227838	-0.0965621	0.22355	-0.205242	-0.268178	-0.207469	0.265444
98748-4week-1-D.tif	0.367481	-0.0101984	-0.290222	-0.136966	-0.28414	0.209674	0.258403	-0.113071	0.24441	0.0962248	0.142014	-0.156559	0.127404	0.145574	0.026462	-0.192651	0.0108901	0.180151	-0.0882789	-0.228541	-0.101059	0.220355	-0.200381	-0.274543	-0.212982	0.260551
98751-4week-1-D.tif	0.332403	-0.0151801	-0.262531	-0.132239	-0.265666	0.216048	0.240762	-0.146357	0.218769	0.113418	0.135911	-0.186129	0.111158	0.165305	0.0320675	-0.220934	0.00591871	0.206332	-0.073086	-0.246606	-0.0969853	0.246426	-0.176245	-0.281254	-0.202475	0.28117
98753-4week-1-D.tif	0.346819	-0.00699533	-0.27152	-0.174808	-0.257681	0.225359	0.242565	-0.118468	0.234966	0.11233	0.130712	-0.164746	0.122924	0.157827	0.0196269	-0.20123	0.0127808	0.19326	-0.0909109	-0.235911	-0.0938025	0.230925	-0.196444	-0.285998	-0.200034	0.268455
98757-4week-1-D.tif	0.317193	-0.00110207	-0.244819	-0.210214	-0.226549	0.240935	0.225158	-0.129715	0.216247	0.125433	0.120051	-0.178844	0.11516	0.175334	0.0156571	-0.217964	0.0132321	0.210683	-0.0895803	-0.252547	-0.085253	0.249408	-0.191029	-0.295369	-0.185468	0.283962
98763-4week-1-D.tif	0.340913	-0.0157517	-0.263515	-0.166121	-0.248849	0.247132	0.244507	-0.133582	0.228262	0.112743	0.134678	-0.172078	0.117887	0.164234	0.0244109	-0.201926	0.00614985	0.196683	-0.0838291	-0.239903	-0.101589	0.230906	-0.189289	-0.285854	-0.209737	0.263517
98764-4week-1-D.tif	0.343317	-0.00107982	-0.269803	-0.192453	-0.25399	0.217561	0.242105	-0.123479	0.23344	0.114599	0.127312	-0.161978	0.124654	0.161253	0.0148382	-0.195715	0.0175425	0.199205	-0.0935287	-0.240156	-0.0877405	0.236475	-0.202647	-0.280834	-0.195499	0.266603
98767-4week-1-D.tif	0.326432	-0.00376576	-0.261478	-0.123666	-0.250115	0.235415	0.236669	-0.142067	0.213855	0.121252	0.134048	-0.193299	0.108224	0.169348	0.0300142	-0.226856	0.00375613	0.203078	-0.0733308	-0.260234	-0.0965726	0.239625	-0.175023	-0.297737	-0.196477	0.278906
98768-4week-1-D.tif	0.353167	-0.00520903	-0.272808	-0.1939	-0.265227	0.215052	0.246758	-0.115962	0.241211	0.107908	0.132093	-0.160515	0.128923	0.154982	0.0184348	-0.196145	0.0169645	0.191779	-0.0954949	-0.227561	-0.0937329	0.228105	-0.206835	-0.265424	-0.203453	0.266889
98770-4week-1-D.tif	0.317768	0.0103641	-0.25201	-0.220797	-0.235869	0.205972	0.223714	-0.127052	0.222498	0.133462	0.117248	-0.180072	0.123371	0.178826	0.0085398	-0.212956	0.0236546	0.213831	-0.0971649	-0.249845	-0.0737475	0.253244	-0.202817	-0.286715	-0.175184	0.281738
98772-4week-1-D.tif	0.347687	0.00580176	-0.274972	-0.200488	-0.261998	0.201146	0.240166	-0.109322	0.240986	0.114284	0.127863	-0.164306	0.132947	0.161262	0.0139495	-0.200549	0.0239638	0.196929	-0.0999338	-0.232922	-0.085514	0.228885	-0.21221	-0.26861	-0.192934	0.26789
98775-4week-1-D.tif	0.366975	0.00438712	-0.292278	-0.186103	-0.273878	0.197066	0.253156	-0.10485	0.252868	0.107536	0.132578	-0.149874	0.138673	0.153056	0.0116547	-0.180282	0.0240249	0.185582	-0.10437	-0.223807	-0.0892776	0.216695	-0.218874	-0.270543	-0.201252	0.251136
98776-4week-1-D.tif	0.304937	-0.00802651	-0.227691	-0.227607	-0.216944	0.250318	0.215959	-0.13028	0.205795	0.119764	0.116054	-0.182136	0.109745	0.178001	0.015643	-0.221652	0.0112587	0.21899	-0.084339	-0.260936	-0.0834767	0.264139	-0.183939	-0.300069	-0.183	0.299494
98782-4week-1-D.tif	0.340754	-0.0123898	-0.262338	-0.192139	-0.257832	0.219481	0.238393	-0.126027	0.237556	0.121174	0.12971	-0.17451	0.127394	0.168266	0.0187867	-0.203953	0.0156441	0.199759	-0.0924243	-0.229536	-0.0947097	0.230698	-0.198795	-0.269413	-0.202139	0.26859
98786-4week-1-D.tif	0.367866	-0.00310427	-0.285307	-0.198458	-0.282687	0.186266	0.253395	-0.106591	0.253689	0.101591	0.133955	-0.150917	0.137772	0.146925	0.0156831	-0.184739	0.022488	0.185363	-0.102234	-0.215076	-0.0913284	0.225555	-0.217971	-0.251439	-0.20532	0.264625
98791-4week-1-D.tif	0.330622	-0.00762132	-0.260846	-0.182166	-0.252246	0.212761	0.231621	-0.130717	0.229139	0.127089	0.123952	-0.175903	0.122038	0.172047	0.0174058	-0.210692	0.0160992	0.206351	-0.0879221	-0.245115	-0.0880149	0.239958	-0.191405	-0.28402	-0.190443	0.278028
98796-4week-1-D.tif	0.342212	0.00341	-0.26964	-0.195929	-0.256799	0.203723	0.241308	-0.126476	0.234965	0.120525	0.126882	-0.168745	0.12768	0.1674	0.0130772	-0.198249	0.0189758	0.198226	-0.0967768	-0.234811	-0.0869549	0.232238	-0.204697	-0.274922	-0.190233	0.273609
98798-4week-1-D.tif	0.34597	-0.004377	-0.267957	-0.20039	-0.265364	0.199639	0.240989	-0.120476	0.239072	0.114269	0.128901	-0.168175	0.129837	0.162676	0.0157496	-0.198229	0.01942	0.197582	-0.0956178	-0.229057	-0.0896166	0.233375	-0.205278	-0.26349	-0.196107	0.276651
98800-4week-1-D.tif	0.359844	-0.00714299	-0.275984	-0.20095	-0.268541	0.21329	0.250205	-0.112795	0.247726	0.106644	0.133783	-0.157706	0.133554	0.154126	0.0158216	-0.186347	0.0187695	0.189255	-0.100326	-0.21856	-0.0946699	0.223876	-0.212501	-0.262039	-0.207682	0.258348
98804-4week-1-D.tif	0.359802	-0.000183186	-0.280865	-0.191395	-0.271842	0.206877	0.250094	-0.106981	0.243945	0.0994052	0.134232	-0.156518	0.131822	0.149702	0.0178371	-0.191442	0.0195069	0.188992	-0.0975268	-0.226032	-0.0927988	0.22459	-0.211267	-0.26381	-0.20294	0.266795
98805-4week-1-D.tif	0.36224	-0.00371654	-0.280281	-0.193514	-0.280854	0.184328	0.258197	-0.131431	0.24617	0.105642	0.136379	-0.159383	0.133004	0.155885	0.0173009	-0.182801	0.017815	0.18859	-0.0975173	-0.21574	-0.0942828	0.227557	-0.212849	-0.245231	-0.205322	0.269815
98807-4week-1-D.tif	0.342397	-0.00652744	-0.271399	-0.161756	-0.261724	0.224414	0.245914	-0.129528	0.22869	0.109046	0.137426	-0.177687	0.121298	0.162628	0.0256945	-0.205041	0.011695	0.197687	-0.0839872	-0.240488	-0.0954651	0.234779	-0.194462	-0.271824	-0.206077	0.264298
98809-4week-1-D.tif	0.328703	-0.0161645	-0.253107	-0.17106	-0.245627	0.243737	0.234239	-0.132022	0.2182	0.111678	0.129503	-0.177095	0.110372	0.162712	0.0255176	-0.214184	0.00556019	0.204384	-0.077804	-0.251074	-0.0968538	0.244945	-0.179425	-0.291366	-0.199277	0.285509
98814-4week-1-D.tif	0.306278	-0.00466114	-0.235714	-0.218182	-0.228942	0.223444	0.214042	-0.132144	0.211953	0.12977	0.111722	-0.180438	0.114456	0.181925	0.0145087	-0.226594	0.0161463	0.21966	-0.0861739	-0.259496	-0.0790996	0.260928	-0.18476	-0.296438	-0.174416	0.302226
98817-4week-1-D.tif	0.346612	0.0020739	-0.272277	-0.205424	-0.262461	0.1955	0.238214	-0.110359	0.240181	0.113039	0.125122	-0.161063	0.131966	0.1607	0.012089	-0.197136	0.0237436	0.19853	-0.0996148	-0.232751	-0.083466	0.236025	-0.20953	-0.272625	-0.19058	0.27349
98818-4week-1-D.tif	0.336971	-0.0066006	-0.266372	-0.167886	-0.250636	0.230982	0.237199	-0.122642	0.226204	0.11389	0.127913	-0.167011	0.117275	0.160574	0.0216431	-0.210528	0.0123156	0.201321	-0.084898	-0.249991	-0.0918199	0.237436	-0.189774	-0.293123	-0.196022	0.273579
98821-4week-1-D.tif	0.321399	0.00174823	-0.253936	-0.1916	-0.226074	0.244645	0.226966	-0.127739	0.219485	0.129642	0.118529	-0.171641	0.116365	0.175741	0.0154652	-0.21893	0.0125981	0.205668	-0.0881896	-0.261101	-0.0870488	0.239187	-0.190793	-0.302922	-0.184765	0.277302
98823-4week-1-D.tif	0.33952	0.00105366	-0.266164	-0.203569	-0.252749	0.214596	0.236959	-0.11647	0.233179	0.114385	0.126137	-0.166618	0.127689	0.165472	0.0137277	-0.19976	0.019874	0.199717	-0.0952345	-0.240481	-0.0854736	0.237473	-0.205159	-0.277152	-0.192306	0.271353
98826-4week-1-D.tif	0.350519	-0.0126319	-0.265416	-0.19706	-0.257993	0.2316	0.244258	-0.116913	0.239405	0.108152	0.13107	-0.160789	0.125603	0.155101	0.0176038	-0.192238	0.0119549	0.189494	-0.0927383	-0.231016	-0.0970094	0.230254	-0.201133	-0.273357	-0.206125	0.269403
98827-4week-1-D.tif	0.367969	-0.00200331	-0.280295	-0.208886	-0.269915	0.215188	0.253867	-0.104	0.252905	0.101737	0.133325	-0.148106	0.13742	0.1495	0.0125805	-0.179408	0.0197136	0.180865	-0.104668	-0.218006	-0.0954893	0.215566	-0.219779	-0.26016	-0.207635	0.257714
98828-4week-1-D.tif	0.324925	-0.00565043	-0.245004	-0.221757	-0.237764	0.228759	0.226142	-0.123963	0.225739	0.122663	0.120251	-0.175322	0.121761	0.172293	0.012088	-0.207656	0.0162868	0.20742	-0.0933419	-0.243887	-0.0861873	0.246293	-0.196543	-0.28423	-0.188353	0.285037
98829-4week-1-D.tif	0.327967	-0.00542487	-0.25929	-0.185403	-0.242456	0.231741	0.229455	-0.121223	0.223637	0.118848	0.123745	-0.172289	0.119169	0.168916	0.0183472	-0.212945	0.0158017	0.207907	-0.0865093	-0.253424	-0.0876606	0.241636	-0.190928	-0.293769	-0.191279	0.27543
98830-4week-1-D.tif	0.324468	-0.00735899	-0.252737	-0.201339	-0.249027	0.205369	0.226612	-0.1304	0.22289	0.122329	0.119017	-0.17345	0.119305	0.172476	0.0147351	-0.21047	0.0153514	0.207706	-0.0879144	-0.246932	-0.0818456	0.255447	-0.188757	-0.28768	-0.182096	0.294304
98831-4week-1-D.tif	0.361164	-0.0105765	-0.276403	-0.189485	-0.271367	0.221972	0.25178	-0.111567	0.246338	0.101256	0.135831	-0.155136	0.130416	0.147626	0.0202822	-0.18943	0.0164465	0.188497	-0.0934743	-0.227708	-0.0995054	0.220742	-0.208946	-0.257429	-0.212563	0.261238
98833-4week-1-D.tif	0.356781	-0.00144856	-0.277821	-0.194517	-0.265858	0.211894	0.245901	-0.106118	0.244032	0.105495	0.130312	-0.154968	0.131284	0.151951	0.015293	-0.19218	0.0197691	0.190395	-0.0985696	-0.229016	-0.0914315	0.224953	-0.209604	-0.272586	-0.200088	0.266146
98834-4week-1-D.tif	0.352827	-0.0148691	-0.275102	-0.178718	-0.272087	0.206891	0.246216	-0.118568	0.240185	0.104189	0.132842	-0.159912	0.128838	0.158284	0.0202898	-0.193001	0.0167053	0.196552	-0.0906174	-0.229639	-0.0948676	0.230589	-0.200214	-0.269932	-0.205016	0.268135
98835-4week-1-D.tif	0.350604	-0.0136812	-0.268223	-0.190983	-0.267514	0.214746	0.246505	-0.122363	0.236687	0.102527	0.132832	-0.161624	0.125046	0.154809	0.0204628	-0.193603	0.0142151	0.196271	-0.0901606	-0.228491	-0.0960728	0.234027	-0.199376	-0.266403	-0.205004	0.274768
98838-4week-1-D.tif	0.333471	0.00250936	-0.25711	-0.220635	-0.244264	0.215875	0.230012	-0.115692	0.2327	0.122364	0.119451	-0.165616	0.127154	0.167793	0.0103465	-0.205505	0.0217216	0.203639	-0.0991731	-0.24082	-0.0817458	0.241774	-0.206107	-0.281701	-0.186456	0.276014
98843-4week-1-D.tif	0.332585	-0.000331202	-0.272971	-0.166656	-0.252497	0.202567	0.232433	-0.128742	0.232551	0.135007	0.122808	-0.172681	0.126335	0.177134	0.0155255	-0.211808	0.0207818	0.206584	-0.092126	-0.246888	-0.0813895	0.238993	-0.196579	-0.293513	-0.187457	0.260334
98847-4week-1-D.tif	0.352414	0.000241302	-0.278979	-0.186907	-0.268377	0.200435	0.242897	-0.108641	0.242942	0.111138	0.129422	-0.160122	0.131618	0.155908	0.0156332	-0.196081	0.0199982	0.188995	-0.0958601	-0.235235	-0.0870864	0.23233	-0.208011	-0.270696	-0.196611	0.268635
98848-4week-1-D.tif	0.378713	-0.0189649	-0.293234	-0.156421	-0.297535	0.203864	0.265172	-0.106597	0.25464	0.0862033	0.147564	-0.154324	0.134911	0.140645	0.0274579	-0.180656	0.0121727	0.173711	-0.0907551	-0.213744	-0.105896	0.216206	-0.208523	-0.246751	-0.224688	0.256829
98850-4week-1-D.tif	0.324057	-0.00301258	-0.248798	-0.214151	-0.234953	0.22645	0.222412	-0.121373	0.226811	0.129579	0.114331	-0.16899	0.120521	0.171393	0.00977427	-0.210689	0.0173085	0.207392	-0.0931813	-0.251777	-0.0824805	0.246445	-0.193922	-0.296604	-0.181881	0.285338
98853-4week-1-D.tif	0.33701	-0.00413894	-0.258435	-0.211647	-0.252231	0.213358	0.233891	-0.118714	0.23084	0.112912	0.123368	-0.165851	0.123193	0.160193	0.0134044	-0.200427	0.0193395	0.206039	-0.0940959	-0.238244	-0.085769	0.244087	-0.199933	-0.279594	-0.190583	0.282026
98859-4week-1-D.tif	0.334219	-0.0106557	-0.263906	-0.174881	-0.249185	0.229855	0.233562	-0.122046	0.229356	0.119079	0.126388	-0.170323	0.122597	0.170036	0.0195479	-0.20922	0.0143723	0.202887	-0.0868014	-0.247971	-0.0917697	0.234867	-0.19145	-0.290882	-0.196929	0.269256
98862-4week-1-D.tif	0.36194	0.00497469	-0.278305	-0.214449	-0.263975	0.211555	0.247865	-0.10072	0.250329	0.10688	0.128067	-0.147542	0.137296	0.152407	0.0097647	-0.185101	0.0218	0.181346	-0.105912	-0.226024	-0.0888736	0.221592	-0.220739	-0.26666	-0.199256	0.261742
98867-4week-1-D.tif	0.33266	-0.014494	-0.25461	-0.180406	-0.245438	0.245902	0.238302	-0.132144	0.221309	0.110252	0.131555	-0.175528	0.113727	0.162933	0.0249161	-0.210199	0.00665028	0.20219	-0.0813847	-0.244752	-0.0983966	0.240507	-0.185842	-0.28309	-0.203448	0.278827
98868-4week-1-D.tif	0.348229	-0.00896227	-0.27001	-0.19292	-0.271013	0.20051	0.242533	-0.116373	0.237662	0.104082	0.132278	-0.167782	0.128633	0.158208	0.0193132	-0.197078	0.0180102	0.197319	-0.0915638	-0.229555	-0.0916706	0.236098	-0.202124	-0.261939	-0.200276	0.278392
98870-4week-1-D.tif	0.351213	-0.000259377	-0.277436	-0.195938	-0.266692	0.195511	0.241851	-0.109381	0.241713	0.108885	0.12754	-0.158273	0.132841	0.160183	0.013223	-0.19291	0.0216961	0.193022	-0.0985312	-0.231472	-0.0853124	0.2341	-0.208583	-0.274243	-0.193521	0.270776
98873-4week-1-D.tif	0.325734	0.0106846	-0.2452	-0.245843	-0.229905	0.22592	0.221758	-0.107131	0.228359	0.12236	0.114738	-0.167892	0.127803	0.171749	0.00383557	-0.20615	0.0247455	0.20748	-0.10397	-0.247798	-0.0779761	0.243038	-0.211068	-0.289133	-0.178856	0.282714
98874-4week-1-D.tif	0.352078	-0.0151703	-0.269644	-0.185189	-0.266327	0.224619	0.245971	-0.113735	0.236473	0.0979274	0.134792	-0.162326	0.124883	0.153068	0.0223059	-0.195488	0.0123636	0.192495	-0.0895044	-0.228445	-0.0983341	0.231191	-0.197672	-0.272194	-0.207385	0.273248
98879-4week-1-D.tif	0.36596	-0.00391202	-0.28645	-0.19127	-0.279376	0.195755	0.252129	-0.103511	0.250567	0.0979302	0.134141	-0.149817	0.135322	0.144469	0.0164172	-0.184355	0.0240395	0.193547	-0.0995566	-0.222208	-0.0916539	0.224462	-0.215338	-0.260011	-0.206201	0.25892
98880-4week-1-D.tif	0.36533	0.00324785	-0.285977	-0.201291	-0.276134	0.193867	0.249658	-0.0968371	0.251048	0.0982673	0.132358	-0.150933	0.138585	0.149594	0.0130575	-0.184636	0.0238375	0.184492	-0.103766	-0.221699	-0.0888754	0.222986	-0.218836	-0.262394	-0.200286	0.265335
98883-4week-1-D.tif	0.362948	0.00841753	-0.281475	-0.212748	-0.270032	0.192532	0.247109	-0.100117	0.251825	0.107876	0.127443	-0.149998	0.137901	0.148994	0.00826112	-0.184724	0.0253195	0.185935	-0.10783	-0.222064	-0.0862353	0.222536	-0.220794	-0.265764	-0.194441	0.269123
98884-4week-1-D.tif	0.335764	-0.00980143	-0.25774	-0.201657	-0.255267	0.213998	0.23523	-0.126507	0.230483	0.115718	0.125213	-0.168833	0.122892	0.164938	0.0176663	-0.205501	0.0161217	0.204193	-0.0902234	-0.237438	-0.0892657	0.242915	-0.196312	-0.273628	-0.194562	0.281604
98889-4week-1-D.tif	0.36321	-0.00634211	-0.288655	-0.181982	-0.287699	0.166777	0.247855	-0.102522	0.250162	0.097876	0.131831	-0.151509	0.13758	0.151049	0.0179101	-0.192601	0.0248134	0.193373	-0.0973782	-0.223199	-0.0879505	0.232066	-0.211692	-0.257149	-0.199987	0.274163
98890-4week-1-D.tif	0.363587	-0.00668016	-0.283187	-0.187271	-0.281724	0.188103	0.251512	-0.109552	0.246429	0.0957892	0.133149	-0.150383	0.132588	0.14757	0.0177846	-0.186756	0.0192543	0.188565	-0.0960793	-0.222681	-0.0925676	0.229071	-0.208493	-0.261727	-0.202253	0.275953
98891-4week-1-D.tif	0.341217	0.00813057	-0.265989	-0.211019	-0.248434	0.218019	0.235621	-0.108758	0.233084	0.113076	0.122817	-0.160613	0.125455	0.157099	0.0109469	-0.200178	0.0200058	0.196259	-0.0982159	-0.242715	-0.0828992	0.238526	-0.206663	-0.284996	-0.186944	0.277169
98894-4week-1-D.tif	0.360431	-0.0065274	-0.283383	-0.17199	-0.274424	0.208695	0.251303	-0.112495	0.244853	0.103988	0.135617	-0.15776	0.130262	0.150776	0.0200637	-0.191271	0.0171895	0.189092	-0.0937279	-0.22818	-0.0953936	0.223282	-0.206057	-0.268592	-0.206734	0.260982
98897-4week-1-D.tif	0.319064	-0.00283985	-0.254215	-0.20454	-0.243052	0.20572	0.216792	-0.117527	0.22601	0.130877	0.114163	-0.174743	0.124476	0.177841	0.01177	-0.217478	0.0235418	0.215102	-0.0908935	-0.255511	-0.0762816	0.251939	-0.193536	-0.293538	-0.177839	0.284698
98898-4week-1-D.tif	0.351374	-0.00432076	-0.274635	-0.203731	-0.268462	0.189193	0.241515	-0.11351	0.244448	0.112532	0.125699	-0.156322	0.134948	0.163124	0.0127097	-0.193644	0.0233975	0.196496	-0.100345	-0.226434	-0.0856632	0.233524	-0.210514	-0.267381	-0.194471	0.270475
98899-4week-1-D.tif	0.340805	-0.0135963	-0.263638	-0.183739	-0.260456	0.219985	0.240783	-0.125316	0.228784	0.105805	0.131599	-0.169486	0.120679	0.160554	0.0231228	-0.205188	0.0129915	0.202516	-0.0869065	-0.233083	-0.0942308	0.24009	-0.192266	-0.276134	-0.201267	0.277592
98902-4week-1-D.tif	0.328295	-0.00167785	-0.259336	-0.198544	-0.244133	0.217976	0.227365	-0.118692	0.225643	0.12042	0.120075	-0.169485	0.121769	0.169495	0.0143639	-0.21119	0.0194041	0.209332	-0.0915884	-0.248702	-0.0826647	0.244733	-0.194578	-0.293753	-0.184615	0.280088
98903-4week-1-D.tif	0.364225	-0.00602901	-0.288914	-0.173062	-0.275511	0.204931	0.251672	-0.106807	0.249945	0.105096	0.133895	-0.150348	0.135099	0.152376	0.017145	-0.186246	0.0207311	0.188192	-0.0972688	-0.228776	-0.0930187	0.220037	-0.211317	-0.271217	-0.206684	0.251854
98905-4week-1-D.tif	0.321445	0.00888861	-0.249839	-0.232992	-0.236841	0.201361	0.218311	-0.116341	0.230382	0.136806	0.111487	-0.17337	0.129428	0.180231	0.00346465	-0.210991	0.0264308	0.2097	-0.10264	-0.247773	-0.0729463	0.247606	-0.206535	-0.288577	-0.172147	0.285451
98908-4week-1-D.tif	0.360027	0.000367956	-0.284653	-0.187254	-0.272004	0.201235	0.249839	-0.108157	0.245816	0.104039	0.132695	-0.153931	0.132522	0.149435	0.0156978	-0.187496	0.0212941	0.189975	-0.0984162	-0.228246	-0.0885638	0.230051	-0.212329	-0.268941	-0.201924	0.258921
98910-4week-1-D.tif	0.346108	-0.00736363	-0.267536	-0.182244	-0.2655	0.21514	0.246678	-0.128984	0.232189	0.107224	0.13482	-0.171545	0.122333	0.158065	0.0229713	-0.201696	0.0115658	0.194132	-0.0877994	-0.231526	-0.0961154	0.234369	-0.197131	-0.263871	-0.202583	0.278299
98915-4week-1-D.tif	0.350568	0.00592115	-0.285021	-0.179572	-0.262999	0.195079	0.240499	-0.108277	0.243212	0.119325	0.124969	-0.155899	0.132689	0.16009	0.0123798	-0.198537	0.0246619	0.195895	-0.100202	-0.237083	-0.0815534	0.231125	-0.209246	-0.286821	-0.189959	0.258753
98916-4week-1-D.tif	0.340651	0.000523836	-0.259138	-0.224398	-0.256258	0.203548	0.234441	-0.113303	0.236495	0.112917	0.122633	-0.16347	0.129997	0.162292	0.0109004	-0.199022	0.0228307	0.201719	-0.0988274	-0.235231	-0.0846701	0.238658	-0.209478	-0.267419	-0.189578	0.283185
98918-4week-1-D.tif	0.321053	0.0127401	-0.245352	-0.250832	-0.237981	0.188303	0.217754	-0.113847	0.229223	0.130424	0.109641	-0.170725	0.130997	0.179117	-0.000412909	-0.206401	0.0296643	0.21243	-0.106302	-0.245588	-0.0684335	0.255499	-0.212004	-0.284693	-0.167847	0.293574
98920-4week-1-D.tif	0.320897	-0.00456741	-0.24684	-0.199416	-0.235958	0.238161	0.227262	-0.129502	0.217509	0.121295	0.122875	-0.179304	0.112718	0.167299	0.0195039	-0.218867	0.0107145	0.207007	-0.0842972	-0.253649	-0.0880656	0.250288	-0.187426	-0.288203	-0.188894	0.289459
98926-4week-1-D.tif	0.360437	-0.0203919	-0.278285	-0.16461	-0.28136	0.212828	0.253326	-0.115743	0.240655	0.0922326	0.140558	-0.160978	0.125617	0.146911	0.026524	-0.190712	0.0112993	0.189295	-0.0861991	-0.224039	-0.101077	0.230937	-0.196899	-0.264752	-0.214595	0.269022
98927-4week-1-D.tif	0.356287	0.000669247	-0.2781	-0.193652	-0.270971	0.200488	0.247785	-0.110385	0.241656	0.10184	0.132109	-0.158333	0.130948	0.153156	0.0168192	-0.19309	0.0182828	0.187488	-0.0969988	-0.227376	-0.0906559	0.229378	-0.208897	-0.265411	-0.198264	0.275228
98928-4week-1-D.tif	0.371119	0.00404287	-0.291316	-0.199617	-0.279015	0.194181	0.25494	-0.0971253	0.254884	0.0967894	0.134403	-0.146305	0.141745	0.150444	0.0131642	-0.180494	0.0238545	0.179264	-0.106006	-0.217749	-0.0901573	0.21805	-0.223583	-0.258277	-0.204031	0.256796
98929-4week-1-D.tif	0.359131	-0.0134106	-0.277292	-0.186053	-0.272653	0.211239	0.248687	-0.11258	0.246425	0.104682	0.133552	-0.156589	0.131811	0.153939	0.0183603	-0.188508	0.0173217	0.190878	-0.0949871	-0.223907	-0.0967291	0.223572	-0.205749	-0.266618	-0.207877	0.263355
98930-4week-1-D.tif	0.356063	-0.00122359	-0.285174	-0.17785	-0.270334	0.197556	0.246202	-0.110354	0.244489	0.109372	0.129272	-0.15248	0.133635	0.158632	0.0157167	-0.193611	0.0220718	0.192862	-0.0969402	-0.234477	-0.0878793	0.226559	-0.209259	-0.275252	-0.197863	0.260267
98935-4week-1-D.tif	0.309265	0.00601047	-0.258873	-0.141491	-0.233095	0.226703	0.22041	-0.135715	0.207328	0.135277	0.119679	-0.187856	0.108559	0.181115	0.0224473	-0.238937	0.0125165	0.21612	-0.077083	-0.276764	-0.0809969	0.250045	-0.174943	-0.318766	-0.175213	0.284257
98936-4week-1-D.tif	0.357747	-0.00163747	-0.281177	-0.19467	-0.272297	0.193352	0.245224	-0.105992	0.246467	0.106005	0.128155	-0.150897	0.134057	0.152637	0.0139712	-0.190533	0.0223398	0.19027	-0.0989257	-0.229759	-0.0868717	0.231459	-0.211468	-0.268881	-0.197222	0.268646
98938-4week-1-D.tif	0.336811	-0.00219319	-0.268698	-0.17807	-0.250475	0.223614	0.235527	-0.118434	0.229377	0.116611	0.127061	-0.170012	0.1231	0.166104	0.0173018	-0.205279	0.0170857	0.202585	-0.0895516	-0.24802	-0.0884844	0.234591	-0.195891	-0.290613	-0.193166	0.269117
98939-4week-1-D.tif	0.334601	0.00307522	-0.261429	-0.208575	-0.250608	0.209281	0.231517	-0.117026	0.232493	0.12143	0.121287	-0.167086	0.126089	0.164669	0.0130818	-0.207873	0.0213987	0.203026	-0.095067	-0.244369	-0.0825358	0.241107	-0.204125	-0.276927	-0.186703	0.279269
98942-4week-1-D.tif	0.363341	0.00401335	-0.281417	-0.214859	-0.278494	0.172739	0.247862	-0.102593	0.251295	0.100126	0.128196	-0.149424	0.139371	0.150577	0.010127	-0.184205	0.0265286	0.189907	-0.105976	-0.218279	-0.0856329	0.229015	-0.220401	-0.255578	-0.1948	0.278561
98943-4week-1-D.tif	0.373986	-0.00859015	-0.295201	-0.167296	-0.282822	0.206336	0.259147	-0.10323	0.253951	0.095763	0.13889	-0.145323	0.136504	0.145791	0.0187198	-0.177258	0.0187751	0.181177	-0.0980335	-0.221588	-0.0969338	0.21584	-0.21362	-0.268966	-0.213363	0.247344
98945-4week-1-D.tif	0.346694	-0.00290658	-0.264716	-0.209318	-0.260647	0.21111	0.242067	-0.117623	0.236783	0.10824	0.128648	-0.16363	0.127291	0.157087	0.0150373	-0.195355	0.0179941	0.196294	-0.0958431	-0.230908	-0.0902786	0.235123	-0.206104	-0.266253	-0.196926	0.278139
98949-4week-1-D.tif	0.354675	-0.00852583	-0.274063	-0.192678	-0.269151	0.210487	0.248207	-0.115837	0.240071	0.10081	0.133419	-0.1593	0.130013	0.157301	0.0185948	-0.191058	0.0163241	0.191516	-0.0943247	-0.22612	-0.0946622	0.228673	-0.205295	-0.265685	-0.203809	0.270418
98950-4week-1-D.tif	0.337477	-0.00370326	-0.258572	-0.216869	-0.254773	0.205974	0.231402	-0.113515	0.233341	0.113035	0.121188	-0.163233	0.127189	0.163715	0.0126957	-0.202851	0.0198396	0.200516	-0.0958169	-0.237739	-0.0834665	0.245384	-0.202425	-0.276673	-0.188079	0.28596
98951-4week-1-D.tif	0.366483	-0.00406121	-0.288711	-0.170857	-0.279352	0.199536	0.254691	-0.112163	0.249877	0.105419	0.135218	-0.15171	0.132588	0.147158	0.0182838	-0.186806	0.0180598	0.184164	-0.0965333	-0.225013	-0.0946454	0.220556	-0.209834	-0.266525	-0.206126	0.260302
98952-4week-1-D.tif	0.373618	-0.00675032	-0.290777	-0.177271	-0.285914	0.200152	0.260356	-0.109904	0.254316	0.0982229	0.139487	-0.149688	0.136245	0.145419	0.0198422	-0.181603	0.0169611	0.177183	-0.0977419	-0.217167	-0.0985517	0.216175	-0.214672	-0.252571	-0.21317	0.257803
98953-4week-1-D.tif	0.380768	-1.42996e-05	-0.308537	-0.152952	-0.288912	0.188628	0.260731	-0.0947074	0.261334	0.0997695	0.136893	-0.136453	0.142437	0.144486	0.0158249	-0.177325	0.0245378	0.178624	-0.103086	-0.224233	-0.0922251	0.209016	-0.220912	-0.274208	-0.208854	0.23937
98955-4week-1-D.tif	0.325988	-0.00905467	-0.255887	-0.183068	-0.238538	0.237035	0.230625	-0.130642	0.221907	0.122332	0.123889	-0.174395	0.11812	0.175004	0.0187308	-0.212756	0.0125539	0.20834	-0.0858662	-0.250931	-0.0913721	0.238996	-0.187557	-0.29629	-0.192595	0.27543
98956-4week-1-D.tif	0.381689	0.0020708	-0.306132	-0.167123	-0.290929	0.180568	0.260778	-0.0988145	0.265478	0.107928	0.13605	-0.140413	0.14409	0.142494	0.01365	-0.175751	0.0249279	0.17398	-0.105344	-0.219401	-0.0912742	0.210719	-0.224607	-0.260053	-0.208377	0.243797
98957-4week-1-D.tif	0.357581	-0.00336956	-0.284441	-0.181056	-0.269661	0.203494	0.246921	-0.109024	0.246667	0.109968	0.130502	-0.153538	0.135023	0.159226	0.016143	-0.193502	0.0222255	0.19281	-0.0985374	-0.229632	-0.0902074	0.222255	-0.210842	-0.272908	-0.201375	0.255277
98959-4week-1-D.tif	0.343031	-0.00292114	-0.264663	-0.211551	-0.263345	0.199058	0.241211	-0.120419	0.233592	0.104818	0.128863	-0.165787	0.129075	0.164082	0.0159296	-0.196919	0.0196838	0.19983	-0.0949581	-0.230935	-0.0869316	0.24181	-0.206754	-0.261667	-0.194735	0.280601
98960-4week-1-D.tif	0.36207	-0.00507107	-0.283486	-0.168536	-0.27006	0.222103	0.255249	-0.117052	0.243808	0.104537	0.136953	-0.153857	0.127963	0.149221	0.0221238	-0.193546	0.0135368	0.184075	-0.0930042	-0.229395	-0.0982325	0.220479	-0.206501	-0.268717	-0.210419	0.255761
98962-4week-1-D.tif	0.355029	0.00404149	-0.270671	-0.222663	-0.26861	0.190417	0.243745	-0.107734	0.246222	0.107514	0.125748	-0.153237	0.135426	0.153836	0.011458	-0.193026	0.0231473	0.188242	-0.103712	-0.224567	-0.085456	0.233776	-0.218298	-0.255901	-0.194029	0.2793
98963-4week-1-D.tif	0.320144	-0.0064258	-0.243958	-0.20449	-0.231186	0.242353	0.228935	-0.136227	0.217352	0.124126	0.122449	-0.179245	0.11266	0.171078	0.0171099	-0.213319	0.00973656	0.208436	-0.0857127	-0.251758	-0.0893403	0.249478	-0.18783	-0.289953	-0.190359	0.285946
98965-4week-1-D.tif	0.322975	-0.0121369	-0.247874	-0.201477	-0.246684	0.222079	0.225461	-0.126466	0.220312	0.115639	0.121858	-0.176641	0.117353	0.170119	0.017791	-0.211697	0.013403	0.209279	-0.0835338	-0.250909	-0.0872281	0.252289	-0.185923	-0.285398	-0.187909	0.295319
98966-4week-1-D.tif	0.342823	-0.0148335	-0.259904	-0.19462	-0.257655	0.230313	0.240765	-0.122669	0.234374	0.109896	0.132332	-0.171788	0.123595	0.160042	0.0208613	-0.200192	0.0122302	0.197094	-0.0887972	-0.232351	-0.0977997	0.233582	-0.196658	-0.268289	-0.206168	0.273815
98967-4week-1-D.tif	0.345294	-0.0173304	-0.267438	-0.171531	-0.261829	0.221963	0.241323	-0.125572	0.236698	0.115503	0.130373	-0.166566	0.123351	0.161561	0.020565	-0.199581	0.0121872	0.197476	-0.0876394	-0.234819	-0.0973775	0.230107	-0.19213	-0.281778	-0.203378	0.270568
98969-4week-1-D.tif	0.359163	-0.00754113	-0.276418	-0.190037	-0.272537	0.210617	0.249625	-0.111889	0.244051	0.101639	0.133677	-0.156119	0.129244	0.148118	0.0182745	-0.18873	0.0155305	0.185894	-0.0939074	-0.227974	-0.0949485	0.228493	-0.206428	-0.263527	-0.205327	0.271058
98973-4week-1-D.tif	0.367458	-0.0135813	-0.27845	-0.192535	-0.277377	0.219635	0.255764	-0.107984	0.248933	0.0936986	0.13869	-0.152107	0.131542	0.143219	0.0214909	-0.185151	0.0140216	0.181327	-0.0950282	-0.21796	-0.101083	0.222273	-0.209958	-0.253986	-0.216004	0.263152
98976-4week-1-D.tif	0.367427	-0.00969028	-0.289286	-0.17058	-0.278581	0.205766	0.254059	-0.107609	0.250979	0.102	0.134453	-0.144909	0.134223	0.148839	0.0181802	-0.183639	0.0181209	0.183515	-0.0957329	-0.228719	-0.0949315	0.220751	-0.209985	-0.270405	-0.208925	0.254681
98981-4week-1-D.tif	0.345764	-0.0151846	-0.257706	-0.209054	-0.259657	0.220468	0.240303	-0.121505	0.236642	0.108609	0.127512	-0.161881	0.123264	0.154469	0.0173632	-0.196811	0.0141671	0.198603	-0.0928447	-0.227206	-0.0947959	0.238002	-0.19842	-0.269728	-0.201593	0.28122
98983-4week-1-D.tif	0.346462	-0.00125823	-0.259771	-0.22598	-0.257188	0.207115	0.240654	-0.119144	0.240033	0.114488	0.124164	-0.160327	0.129953	0.159878	0.00943343	-0.191329	0.0198396	0.195708	-0.101143	-0.228437	-0.0878211	0.235415	-0.211	-0.26528	-0.193615	0.279151
98985-4week-1-D.tif	0.333166	-0.0086336	-0.261364	-0.185967	-0.255882	0.211725	0.235056	-0.130363	0.227557	0.118155	0.125942	-0.171155	0.120001	0.164509	0.0203611	-0.210878	0.0167804	0.209224	-0.0868793	-0.242232	-0.0878449	0.245451	-0.192792	-0.277621	-0.1941	0.277784
98988-4week-1-D.tif	0.352475	0.00400505	-0.279046	-0.193065	-0.252795	0.223492	0.245746	-0.112998	0.242248	0.115825	0.127732	-0.154542	0.132156	0.162306	0.0110329	-0.189141	0.0213399	0.194029	-0.101024	-0.236566	-0.0896717	0.219205	-0.212339	-0.283762	-0.197853	0.251212
98991-4week-1-D.tif	0.365779	-0.00471398	-0.285248	-0.192117	-0.275583	0.198938	0.249497	-0.103775	0.254334	0.10865	0.13036	-0.147993	0.13712	0.148936	0.0131229	-0.184186	0.0231697	0.188058	-0.101864	-0.223372	-0.0917752	0.218917	-0.215291	-0.26579	-0.203622	0.258447
98992-4week-1-D.tif	0.31323	-0.00413904	-0.240289	-0.216542	-0.227265	0.235002	0.219989	-0.129355	0.21596	0.126572	0.116739	-0.179964	0.116135	0.177923	0.0128157	-0.216099	0.017127	0.218816	-0.0885778	-0.256108	-0.0841158	0.250675	-0.189431	-0.295914	-0.182316	0.289132
98993-4week-1-D.tif	0.321741	0.0020161	-0.250512	-0.209715	-0.241004	0.215625	0.225209	-0.125352	0.220312	0.122844	0.119121	-0.176594	0.117522	0.168784	0.0138263	-0.214248	0.0171099	0.209352	-0.089839	-0.251286	-0.0806085	0.253302	-0.193014	-0.288144	-0.179863	0.293415
98994-4week-1-D.tif	0.343871	-0.00616841	-0.257317	-0.211176	-0.259254	0.213595	0.241128	-0.126081	0.2355	0.114068	0.126959	-0.165855	0.122904	0.155018	0.0159183	-0.198921	0.0138481	0.194623	-0.09321	-0.23132	-0.0923277	0.238531	-0.201453	-0.263418	-0.196568	0.287103
98996-4week-1-D.tif	0.339094	-0.00548335	-0.259144	-0.2095	-0.257675	0.211161	0.236131	-0.119121	0.232353	0.110424	0.126259	-0.167895	0.125417	0.161664	0.0159135	-0.201474	0.0177568	0.200848	-0.0923067	-0.237063	-0.0886757	0.24076	-0.201305	-0.268726	-0.193818	0.284406
98999-4week-1-D.tif	0.364536	-0.00476478	-0.286612	-0.181748	-0.277727	0.195887	0.248421	-0.100021	0.249536	0.100712	0.130693	-0.147009	0.133688	0.14544	0.0152168	-0.186384	0.0211734	0.187526	-0.0978646	-0.228526	-0.0911021	0.224004	-0.209424	-0.273708	-0.200534	0.268591
99002-4week-1-D.tif	0.361614	-0.0104559	-0.273257	-0.202792	-0.266463	0.221977	0.24883	-0.108266	0.248201	0.104007	0.130498	-0.148454	0.131024	0.147862	0.0146758	-0.183841	0.0152895	0.183133	-0.0977922	-0.226017	-0.0961515	0.224701	-0.209386	-0.267934	-0.207082	0.26608
99003-4week-1-D.tif	0.34614	-0.0120442	-0.261643	-0.204833	-0.257113	0.225344	0.241905	-0.118601	0.233874	0.103648	0.128377	-0.158475	0.123994	0.157014	0.0182347	-0.197216	0.0137314	0.196379	-0.0923682	-0.231459	-0.0941994	0.236541	-0.199637	-0.273898	-0.201295	0.277602
99006-4week-1-D.tif	0.341847	-0.00783961	-0.26279	-0.20501	-0.256673	0.211868	0.234496	-0.113988	0.235317	0.112135	0.123037	-0.160755	0.125584	0.159318	0.0125694	-0.195647	0.0176371	0.198327	-0.0935073	-0.239185	-0.0866068	0.241878	-0.199065	-0.282554	-0.191846	0.281454
99010-4week-1-D.tif	0.33142	-0.0126159	-0.244988	-0.224647	-0.249665	0.222872	0.23008	-0.122272	0.228725	0.112201	0.122047	-0.167686	0.122346	0.163806	0.0164788	-0.206887	0.0158233	0.205186	-0.0903133	-0.239543	-0.089085	0.248725	-0.197878	-0.268973	-0.194991	0.289835
99011-4week-1-D.tif	0.315744	0.000863467	-0.240817	-0.227455	-0.238937	0.205195	0.2171	-0.124828	0.221109	0.129106	0.112961	-0.178927	0.11989	0.174523	0.00929966	-0.21641	0.0206047	0.215105	-0.0929252	-0.250804	-0.0773063	0.256709	-0.193728	-0.287091	-0.172995	0.304015
99012-4week-1-D.tif	0.330056	-0.00723396	-0.258319	-0.182195	-0.243357	0.231253	0.235264	-0.137409	0.226945	0.12851	0.126431	-0.177481	0.11818	0.170482	0.0184815	-0.209061	0.0130418	0.206726	-0.0877623	-0.24421	-0.0914103	0.238501	-0.191267	-0.286727	-0.196284	0.268844
99016-4week-1-D.tif	0.314983	-0.00944328	-0.239115	-0.201872	-0.220429	0.257162	0.228122	-0.139288	0.206765	0.117386	0.122484	-0.179282	0.105922	0.173043	0.0193201	-0.215964	0.00493121	0.212364	-0.0820299	-0.256151	-0.0915881	0.253905	-0.17988	-0.303489	-0.189484	0.291628
99017-4week-1-D.tif	0.352507	-0.00902657	-0.2704	-0.203889	-0.269307	0.199765	0.242201	-0.115163	0.24709	0.116072	0.127746	-0.159356	0.13252	0.15588	0.0152316	-0.19547	0.0209248	0.194625	-0.0982155	-0.224448	-0.0897109	0.233027	-0.209292	-0.260096	-0.201295	0.26808
99027-4week-1-D.tif	0.328888	-0.0107265	-0.249457	-0.210847	-0.24785	0.220486	0.23087	-0.130444	0.228841	0.122379	0.123874	-0.176722	0.123535	0.173034	0.0158979	-0.207613	0.0163803	0.208216	-0.0910612	-0.238139	-0.0903181	0.241291	-0.195901	-0.273162	-0.1937	0.282248
99028-4week-1-D.tif	0.294594	-9.97199e-05	-0.229122	-0.213591	-0.200484	0.257781	0.209274	-0.135085	0.201267	0.13697	0.110772	-0.188602	0.10518	0.185888	0.0130438	-0.231435	0.0128935	0.227337	-0.0839199	-0.273872	-0.0815079	0.259447	-0.178307	-0.320305	-0.173683	0.295566
99030-4week-1-D.tif	0.36088	0.00243466	-0.287448	-0.183214	-0.277645	0.183001	0.246088	-0.10418	0.251985	0.114131	0.131391	-0.161937	0.13816	0.155755	0.0129339	-0.189844	0.0240811	0.186959	-0.101411	-0.225356	-0.0881447	0.220632	-0.213967	-0.264764	-0.196904	0.266381
99033-4week-1-D.tif	0.305871	-0.0097093	-0.229663	-0.230876	-0.230288	0.218045	0.211639	-0.135015	0.218823	0.137731	0.10897	-0.180557	0.118474	0.184167	0.0115118	-0.223811	0.0202709	0.224738	-0.0897888	-0.254021	-0.0787719	0.260808	-0.189286	-0.288355	-0.177761	0.296856
99035-4week-1-D.tif	0.325924	-0.0263518	-0.247319	-0.173905	-0.243969	0.24686	0.232966	-0.142197	0.221609	0.119014	0.128327	-0.178289	0.112175	0.169639	0.0247307	-0.209683	0.00401697	0.206371	-0.0764937	-0.249109	-0.0997606	0.24536	-0.177151	-0.288394	-0.205056	0.280685
99037-4week-1-D.tif	0.316693	0.00835741	-0.244875	-0.221691	-0.230806	0.220548	0.224612	-0.131239	0.21891	0.13226	0.116812	-0.179817	0.117829	0.175206	0.0110566	-0.217757	0.0185688	0.212547	-0.0946697	-0.250805	-0.079731	0.249488	-0.197968	-0.287715	-0.176433	0.290618
99038-4week-1-D.tif	0.319076	-0.0169734	-0.245232	-0.172703	-0.239351	0.243988	0.228888	-0.143119	0.215853	0.124479	0.126675	-0.186917	0.10933	0.172868	0.0251982	-0.221886	0.00366417	0.207315	-0.076504	-0.252625	-0.0962247	0.247981	-0.175224	-0.291071	-0.196149	0.288664
99039-4week-1-D.tif	0.351425	-0.00704313	-0.276998	-0.17771	-0.259972	0.220277	0.242372	-0.112807	0.24365	0.117786	0.128168	-0.157319	0.129612	0.159082	0.0153594	-0.194456	0.0178555	0.192337	-0.0948954	-0.237811	-0.0917684	0.224778	-0.203676	-0.284236	-0.201132	0.257122
99041-4week-1-D.tif	0.371115	-0.00249561	-0.295238	-0.178661	-0.280736	0.195577	0.253061	-0.0965261	0.25688	0.103	0.133655	-0.145643	0.141585	0.152088	0.0148553	-0.184141	0.0245191	0.184099	-0.103014	-0.222345	-0.0923643	0.211567	-0.218647	-0.266825	-0.20567	0.250306
99043-4week-1-D.tif	0.335868	0.00279502	-0.260016	-0.220107	-0.248769	0.207359	0.230024	-0.112943	0.235436	0.122001	0.119595	-0.165481	0.130436	0.170029	0.00941451	-0.20401	0.0227005	0.200835	-0.100837	-0.237928	-0.0812797	0.239378	-0.207542	-0.279767	-0.185031	0.27784
99047-4week-1-D.tif	0.346716	0.00832962	-0.26658	-0.226618	-0.260405	0.188272	0.237713	-0.111558	0.243698	0.11969	0.121175	-0.158417	0.134236	0.158868	0.00725757	-0.195298	0.0253683	0.193455	-0.104727	-0.231414	-0.0796468	0.239876	-0.217808	-0.263508	-0.186997	0.278322
99057-4week-1-D.tif	0.334338	0.00231285	-0.261217	-0.200706	-0.240473	0.232102	0.232107	-0.116538	0.231036	0.123705	0.122475	-0.167663	0.121682	0.161849	0.013122	-0.20628	0.0179783	0.201944	-0.0940448	-0.248254	-0.0856678	0.23773	-0.200596	-0.29002	-0.190738	0.269817
99061-4week-1-D.tif	0.361663	-0.00126551	-0.282078	-0.184352	-0.278459	0.19573	0.252605	-0.117789	0.250179	0.11424	0.136338	-0.164872	0.132264	0.14725	0.0187045	-0.192498	0.0191301	0.186669	-0.0976797	-0.219738	-0.0932123	0.22581	-0.212643	-0.250526	-0.206812	0.261343
99065-4week-1-D.tif	0.373629	0.000241368	-0.294043	-0.188129	-0.284637	0.189294	0.255527	-0.0986265	0.259061	0.103081	0.13523	-0.147633	0.141041	0.144178	0.0145909	-0.181251	0.02433	0.180848	-0.103919	-0.218037	-0.0914897	0.217201	-0.222028	-0.254717	-0.207294	0.253549
99067-4week-1-D.tif	0.364745	0.000581524	-0.285501	-0.189027	-0.276715	0.195822	0.250889	-0.104477	0.249488	0.102606	0.131986	-0.150276	0.134386	0.147025	0.0152559	-0.187797	0.0203279	0.183419	-0.0998175	-0.224802	-0.0912969	0.222834	-0.213106	-0.265058	-0.20064	0.269149
99070-4week-1-D.tif	0.331685	0.00268303	-0.24892	-0.238215	-0.247627	0.201561	0.22822	-0.118325	0.233216	0.122338	0.117988	-0.16931	0.129213	0.170177	0.00645478	-0.201419	0.0229215	0.204065	-0.101538	-0.236872	-0.0799606	0.246532	-0.209057	-0.27213	-0.182596	0.288915
99074-4week-1-D.tif	0.331473	-0.0104931	-0.255743	-0.188912	-0.239182	0.242815	0.235387	-0.130781	0.224058	0.117877	0.125487	-0.168512	0.11679	0.167433	0.0196687	-0.209486	0.0117174	0.206722	-0.0869821	-0.246143	-0.0944328	0.237247	-0.19035	-0.290908	-0.19789	0.273141
99076-4week-1-D.tif	0.348665	-0.00452115	-0.268352	-0.195831	-0.251738	0.237114	0.245884	-0.118132	0.236793	0.109641	0.132222	-0.162692	0.125692	0.157185	0.0175704	-0.194754	0.0156009	0.195456	-0.0944471	-0.234452	-0.0960522	0.225551	-0.205773	-0.273938	-0.206065	0.259373
99078-4week-1-D.tif	0.360857	0.00618146	-0.289701	-0.194113	-0.277999	0.162855	0.248307	-0.114696	0.254692	0.121951	0.128108	-0.157119	0.142452	0.163063	0.00897845	-0.186408	0.0290173	0.191763	-0.106136	-0.222879	-0.082743	0.224206	-0.222229	-0.255429	-0.193604	0.260624
99080-4week-1-D.tif	0.338868	-0.000964129	-0.266846	-0.190205	-0.249236	0.223284	0.238655	-0.124686	0.232964	0.121641	0.127041	-0.169639	0.125379	0.168093	0.0143677	-0.199233	0.0166301	0.198828	-0.0930683	-0.242829	-0.0890581	0.232412	-0.201012	-0.282673	-0.194685	0.265972
99083-4week-1-D.tif	0.34172	-0.00571487	-0.259705	-0.203812	-0.255605	0.220634	0.237091	-0.116839	0.232273	0.109756	0.12579	-0.163797	0.121529	0.154673	0.0165588	-0.201756	0.0134701	0.194363	-0.0909884	-0.239148	-0.090381	0.240775	-0.197683	-0.276261	-0.194069	0.287126
99085-4week-1-D.tif	0.336719	0.00298162	-0.264996	-0.185919	-0.243104	0.235127	0.236146	-0.120317	0.231803	0.125878	0.126888	-0.172804	0.121639	0.163646	0.0176056	-0.212304	0.0142354	0.195902	-0.0931296	-0.243619	-0.0900853	0.23125	-0.199281	-0.286434	-0.194441	0.266612
99093-4week-1-D.tif	0.348508	-0.000907119	-0.274673	-0.196931	-0.265017	0.199602	0.241381	-0.112003	0.239074	0.108126	0.127535	-0.158794	0.130926	0.159574	0.0145909	-0.195068	0.0213604	0.195913	-0.0959168	-0.235661	-0.085562	0.236553	-0.207651	-0.271544	-0.194556	0.271139
99094-4week-1-D.tif	0.336373	-0.00274368	-0.25207	-0.225173	-0.250167	0.219946	0.235479	-0.119976	0.231558	0.11253	0.126597	-0.17186	0.12604	0.164271	0.0138026	-0.200837	0.0183014	0.202149	-0.0963404	-0.233657	-0.0890065	0.239842	-0.205931	-0.26627	-0.194636	0.281778
99095-4week-1-D.tif	0.306465	-0.00255315	-0.227408	-0.230243	-0.211941	0.254634	0.219523	-0.134245	0.208762	0.127271	0.117451	-0.185019	0.109488	0.177173	0.0141061	-0.221278	0.0106372	0.216348	-0.0886632	-0.257232	-0.084936	0.258977	-0.189011	-0.297109	-0.184473	0.293276
99096-4week-1-D.tif	0.378162	-0.00953487	-0.294177	-0.179326	-0.295229	0.181126	0.260547	-0.105659	0.260136	0.0978238	0.139785	-0.149668	0.139379	0.140608	0.0188421	-0.178207	0.0205287	0.179572	-0.100082	-0.20923	-0.0971398	0.218129	-0.21714	-0.24591	-0.213613	0.260276
99098-4week-1-D.tif	0.331666	-0.000354355	-0.256975	-0.217701	-0.248102	0.208375	0.227904	-0.117275	0.23357	0.124747	0.118661	-0.167243	0.128432	0.170272	0.0110339	-0.207399	0.0233059	0.206653	-0.096918	-0.243076	-0.0811572	0.242782	-0.205162	-0.277226	-0.186259	0.277445
99100-4week-1-D.tif	0.314211	-0.0148647	-0.235691	-0.2154	-0.236417	0.231265	0.220992	-0.13443	0.21632	0.121748	0.117583	-0.177768	0.114103	0.173948	0.0182636	-0.219522	0.0138165	0.21799	-0.0833585	-0.252142	-0.0870898	0.257268	-0.184687	-0.284659	-0.188046	0.296568
99101-4week-1-D.tif	0.350635	-0.00861789	-0.266605	-0.207336	-0.260411	0.217316	0.241519	-0.113681	0.243127	0.112274	0.126613	-0.156288	0.12941	0.155178	0.0142019	-0.193449	0.0188513	0.195213	-0.0971633	-0.230254	-0.0918495	0.230656	-0.207073	-0.269621	-0.201255	0.268609
99104-4week-1-D.tif	0.353881	-0.00524392	-0.281575	-0.153283	-0.27937	0.189265	0.251027	-0.132646	0.239806	0.113936	0.136302	-0.169882	0.125787	0.155452	0.0234931	-0.200534	0.0159079	0.196524	-0.0883419	-0.229884	-0.0946091	0.229516	-0.199009	-0.262528	-0.203299	0.269307
99105-4week-1-D.tif	0.330715	-0.00434149	-0.249702	-0.219096	-0.24276	0.231966	0.230379	-0.117196	0.226571	0.112837	0.124953	-0.17336	0.121551	0.163541	0.0152316	-0.206059	0.0169656	0.20569	-0.0924008	-0.242132	-0.0883351	0.243958	-0.199548	-0.278026	-0.193621	0.28222
99107-4week-1-D.tif	0.338689	-0.0140956	-0.248496	-0.218161	-0.250046	0.235667	0.238073	-0.123685	0.229786	0.106563	0.127812	-0.166502	0.120305	0.157927	0.0184191	-0.200211	0.0101363	0.196544	-0.0896415	-0.234887	-0.0951386	0.243593	-0.197469	-0.268031	-0.202429	0.285279
99108-4week-1-D.tif	0.356347	-0.0167873	-0.273825	-0.191637	-0.276682	0.203273	0.248012	-0.116749	0.244344	0.10185	0.134253	-0.15907	0.130231	0.151515	0.0197446	-0.187615	0.0181198	0.195684	-0.0919332	-0.224622	-0.0942591	0.235204	-0.20483	-0.257335	-0.209521	0.26629
99111-4week-1-D.tif	0.30992	0.000277557	-0.241707	-0.215262	-0.225715	0.231873	0.214205	-0.122391	0.216398	0.131142	0.113776	-0.180655	0.116935	0.178345	0.0132096	-0.224763	0.0198405	0.219652	-0.089495	-0.260276	-0.0796435	0.252443	-0.190169	-0.299698	-0.177556	0.289311
99112-4week-1-D.tif	0.368871	-0.00125914	-0.293337	-0.158523	-0.282489	0.200854	0.255113	-0.10191	0.249559	0.0991502	0.137466	-0.151812	0.132418	0.142761	0.0206263	-0.190433	0.0169454	0.178329	-0.0949524	-0.228712	-0.0947292	0.220052	-0.209026	-0.27029	-0.206465	0.261793
99116-4week-1-D.tif	0.353284	-0.0143262	-0.275896	-0.160254	-0.261507	0.235439	0.248198	-0.118822	0.240068	0.110136	0.135743	-0.16288	0.124858	0.155871	0.0225639	-0.195429	0.0121887	0.19257	-0.0887549	-0.235233	-0.100807	0.22147	-0.197729	-0.282213	-0.21221	0.253671
99117-4week-1-D.tif	0.350522	-0.0089991	-0.274205	-0.182929	-0.263859	0.212237	0.243464	-0.118326	0.241093	0.113114	0.129379	-0.160885	0.129905	0.162492	0.0163204	-0.194366	0.0189599	0.198876	-0.0944196	-0.232123	-0.0944816	0.222069	-0.20244	-0.276738	-0.20024	0.265577
99122-4week-1-D.tif	0.363038	0.001892	-0.287744	-0.208041	-0.278693	0.158641	0.243755	-0.100585	0.256504	0.111898	0.124268	-0.14823	0.144862	0.160914	0.00639073	-0.183572	0.0307029	0.191189	-0.109627	-0.218274	-0.0806795	0.228426	-0.22201	-0.263449	-0.190768	0.269191
99123-4week-1-D.tif	0.341571	-0.00288806	-0.260811	-0.212348	-0.251265	0.223554	0.238522	-0.116369	0.23328	0.109994	0.127233	-0.165508	0.12691	0.163522	0.0144359	-0.19837	0.0170817	0.197487	-0.0961456	-0.234632	-0.0902031	0.234628	-0.204732	-0.274388	-0.195877	0.275318
99124-4week-1-D.tif	0.325822	0.00183157	-0.240706	-0.246124	-0.237399	0.21385	0.219717	-0.112157	0.228991	0.122081	0.110788	-0.164497	0.125292	0.168385	0.00479453	-0.207115	0.0232053	0.20975	-0.10075	-0.245341	-0.0780966	0.250784	-0.204124	-0.286782	-0.177534	0.295334
99125-4week-1-D.tif	0.325709	-0.0134409	-0.240415	-0.204948	-0.236955	0.245497	0.236865	-0.145297	0.214987	0.113721	0.127763	-0.179985	0.108819	0.166248	0.0198846	-0.205864	0.00342483	0.20561	-0.0829423	-0.24243	-0.0980465	0.247359	-0.183321	-0.282315	-0.195773	0.295845
99127-4week-1-D.tif	0.335159	0.00569584	-0.263883	-0.211523	-0.24968	0.207594	0.232722	-0.115055	0.231659	0.117736	0.12299	-0.168642	0.128281	0.168373	0.0112298	-0.203023	0.0230536	0.20432	-0.0978584	-0.241401	-0.0813207	0.23996	-0.206604	-0.279656	-0.185748	0.27562
99128-4week-1-D.tif	0.346599	-0.0139689	-0.267725	-0.178059	-0.248044	0.248908	0.241073	-0.111419	0.234853	0.107811	0.130113	-0.158051	0.12275	0.157682	0.0202897	-0.20029	0.0115989	0.194408	-0.0892962	-0.242437	-0.099212	0.225248	-0.195976	-0.291791	-0.207025	0.261959
99130-4week-1-D.tif	0.367003	-2.28078e-05	-0.28327	-0.20749	-0.269392	0.206132	0.248943	-0.100775	0.25813	0.113676	0.127688	-0.144679	0.140585	0.151032	0.00856809	-0.181008	0.0248644	0.184227	-0.107292	-0.222977	-0.0906602	0.213902	-0.222375	-0.264705	-0.202792	0.252687
99131-4week-1-D.tif	0.332849	0.0059627	-0.263215	-0.211664	-0.245811	0.203892	0.227588	-0.113423	0.231823	0.12367	0.116037	-0.162822	0.127757	0.170155	0.00820742	-0.206315	0.0245618	0.207296	-0.0993771	-0.245198	-0.078479	0.239868	-0.203468	-0.291823	-0.178473	0.280404
99133-4week-1-D.tif	0.355049	-0.00495244	-0.278762	-0.188066	-0.27146	0.200803	0.244777	-0.108391	0.243566	0.105293	0.130575	-0.156834	0.131941	0.154459	0.0174535	-0.195591	0.0208698	0.194029	-0.095881	-0.229734	-0.0903518	0.228952	-0.207583	-0.268065	-0.200194	0.268099
99135-4week-1-D.tif	0.342072	-0.0100503	-0.267603	-0.17935	-0.249629	0.234966	0.239591	-0.119393	0.231829	0.112386	0.128615	-0.163351	0.122733	0.163517	0.018172	-0.199162	0.0132187	0.198171	-0.0898094	-0.242214	-0.0937596	0.231755	-0.195074	-0.292455	-0.200355	0.26518
99137-4week-1-D.tif	0.362489	-0.00188915	-0.290655	-0.163793	-0.267429	0.214333	0.251967	-0.109752	0.246457	0.10808	0.132716	-0.148745	0.133255	0.157248	0.0160836	-0.186968	0.0188017	0.186999	-0.0981926	-0.231996	-0.0930438	0.215815	-0.20918	-0.287352	-0.203269	0.248019
99138-4week-1-D.tif	0.317426	0.00520965	-0.245071	-0.226631	-0.227075	0.227972	0.218134	-0.116773	0.220468	0.127061	0.111669	-0.169619	0.119993	0.174131	0.00867654	-0.216148	0.020138	0.211383	-0.0946334	-0.257999	-0.0768756	0.252163	-0.19737	-0.299617	-0.17548	0.288868
99139-4week-1-D.tif	0.341907	-0.00485037	-0.253948	-0.227298	-0.247963	0.233157	0.238106	-0.113766	0.235397	0.109111	0.127374	-0.163853	0.126551	0.15773	0.0147116	-0.198292	0.0176803	0.198041	-0.0975917	-0.232569	-0.0907579	0.238146	-0.209501	-0.266703	-0.201966	0.271149
99140-4week-1-D.tif	0.340171	-0.00884407	-0.261521	-0.18474	-0.247758	0.236952	0.242022	-0.13128	0.228944	0.115586	0.129099	-0.166848	0.11813	0.161711	0.0198045	-0.203089	0.00960806	0.197966	-0.0885884	-0.239048	-0.0964746	0.23318	-0.193188	-0.284388	-0.200247	0.272843
99142-4week-1-D.tif	0.33779	-0.000146653	-0.263735	-0.198133	-0.246534	0.225497	0.237262	-0.120487	0.22889	0.114995	0.126025	-0.167286	0.121667	0.162593	0.0149216	-0.201858	0.0161331	0.201162	-0.0941057	-0.239782	-0.0874109	0.238948	-0.198929	-0.288464	-0.191974	0.272962
99143-4week-1-D.tif	0.328871	-0.0129438	-0.250304	-0.195956	-0.242594	0.242498	0.23402	-0.129355	0.221631	0.112404	0.128709	-0.17709	0.116864	0.167632	0.0215555	-0.209405	0.00930549	0.203851	-0.0840505	-0.245194	-0.0952164	0.242727	-0.189018	-0.280785	-0.199774	0.281618
99145-4week-1-D.tif	0.327964	0.000220579	-0.253085	-0.213628	-0.239266	0.225498	0.228459	-0.120495	0.224914	0.119456	0.119309	-0.168254	0.121013	0.16792	0.0121315	-0.207605	0.0184614	0.207923	-0.0926265	-0.249863	-0.0840794	0.243971	-0.197992	-0.288533	-0.185203	0.28339
99148-4week-1-D.tif	0.373393	-0.0195847	-0.286015	-0.175776	-0.28517	0.213077	0.256736	-0.101581	0.254468	0.0930644	0.138443	-0.144591	0.133161	0.138849	0.0211622	-0.179642	0.0146741	0.179032	-0.0937307	-0.220665	-0.101957	0.218497	-0.207957	-0.261538	-0.217206	0.260859
99150-4week-1-D.tif	0.348091	-0.0104196	-0.261816	-0.211225	-0.257382	0.225644	0.24273	-0.117501	0.238959	0.108001	0.129979	-0.162488	0.127174	0.156211	0.0160775	-0.192958	0.0172743	0.198547	-0.0957611	-0.227666	-0.0948352	0.231603	-0.205608	-0.266661	-0.204883	0.268914
99151-4week-1-D.tif	0.375897	-0.00580313	-0.290084	-0.197015	-0.294453	0.172712	0.259129	-0.102612	0.255652	0.0861249	0.137629	-0.144829	0.138994	0.139851	0.0181154	-0.178917	0.0209773	0.179289	-0.100887	-0.209123	-0.093544	0.228547	-0.218577	-0.242633	-0.208848	0.274408
99152-4week-1-D.tif	0.371568	-0.00329359	-0.289797	-0.195622	-0.29002	0.171575	0.255261	-0.103404	0.255002	0.0938355	0.135537	-0.149568	0.138935	0.142449	0.015327	-0.178754	0.0241758	0.18715	-0.101685	-0.213736	-0.0905751	0.228404	-0.218504	-0.248669	-0.205225	0.269632
99154-4week-1-D.tif	0.353726	0.000523821	-0.276211	-0.195794	-0.260532	0.216166	0.246848	-0.112863	0.240558	0.107566	0.130046	-0.156114	0.129958	0.156637	0.0147599	-0.191873	0.0187179	0.19169	-0.0986239	-0.23049	-0.090864	0.226137	-0.209334	-0.275223	-0.199048	0.263636
99157-4week-1-D.tif	0.341607	0.0032912	-0.257438	-0.224477	-0.250783	0.21775	0.236671	-0.115304	0.237853	0.118428	0.124347	-0.16627	0.128534	0.160114	0.0106356	-0.198985	0.0201723	0.196688	-0.0999348	-0.235161	-0.087771	0.233087	-0.211213	-0.266932	-0.19268	0.277771
99158-4week-1-D.tif	0.349307	-0.00934056	-0.273409	-0.170573	-0.268405	0.212718	0.24605	-0.121859	0.23471	0.105447	0.13454	-0.167812	0.123225	0.155107	0.0223546	-0.198669	0.0136589	0.19606	-0.0879918	-0.232842	-0.0952553	0.232779	-0.195958	-0.274014	-0.202826	0.273
99159-4week-1-D.tif	0.339335	0.00323699	-0.267794	-0.186828	-0.253594	0.220617	0.243516	-0.125698	0.223834	0.105122	0.132423	-0.172225	0.119309	0.159895	0.0207172	-0.205162	0.0157588	0.204741	-0.090254	-0.237859	-0.0908346	0.236398	-0.198009	-0.278713	-0.194407	0.276475
99160-4week-1-D.tif	0.365355	-0.00663988	-0.287595	-0.176559	-0.279128	0.201346	0.251575	-0.105437	0.252376	0.106362	0.135356	-0.15546	0.136323	0.151354	0.018214	-0.189298	0.0206376	0.18634	-0.0980526	-0.222872	-0.0946988	0.21792	-0.212264	-0.262438	-0.208099	0.255382
99161-4week-1-D.tif	0.363859	0.00805374	-0.283684	-0.211073	-0.27422	0.187343	0.2505	-0.103909	0.252011	0.105165	0.12981	-0.149538	0.139636	0.151475	0.0113969	-0.18707	0.0262044	0.187184	-0.106637	-0.220841	-0.0867936	0.222726	-0.224135	-0.254436	-0.197948	0.26492
99162-4week-1-D.tif	0.325701	0.00989605	-0.252289	-0.237313	-0.243177	0.194878	0.224764	-0.116946	0.229926	0.12552	0.116194	-0.171656	0.130774	0.176843	0.00574206	-0.207071	0.0288523	0.213993	-0.103306	-0.241862	-0.0745064	0.246586	-0.212205	-0.276592	-0.17647	0.283724
99163-4week-1-D.tif	0.340202	-0.00937487	-0.260015	-0.199346	-0.247798	0.237592	0.239156	-0.120384	0.231026	0.110166	0.128713	-0.165593	0.122982	0.162338	0.0186057	-0.20207	0.0145973	0.20128	-0.091113	-0.238404	-0.0953945	0.232004	-0.198899	-0.278411	-0.202063	0.270203
99165-4week-1-D.tif	0.341119	-0.00133437	-0.26485	-0.207696	-0.248525	0.224571	0.236123	-0.111871	0.2354	0.114978	0.124744	-0.161818	0.129038	0.166428	0.0138929	-0.20191	0.0180324	0.194676	-0.0977838	-0.237456	-0.0866678	0.235444	-0.206022	-0.281454	-0.194502	0.267443
99166-4week-1-D.tif	0.357214	-0.0039747	-0.278901	-0.172548	-0.277142	0.203743	0.25455	-0.12753	0.240979	0.1062	0.13944	-0.169611	0.127705	0.153281	0.0234219	-0.195767	0.0151719	0.19181	-0.0905475	-0.225373	-0.0987884	0.222559	-0.204866	-0.251055	-0.208237	0.268266
99169-4week-1-D.tif	0.324185	-0.0137563	-0.25362	-0.169263	-0.245416	0.234284	0.231057	-0.136116	0.21884	0.12062	0.127894	-0.183667	0.113404	0.171606	0.0241051	-0.217899	0.00846298	0.208188	-0.0797625	-0.249296	-0.0935531	0.245136	-0.180024	-0.291924	-0.195572	0.282086
99172-4week-1-D.tif	0.359718	-0.00203555	-0.276659	-0.20421	-0.271193	0.201271	0.24794	-0.108213	0.246728	0.10372	0.130515	-0.153972	0.133262	0.150518	0.0137326	-0.187066	0.0203764	0.188662	-0.10036	-0.223399	-0.0912967	0.226385	-0.212547	-0.263253	-0.200216	0.271591
99174-4week-1-D.tif	0.325158	-0.00763614	-0.252045	-0.218366	-0.246113	0.208883	0.226358	-0.124554	0.226803	0.119896	0.119219	-0.171011	0.128632	0.182728	0.0129377	-0.208486	0.0224482	0.214204	-0.0941784	-0.24194	-0.0827966	0.245311	-0.19985	-0.279183	-0.186574	0.280155
99175-4week-1-D.tif	0.357807	0.00482381	-0.281437	-0.197734	-0.266234	0.205384	0.246712	-0.105288	0.2468	0.109759	0.129995	-0.155181	0.134493	0.153617	0.0130016	-0.19057	0.0219015	0.186708	-0.101846	-0.228877	-0.0875131	0.225924	-0.215431	-0.269327	-0.198249	0.26076
99182-4week-1-D.tif	0.366379	-0.0121415	-0.285865	-0.168891	-0.288032	0.190443	0.255617	-0.112484	0.245503	0.0913405	0.138404	-0.153181	0.129421	0.142631	0.0226913	-0.185928	0.0151513	0.185708	-0.0909933	-0.221887	-0.0962492	0.231621	-0.203446	-0.26129	-0.208582	0.274059
99183-4week-1-D.tif	0.333599	-0.0112466	-0.245747	-0.224813	-0.249376	0.224403	0.231061	-0.121111	0.230575	0.113572	0.123638	-0.170684	0.121321	0.159544	0.0144405	-0.201823	0.0155479	0.204042	-0.0920386	-0.236696	-0.0893332	0.248158	-0.198089	-0.271414	-0.1956	0.288069
99184-4week-1-D.tif	0.335653	-0.0034959	-0.258602	-0.206949	-0.250361	0.218315	0.233853	-0.119639	0.230158	0.115201	0.124898	-0.170104	0.123925	0.165043	0.0145144	-0.202892	0.0168979	0.201361	-0.0932982	-0.239323	-0.0872594	0.241178	-0.199152	-0.279618	-0.191227	0.280924
99185-4week-1-D.tif	0.346826	-0.00796019	-0.257647	-0.221172	-0.25488	0.224119	0.240505	-0.11518	0.236288	0.105055	0.125255	-0.155398	0.124988	0.153109	0.014138	-0.194077	0.0160157	0.195863	-0.0958025	-0.232319	-0.0916778	0.238096	-0.205035	-0.270313	-0.198974	0.280177
99187-4week-1-D.tif	0.342954	0.00445969	-0.270335	-0.194836	-0.253348	0.219022	0.242161	-0.119106	0.232745	0.112952	0.129439	-0.166929	0.126493	0.163475	0.0165312	-0.202225	0.0182026	0.197362	-0.0955521	-0.237239	-0.0888708	0.230797	-0.205768	-0.27583	-0.194653	0.268098
99188-4week-1-D.tif	0.341725	-0.0113301	-0.259612	-0.204648	-0.256059	0.223471	0.24002	-0.123753	0.23575	0.113641	0.1304	-0.171308	0.12779	0.166998	0.0185822	-0.201599	0.0156849	0.199398	-0.0939282	-0.227618	-0.0953288	0.231351	-0.201953	-0.265634	-0.20307	0.27103
99192-4week-1-D.tif	0.32686	0.000924229	-0.252483	-0.215668	-0.240389	0.226209	0.228925	-0.119942	0.224986	0.118597	0.122416	-0.173175	0.123221	0.170604	0.0144794	-0.210591	0.0190311	0.207187	-0.0927182	-0.247715	-0.0845758	0.243521	-0.20128	-0.27992	-0.188473	0.279971
99193-4week-1-D.tif	0.341815	-0.00785997	-0.272931	-0.163005	-0.257755	0.221581	0.239234	-0.118046	0.231528	0.112749	0.130501	-0.168689	0.123097	0.163526	0.0209819	-0.205427	0.0148223	0.199438	-0.0880984	-0.242044	-0.0911209	0.234445	-0.193471	-0.291788	-0.198602	0.265119
99194-4week-1-D.tif	0.348826	-0.00428589	-0.272013	-0.200623	-0.266604	0.201067	0.240888	-0.110502	0.239943	0.10631	0.129629	-0.163903	0.132418	0.16205	0.0154332	-0.19518	0.0208409	0.195887	-0.0966415	-0.229607	-0.0886172	0.232871	-0.207239	-0.267404	-0.196864	0.273319
99201-4week-1-D.tif	0.373106	-0.00337309	-0.298046	-0.16686	-0.285217	0.190687	0.255102	-0.0974273	0.256643	0.101206	0.135496	-0.146134	0.139838	0.148427	0.0166874	-0.184082	0.0225955	0.18147	-0.101036	-0.221716	-0.0929404	0.213955	-0.215847	-0.269038	-0.206382	0.252886
99205-4week-1-D.tif	0.352873	-0.00530768	-0.275045	-0.187759	-0.267138	0.207085	0.246589	-0.11949	0.241696	0.111358	0.131841	-0.163485	0.129987	0.159444	0.0167592	-0.193036	0.0175347	0.193058	-0.0958559	-0.226683	-0.0932597	0.226086	-0.205208	-0.269039	-0.200774	0.267769
99210-4week-1-D.tif	0.335476	-0.0181765	-0.254838	-0.178118	-0.250908	0.244248	0.241582	-0.135101	0.22237	0.107038	0.135528	-0.179909	0.113821	0.161436	0.0267818	-0.206595	0.00512657	0.201175	-0.0805481	-0.237564	-0.101515	0.239966	-0.184847	-0.277099	-0.208029	0.278699
99213-4week-1-D.tif	0.375337	-0.00767624	-0.29569	-0.164333	-0.286177	0.203309	0.260262	-0.102897	0.254584	0.0954941	0.140295	-0.147288	0.13635	0.144286	0.0212162	-0.183966	0.0175458	0.178059	-0.0979555	-0.216952	-0.0983603	0.214591	-0.213352	-0.263683	-0.214056	0.251057
99215-4week-1-D.tif	0.366287	-0.00742894	-0.283832	-0.179766	-0.26982	0.224298	0.255523	-0.108908	0.246706	0.0986098	0.136629	-0.149978	0.13074	0.147956	0.0186942	-0.183763	0.0145766	0.18267	-0.096791	-0.223742	-0.0993907	0.216536	-0.208796	-0.273133	-0.210526	0.256647
99222-4week-1-D.tif	0.344781	0.00553249	-0.276166	-0.198025	-0.26094	0.196194	0.236032	-0.104349	0.237634	0.109888	0.12453	-0.160072	0.132117	0.162258	0.0126176	-0.200204	0.0249434	0.199335	-0.0981291	-0.239944	-0.0812467	0.236091	-0.208597	-0.279594	-0.187577	0.272891
99224-4week-1-D.tif	0.376158	-0.0123084	-0.295143	-0.16395	-0.290347	0.198016	0.261012	-0.104113	0.254114	0.090501	0.141296	-0.147426	0.136465	0.144581	0.0212222	-0.177632	0.0170179	0.179205	-0.0960061	-0.216875	-0.0995531	0.216159	-0.211327	-0.262189	-0.214909	0.256032
99232-4week-1-D.tif	0.324849	0.00120107	-0.242601	-0.237362	-0.239227	0.214186	0.223427	-0.118883	0.225586	0.120255	0.114812	-0.169342	0.12361	0.170788	0.00837112	-0.209159	0.0214698	0.211426	-0.0978797	-0.244052	-0.0815035	0.247417	-0.201643	-0.28272	-0.17927	0.296245
99233-4week-1-D.tif	0.32725	-0.00453455	-0.246941	-0.21233	-0.237549	0.237728	0.231831	-0.127236	0.220703	0.115354	0.123738	-0.173212	0.116071	0.165864	0.0180561	-0.213177	0.0120081	0.205569	-0.0897662	-0.243769	-0.0906599	0.244651	-0.193468	-0.282999	-0.191272	0.288093
99235-4week-1-D.tif	0.337549	0.00268364	-0.253282	-0.234772	-0.246018	0.214886	0.232152	-0.112694	0.23398	0.115203	0.119493	-0.161621	0.128016	0.163422	0.00860987	-0.200548	0.0219518	0.202348	-0.102428	-0.23491	-0.083271	0.240943	-0.209645	-0.276945	-0.187108	0.282006
99238-4week-1-D.tif	0.328668	-0.000154061	-0.261081	-0.18508	-0.243929	0.227226	0.232777	-0.125236	0.22134	0.117192	0.125556	-0.174179	0.1178	0.1675	0.0191059	-0.213486	0.0156305	0.207894	-0.0870356	-0.251237	-0.0871179	0.241965	-0.192262	-0.290151	-0.189452	0.277746
99239-4week-1-D.tif	0.326775	-0.00702794	-0.248966	-0.206137	-0.239736	0.237076	0.232583	-0.129543	0.220765	0.115388	0.125533	-0.174973	0.116211	0.166412	0.018939	-0.210621	0.0123636	0.207005	-0.0870957	-0.246055	-0.0901624	0.247008	-0.192641	-0.281324	-0.194568	0.282793
99240-4week-1-D.tif	0.310995	-0.00376996	-0.250613	-0.177344	-0.228708	0.237648	0.221404	-0.13528	0.21255	0.131815	0.120047	-0.185138	0.11382	0.183529	0.0190993	-0.225336	0.0133049	0.216305	-0.0813997	-0.265366	-0.0851328	0.248117	-0.181453	-0.305262	-0.183913	0.280082
99246-4week-1-D.tif	0.350523	0.000440682	-0.269826	-0.208717	-0.260223	0.214122	0.244777	-0.11362	0.23937	0.107164	0.129192	-0.158145	0.12915	0.154613	0.0150456	-0.194476	0.0195276	0.193974	-0.0982388	-0.230495	-0.0891746	0.232989	-0.211064	-0.266363	-0.199058	0.268514
99247-4week-1-D.tif	0.348751	-0.00289758	-0.267436	-0.207494	-0.258983	0.211329	0.242047	-0.118271	0.241654	0.11643	0.126503	-0.160779	0.129789	0.159287	0.0123427	-0.193324	0.0198564	0.196539	-0.0990655	-0.229661	-0.0902199	0.228957	-0.208353	-0.270018	-0.196885	0.269903
99248-4week-1-D.tif	0.371706	-0.00974476	-0.292911	-0.160366	-0.282162	0.206128	0.256975	-0.106355	0.253657	0.102216	0.13713	-0.14658	0.134767	0.14686	0.0192212	-0.182409	0.0167278	0.179283	-0.0960879	-0.225181	-0.0979474	0.214464	-0.209884	-0.271409	-0.211192	0.253094
99250-4week-1-D.tif	0.371884	0.000648172	-0.285978	-0.196832	-0.277609	0.203168	0.258703	-0.110012	0.253499	0.101762	0.134995	-0.146619	0.134922	0.142259	0.0143921	-0.178792	0.018572	0.178564	-0.102827	-0.21655	-0.0953568	0.217376	-0.218197	-0.257086	-0.206999	0.262112
99251-4week-1-D.tif	0.352101	-0.018416	-0.266013	-0.194395	-0.266529	0.218579	0.246832	-0.125454	0.240631	0.107588	0.131857	-0.160052	0.12662	0.157127	0.0188429	-0.189615	0.012586	0.193004	-0.0912786	-0.225689	-0.0984961	0.230738	-0.199573	-0.265652	-0.207579	0.272238
99252-4week-1-D.tif	0.353307	-0.00658446	-0.265381	-0.218273	-0.264018	0.208276	0.243843	-0.114718	0.244347	0.109078	0.126704	-0.155032	0.131299	0.154427	0.0125406	-0.189862	0.0200078	0.194623	-0.100222	-0.224188	-0.0915491	0.23043	-0.210973	-0.26221	-0.199905	0.274033
99253-4week-1-D.tif	0.366814	-0.0150169	-0.283206	-0.183376	-0.280443	0.207334	0.25453	-0.10862	0.248829	0.0944935	0.136713	-0.148592	0.132677	0.146531	0.0205699	-0.184103	0.0167741	0.186321	-0.0950014	-0.219426	-0.0974075	0.225476	-0.208333	-0.261964	-0.212515	0.260942
99257-4week-1-D.tif	0.372629	-0.0030587	-0.2887	-0.190236	-0.286205	0.189706	0.257713	-0.107368	0.255842	0.100643	0.137304	-0.151771	0.137373	0.142902	0.0171842	-0.182418	0.0205473	0.181111	-0.101506	-0.212609	-0.0952635	0.218966	-0.217826	-0.248885	-0.209093	0.263017
99260-4week-1-D.tif	0.369769	-0.00783612	-0.285555	-0.191262	-0.283749	0.192451	0.253844	-0.106346	0.255003	0.102189	0.134395	-0.149562	0.136053	0.142899	0.0160914	-0.18187	0.0210961	0.185724	-0.099931	-0.216976	-0.0945354	0.221728	-0.214533	-0.255171	-0.207949	0.264033
99261-4week-1-D.tif	0.325437	0.00483675	-0.246246	-0.242983	-0.23738	0.210033	0.222094	-0.114668	0.230682	0.126217	0.113028	-0.166975	0.129711	0.17569	0.00441312	-0.205997	0.0269435	0.212723	-0.102922	-0.244435	-0.0768208	0.245756	-0.209941	-0.282739	-0.178997	0.282541
99263-4week-1-D.tif	0.359802	-0.00908456	-0.277778	-0.192057	-0.267143	0.221852	0.248949	-0.105745	0.245139	0.099958	0.134944	-0.157481	0.131376	0.150582	0.0164076	-0.183179	0.0183422	0.191243	-0.0968878	-0.225494	-0.0961148	0.222813	-0.20844	-0.27185	-0.208596	0.258444
99267-4week-1-D.tif	0.358997	-0.0125309	-0.273504	-0.183514	-0.279625	0.202374	0.25247	-0.122693	0.241331	0.0992495	0.136976	-0.162693	0.125475	0.146357	0.0222141	-0.190369	0.0122738	0.188505	-0.0899006	-0.221315	-0.0993473	0.230093	-0.200197	-0.255787	-0.207164	0.282322
99272-4week-1-D.tif	0.302857	-0.0140392	-0.238382	-0.163756	-0.224326	0.253295	0.220146	-0.147156	0.199505	0.125269	0.12414	-0.197746	0.101451	0.181917	0.0264309	-0.23234	0.00329176	0.22089	-0.0708464	-0.266753	-0.0926679	0.256941	-0.164285	-0.312306	-0.187314	0.295784
99273-4week-1-D.tif	0.344757	0.0100437	-0.269385	-0.216857	-0.255704	0.199997	0.238509	-0.110595	0.238087	0.114305	0.124038	-0.161629	0.131714	0.162179	0.00950095	-0.197385	0.0235395	0.195635	-0.10347	-0.232546	-0.0816187	0.235582	-0.21338	-0.274198	-0.186588	0.275469
99275-4week-1-D.tif	0.357635	-0.00369118	-0.281638	-0.177913	-0.270432	0.208012	0.249579	-0.114486	0.243073	0.106471	0.133	-0.15618	0.128798	0.150108	0.018028	-0.190844	0.018474	0.192335	-0.0944394	-0.231321	-0.0922908	0.227505	-0.206476	-0.271684	-0.203311	0.26169
99278-4week-1-D.tif	0.324609	0.00675586	-0.25988	-0.201132	-0.243353	0.207342	0.227597	-0.124519	0.223709	0.126542	0.120316	-0.176431	0.121559	0.171987	0.0133919	-0.21437	0.0215195	0.211992	-0.0937028	-0.247756	-0.0786926	0.247385	-0.197604	-0.289217	-0.179469	0.281422
99280-4week-1-D.tif	0.346899	-0.000419256	-0.277577	-0.184797	-0.264459	0.194499	0.239884	-0.11588	0.240164	0.117552	0.127147	-0.165156	0.131948	0.166624	0.0129458	-0.194908	0.0213973	0.196054	-0.096745	-0.235275	-0.0851365	0.232335	-0.204961	-0.279193	-0.191508	0.268565
99281-4week-1-D.tif	0.347867	-0.000354177	-0.277667	-0.182421	-0.262188	0.209449	0.240294	-0.109543	0.2401	0.114152	0.128698	-0.162489	0.130496	0.160337	0.0168922	-0.202245	0.0215349	0.197094	-0.0953782	-0.237721	-0.0875942	0.229313	-0.206155	-0.277166	-0.196901	0.261594
99282-4week-1-D.tif	0.354526	-0.0117497	-0.269551	-0.198777	-0.265915	0.219342	0.248051	-0.117223	0.240386	0.101598	0.13319	-0.159043	0.128043	0.153887	0.0180151	-0.188531	0.0154432	0.193344	-0.0941178	-0.225313	-0.096966	0.228421	-0.204474	-0.265681	-0.206629	0.269725
99283-4week-1-D.tif	0.381155	-0.015671	-0.300626	-0.146313	-0.297925	0.194405	0.263294	-0.098866	0.259207	0.0916603	0.143724	-0.146053	0.13744	0.138436	0.0238894	-0.180205	0.0176655	0.177763	-0.0947483	-0.217257	-0.101197	0.213442	-0.211877	-0.260444	-0.220003	0.249103
99286-4week-1-D.tif	0.338197	0.00760756	-0.266703	-0.21295	-0.250568	0.199415	0.229518	-0.108364	0.236362	0.122024	0.117066	-0.160309	0.129844	0.164618	0.00706864	-0.201997	0.0251959	0.201989	-0.101021	-0.242976	-0.0781188	0.238912	-0.207013	-0.287851	-0.179826	0.279881
99287-4week-1-D.tif	0.342852	-0.0179486	-0.265326	-0.174367	-0.247965	0.248662	0.242352	-0.121778	0.230563	0.107074	0.131817	-0.161196	0.121434	0.162937	0.0226468	-0.200168	0.0102841	0.198612	-0.0859196	-0.242875	-0.0999149	0.229625	-0.192945	-0.289108	-0.209879	0.260532
99290-4week-1-D.tif	0.353263	-0.00361861	-0.272925	-0.20211	-0.259276	0.218801	0.243163	-0.109276	0.244536	0.112522	0.127492	-0.15461	0.130951	0.154722	0.0130623	-0.191237	0.0197336	0.1918	-0.0993388	-0.231314	-0.0899669	0.228302	-0.21002	-0.274968	-0.200675	0.260987
99293-4week-1-D.tif	0.371872	-0.0056852	-0.288135	-0.187344	-0.280802	0.204755	0.25642	-0.102184	0.252867	0.0952274	0.135644	-0.143832	0.135023	0.141417	0.0172937	-0.180936	0.0184073	0.179405	-0.098994	-0.221132	-0.0955962	0.220312	-0.214623	-0.261154	-0.209378	0.261149
99294-4week-1-D.tif	0.381131	-0.013818	-0.296371	-0.167544	-0.290443	0.206308	0.262495	-0.0977287	0.258599	0.0899786	0.140786	-0.138888	0.136324	0.135222	0.0202389	-0.173005	0.0160986	0.172816	-0.0967038	-0.219282	-0.100187	0.21575	-0.213787	-0.262339	-0.218181	0.252531
99297-4week-1-D.tif	0.340547	0.00415874	-0.27125	-0.193613	-0.249147	0.216303	0.234207	-0.110774	0.235083	0.120443	0.121971	-0.160793	0.126801	0.163185	0.0113643	-0.201356	0.0197825	0.196139	-0.0967382	-0.245542	-0.0823742	0.236622	-0.202975	-0.29357	-0.187272	0.268799
99299-4week-1-D.tif	0.35482	-0.0157568	-0.277321	-0.161581	-0.270164	0.221559	0.250712	-0.123231	0.239754	0.105866	0.137339	-0.162726	0.126165	0.15673	0.0241985	-0.194737	0.012303	0.192114	-0.0879647	-0.230167	-0.0994037	0.226651	-0.198142	-0.272487	-0.212296	0.257766
99300-4week-1-D.tif	0.297525	-0.010485	-0.217043	-0.230369	-0.211359	0.254452	0.21062	-0.13704	0.203943	0.1279	0.11364	-0.190545	0.106727	0.181828	0.0157292	-0.228926	0.0100666	0.224578	-0.0828904	-0.262449	-0.0875299	0.262427	-0.178799	-0.299904	-0.180629	0.308533
99306-4week-1-D.tif	0.321852	0.00499171	-0.248615	-0.228538	-0.23611	0.207393	0.224159	-0.128996	0.230244	0.140781	0.114011	-0.174837	0.127743	0.182421	0.00564672	-0.209873	0.0233491	0.209741	-0.101203	-0.244264	-0.0769987	0.245517	-0.205927	-0.282784	-0.178151	0.278447
99308-4week-1-D.tif	0.361204	0.022177	-0.295317	-0.169776	-0.265145	0.207247	0.257352	-0.115554	0.242572	0.110683	0.135882	-0.158603	0.131887	0.154414	0.0157201	-0.192863	0.0198863	0.181712	-0.102243	-0.23058	-0.0882345	0.216166	-0.217112	-0.275672	-0.196452	0.250648
99309-4week-1-D.tif	0.31693	0.0101574	-0.244321	-0.243633	-0.230352	0.203945	0.217605	-0.119716	0.225549	0.13494	0.107524	-0.168229	0.127719	0.182723	0.00321487	-0.213999	0.0276316	0.215848	-0.10351	-0.250387	-0.070277	0.253272	-0.208076	-0.291021	-0.169638	0.2861
99310-4week-1-D.tif	0.347271	0.00452784	-0.271113	-0.206975	-0.260466	0.198971	0.240798	-0.114857	0.239676	0.11518	0.126208	-0.163154	0.130736	0.160691	0.0112961	-0.195141	0.0212007	0.194098	-0.100752	-0.230228	-0.0847439	0.234505	-0.209699	-0.272442	-0.19041	0.274823
99311-4week-1-D.tif	0.331086	-0.00907915	-0.251219	-0.213689	-0.24677	0.220628	0.229139	-0.123161	0.230354	0.120852	0.120242	-0.168089	0.122463	0.165902	0.0141225	-0.207115	0.0185987	0.209308	-0.0923927	-0.241384	-0.087338	0.243596	-0.196944	-0.279849	-0.191341	0.28208
99312-4week-1-D.tif	0.322007	0.00540548	-0.249215	-0.215268	-0.231674	0.232652	0.22315	-0.118362	0.224152	0.128639	0.117672	-0.174613	0.119829	0.16942	0.0128752	-0.218212	0.0184955	0.207342	-0.0933388	-0.254129	-0.0824538	0.243943	-0.198802	-0.28976	-0.182697	0.282941
99313-4week-1-D.tif	0.320764	-0.0171244	-0.23016	-0.233014	-0.2431	0.224671	0.226373	-0.136129	0.21917	0.114206	0.120727	-0.178576	0.116281	0.171082	0.0163505	-0.210351	0.0119911	0.213564	-0.0882179	-0.237137	-0.0911859	0.255534	-0.188719	-0.272398	-0.190274	0.305672
99315-4week-1-D.tif	0.378351	-0.0228023	-0.288491	-0.166592	-0.296765	0.209148	0.266784	-0.112027	0.252579	0.0820991	0.149012	-0.155107	0.132979	0.139345	0.0287324	-0.178578	0.0107439	0.176883	-0.0898269	-0.208228	-0.109077	0.216893	-0.207217	-0.240951	-0.227805	0.259917
99317-4week-1-D.tif	0.337343	-0.0114597	-0.262468	-0.172819	-0.252398	0.233202	0.240474	-0.133057	0.228955	0.117941	0.131888	-0.175944	0.119408	0.165626	0.0227192	-0.206688	0.0104949	0.200706	-0.0849549	-0.241096	-0.0970444	0.233521	-0.190985	-0.279146	-0.203432	0.269213
99319-4week-1-D.tif	0.334361	0.00470946	-0.265511	-0.197031	-0.240391	0.218089	0.232703	-0.124156	0.23144	0.130646	0.117413	-0.161924	0.124044	0.170984	0.00807088	-0.201719	0.0188909	0.201864	-0.0972102	-0.248289	-0.0822692	0.235532	-0.19966	-0.300363	-0.181882	0.271658
99320-4week-1-D.tif	0.375157	-0.0123738	-0.293573	-0.161807	-0.292153	0.19207	0.26039	-0.10847	0.254357	0.0952724	0.140922	-0.150959	0.135034	0.143467	0.0214901	-0.179778	0.0157589	0.177814	-0.0951677	-0.215493	-0.0993876	0.218611	-0.209271	-0.259917	-0.213556	0.261562
99323-4week-1-D.tif	0.332942	-0.0243816	-0.250987	-0.17706	-0.242912	0.258906	0.237992	-0.131796	0.223072	0.109086	0.133124	-0.175588	0.112637	0.161575	0.026516	-0.20657	0.00285457	0.200184	-0.0781543	-0.245775	-0.102862	0.241227	-0.182202	-0.284822	-0.21202	0.275012
99327-4week-1-D.tif	0.325115	-0.011637	-0.236847	-0.230048	-0.235335	0.238723	0.225794	-0.1241	0.222525	0.114777	0.117329	-0.166874	0.116893	0.165648	0.0133828	-0.207783	0.012405	0.206919	-0.089281	-0.248163	-0.0890705	0.251298	-0.192695	-0.284288	-0.190215	0.295528
99336-4week-1-D.tif	0.337893	0.00159743	-0.271029	-0.183552	-0.25724	0.200677	0.234138	-0.117187	0.230776	0.116196	0.123005	-0.164537	0.124796	0.164513	0.0149567	-0.206029	0.0198884	0.202331	-0.0915164	-0.247038	-0.0832619	0.239557	-0.197457	-0.287886	-0.184949	0.281357
99339-4week-1-D.tif	0.359846	-0.0163672	-0.282121	-0.166045	-0.268646	0.22691	0.250269	-0.109457	0.245902	0.103971	0.136106	-0.154723	0.131506	0.155933	0.0210618	-0.188904	0.0152166	0.188537	-0.0924229	-0.230131	-0.0988493	0.22024	-0.203873	-0.278335	-0.213996	0.248369
99341-4week-1-D.tif	0.360056	-0.00813241	-0.282314	-0.178244	-0.270303	0.214532	0.250893	-0.113034	0.246534	0.106918	0.134819	-0.15709	0.133412	0.157818	0.0180156	-0.187895	0.0171322	0.187066	-0.0960196	-0.226833	-0.0959629	0.219689	-0.208376	-0.269778	-0.207887	0.254984
99342-4week-1-D.tif	0.360047	-0.00608446	-0.279811	-0.175569	-0.268482	0.219128	0.247773	-0.104753	0.243372	0.102996	0.13196	-0.152195	0.125867	0.143357	0.0180135	-0.191082	0.0131472	0.181906	-0.0933632	-0.233245	-0.0946791	0.226729	-0.201761	-0.28259	-0.202083	0.271402
99343-4week-1-D.tif	0.326402	-0.00378308	-0.246685	-0.216354	-0.237902	0.232898	0.229294	-0.124855	0.221981	0.116748	0.121282	-0.17201	0.118316	0.168036	0.014802	-0.209896	0.0142431	0.20657	-0.090385	-0.247282	-0.0885284	0.244536	-0.194697	-0.284345	-0.188122	0.289737
99344-4week-1-D.tif	0.352602	-0.011725	-0.270534	-0.183153	-0.259579	0.230315	0.245529	-0.117136	0.240207	0.110289	0.13094	-0.157833	0.124119	0.152444	0.0185	-0.193708	0.0116297	0.188838	-0.0918567	-0.233142	-0.0970692	0.227965	-0.199196	-0.280057	-0.205292	0.266903
99347-4week-1-D.tif	0.315219	-0.00821671	-0.239399	-0.212136	-0.228906	0.243677	0.221821	-0.126777	0.21408	0.118916	0.120746	-0.18139	0.114254	0.174766	0.0172589	-0.217831	0.0114913	0.211844	-0.0854565	-0.253956	-0.087907	0.252332	-0.18597	-0.294013	-0.18723	0.292785
99350-4week-1-D.tif	0.326633	0.0016836	-0.243666	-0.233405	-0.231037	0.234916	0.222756	-0.111723	0.225486	0.119117	0.114812	-0.16605	0.120931	0.166058	0.00682997	-0.205207	0.016694	0.202564	-0.0958903	-0.252208	-0.0826276	0.247163	-0.199371	-0.294502	-0.18155	0.291594
99355-4week-1-D.tif	0.365316	-0.0113612	-0.285729	-0.174472	-0.284849	0.194713	0.255928	-0.115855	0.247752	0.0980619	0.139131	-0.157509	0.13227	0.14838	0.0216319	-0.184951	0.017129	0.18763	-0.0936181	-0.218927	-0.0955118	0.22966	-0.207929	-0.256239	-0.211522	0.260867
99356-4week-1-D.tif	0.358932	-0.000311022	-0.283987	-0.181547	-0.266286	0.213344	0.247103	-0.105273	0.246967	0.110121	0.129866	-0.150843	0.133365	0.154192	0.014991	-0.191618	0.0197345	0.185724	-0.0978045	-0.235815	-0.0910375	0.2204	-0.21094	-0.276077	-0.200904	0.257704
99357-4week-1-D.tif	0.364664	-0.00146131	-0.290168	-0.163959	-0.281206	0.191063	0.255115	-0.11617	0.246684	0.103995	0.135455	-0.152809	0.131285	0.148587	0.0192786	-0.188477	0.0172227	0.183514	-0.0945539	-0.227986	-0.0924806	0.226265	-0.207869	-0.267371	-0.203426	0.264808
99359-4week-1-D.tif	0.327873	-0.0111427	-0.252349	-0.194136	-0.246998	0.224502	0.228508	-0.127007	0.224525	0.119698	0.12158	-0.171711	0.116595	0.164946	0.0175508	-0.210878	0.0136776	0.2081	-0.0850985	-0.2496	-0.0889274	0.246522	-0.187123	-0.288125	-0.189813	0.288832
99361-4week-1-D.tif	0.374148	-0.0197836	-0.294299	-0.142774	-0.289914	0.206138	0.259276	-0.104386	0.254336	0.096024	0.14155	-0.148392	0.13461	0.145855	0.0236911	-0.181232	0.0149433	0.180203	-0.0916943	-0.22454	-0.102373	0.213683	-0.20594	-0.271309	-0.218334	0.250514
99365-4week-1-D.tif	0.332873	0.00503529	-0.255565	-0.221188	-0.248317	0.208931	0.232461	-0.119359	0.228408	0.116152	0.122032	-0.169637	0.124767	0.165928	0.0123271	-0.206625	0.0198931	0.203061	-0.0971497	-0.239191	-0.0828996	0.243791	-0.204532	-0.275275	-0.184299	0.288376
99367-4week-1-D.tif	0.385405	0.00429502	-0.311747	-0.148542	-0.288467	0.198495	0.265811	-0.0969827	0.264435	0.103472	0.140677	-0.140562	0.143844	0.145302	0.0161824	-0.174583	0.0218555	0.168716	-0.105018	-0.219909	-0.0956724	0.199982	-0.224276	-0.270884	-0.213031	0.2312
99368-4week-1-D.tif	0.352721	-0.00451401	-0.272335	-0.200694	-0.262722	0.212704	0.242649	-0.110101	0.243808	0.111207	0.127933	-0.157256	0.13149	0.156945	0.013688	-0.192275	0.0190305	0.19086	-0.0982017	-0.230509	-0.0907656	0.227748	-0.208265	-0.272147	-0.199032	0.268032
99370-4week-1-D.tif	0.353785	-0.00850651	-0.276267	-0.187018	-0.271166	0.204148	0.247909	-0.116766	0.238769	0.0997954	0.132882	-0.15782	0.130156	0.159422	0.0198468	-0.194387	0.0171243	0.193553	-0.0934108	-0.227136	-0.0931954	0.230591	-0.204202	-0.266917	-0.202232	0.271041
99372-4week-1-D.tif	0.319973	-0.0018438	-0.239695	-0.22479	-0.241665	0.213904	0.226054	-0.134164	0.220603	0.124936	0.11856	-0.179386	0.117253	0.170411	0.0131996	-0.213437	0.0154898	0.210048	-0.0900675	-0.246632	-0.0838274	0.253874	-0.194399	-0.275131	-0.181479	0.302212
99373-4week-1-D.tif	0.325087	-0.00519458	-0.255092	-0.184055	-0.238148	0.240452	0.231206	-0.128455	0.219226	0.119469	0.126711	-0.179426	0.11477	0.168771	0.0209266	-0.215671	0.0114298	0.20689	-0.0844485	-0.251771	-0.0900869	0.244193	-0.187889	-0.292296	-0.193692	0.277094
99377-4week-1-D.tif	0.327048	0.00425032	-0.251359	-0.22529	-0.245273	0.199446	0.227818	-0.127128	0.229995	0.130699	0.116741	-0.17268	0.126699	0.175301	0.0080767	-0.207713	0.0218753	0.206422	-0.0985516	-0.241921	-0.0793659	0.245602	-0.204605	-0.275904	-0.179098	0.288916
99378-4week-1-D.tif	0.33084	-0.0141758	-0.259042	-0.164514	-0.249095	0.236951	0.234645	-0.129458	0.222981	0.115777	0.130191	-0.179191	0.116913	0.169595	0.0240483	-0.212442	0.00836087	0.202361	-0.0805574	-0.249497	-0.0963292	0.237846	-0.183462	-0.290335	-0.199493	0.277084
99379-4week-1-D.tif	0.332023	-0.0019341	-0.256281	-0.208464	-0.24567	0.22133	0.230712	-0.118467	0.226611	0.11514	0.121771	-0.167941	0.121979	0.166095	0.0136231	-0.2055	0.0162542	0.201997	-0.0919416	-0.246006	-0.0853869	0.244025	-0.196815	-0.286271	-0.186878	0.285995
99380-4week-1-D.tif	0.35559	-0.0020533	-0.268206	-0.220651	-0.273835	0.179334	0.245848	-0.116633	0.244383	0.104517	0.127151	-0.156797	0.132929	0.153919	0.0114052	-0.187705	0.0207089	0.19129	-0.101931	-0.217741	-0.088364	0.235825	-0.211966	-0.254745	-0.193712	0.29144
99381-4week-1-D.tif	0.367948	0.00177726	-0.288836	-0.191831	-0.27613	0.199061	0.252627	-0.0998184	0.251457	0.0992371	0.132929	-0.147148	0.136074	0.144714	0.0140356	-0.183103	0.0227815	0.185772	-0.102678	-0.222041	-0.0907644	0.220764	-0.216811	-0.267553	-0.202632	0.260171
99383-4week-1-D.tif	0.348927	0.00145683	-0.266666	-0.215083	-0.254138	0.21694	0.239548	-0.107882	0.238823	0.109048	0.123435	-0.153567	0.127991	0.154026	0.0106788	-0.193891	0.0195884	0.193898	-0.100532	-0.23365	-0.0872079	0.233172	-0.208299	-0.280416	-0.192149	0.275949
99384-4week-1-D.tif	0.338164	-0.00848437	-0.248848	-0.227541	-0.243898	0.235566	0.234315	-0.115024	0.229632	0.106444	0.123145	-0.160739	0.120982	0.156656	0.014389	-0.2006	0.0146511	0.200857	-0.0950696	-0.235837	-0.0903054	0.244452	-0.200684	-0.279362	-0.196474	0.283612
99385-4week-1-D.tif	0.365592	-0.0262458	-0.271392	-0.183506	-0.278158	0.231715	0.25802	-0.118866	0.243952	0.0893616	0.14249	-0.156191	0.124269	0.140412	0.0270221	-0.184625	0.00607213	0.181711	-0.0868648	-0.216964	-0.108777	0.226091	-0.198963	-0.253218	-0.223262	0.270325
99388-4week-1-D.tif	0.349175	0.00418389	-0.260814	-0.235266	-0.255373	0.209902	0.239965	-0.107494	0.240367	0.106817	0.123425	-0.154937	0.131061	0.154346	0.00784252	-0.190129	0.0219039	0.193902	-0.104845	-0.228076	-0.0852697	0.236656	-0.215491	-0.269146	-0.191946	0.279242
99390-4week-1-D.tif	0.320054	-0.00423637	-0.24815	-0.191818	-0.228749	0.247612	0.227511	-0.131883	0.216929	0.125711	0.122596	-0.17983	0.111456	0.170192	0.0185411	-0.218129	0.00970211	0.208336	-0.0846495	-0.256115	-0.0899898	0.245501	-0.185593	-0.297995	-0.189657	0.282654
99391-4week-1-D.tif	0.357767	-0.00104646	-0.280423	-0.197516	-0.271597	0.196702	0.245604	-0.10448	0.245914	0.103518	0.129852	-0.153786	0.134267	0.152547	0.0148681	-0.191794	0.0234362	0.1939	-0.100053	-0.2261	-0.0883834	0.228199	-0.212543	-0.266981	-0.198709	0.266836
99393-4week-1-D.tif	0.366709	0.00201734	-0.291266	-0.190907	-0.278059	0.190471	0.249224	-0.0966217	0.25619	0.108082	0.131371	-0.149421	0.141431	0.151529	0.0134319	-0.188144	0.0261102	0.18448	-0.104452	-0.22332	-0.0874864	0.220386	-0.221116	-0.261633	-0.202088	0.253081
99396-4week-1-D.tif	0.33902	-0.0042441	-0.260008	-0.211234	-0.256937	0.212328	0.237841	-0.119338	0.230973	0.107192	0.128142	-0.169041	0.127716	0.167523	0.0167804	-0.201888	0.0173374	0.198965	-0.0935877	-0.23438	-0.0893119	0.238519	-0.203435	-0.266693	-0.19453	0.282293
99397-4week-1-D.tif	0.372724	-0.0124659	-0.291547	-0.164437	-0.288889	0.20183	0.259836	-0.107664	0.252316	0.0933817	0.142065	-0.153462	0.135434	0.146822	0.0232388	-0.184004	0.0164369	0.181427	-0.0941081	-0.217982	-0.101073	0.215491	-0.210117	-0.255492	-0.216317	0.256554
99399-4week-1-D.tif	0.352557	-0.00113102	-0.275858	-0.184797	-0.260731	0.225185	0.246595	-0.111627	0.239448	0.108055	0.13365	-0.162871	0.126943	0.1526	0.0188727	-0.196637	0.0157343	0.189059	-0.0943494	-0.233514	-0.0928678	0.228296	-0.206046	-0.273536	-0.203947	0.260918
99402-4week-1-D.tif	0.342252	0.00469998	-0.266524	-0.217064	-0.253339	0.206537	0.234842	-0.110438	0.240012	0.119804	0.12156	-0.160035	0.132285	0.16318	0.00963137	-0.199446	0.0255847	0.201265	-0.101224	-0.238449	-0.0820278	0.234756	-0.213321	-0.273089	-0.189733	0.268278
99403-4week-1-D.tif	0.325912	-0.0128152	-0.257489	-0.171506	-0.251724	0.22011	0.230719	-0.132978	0.220666	0.117978	0.126841	-0.181031	0.117099	0.172834	0.0215436	-0.211945	0.0126059	0.210364	-0.0807824	-0.250789	-0.0903724	0.245566	-0.182746	-0.289535	-0.192273	0.283746
99404-4week-1-D.tif	0.376373	-0.00353276	-0.302875	-0.169828	-0.29773	0.146785	0.256528	-0.103867	0.262406	0.104839	0.135142	-0.148948	0.145011	0.150403	0.0143267	-0.178848	0.0273064	0.18458	-0.10331	-0.21486	-0.088589	0.221788	-0.220827	-0.250852	-0.203762	0.26234
99410-4week-1-D.tif	0.358217	0.00889516	-0.28313	-0.194762	-0.265405	0.206125	0.249251	-0.109084	0.24576	0.110498	0.130346	-0.154302	0.133986	0.154144	0.0132382	-0.191301	0.0217499	0.186393	-0.101538	-0.231308	-0.0883546	0.221753	-0.216674	-0.267657	-0.197447	0.260607
99416-4week-1-D.tif	0.33672	-0.00262238	-0.256148	-0.215234	-0.250453	0.2188	0.236586	-0.121924	0.229571	0.111755	0.12593	-0.169323	0.125746	0.168364	0.0148758	-0.202665	0.0160015	0.199029	-0.0948808	-0.235528	-0.0896283	0.237502	-0.202316	-0.272277	-0.192005	0.284124
99417-4week-1-D.tif	0.363583	0.000288968	-0.28767	-0.191622	-0.275758	0.190991	0.250424	-0.106681	0.25169	0.107506	0.131474	-0.151479	0.13909	0.156809	0.0134074	-0.185889	0.0236866	0.186536	-0.102715	-0.22303	-0.088697	0.22209	-0.217546	-0.263132	-0.200968	0.257611
99418-4week-1-D.tif	0.3306	-0.0015482	-0.258048	-0.205655	-0.252294	0.203843	0.231063	-0.123509	0.225363	0.114538	0.12191	-0.170122	0.122007	0.166691	0.0147245	-0.2073	0.0195053	0.209498	-0.0909936	-0.243964	-0.0831329	0.247835	-0.196334	-0.280497	-0.184369	0.29019
99421-4week-1-D.tif	0.340324	-0.00890046	-0.263128	-0.194783	-0.2489	0.230139	0.239324	-0.12414	0.231905	0.114521	0.126848	-0.16328	0.122559	0.162793	0.0162597	-0.197818	0.0152049	0.201844	-0.0916678	-0.239464	-0.0914734	0.236423	-0.198014	-0.284597	-0.199242	0.267263
99425-4week-1-D.tif	0.348183	-0.0111493	-0.266838	-0.17447	-0.250307	0.251072	0.248789	-0.12449	0.230036	0.104078	0.13613	-0.164398	0.117357	0.153386	0.0241835	-0.198903	0.00634303	0.191364	-0.0862801	-0.238081	-0.102317	0.228271	-0.194506	-0.28177	-0.210774	0.265089
99428-4week-1-D.tif	0.342957	-0.00838112	-0.26197	-0.183953	-0.249546	0.244985	0.246409	-0.128804	0.226834	0.10648	0.134766	-0.16951	0.117517	0.158607	0.0243639	-0.205115	0.00597848	0.191814	-0.0867413	-0.236248	-0.100107	0.232548	-0.194349	-0.275673	-0.206114	0.273248
99430-4week-1-D.tif	0.383448	0.00178951	-0.30527	-0.180141	-0.292669	0.171812	0.260527	-0.0944313	0.265222	0.0990495	0.134497	-0.134679	0.143996	0.136377	0.012503	-0.173588	0.0272288	0.179705	-0.108057	-0.212037	-0.089692	0.215585	-0.225504	-0.260811	-0.20623	0.25137
99431-4week-1-D.tif	0.331399	0.0167094	-0.278413	-0.203993	-0.257258	0.143898	0.221812	-0.104234	0.235417	0.123486	0.113164	-0.165914	0.136621	0.176999	0.00440906	-0.208022	0.0361082	0.216228	-0.102219	-0.249335	-0.0649809	0.250698	-0.210614	-0.286411	-0.165446	0.28989
99432-4week-1-D.tif	0.353812	0.00494488	-0.287242	-0.163406	-0.272044	0.194247	0.245976	-0.108249	0.238954	0.104317	0.13233	-0.161023	0.129825	0.155549	0.0190389	-0.200655	0.0206283	0.193571	-0.0938678	-0.236922	-0.0878998	0.22808	-0.2047	-0.279143	-0.194812	0.268687
99433-4week-1-D.tif	0.332292	-0.0155403	-0.249366	-0.205348	-0.251516	0.227784	0.232476	-0.126581	0.22881	0.115086	0.126975	-0.176152	0.119908	0.163354	0.0193807	-0.206934	0.0132992	0.205654	-0.0872676	-0.237394	-0.0938685	0.24321	-0.191974	-0.272078	-0.199149	0.284941
99434-4week-1-D.tif	0.358891	0.00301638	-0.282314	-0.193943	-0.267829	0.203584	0.249039	-0.110156	0.246575	0.109601	0.131206	-0.155758	0.1337	0.153798	0.0136766	-0.188884	0.0215814	0.189383	-0.101646	-0.225403	-0.0891352	0.224491	-0.214136	-0.26925	-0.19961	0.259522
99438-4week-1-D.tif	0.334894	-0.00233015	-0.260576	-0.206704	-0.256624	0.201225	0.23253	-0.119947	0.230631	0.114885	0.123553	-0.170028	0.125804	0.166125	0.0141096	-0.203843	0.0203295	0.205181	-0.0926228	-0.240823	-0.0842094	0.243908	-0.200249	-0.274009	-0.187572	0.28636
99439-4week-1-D.tif	0.368185	-0.00123376	-0.292741	-0.168242	-0.281571	0.197998	0.253672	-0.100583	0.251205	0.100589	0.136832	-0.153991	0.135273	0.146398	0.0188688	-0.189156	0.0200787	0.182683	-0.0980024	-0.224006	-0.0936352	0.21847	-0.212126	-0.267362	-0.206039	0.258435
99445-4week-1-D.tif	0.366864	-0.00601481	-0.288581	-0.172673	-0.275629	0.210736	0.253633	-0.104819	0.249531	0.101084	0.134896	-0.147615	0.133216	0.147677	0.0182053	-0.185968	0.0174303	0.182068	-0.0966924	-0.227617	-0.0952083	0.219316	-0.21003	-0.272667	-0.207635	0.256493
99447-4week-1-D.tif	0.371418	0.00335222	-0.288626	-0.204001	-0.27943	0.191927	0.252782	-0.0954702	0.256382	0.0991237	0.132049	-0.144795	0.139863	0.142507	0.0112499	-0.178754	0.0246837	0.181615	-0.10589	-0.219113	-0.0895397	0.220389	-0.222419	-0.259288	-0.202523	0.262508
99448-4week-1-D.tif	0.347297	-0.00203211	-0.263139	-0.219268	-0.259183	0.208216	0.239939	-0.11379	0.23929	0.110013	0.12469	-0.157698	0.129728	0.158156	0.0126186	-0.19601	0.0192385	0.193737	-0.0993415	-0.229864	-0.0876347	0.23659	-0.209268	-0.267397	-0.194236	0.279348
99449-4week-1-D.tif	0.351005	0.00219155	-0.27178	-0.209547	-0.256454	0.217293	0.241395	-0.10568	0.241668	0.109663	0.126195	-0.154726	0.131341	0.156056	0.0120815	-0.19403	0.0213238	0.192874	-0.101053	-0.232979	-0.0874945	0.229243	-0.212151	-0.275885	-0.196076	0.265528
99453-4week-1-D.tif	0.335624	0.0185367	-0.256883	-0.244569	-0.236954	0.213162	0.227475	-0.100927	0.234179	0.119342	0.112841	-0.154839	0.130329	0.162474	0.00316905	-0.204304	0.0282384	0.203189	-0.109498	-0.242621	-0.0742394	0.240865	-0.217887	-0.288739	-0.176394	0.278432
99456-4week-1-D.tif	0.344861	-0.00651577	-0.26654	-0.197489	-0.254731	0.227394	0.239585	-0.110035	0.232053	0.101936	0.128515	-0.159363	0.124028	0.156101	0.0183595	-0.200384	0.0162316	0.198093	-0.0923165	-0.237568	-0.0912798	0.235947	-0.20017	-0.28184	-0.198597	0.273725
99458-4week-1-D.tif	0.350915	-0.00166784	-0.277894	-0.181614	-0.261314	0.21654	0.243959	-0.111689	0.240051	0.111174	0.130626	-0.161018	0.130018	0.16029	0.0171023	-0.197889	0.0185929	0.193011	-0.0956758	-0.234529	-0.0911791	0.225124	-0.20566	-0.278676	-0.199541	0.260943
99461-4week-1-D.tif	0.356598	-0.000568201	-0.282078	-0.190128	-0.276788	0.185652	0.248185	-0.111445	0.242664	0.0991892	0.132363	-0.157491	0.133892	0.156396	0.0169051	-0.191156	0.0224542	0.194728	-0.096123	-0.228865	-0.0888332	0.230406	-0.210881	-0.259675	-0.198358	0.272957
99462-4week-1-D.tif	0.338164	-0.0154148	-0.251894	-0.19209	-0.25572	0.23544	0.241529	-0.132847	0.224464	0.105539	0.133131	-0.175478	0.111726	0.150986	0.0245297	-0.204328	0.00544019	0.198297	-0.0815824	-0.236999	-0.0991934	0.244884	-0.186856	-0.269423	-0.20374	0.291434
99463-4week-1-D.tif	0.366276	-0.00662935	-0.289919	-0.162527	-0.272524	0.223246	0.255681	-0.107686	0.250122	0.105247	0.138463	-0.153049	0.134779	0.153904	0.0213236	-0.190683	0.0160249	0.18036	-0.0957163	-0.228246	-0.0985975	0.213028	-0.211369	-0.26926	-0.214545	0.242296
99464-4week-1-D.tif	0.379278	-0.00230785	-0.296468	-0.18581	-0.286085	0.199438	0.260927	-0.0975733	0.25999	0.0956717	0.13818	-0.141493	0.140503	0.140021	0.0162181	-0.175859	0.0212725	0.174802	-0.103376	-0.215576	-0.0950404	0.214782	-0.222486	-0.255172	-0.212914	0.249075
99466-4week-1-D.tif	0.349344	-0.00977097	-0.265832	-0.209246	-0.272929	0.186499	0.240537	-0.11666	0.240137	0.104934	0.126226	-0.158599	0.129821	0.156353	0.0155365	-0.195154	0.0188935	0.195242	-0.0944301	-0.227302	-0.0886162	0.241484	-0.203925	-0.259299	-0.194763	0.291519
99469-4week-1-D.tif	0.362295	0.00288419	-0.285001	-0.196658	-0.277037	0.182435	0.250687	-0.111467	0.250314	0.108518	0.130853	-0.153497	0.136894	0.15276	0.012872	-0.186093	0.0236562	0.188097	-0.102386	-0.222195	-0.0874413	0.227171	-0.217244	-0.258179	-0.198462	0.266224
99471-4week-1-D.tif	0.382663	-0.0135952	-0.299749	-0.154175	-0.290245	0.207701	0.265175	-0.101978	0.257815	0.0905099	0.141475	-0.135061	0.13554	0.137093	0.0212833	-0.173313	0.0151076	0.173051	-0.0963036	-0.220196	-0.101828	0.211016	-0.212575	-0.2699	-0.218358	0.248848
99473-4week-1-D.tif	0.353778	0.00422126	-0.27641	-0.211218	-0.264894	0.194496	0.239997	-0.102886	0.247927	0.114367	0.124182	-0.154102	0.136334	0.155801	0.00878239	-0.191031	0.0261911	0.193205	-0.104061	-0.230578	-0.0830993	0.230322	-0.216492	-0.269988	-0.192236	0.267391
99474-4week-1-D.tif	0.36896	0.000320706	-0.295054	-0.180332	-0.274613	0.192082	0.249017	-0.10099	0.260744	0.121074	0.126167	-0.140234	0.142416	0.154865	0.00838076	-0.181599	0.0256119	0.180614	-0.106005	-0.229311	-0.0872311	0.212555	-0.219706	-0.276843	-0.198689	0.247798
99475-4week-1-D.tif	0.319485	-0.00546895	-0.257744	-0.16158	-0.253322	0.201521	0.225487	-0.137015	0.216433	0.125837	0.122092	-0.183598	0.111618	0.168174	0.0208933	-0.220811	0.0147441	0.216532	-0.0775966	-0.261644	-0.0829476	0.256235	-0.178057	-0.29428	-0.181085	0.296098
99476-4week-1-D.tif	0.36897	-0.0117868	-0.286126	-0.170647	-0.280864	0.211238	0.256668	-0.10941	0.249804	0.0982593	0.13861	-0.151495	0.130984	0.143491	0.021741	-0.186104	0.0141745	0.180782	-0.0941987	-0.220444	-0.0996064	0.220533	-0.207055	-0.264604	-0.213101	0.260187
99478-4week-1-D.tif	0.353971	-0.0187298	-0.269424	-0.171506	-0.263276	0.239031	0.248479	-0.119434	0.239197	0.105195	0.135284	-0.15856	0.120537	0.14677	0.0244806	-0.196995	0.00847467	0.189268	-0.0857346	-0.235255	-0.102821	0.22762	-0.195165	-0.273327	-0.214002	0.265924
99480-4week-1-D.tif	0.317358	0.00261393	-0.239614	-0.246426	-0.235617	0.20154	0.218378	-0.122373	0.224359	0.127367	0.110378	-0.171544	0.128416	0.185373	0.00459126	-0.210786	0.0264043	0.218571	-0.101281	-0.245623	-0.0751242	0.251558	-0.205194	-0.283997	-0.173054	0.293726
99484-4week-1-D.tif	0.376922	0.00484537	-0.29541	-0.193048	-0.283096	0.193719	0.257619	-0.0950021	0.260061	0.100458	0.13579	-0.145406	0.140996	0.139708	0.0125654	-0.176287	0.0234454	0.175014	-0.106644	-0.215776	-0.0912806	0.216003	-0.224345	-0.258115	-0.206624	0.253888
99485-4week-1-D.tif	0.361313	0.00209565	-0.27711	-0.200674	-0.269946	0.208296	0.251187	-0.109752	0.245061	0.102522	0.132963	-0.155798	0.129834	0.144768	0.0148086	-0.186617	0.0166838	0.182409	-0.0994073	-0.223702	-0.0928662	0.226476	-0.211555	-0.263909	-0.200965	0.273886
99487-4week-1-D.tif	0.364626	-0.00627123	-0.277293	-0.196813	-0.268856	0.223535	0.252953	-0.106643	0.246958	0.0986415	0.135748	-0.153887	0.129824	0.143518	0.0169623	-0.183394	0.0150112	0.182863	-0.0983076	-0.220851	-0.0981365	0.221559	-0.210184	-0.266339	-0.209306	0.264082
99491-4week-1-D.tif	0.311711	0.0031339	-0.235705	-0.231545	-0.231104	0.216654	0.222883	-0.137089	0.213858	0.127941	0.116998	-0.184575	0.114137	0.174239	0.0098176	-0.213531	0.0189451	0.221855	-0.0923232	-0.249775	-0.0791498	0.259228	-0.194081	-0.285859	-0.175988	0.299324
99494-4week-1-D.tif	0.344241	0.00119912	-0.260473	-0.219596	-0.250453	0.221247	0.244615	-0.126109	0.235827	0.1153	0.12734	-0.163299	0.128291	0.164874	0.0124678	-0.194948	0.0179449	0.197189	-0.0998987	-0.230241	-0.0914278	0.229117	-0.211421	-0.26523	-0.197052	0.270497
99502-4week-1-D.tif	0.346548	-0.0113899	-0.270101	-0.179524	-0.26258	0.219106	0.243697	-0.122428	0.234898	0.108583	0.131526	-0.163598	0.124886	0.160398	0.0212443	-0.200771	0.014712	0.198061	-0.0893089	-0.234566	-0.094804	0.231918	-0.197639	-0.274636	-0.203078	0.268848
99504-4week-1-D.tif	0.357862	-0.00566689	-0.278877	-0.191471	-0.273158	0.20562	0.249528	-0.111408	0.24487	0.102836	0.13546	-0.161068	0.133531	0.155686	0.0195201	-0.193527	0.0195584	0.191123	-0.0970709	-0.221735	-0.0935397	0.226238	-0.210997	-0.257998	-0.206686	0.261369
99511-4week-1-D.tif	0.328707	0.00718678	-0.251	-0.2365	-0.24546	0.194215	0.225395	-0.116477	0.228851	0.120472	0.11356	-0.16452	0.12554	0.165348	0.00611417	-0.20571	0.0258891	0.21244	-0.101087	-0.241843	-0.0748957	0.253322	-0.206226	-0.282042	-0.175387	0.294107
99512-4week-1-D.tif	0.358367	-0.0102179	-0.27695	-0.191705	-0.272866	0.208709	0.249194	-0.11115	0.24367	0.0991978	0.134275	-0.156662	0.131813	0.154156	0.0191044	-0.190009	0.0172053	0.189596	-0.0953503	-0.223125	-0.0947467	0.228162	-0.207227	-0.26361	-0.206491	0.266657
99514-4week-1-D.tif	0.335267	0.00563252	-0.261534	-0.204487	-0.237204	0.235413	0.232711	-0.113641	0.22884	0.119502	0.121417	-0.164041	0.121161	0.161619	0.0109044	-0.202779	0.0166389	0.198613	-0.0948366	-0.251131	-0.0852807	0.236819	-0.200813	-0.295797	-0.187271	0.274276
99516-4week-1-D.tif	0.373668	-0.00817649	-0.293831	-0.169259	-0.282963	0.208055	0.261484	-0.109749	0.253126	0.0961742	0.140374	-0.147003	0.136989	0.149506	0.0204957	-0.180115	0.0179253	0.181218	-0.0973799	-0.219983	-0.0994644	0.212316	-0.214752	-0.259738	-0.215672	0.246754
99522-4week-1-D.tif	0.350457	0.00194285	-0.277243	-0.196936	-0.267544	0.190286	0.240655	-0.109948	0.243341	0.113431	0.126931	-0.16136	0.134169	0.16119	0.0128783	-0.196421	0.0243482	0.197079	-0.0996691	-0.230991	-0.0855944	0.228984	-0.210557	-0.26914	-0.192171	0.271883
99523-4week-1-D.tif	0.32242	0.00508427	-0.253578	-0.206346	-0.230648	0.23517	0.227728	-0.121748	0.216461	0.117908	0.119516	-0.170197	0.117967	0.173894	0.0153389	-0.217087	0.0154284	0.207255	-0.090815	-0.255455	-0.0838102	0.244062	-0.194605	-0.297571	-0.181403	0.285031
99525-4week-1-D.tif	0.340781	0.00670657	-0.26796	-0.214079	-0.248856	0.209715	0.235504	-0.113037	0.237488	0.120664	0.121679	-0.161704	0.132391	0.169664	0.0076595	-0.196518	0.0245945	0.200888	-0.102343	-0.239102	-0.0820495	0.231696	-0.211826	-0.281499	-0.187064	0.266605
99526-4week-1-D.tif	0.351883	-0.00532672	-0.275946	-0.18585	-0.265318	0.213583	0.242808	-0.107353	0.240125	0.105253	0.130449	-0.158812	0.12842	0.152905	0.0173512	-0.195042	0.0189116	0.194504	-0.0935562	-0.235755	-0.0907386	0.230918	-0.204032	-0.276346	-0.200357	0.267321
99527-4week-1-D.tif	0.327094	0.000999797	-0.254804	-0.206152	-0.239521	0.224191	0.229541	-0.124013	0.222358	0.119949	0.119783	-0.168686	0.118047	0.166683	0.0144912	-0.21172	0.0167718	0.20795	-0.0914097	-0.249202	-0.0832671	0.247357	-0.194924	-0.291592	-0.184162	0.284235
99528-4week-1-D.tif	0.341262	-0.00850011	-0.253311	-0.21879	-0.252972	0.221901	0.236824	-0.119663	0.232579	0.109054	0.123958	-0.161991	0.12186	0.155455	0.0142581	-0.198366	0.0151745	0.20023	-0.0937947	-0.234141	-0.0916369	0.240259	-0.199465	-0.273846	-0.194737	0.288398
99531-4week-1-D.tif	0.336185	-0.00486522	-0.250473	-0.225468	-0.247554	0.223456	0.233813	-0.119225	0.230968	0.112608	0.124044	-0.16867	0.124083	0.162605	0.0118498	-0.198214	0.017037	0.202171	-0.0956463	-0.236344	-0.0889868	0.241316	-0.202436	-0.274211	-0.192883	0.284841
99532-4week-1-D.tif	0.338147	-0.00670208	-0.265375	-0.188973	-0.246285	0.227451	0.237283	-0.125479	0.231331	0.11917	0.124064	-0.162147	0.123461	0.167747	0.0139875	-0.197821	0.0177046	0.206314	-0.0919504	-0.24508	-0.0903017	0.232098	-0.197286	-0.292159	-0.194779	0.265581
99535-4week-1-D.tif	0.361447	-0.00190919	-0.283569	-0.18163	-0.274472	0.20264	0.252351	-0.114263	0.246024	0.105208	0.133596	-0.153625	0.131898	0.151189	0.0173025	-0.188024	0.0175089	0.184257	-0.0956106	-0.22982	-0.0929532	0.224632	-0.21005	-0.263679	-0.203473	0.265025
99536-4week-1-D.tif	0.361703	-0.0119982	-0.278131	-0.182023	-0.270543	0.221369	0.252484	-0.114216	0.245534	0.102513	0.135856	-0.155514	0.129812	0.151215	0.019788	-0.187631	0.0138973	0.185937	-0.0943294	-0.223657	-0.100065	0.219902	-0.205389	-0.267793	-0.210617	0.261896
99537-4week-1-D.tif	0.339541	-0.00241714	-0.263171	-0.206918	-0.25531	0.210638	0.23589	-0.116666	0.232844	0.112257	0.125175	-0.165422	0.12583	0.161573	0.0146869	-0.201365	0.019515	0.201902	-0.0947644	-0.236947	-0.0856133	0.241795	-0.202604	-0.276219	-0.192019	0.277792
99541-4week-1-D.tif	0.361713	0.00513452	-0.279608	-0.20818	-0.259496	0.223027	0.245237	-0.0925254	0.248956	0.104601	0.127577	-0.146068	0.1349	0.148032	0.0106301	-0.188247	0.0217855	0.183557	-0.105091	-0.229977	-0.0899841	0.218565	-0.217594	-0.277963	-0.199026	0.260043
99542-4week-1-D.tif	0.37464	-0.00385441	-0.291326	-0.183564	-0.280533	0.207001	0.255546	-0.092651	0.254184	0.0928409	0.134876	-0.14022	0.135831	0.13981	0.0160512	-0.179668	0.01594	0.168613	-0.100294	-0.222108	-0.0944914	0.220161	-0.213817	-0.271227	-0.206608	0.264866
99543-4week-1-D.tif	0.334032	-0.00304708	-0.254345	-0.207104	-0.244791	0.235016	0.233802	-0.118338	0.227697	0.113959	0.126853	-0.172796	0.120389	0.16111	0.0172734	-0.207134	0.0129792	0.197484	-0.0902808	-0.243974	-0.0904143	0.24094	-0.198073	-0.277677	-0.195121	0.281562
99545-4week-1-D.tif	0.359247	-0.00204934	-0.278951	-0.202805	-0.270401	0.199861	0.24625	-0.103314	0.245069	0.0988058	0.128057	-0.147052	0.133822	0.151716	0.0131278	-0.186845	0.0213911	0.189305	-0.0996363	-0.228759	-0.0887682	0.22906	-0.211788	-0.270483	-0.197419	0.272559
99546-4week-1-D.tif	0.342581	-0.00119569	-0.267933	-0.211682	-0.262705	0.186071	0.233225	-0.109801	0.237591	0.110495	0.120678	-0.158592	0.132253	0.165183	0.010408	-0.19788	0.0248814	0.20295	-0.0981302	-0.236562	-0.0814262	0.240378	-0.206301	-0.275118	-0.185122	0.285754
99550-4week-1-D.tif	0.325813	0.00713954	-0.258262	-0.209303	-0.237883	0.219398	0.224813	-0.114599	0.225735	0.124709	0.118882	-0.173442	0.123524	0.171433	0.00953551	-0.208686	0.0215821	0.207807	-0.0953331	-0.25218	-0.0790618	0.243676	-0.199677	-0.295481	-0.179668	0.27953
99551-4week-1-D.tif	0.343759	6.53843e-05	-0.264526	-0.208475	-0.253495	0.221018	0.237278	-0.10914	0.234855	0.108703	0.126812	-0.164152	0.125965	0.155979	0.0134114	-0.197058	0.0189786	0.197798	-0.095987	-0.237799	-0.0883573	0.235032	-0.204698	-0.278306	-0.193995	0.276335
99552-4week-1-D.tif	0.357347	-0.00747339	-0.275122	-0.182573	-0.26745	0.22345	0.249818	-0.113648	0.241925	0.104429	0.135328	-0.160045	0.126335	0.148419	0.0217174	-0.197344	0.013302	0.18687	-0.0931636	-0.226206	-0.0981667	0.224713	-0.203844	-0.267053	-0.208027	0.26646
99554-4week-1-D.tif	0.362284	-0.0123532	-0.277913	-0.182676	-0.274616	0.217715	0.251988	-0.110344	0.245628	0.0989548	0.137046	-0.157516	0.129325	0.146943	0.0207751	-0.187731	0.0136241	0.184168	-0.0928469	-0.224087	-0.0993701	0.223855	-0.204885	-0.263467	-0.211039	0.266538
99557-4week-1-D.tif	0.352747	-0.00643446	-0.268666	-0.214641	-0.27031	0.197025	0.241272	-0.105904	0.24229	0.0995852	0.127943	-0.156289	0.132969	0.1552	0.0148197	-0.193058	0.0209771	0.193562	-0.0982477	-0.225294	-0.0889395	0.235735	-0.209503	-0.261418	-0.197352	0.281931
99558-4week-1-D.tif	0.377711	0.000104295	-0.29266	-0.191383	-0.282515	0.209338	0.259466	-0.0927096	0.257707	0.0924083	0.139461	-0.146395	0.139775	0.140379	0.0170638	-0.179441	0.0192909	0.171261	-0.10337	-0.21537	-0.0972447	0.211404	-0.222029	-0.254316	-0.212655	0.254721
99560-4week-1-D.tif	0.334194	0.00579113	-0.258704	-0.212165	-0.242228	0.226895	0.234966	-0.120096	0.23058	0.122395	0.12456	-0.170749	0.124599	0.166449	0.0134874	-0.206757	0.0168792	0.196482	-0.0965793	-0.242377	-0.0851589	0.238944	-0.206011	-0.277767	-0.190585	0.272955
99563-4week-1-D.tif	0.346746	-0.0195626	-0.26227	-0.186977	-0.26606	0.226561	0.244855	-0.121607	0.23063	0.0956806	0.135856	-0.168242	0.120596	0.153985	0.0252872	-0.198931	0.00933644	0.196058	-0.0846233	-0.229419	-0.10026	0.237442	-0.191852	-0.267327	-0.208241	0.282339
99564-4week-1-D.tif	0.350653	-0.0155386	-0.273598	-0.144127	-0.271532	0.225091	0.249877	-0.125109	0.231204	0.100404	0.140139	-0.170822	0.117427	0.149991	0.0299612	-0.205004	0.00763189	0.193961	-0.080592	-0.235394	-0.101224	0.233558	-0.188413	-0.276752	-0.211534	0.269742
99565-4week-1-D.tif	0.367421	0.00626402	-0.281099	-0.21357	-0.27003	0.207869	0.251634	-0.097048	0.251059	0.0982704	0.131076	-0.146018	0.135633	0.141974	0.0108355	-0.181116	0.0211197	0.179223	-0.105926	-0.221211	-0.0902359	0.222666	-0.220639	-0.264303	-0.20085	0.266999
99566-4week-1-D.tif	0.353313	-0.00788832	-0.269604	-0.194189	-0.257021	0.234037	0.244987	-0.109918	0.238955	0.103789	0.130316	-0.155042	0.125186	0.150705	0.0168698	-0.191919	0.0132671	0.188789	-0.093379	-0.235604	-0.0967192	0.226078	-0.20257	-0.278977	-0.2036	0.270139
99567-4week-1-D.tif	0.342331	-0.0050058	-0.262611	-0.202606	-0.254623	0.219003	0.237857	-0.118249	0.234793	0.113846	0.126713	-0.166878	0.125271	0.160974	0.0147618	-0.199072	0.0169047	0.199126	-0.0945852	-0.234569	-0.0912728	0.232945	-0.200641	-0.27732	-0.194898	0.277806
99569-4week-1-D.tif	0.357999	-0.0176723	-0.277095	-0.156918	-0.274622	0.225398	0.252917	-0.119252	0.239679	0.0994045	0.140876	-0.165493	0.12358	0.14846	0.0265358	-0.192234	0.00925879	0.187674	-0.0848724	-0.23067	-0.102636	0.227128	-0.195774	-0.269	-0.215846	0.263175
99575-4week-1-D.tif	0.322281	0.00295763	-0.241696	-0.239291	-0.238374	0.20877	0.22494	-0.126376	0.226265	0.127714	0.117039	-0.177039	0.125197	0.176535	0.00786658	-0.20975	0.0235237	0.215823	-0.101361	-0.237855	-0.080718	0.246362	-0.205058	-0.277391	-0.179905	0.28954
99576-4week-1-D.tif	0.32883	-0.00704021	-0.249897	-0.202956	-0.238387	0.244954	0.234173	-0.126656	0.220025	0.111965	0.127324	-0.173701	0.113485	0.160745	0.0205745	-0.210451	0.00959151	0.202974	-0.0857828	-0.247044	-0.0909112	0.248961	-0.191654	-0.283476	-0.197371	0.281725
99577-4week-1-D.tif	0.332727	-0.00659018	-0.249905	-0.220043	-0.250447	0.213011	0.232253	-0.126082	0.229205	0.116855	0.121714	-0.169213	0.122649	0.165259	0.0145203	-0.206635	0.0181671	0.20837	-0.0939622	-0.235644	-0.0881675	0.24323	-0.198942	-0.272244	-0.189812	0.289725
99578-4week-1-D.tif	0.332537	-0.00179361	-0.261911	-0.178113	-0.245684	0.22973	0.239559	-0.137638	0.223369	0.121475	0.128269	-0.174091	0.117596	0.169973	0.0213274	-0.213392	0.0108593	0.201597	-0.0870142	-0.244724	-0.0923933	0.236113	-0.192258	-0.28351	-0.194257	0.274375
99579-4week-1-D.tif	0.350379	-0.0111765	-0.262745	-0.203424	-0.259531	0.229149	0.244497	-0.116668	0.23721	0.103549	0.13072	-0.159524	0.123925	0.151427	0.0182254	-0.193801	0.0119557	0.190398	-0.0919435	-0.231374	-0.0970871	0.232342	-0.201192	-0.268662	-0.204414	0.277764
99580-4week-1-D.tif	0.335799	0.00819675	-0.268849	-0.213524	-0.263157	0.156381	0.230082	-0.115037	0.234302	0.115477	0.118917	-0.16685	0.132277	0.168851	0.00940168	-0.204694	0.0291245	0.210594	-0.0995629	-0.237231	-0.0739003	0.251102	-0.20851	-0.269765	-0.175922	0.2965
99581-4week-1-D.tif	0.345775	-0.00693068	-0.261175	-0.204733	-0.257487	0.226097	0.245634	-0.124707	0.23274	0.105295	0.132962	-0.168132	0.123556	0.157714	0.0187933	-0.195521	0.0124602	0.194246	-0.0920455	-0.230033	-0.0960574	0.233899	-0.202108	-0.264294	-0.203046	0.277099
99582-4week-1-D.tif	0.316337	-0.00984678	-0.248152	-0.17749	-0.235224	0.242571	0.226734	-0.135211	0.210375	0.11871	0.125528	-0.185008	0.108655	0.172105	0.0236418	-0.221809	0.00754424	0.211493	-0.0777741	-0.258441	-0.0896586	0.253599	-0.177527	-0.298951	-0.190478	0.288279
99585-4week-1-D.tif	0.349567	0.0104381	-0.281111	-0.18093	-0.26668	0.202483	0.244272	-0.109394	0.237911	0.108242	0.131949	-0.165499	0.12961	0.154599	0.0181546	-0.20269	0.0215129	0.19313	-0.093366	-0.243037	-0.0873158	0.228016	-0.209725	-0.265546	-0.19478	0.270188
99587-4week-1-D.tif	0.319719	-0.00494599	-0.246294	-0.213732	-0.233573	0.233403	0.225595	-0.126778	0.218734	0.120089	0.121139	-0.176834	0.117837	0.17308	0.0155765	-0.21311	0.0176797	0.216131	-0.0897276	-0.249268	-0.0846581	0.250551	-0.19334	-0.289511	-0.188688	0.280926
99588-4week-1-D.tif	0.345212	-0.00457195	-0.266717	-0.19704	-0.259024	0.214334	0.242398	-0.123532	0.236561	0.11453	0.12903	-0.166238	0.126379	0.160852	0.0163106	-0.19787	0.0175862	0.199318	-0.0942636	-0.232425	-0.0921313	0.230794	-0.203153	-0.270061	-0.198187	0.27191
99591-4week-1-D.tif	0.319	-0.0037103	-0.240996	-0.219272	-0.23679	0.227474	0.223182	-0.127056	0.220399	0.123512	0.120613	-0.18299	0.117702	0.171759	0.0144638	-0.215334	0.0168214	0.214155	-0.0902295	-0.247095	-0.0867342	0.247607	-0.19253	-0.282915	-0.184902	0.293866
99592-4week-1-D.tif	0.313704	-0.013155	-0.233598	-0.208677	-0.224607	0.257716	0.224167	-0.13495	0.212785	0.120786	0.122993	-0.184	0.11007	0.173051	0.0215768	-0.222087	0.00526747	0.208696	-0.0810403	-0.25511	-0.0935562	0.252952	-0.182871	-0.287857	-0.194889	0.292635
99597-4week-1-D.tif	0.356598	-0.000201744	-0.278641	-0.19297	-0.268052	0.20601	0.249387	-0.114143	0.241974	0.104529	0.132335	-0.157225	0.130145	0.152811	0.0158334	-0.189034	0.0185131	0.189929	-0.0976054	-0.227246	-0.0905246	0.22984	-0.20951	-0.268672	-0.200452	0.266371
99599-4week-1-D.tif	0.350762	-0.00382476	-0.272285	-0.197903	-0.265283	0.207496	0.243217	-0.112067	0.239398	0.105362	0.129479	-0.159756	0.130445	0.159062	0.0157461	-0.194047	0.0179552	0.191263	-0.095473	-0.231988	-0.0904869	0.231123	-0.206035	-0.269726	-0.19744	0.275004
99600-4week-1-D.tif	0.338861	-0.000661015	-0.262251	-0.205563	-0.251181	0.214443	0.234682	-0.11874	0.23454	0.12052	0.122957	-0.166233	0.125862	0.164033	0.0121083	-0.201223	0.0183017	0.19878	-0.0959379	-0.239304	-0.0864152	0.23664	-0.202001	-0.280767	-0.189525	0.278076
99601-4week-1-D.tif	0.330194	0.00347562	-0.245923	-0.24019	-0.235842	0.220179	0.225147	-0.11505	0.231879	0.125266	0.112647	-0.162307	0.126005	0.168139	0.00421201	-0.203387	0.0224042	0.206722	-0.10239	-0.24366	-0.08095	0.242471	-0.206575	-0.287267	-0.180809	0.285609
99602-4week-1-D.tif	0.327534	-0.00904341	-0.248976	-0.208592	-0.239846	0.237732	0.231947	-0.127138	0.223061	0.115557	0.125998	-0.175581	0.11904	0.168945	0.0188912	-0.210677	0.0140554	0.208554	-0.0893198	-0.241577	-0.0913832	0.243628	-0.19427	-0.280471	-0.196732	0.278664
99603-4week-1-D.tif	0.330426	-0.0143735	-0.238553	-0.230932	-0.243454	0.235479	0.233232	-0.128981	0.225257	0.109752	0.123804	-0.169268	0.119147	0.163539	0.016588	-0.203823	0.0131856	0.207417	-0.0898221	-0.238042	-0.0937826	0.24683	-0.197236	-0.267858	-0.198791	0.290261
99606-4week-1-D.tif	0.375437	-0.00224716	-0.301994	-0.15613	-0.279938	0.205411	0.254512	-0.0909859	0.261381	0.110214	0.134044	-0.14113	0.140461	0.145451	0.0148977	-0.183234	0.0223702	0.175652	-0.102561	-0.228649	-0.0925041	0.208671	-0.217825	-0.281091	-0.208281	0.238067
99607-4week-1-D.tif	0.321457	0.00263975	-0.251687	-0.201658	-0.229548	0.24029	0.227177	-0.124515	0.218209	0.123527	0.122358	-0.179212	0.116515	0.172917	0.0150152	-0.214492	0.0135119	0.206546	-0.0898133	-0.253911	-0.0858392	0.243986	-0.19221	-0.297525	-0.185146	0.281407
99612-4week-1-D.tif	0.369334	-0.0130218	-0.291461	-0.148459	-0.275108	0.225968	0.258143	-0.10679	0.248006	0.0971921	0.140303	-0.148406	0.13132	0.149248	0.0231736	-0.185919	0.0134407	0.181769	-0.0931113	-0.22697	-0.101722	0.213219	-0.2058	-0.282362	-0.216518	0.244533
99615-4week-1-D.tif	0.309032	-0.00834746	-0.244306	-0.181285	-0.219983	0.254919	0.221159	-0.135983	0.209608	0.129403	0.121134	-0.185835	0.109588	0.18115	0.0210529	-0.226556	0.00815268	0.214455	-0.079811	-0.264724	-0.0882139	0.251913	-0.178123	-0.30935	-0.189291	0.280242
99616-4week-1-D.tif	0.363798	0.00387383	-0.282287	-0.217001	-0.268506	0.202355	0.243318	-0.0890247	0.257531	0.109666	0.12759	-0.149491	0.144806	0.156096	0.00774572	-0.184845	0.0283712	0.184619	-0.109896	-0.223161	-0.0866224	0.216416	-0.226229	-0.263487	-0.19962	0.253985
99617-4week-1-D.tif	0.372602	-0.0189936	-0.286912	-0.162576	-0.278537	0.226525	0.261083	-0.117078	0.254972	0.105059	0.140838	-0.147833	0.131395	0.144026	0.0230272	-0.181098	0.0115385	0.178052	-0.093185	-0.220464	-0.104966	0.214055	-0.208133	-0.262818	-0.223722	0.243144
99618-4week-1-D.tif	0.336636	-0.00247027	-0.258689	-0.2144	-0.251189	0.215982	0.232484	-0.11468	0.233234	0.114828	0.123594	-0.167463	0.127892	0.16615	0.0128983	-0.202095	0.0209572	0.203777	-0.095238	-0.240493	-0.08678	0.236941	-0.204335	-0.274545	-0.191465	0.278467
99620-4week-1-D.tif	0.34691	-0.0135325	-0.263694	-0.199344	-0.264316	0.213966	0.242096	-0.120591	0.236117	0.105492	0.130211	-0.164277	0.125601	0.157946	0.0182522	-0.194872	0.0147987	0.197216	-0.0913814	-0.229102	-0.0944201	0.235883	-0.19882	-0.268442	-0.201354	0.279657
99621-4week-1-D.tif	0.316067	0.00113008	-0.237088	-0.24147	-0.229719	0.217443	0.215808	-0.123093	0.229054	0.140269	0.110384	-0.176113	0.126579	0.181321	0.00500688	-0.214396	0.025117	0.216915	-0.100765	-0.247952	-0.0776064	0.248039	-0.204396	-0.285436	-0.178441	0.283344
99622-4week-1-D.tif	0.322139	-0.00191016	-0.241772	-0.230176	-0.239883	0.217675	0.224275	-0.125568	0.225229	0.125027	0.117898	-0.175837	0.121964	0.171399	0.0118589	-0.212388	0.0200684	0.212569	-0.0943381	-0.24448	-0.0829306	0.249556	-0.200107	-0.276402	-0.184402	0.290537
99624-4week-1-D.tif	0.353327	-0.00802281	-0.272812	-0.193217	-0.262325	0.223231	0.244726	-0.108721	0.240423	0.103276	0.130979	-0.155878	0.128568	0.153649	0.0182862	-0.195348	0.0170099	0.19256	-0.0947309	-0.231242	-0.094243	0.227574	-0.205146	-0.273669	-0.204062	0.265807
99627-4week-1-D.tif	0.33407	0.00610913	-0.260713	-0.215406	-0.247907	0.207911	0.231867	-0.116364	0.230121	0.118086	0.120525	-0.165828	0.126203	0.166733	0.0112955	-0.205993	0.0215061	0.202989	-0.0978293	-0.241871	-0.080882	0.242639	-0.20504	-0.281274	-0.183216	0.28227
99628-4week-1-D.tif	0.330664	-0.000320858	-0.258035	-0.188877	-0.238361	0.240371	0.235155	-0.126716	0.221338	0.117283	0.126656	-0.174228	0.114896	0.163543	0.0179189	-0.208682	0.011809	0.203664	-0.087373	-0.250727	-0.0909379	0.238969	-0.191751	-0.292482	-0.191978	0.278204
99630-4week-1-D.tif	0.345572	-0.00210366	-0.275021	-0.191981	-0.269853	0.184083	0.237801	-0.111246	0.238355	0.10881	0.127407	-0.16524	0.132035	0.163672	0.0159195	-0.200927	0.02331	0.200688	-0.0950187	-0.23383	-0.0842145	0.238479	-0.205083	-0.269076	-0.191209	0.278674
99631-4week-1-D.tif	0.376989	-0.00395078	-0.301672	-0.16099	-0.288379	0.193001	0.259496	-0.0978181	0.257471	0.0964058	0.138537	-0.143336	0.139345	0.143405	0.0180956	-0.178864	0.0220341	0.180235	-0.0997787	-0.222614	-0.0938154	0.215643	-0.217203	-0.267047	-0.211119	0.245931
99634-4week-1-D.tif	0.343044	0.00167671	-0.265956	-0.204839	-0.258374	0.213124	0.235787	-0.10763	0.237379	0.112761	0.1277	-0.1689	0.128918	0.158596	0.015939	-0.205114	0.0202141	0.195673	-0.0957647	-0.236919	-0.0881128	0.232604	-0.206802	-0.2685	-0.193972	0.277467
99635-4week-1-D.tif	0.34395	0.00105734	-0.262972	-0.208935	-0.246847	0.235414	0.242636	-0.116893	0.233189	0.11039	0.13041	-0.16673	0.12562	0.161059	0.0156459	-0.198532	0.0150901	0.193837	-0.097288	-0.233444	-0.0929523	0.229397	-0.206998	-0.274775	-0.199484	0.268155
99636-4week-1-D.tif	0.369503	-0.0153414	-0.290304	-0.149896	-0.280184	0.218803	0.2582	-0.108495	0.248642	0.096402	0.140746	-0.149768	0.131568	0.148668	0.0243073	-0.187381	0.0130126	0.18112	-0.0918233	-0.22488	-0.102033	0.215609	-0.204806	-0.274848	-0.216828	0.250007
99638-4week-1-D.tif	0.374361	0.00148962	-0.297433	-0.181354	-0.282687	0.193658	0.257942	-0.100183	0.257207	0.100344	0.135976	-0.144525	0.141529	0.149571	0.0154096	-0.181461	0.023127	0.178769	-0.104285	-0.218102	-0.0921249	0.213857	-0.221762	-0.260976	-0.207259	0.248911
99641-4week-1-D.tif	0.325458	-0.00078241	-0.24542	-0.223416	-0.232682	0.237015	0.225392	-0.117813	0.223871	0.120082	0.117656	-0.168179	0.118704	0.165645	0.0127193	-0.212032	0.0155872	0.204788	-0.0928292	-0.250767	-0.0844461	0.24804	-0.197653	-0.289222	-0.186358	0.28664
99642-4week-1-D.tif	0.347364	-0.00254194	-0.275524	-0.187516	-0.26717	0.199397	0.241161	-0.112779	0.238224	0.108496	0.130089	-0.165182	0.131331	0.163634	0.0180558	-0.201708	0.0209898	0.197878	-0.0945387	-0.233014	-0.0883589	0.231786	-0.205353	-0.26917	-0.19627	0.27072
99643-4week-1-D.tif	0.342344	-0.00223688	-0.27026	-0.189179	-0.259357	0.205315	0.241295	-0.127347	0.235614	0.120012	0.128217	-0.168762	0.127412	0.166984	0.01635	-0.2012	0.0188925	0.200931	-0.0945942	-0.233348	-0.088101	0.234343	-0.202797	-0.273242	-0.195016	0.267728
99645-4week-1-D.tif	0.341528	-0.00926895	-0.259686	-0.203052	-0.255809	0.224492	0.236755	-0.116193	0.234821	0.111457	0.127898	-0.167693	0.124282	0.157893	0.017687	-0.202181	0.0159285	0.198982	-0.0914864	-0.236322	-0.0928347	0.235773	-0.199581	-0.271664	-0.199501	0.277777
99646-4week-1-D.tif	0.331193	0.00458651	-0.25914	-0.213657	-0.246891	0.209707	0.231035	-0.11772	0.226034	0.114494	0.121737	-0.16897	0.123616	0.166333	0.012493	-0.206234	0.0215302	0.208534	-0.0955629	-0.243049	-0.0809389	0.246117	-0.201756	-0.28382	-0.183348	0.283679
99647-4week-1-D.tif	0.3368	-0.0127361	-0.262214	-0.171663	-0.244091	0.245751	0.237415	-0.122843	0.226723	0.114089	0.130246	-0.171956	0.11724	0.163897	0.021483	-0.20573	0.00781954	0.197528	-0.0859891	-0.24306	-0.0957519	0.236562	-0.187861	-0.298513	-0.201818	0.268673
99649-4week-1-D.tif	0.342589	-0.0252111	-0.257804	-0.189161	-0.253173	0.245602	0.239213	-0.1213	0.236658	0.110346	0.130274	-0.162628	0.122706	0.15869	0.0222372	-0.199627	0.0106632	0.197857	-0.0848341	-0.24033	-0.101263	0.232835	-0.193472	-0.273476	-0.213794	0.266405
99652-4week-1-D.tif	0.359815	-0.00170039	-0.284222	-0.185217	-0.272344	0.204755	0.248437	-0.104462	0.24671	0.104	0.133238	-0.155566	0.134062	0.152215	0.0172506	-0.191839	0.0211713	0.189048	-0.0980461	-0.227889	-0.0905651	0.225474	-0.212037	-0.267312	-0.20347	0.258493
99653-4week-1-D.tif	0.380241	0.00185107	-0.303257	-0.171813	-0.284305	0.200653	0.261508	-0.095355	0.260034	0.0970853	0.136792	-0.135293	0.141447	0.142165	0.0157934	-0.177642	0.0230616	0.175782	-0.103616	-0.223122	-0.093777	0.208853	-0.223334	-0.265081	-0.210588	0.241917
99654-4week-1-D.tif	0.357836	0.00787676	-0.272802	-0.228446	-0.271371	0.183066	0.246973	-0.104635	0.244683	0.0965869	0.127664	-0.150354	0.134339	0.146074	0.010932	-0.18726	0.0237234	0.187957	-0.105436	-0.220134	-0.0826112	0.243699	-0.220304	-0.256308	-0.193626	0.281878
99655-4week-1-D.tif	0.383944	-0.0063214	-0.298653	-0.186595	-0.286375	0.207583	0.26299	-0.0914681	0.262556	0.090007	0.139534	-0.136422	0.142682	0.139812	0.0161912	-0.171139	0.0210205	0.172802	-0.104958	-0.211794	-0.098148	0.208314	-0.223871	-0.258475	-0.216912	0.243698
99658-4week-1-D.tif	0.362431	-0.0105552	-0.280207	-0.186163	-0.278871	0.199303	0.251885	-0.115981	0.249315	0.106454	0.134868	-0.157488	0.133825	0.153585	0.0183011	-0.187252	0.0171053	0.185435	-0.0961018	-0.220234	-0.0959379	0.223837	-0.208963	-0.256638	-0.20765	0.265698
99660-4week-1-D.tif	0.35742	-0.00915198	-0.276976	-0.1825	-0.263236	0.228594	0.248836	-0.110121	0.241908	0.102829	0.133588	-0.154337	0.127402	0.150326	0.0191311	-0.190966	0.0149692	0.189449	-0.0939043	-0.230814	-0.0966884	0.224505	-0.204426	-0.277251	-0.208025	0.259437
99661-4week-1-D.tif	0.329719	0.0166777	-0.257432	-0.240182	-0.247543	0.175405	0.223192	-0.111241	0.237401	0.133914	0.114242	-0.172028	0.135371	0.174189	0.00120995	-0.205459	0.0328691	0.209834	-0.109553	-0.237863	-0.0698386	0.245502	-0.218311	-0.274233	-0.171327	0.285485
99663-4week-1-D.tif	0.350928	0.00319323	-0.274053	-0.200045	-0.26322	0.20812	0.247028	-0.116919	0.238681	0.107695	0.131181	-0.160951	0.129506	0.156751	0.0163973	-0.195717	0.0191936	0.192601	-0.0974843	-0.230173	-0.0888582	0.232184	-0.210927	-0.264487	-0.198372	0.267748
99664-4week-1-D.tif	0.357616	-0.00125744	-0.271349	-0.218007	-0.262837	0.215427	0.244318	-0.102709	0.248579	0.107376	0.128246	-0.152994	0.135308	0.152302	0.0108097	-0.186418	0.0219496	0.188533	-0.102906	-0.227131	-0.0906908	0.224474	-0.217271	-0.263769	-0.201772	0.264174
99665-4week-1-D.tif	0.33365	-0.0025849	-0.2515	-0.225873	-0.251754	0.20331	0.228832	-0.118704	0.232076	0.118218	0.117589	-0.164712	0.125519	0.164247	0.010439	-0.204587	0.0206944	0.205132	-0.0961301	-0.239703	-0.0832291	0.245684	-0.202051	-0.274574	-0.184134	0.294147
99666-4week-1-D.tif	0.352755	0.00543127	-0.278232	-0.195635	-0.264317	0.200097	0.243447	-0.111062	0.244196	0.116258	0.127353	-0.158995	0.132084	0.155804	0.0121805	-0.194136	0.0217947	0.190474	-0.100216	-0.232521	-0.0860412	0.22859	-0.21155	-0.272054	-0.193455	0.267749
99668-4week-1-D.tif	0.353357	0.00476051	-0.268381	-0.228331	-0.260121	0.201644	0.243534	-0.109666	0.245016	0.110224	0.124418	-0.152939	0.135158	0.157701	0.00744559	-0.187489	0.0243363	0.193798	-0.106776	-0.224882	-0.0856342	0.229588	-0.219057	-0.265456	-0.193296	0.271046
99669-4week-1-D.tif	0.35377	-0.00714224	-0.27722	-0.181787	-0.266526	0.215264	0.247621	-0.115368	0.239978	0.104613	0.13399	-0.161999	0.129222	0.157379	0.0180093	-0.189403	0.0172693	0.194065	-0.0933469	-0.231356	-0.0942468	0.226464	-0.204219	-0.273178	-0.2043	0.262448
99670-4week-1-D.tif	0.322694	0.00499961	-0.249038	-0.223914	-0.235612	0.22242	0.227874	-0.124687	0.222869	0.124053	0.119767	-0.174038	0.122963	0.175324	0.0127252	-0.213406	0.0189638	0.207082	-0.0957714	-0.246584	-0.0806079	0.248494	-0.20322	-0.281355	-0.183609	0.281611
99672-4week-1-D.tif	0.34471	0.00386157	-0.26896	-0.203346	-0.256186	0.215432	0.240419	-0.111848	0.234604	0.108562	0.1284	-0.163968	0.127729	0.159311	0.0160016	-0.202023	0.0194297	0.19618	-0.0967607	-0.235473	-0.0879711	0.232717	-0.207454	-0.272941	-0.193961	0.273535
99673-4week-1-D.tif	0.37947	-0.00828898	-0.297819	-0.171708	-0.296929	0.182937	0.263203	-0.102951	0.257238	0.0881531	0.14271	-0.148557	0.138654	0.139901	0.0210455	-0.176668	0.0192266	0.177519	-0.0981638	-0.211135	-0.0970975	0.221246	-0.216325	-0.248866	-0.215211	0.258418
99675-4week-1-D.tif	0.366206	0.00422499	-0.292004	-0.191781	-0.286184	0.161947	0.25116	-0.103492	0.253538	0.101243	0.132881	-0.1541	0.140979	0.151352	0.0140355	-0.18677	0.0275817	0.190875	-0.10328	-0.218941	-0.0861186	0.226879	-0.220416	-0.251065	-0.198379	0.269629
99676-4week-1-D.tif	0.333514	-0.00672693	-0.253102	-0.208736	-0.245431	0.233506	0.236138	-0.123516	0.223204	0.106671	0.127981	-0.171673	0.118251	0.161409	0.0176933	-0.20248	0.0141757	0.20637	-0.0891785	-0.241106	-0.0918075	0.242752	-0.195456	-0.279529	-0.195982	0.283058
99677-4week-1-D.tif	0.360044	-0.00620354	-0.2765	-0.191832	-0.265677	0.224692	0.252036	-0.113075	0.243949	0.102745	0.135456	-0.156976	0.128756	0.148732	0.0177811	-0.186132	0.0152391	0.187122	-0.0963163	-0.2251	-0.0970812	0.223628	-0.208617	-0.267611	-0.209071	0.260012
98678-4week-1-D.tif	0.357772	-0.0096464	-0.274824	-0.188024	-0.265087	0.228261	0.24938	-0.111234	0.242551	0.101767	0.133262	-0.15223	0.127467	0.14809	0.0189976	-0.188933	0.0139908	0.186107	-0.0917927	-0.23563	-0.0967408	0.226834	-0.205774	-0.26856	-0.209201	0.263196
99680-4week-1-D.tif	0.324201	0.00534663	-0.247602	-0.228186	-0.229812	0.232563	0.223799	-0.114543	0.224122	0.122679	0.116105	-0.168405	0.12159	0.169655	0.00972256	-0.211831	0.0191421	0.206377	-0.0972363	-0.250563	-0.080487	0.24697	-0.201816	-0.293228	-0.181727	0.283165
99681-4week-1-D.tif	0.335207	-0.0074862	-0.255316	-0.200036	-0.241785	0.240284	0.236935	-0.125501	0.226151	0.114102	0.12695	-0.169517	0.118144	0.163352	0.0179343	-0.204989	0.0105454	0.199734	-0.0902621	-0.240175	-0.0934713	0.238763	-0.193966	-0.286142	-0.197067	0.277611
99688-4week-1-D.tif	0.343954	0.00771259	-0.26359	-0.223464	-0.252997	0.20659	0.236517	-0.110248	0.238036	0.114833	0.121274	-0.158747	0.130372	0.160026	0.00849294	-0.197751	0.0228963	0.196803	-0.102368	-0.236005	-0.0837589	0.233284	-0.212337	-0.273921	-0.186492	0.280888
99689-4week-1-D.tif	0.337841	0.00148508	-0.263807	-0.211177	-0.246432	0.219518	0.233731	-0.113812	0.234437	0.118038	0.12272	-0.164694	0.130566	0.171389	0.0104055	-0.199884	0.0232149	0.205035	-0.0988097	-0.241179	-0.0864415	0.228928	-0.207366	-0.282242	-0.19006	0.268594
99690-4week-1-D.tif	0.346811	0.00258396	-0.270593	-0.200554	-0.258621	0.209734	0.242335	-0.118344	0.23924	0.117216	0.128436	-0.165769	0.129223	0.160518	0.0138522	-0.197285	0.0198815	0.195549	-0.098315	-0.232013	-0.0883321	0.230179	-0.208678	-0.270171	-0.195239	0.268357
99692-4week-1-D.tif	0.343843	-0.00161537	-0.263516	-0.215189	-0.262703	0.195405	0.235826	-0.111314	0.23589	0.106667	0.124164	-0.162191	0.127101	0.15405	0.0132489	-0.198933	0.022635	0.204674	-0.0973689	-0.230948	-0.0849446	0.242232	-0.204675	-0.27102	-0.189501	0.288184
99693-4week-1-D.tif	0.327149	-0.00171027	-0.248612	-0.215968	-0.237081	0.229788	0.230565	-0.129387	0.226762	0.127145	0.121412	-0.175078	0.120525	0.170618	0.0119517	-0.206418	0.0148736	0.204069	-0.09377	-0.244075	-0.0866505	0.243609	-0.198171	-0.283114	-0.188953	0.280521
99695-4week-1-D.tif	0.341343	0.00165094	-0.27129	-0.180095	-0.252158	0.218967	0.239897	-0.123074	0.232534	0.120043	0.126976	-0.166985	0.124355	0.165867	0.015818	-0.203027	0.01586	0.196583	-0.0930836	-0.242043	-0.0892962	0.229861	-0.199119	-0.287522	-0.191836	0.269775
99700-4week-1-D.tif	0.323363	-0.00110559	-0.24256	-0.224904	-0.239039	0.22497	0.226467	-0.124872	0.221896	0.11942	0.120279	-0.176563	0.119157	0.169156	0.0136429	-0.212353	0.0157996	0.207566	-0.0919123	-0.245945	-0.0859123	0.247927	-0.196635	-0.279211	-0.184547	0.295914
99708-4week-1-D.tif	0.333445	0.00139914	-0.256656	-0.216952	-0.253514	0.201351	0.234884	-0.125744	0.229065	0.116335	0.124215	-0.172553	0.126461	0.170839	0.0140776	-0.206211	0.0197089	0.204322	-0.0960618	-0.23498	-0.0849267	0.241897	-0.204051	-0.267833	-0.186646	0.28813
99710-4week-1-D.tif	0.367886	-0.00163483	-0.289865	-0.16175	-0.277013	0.216482	0.259074	-0.113704	0.248309	0.103291	0.140615	-0.157015	0.13098	0.146147	0.0220174	-0.188645	0.0149797	0.180483	-0.0941137	-0.227332	-0.0995017	0.214253	-0.210395	-0.262212	-0.212973	0.251635
99711-4week-1-D.tif	0.344684	0.00469266	-0.266314	-0.216585	-0.253091	0.208084	0.238664	-0.115251	0.238595	0.117401	0.12166	-0.156835	0.129743	0.160841	0.00858604	-0.194329	0.0220274	0.197001	-0.100863	-0.237204	-0.083633	0.235165	-0.211005	-0.276228	-0.189054	0.273247
99712-4week-1-D.tif	0.322447	-0.00471002	-0.242699	-0.23044	-0.238603	0.218307	0.223475	-0.125483	0.226972	0.126597	0.115561	-0.171364	0.124328	0.175572	0.0105308	-0.210807	0.0213352	0.214013	-0.0951619	-0.245283	-0.0827495	0.247565	-0.20051	-0.279624	-0.184926	0.285657
99716-4week-1-D.tif	0.36174	-0.000533231	-0.28766	-0.173247	-0.27123	0.208986	0.252154	-0.110784	0.246678	0.107196	0.134694	-0.155622	0.132963	0.153582	0.0171198	-0.188189	0.0192317	0.187166	-0.0974833	-0.229082	-0.0927532	0.220137	-0.210807	-0.272689	-0.204646	0.253078
99717-4week-1-D.tif	0.363499	-0.00304247	-0.286151	-0.171638	-0.276977	0.206649	0.255908	-0.114212	0.243657	0.0981813	0.13846	-0.156847	0.129705	0.14828	0.0216909	-0.190365	0.0156123	0.18506	-0.0943194	-0.223654	-0.0955113	0.225248	-0.207683	-0.26509	-0.207891	0.261431
99718-4week-1-D.tif	0.372381	0.00116683	-0.292933	-0.193453	-0.281729	0.187136	0.253995	-0.0971522	0.255887	0.0979126	0.131956	-0.141138	0.139174	0.142429	0.0122086	-0.177845	0.0245238	0.182973	-0.104494	-0.220046	-0.0886776	0.223049	-0.219905	-0.265093	-0.202387	0.260061
99719-4week-1-D.tif	0.339706	-0.00706214	-0.253034	-0.211333	-0.250215	0.228776	0.240538	-0.129381	0.230683	0.114142	0.127389	-0.168304	0.11915	0.157051	0.0169565	-0.201161	0.0117283	0.198249	-0.0920328	-0.233503	-0.09424	0.238845	-0.198527	-0.270051	-0.198103	0.283732
99723-4week-1-D.tif	0.350083	-0.00695733	-0.274654	-0.177112	-0.26408	0.214357	0.244121	-0.118603	0.238988	0.112263	0.129983	-0.160142	0.126519	0.157364	0.0182076	-0.196985	0.0158673	0.1935	-0.0914753	-0.237252	-0.0928607	0.228929	-0.200509	-0.277345	-0.20019	0.267984
99730-4week-1-D.tif	0.336605	-0.00389905	-0.26377	-0.193597	-0.25169	0.223194	0.236703	-0.120684	0.229469	0.113392	0.128382	-0.171137	0.123059	0.163158	0.0173652	-0.202156	0.0176572	0.204117	-0.0897798	-0.244094	-0.0884041	0.23974	-0.199034	-0.278599	-0.196562	0.270565
99736-4week-1-D.tif	0.357782	0.0134517	-0.280063	-0.216174	-0.270906	0.176976	0.245273	-0.104447	0.249517	0.111385	0.127704	-0.157891	0.138312	0.152432	0.00856875	-0.189849	0.0275654	0.189676	-0.108541	-0.221043	-0.0819433	0.230125	-0.2228	-0.258525	-0.19047	0.273882
99741-4week-1-D.tif	0.326637	-0.00261195	-0.253224	-0.212577	-0.247531	0.20958	0.226092	-0.122346	0.229447	0.126253	0.120216	-0.17534	0.12585	0.173969	0.0141749	-0.213675	0.0204819	0.207599	-0.0937375	-0.242887	-0.0826595	0.245299	-0.199783	-0.27632	-0.185965	0.283059
99742-4week-1-D.tif	0.323909	-0.00539099	-0.24979	-0.202626	-0.240232	0.234583	0.229042	-0.125139	0.220457	0.117195	0.127463	-0.184464	0.117991	0.170229	0.0194548	-0.214242	0.013802	0.208359	-0.0880339	-0.243824	-0.0892929	0.246004	-0.191743	-0.282979	-0.193027	0.282296
99745-4week-1-D.tif	0.329313	0.000872184	-0.255013	-0.224489	-0.249751	0.204063	0.228494	-0.115527	0.227162	0.111857	0.121152	-0.168765	0.128213	0.172639	0.0136386	-0.208926	0.0233032	0.208828	-0.0959717	-0.24115	-0.0800122	0.248883	-0.205546	-0.273363	-0.184981	0.285078
99748-4week-1-D.tif	0.383508	-0.00624019	-0.300244	-0.17362	-0.290712	0.202526	0.265891	-0.100165	0.260929	0.0920227	0.142364	-0.140446	0.138882	0.134591	0.020514	-0.177033	0.0210952	0.179464	-0.101665	-0.210621	-0.0991883	0.211182	-0.221458	-0.252623	-0.219916	0.240963
99751-4week-1-D.tif	0.358439	-0.00399172	-0.285318	-0.17759	-0.274899	0.198881	0.249376	-0.110458	0.244954	0.103801	0.133815	-0.156215	0.133969	0.156593	0.0188227	-0.192861	0.0210432	0.192005	-0.0956757	-0.22935	-0.0906582	0.226999	-0.210025	-0.265803	-0.203844	0.257988
99753-4week-1-D.tif	0.367815	0.00375486	-0.291615	-0.186931	-0.279682	0.193953	0.253554	-0.100748	0.253582	0.102922	0.136277	-0.155653	0.139865	0.151437	0.0157276	-0.186427	0.0235361	0.182821	-0.102915	-0.220166	-0.0911037	0.217209	-0.220152	-0.257066	-0.204889	0.254895
99754-4week-1-D.tif	0.372594	-0.0172567	-0.290497	-0.15562	-0.284036	0.218302	0.258386	-0.102069	0.252531	0.0944386	0.141554	-0.149676	0.132651	0.142315	0.0239019	-0.18382	0.0139017	0.179136	-0.0920091	-0.224261	-0.102836	0.215169	-0.206697	-0.267814	-0.219445	0.251157
99759-4week-1-D.tif	0.314617	-0.00173367	-0.247473	-0.203665	-0.229015	0.233548	0.220218	-0.125964	0.216498	0.127539	0.117515	-0.179352	0.116012	0.176735	0.0138321	-0.217261	0.0163844	0.214718	-0.087394	-0.259511	-0.0815347	0.251934	-0.188224	-0.301621	-0.181436	0.284633
99761-4week-1-D.tif	0.334662	0.000432595	-0.258502	-0.209563	-0.240777	0.230488	0.234098	-0.118603	0.227931	0.116151	0.123076	-0.165871	0.122542	0.165906	0.012565	-0.202082	0.0159823	0.200196	-0.0949266	-0.243845	-0.0863705	0.239977	-0.200389	-0.289071	-0.189892	0.275884
99764-4week-1-D.tif	0.354786	-0.0029944	-0.281487	-0.179434	-0.26213	0.216395	0.245435	-0.109286	0.242491	0.109791	0.128984	-0.151479	0.129735	0.154847	0.0156194	-0.192741	0.0197396	0.193376	-0.0964665	-0.236179	-0.0898531	0.226269	-0.206635	-0.284757	-0.200218	0.256192
99767-4week-1-D.tif	0.363337	-0.00562732	-0.284203	-0.18238	-0.27907	0.200123	0.250984	-0.104925	0.247451	0.0985678	0.135345	-0.155012	0.133085	0.147774	0.0191834	-0.189851	0.0185873	0.185358	-0.0959084	-0.224368	-0.0935528	0.226006	-0.209554	-0.262316	-0.205684	0.266651
99768-4week-1-D.tif	0.367807	-0.0184634	-0.284512	-0.168932	-0.292949	0.190345	0.256153	-0.110819	0.247361	0.0885849	0.141186	-0.157875	0.130915	0.143507	0.0243043	-0.183481	0.01402	0.184104	-0.0892429	-0.218655	-0.099444	0.230185	-0.202443	-0.253754	-0.213155	0.275253
99770-4week-1-D.tif	0.359888	-0.00187103	-0.276909	-0.202291	-0.276076	0.19268	0.250967	-0.115645	0.246916	0.105357	0.132984	-0.157808	0.133319	0.151165	0.0166628	-0.190635	0.0197652	0.188133	-0.0994435	-0.219009	-0.0918079	0.228826	-0.213777	-0.251186	-0.202488	0.272284
99772-4week-1-D.tif	0.365564	-0.00431929	-0.286498	-0.187152	-0.281171	0.189513	0.252238	-0.106585	0.249632	0.0989288	0.134166	-0.152077	0.134973	0.147883	0.0156145	-0.181476	0.020127	0.184563	-0.0983994	-0.222291	-0.0908214	0.228919	-0.212042	-0.263006	-0.203382	0.267098
99773-4week-1-D.tif	0.343201	0.000904976	-0.268243	-0.200933	-0.259109	0.205069	0.237696	-0.114441	0.235832	0.113573	0.126151	-0.165345	0.12725	0.159377	0.0145936	-0.201327	0.019937	0.198095	-0.0960817	-0.235245	-0.0857041	0.237821	-0.20426	-0.275069	-0.191263	0.277519
99776-4week-1-D.tif	0.322524	-0.0108839	-0.242926	-0.202414	-0.236365	0.246301	0.23288	-0.136757	0.214437	0.113343	0.127675	-0.180429	0.110089	0.165572	0.0226667	-0.214262	0.00680129	0.207248	-0.0818703	-0.247907	-0.093126	0.252326	-0.185851	-0.281367	-0.196934	0.28923
99779-4week-1-D.tif	0.321027	-0.00842146	-0.246498	-0.210762	-0.243228	0.221836	0.226061	-0.128798	0.219643	0.117078	0.121097	-0.175632	0.118873	0.172567	0.0177838	-0.214897	0.0177542	0.216128	-0.0863433	-0.249506	-0.0860352	0.250573	-0.191812	-0.279664	-0.188322	0.2895
90166_6w_G1_D.tif	0.332712	-0.0111933	-0.270591	-0.161389	-0.265523	0.187246	0.229403	-0.122226	0.232083	0.124022	0.124074	-0.174473	0.126629	0.174235	0.018867	-0.21267	0.0207925	0.209436	-0.0858455	-0.248897	-0.0830425	0.245186	-0.190677	-0.285325	-0.188883	0.276049
98431_6w_G1_D.tif	0.363912	-0.00935951	-0.296844	-0.158232	-0.292832	0.145723	0.246797	-0.104821	0.255481	0.111437	0.131665	-0.156875	0.141694	0.158967	0.0171487	-0.195036	0.0285754	0.198758	-0.0983173	-0.223686	-0.0853432	0.230543	-0.212423	-0.259804	-0.199512	0.262387
98435_6w_G1_D.tif	0.353866	-0.0140034	-0.285666	-0.17142	-0.290457	0.133337	0.241343	-0.116703	0.247903	0.111295	0.128359	-0.162149	0.137926	0.165418	0.0176983	-0.199307	0.0275341	0.207905	-0.0936664	-0.227174	-0.0840515	0.241911	-0.206254	-0.251718	-0.194534	0.282607
98436_6w_G1_D.tif	0.334286	-0.000479913	-0.274886	-0.190295	-0.263677	0.157745	0.225999	-0.116866	0.238872	0.131911	0.116811	-0.168235	0.135363	0.179522	0.00992108	-0.209469	0.0312425	0.215037	-0.0979321	-0.24212	-0.0734383	0.244774	-0.204896	-0.278676	-0.177667	0.277152
98437_6w_G1_D.tif	0.352627	-0.0083336	-0.280747	-0.187715	-0.277695	0.17241	0.240384	-0.114169	0.250558	0.122035	0.127048	-0.162079	0.138973	0.166145	0.0145811	-0.198085	0.0270953	0.200513	-0.0985965	-0.227223	-0.0854467	0.230097	-0.211651	-0.257164	-0.197131	0.26357
98443_6w_G1_D.tif	0.352444	-0.0151824	-0.281168	-0.16779	-0.282846	0.17105	0.241924	-0.118586	0.247062	0.117882	0.129982	-0.16479	0.133476	0.160757	0.0188226	-0.198769	0.0230654	0.202265	-0.0923626	-0.227956	-0.0880441	0.236405	-0.202307	-0.263186	-0.200048	0.267902
98446_6w_G1_D.tif	0.362325	0.000253026	-0.293829	-0.191555	-0.284933	0.147947	0.243765	-0.100979	0.258668	0.116956	0.128573	-0.158197	0.147106	0.163719	0.0104736	-0.189787	0.0337638	0.198105	-0.106622	-0.220517	-0.0803321	0.228428	-0.223937	-0.25184	-0.195021	0.257467
98450_6w_G1_D.tif	0.364044	-0.0122407	-0.289775	-0.146909	-0.292943	0.178702	0.25552	-0.119889	0.246816	0.100782	0.14034	-0.162299	0.131835	0.151418	0.0260608	-0.196578	0.0180722	0.193483	-0.0887794	-0.224467	-0.0967166	0.227158	-0.20342	-0.253119	-0.211054	0.263959
98451_6w_G1_D.tif	0.354846	-0.0117504	-0.282969	-0.16548	-0.283053	0.178603	0.245263	-0.117761	0.247018	0.114594	0.132952	-0.1661	0.133796	0.159979	0.0200507	-0.197732	0.0214707	0.197088	-0.0918762	-0.229112	-0.0905208	0.231274	-0.204156	-0.259155	-0.20282	0.265552
98453_6w_G1_D.tif	0.366736	-0.0143916	-0.292221	-0.133091	-0.292153	0.191009	0.258862	-0.123175	0.249282	0.105505	0.143532	-0.165289	0.132765	0.154864	0.0276893	-0.195904	0.0159653	0.189588	-0.0889515	-0.221227	-0.0999754	0.221218	-0.203734	-0.256993	-0.217796	0.247888
98459_6w_G1_D.tif	0.373245	-0.00718918	-0.294809	-0.187049	-0.29674	0.162328	0.257011	-0.104651	0.259259	0.0971875	0.138965	-0.1546	0.145022	0.154332	0.0190728	-0.185246	0.0256367	0.185413	-0.101759	-0.209278	-0.0917923	0.22384	-0.222611	-0.233849	-0.2105	0.258761
98462_6w_G1_D.tif	0.376669	-0.0100402	-0.300759	-0.170948	-0.298275	0.161532	0.257194	-0.0999255	0.260998	0.0965376	0.136957	-0.14533	0.144948	0.152138	0.0177471	-0.181071	0.0251825	0.182899	-0.100851	-0.214937	-0.0916507	0.220972	-0.21924	-0.249595	-0.208921	0.257767
98463_6w_G1_D.tif	0.372238	-0.00339574	-0.296771	-0.176948	-0.294217	0.160733	0.255972	-0.106301	0.25786	0.101889	0.136405	-0.152322	0.14221	0.150868	0.0176869	-0.186385	0.0252873	0.186069	-0.10117	-0.214639	-0.0903974	0.223276	-0.219293	-0.245351	-0.205811	0.262506
98467_6w_G1_D.tif	0.33041	-0.00931229	-0.27038	-0.17027	-0.268448	0.168171	0.22778	-0.124124	0.230622	0.122037	0.123242	-0.177539	0.126862	0.17303	0.017817	-0.212247	0.025929	0.221651	-0.0866888	-0.246706	-0.0792038	0.252008	-0.192696	-0.277811	-0.185244	0.281112
98484_6w_G1_D.tif	0.365572	0.000783407	-0.293762	-0.190238	-0.28546	0.166913	0.248606	-0.0993487	0.257166	0.107512	0.131484	-0.151622	0.14459	0.155746	0.0140114	-0.189043	0.0300936	0.190979	-0.103171	-0.224509	-0.0841144	0.227169	-0.223868	-0.248889	-0.201147	0.254548
98495_6w_G1_D.tif	0.317465	-0.00509962	-0.257604	-0.20532	-0.252962	0.171706	0.213697	-0.117394	0.226004	0.128026	0.112659	-0.176439	0.127935	0.182165	0.0113863	-0.218511	0.0302087	0.227577	-0.0917999	-0.25103	-0.0705073	0.26069	-0.19421	-0.287767	-0.172272	0.291396
98501_6w_G1_D.tif	0.348957	-0.0113081	-0.276254	-0.189077	-0.272989	0.186449	0.238894	-0.111292	0.242503	0.108916	0.126801	-0.158008	0.133972	0.163634	0.0164818	-0.197823	0.0243726	0.203701	-0.0945381	-0.232141	-0.086478	0.235772	-0.204988	-0.26877	-0.196735	0.269946
98503_6w_G1_D.tif	0.316563	-0.0294213	-0.251087	-0.144821	-0.262814	0.208491	0.222733	-0.135919	0.217419	0.119444	0.126342	-0.190014	0.115661	0.179839	0.0283327	-0.225869	0.0120265	0.219853	-0.0697944	-0.259308	-0.0914107	0.254834	-0.169031	-0.288422	-0.19494	0.291314
98505_6w_G1_D.tif	0.335988	-0.013522	-0.268491	-0.168293	-0.264395	0.203543	0.232853	-0.11968	0.232441	0.116715	0.127128	-0.172038	0.12647	0.170599	0.0209749	-0.210645	0.0183069	0.205386	-0.0852493	-0.246286	-0.088425	0.239653	-0.19205	-0.279494	-0.195551	0.274062
98524_6w_G1_D.tif	0.364522	-0.0132253	-0.28953	-0.163118	-0.290133	0.180505	0.251253	-0.106118	0.249505	0.0975539	0.13677	-0.156125	0.135163	0.150458	0.0216895	-0.190408	0.0209054	0.191708	-0.0923232	-0.225645	-0.0933406	0.228386	-0.206698	-0.259198	-0.207784	0.265226
98528_6w_G1_D.tif	0.344	-0.00990412	-0.279296	-0.17449	-0.277752	0.161078	0.233229	-0.110673	0.242119	0.116628	0.125589	-0.168672	0.134736	0.168011	0.0165905	-0.205557	0.0277883	0.21088	-0.092823	-0.236205	-0.0816419	0.241467	-0.20216	-0.268607	-0.190378	0.276046
98532_6w_G1_D.tif	0.382016	-0.00287606	-0.306604	-0.174717	-0.298746	0.162441	0.257556	-0.0848787	0.264518	0.089665	0.135929	-0.136432	0.146491	0.139545	0.0164489	-0.181656	0.02999	0.18675	-0.104722	-0.215629	-0.0899314	0.216215	-0.225035	-0.252876	-0.20791	0.25445
98536_6w_G1_D.tif	0.36436	-0.0209185	-0.288938	-0.135172	-0.295261	0.185351	0.253857	-0.111592	0.247002	0.0960501	0.140867	-0.160289	0.131223	0.14935	0.0274317	-0.19527	0.0177243	0.195818	-0.0854913	-0.230339	-0.0994177	0.225027	-0.199133	-0.261159	-0.214223	0.263143
98549_6w_G1_D.tif	0.345128	-0.0210132	-0.264167	-0.184436	-0.273036	0.207245	0.240361	-0.119626	0.233925	0.100983	0.131342	-0.163819	0.122268	0.152821	0.0244375	-0.20301	0.0128516	0.197832	-0.0835625	-0.23451	-0.0936974	0.246511	-0.191853	-0.264496	-0.203998	0.285518
98555_6w_G1_D.tif	0.318137	-0.012685	-0.255439	-0.174659	-0.254184	0.202224	0.22215	-0.130298	0.219719	0.123732	0.1213	-0.181677	0.119155	0.178567	0.0222895	-0.226094	0.0176084	0.217467	-0.0801892	-0.25497	-0.0830504	0.254698	-0.18225	-0.285868	-0.185247	0.289563
98557_6w_G1_D.tif	0.362828	-0.0108691	-0.289156	-0.170287	-0.293116	0.156454	0.250748	-0.11561	0.251079	0.1056	0.135702	-0.16227	0.136786	0.153865	0.0206222	-0.193616	0.0239579	0.198	-0.0952524	-0.216996	-0.0899874	0.23421	-0.209655	-0.247449	-0.204556	0.268968
98563_6w_G1_D.tif	0.349845	-0.0224665	-0.280471	-0.139335	-0.287277	0.175465	0.241662	-0.11783	0.242499	0.112489	0.133433	-0.170104	0.130203	0.162706	0.0247801	-0.20666	0.019771	0.204788	-0.0847197	-0.234986	-0.0921898	0.236286	-0.193365	-0.269328	-0.204171	0.268977
98568_6w_G1_D.tif	0.361541	-0.0102677	-0.285459	-0.185747	-0.284211	0.175754	0.245808	-0.104628	0.252396	0.106526	0.130449	-0.152954	0.138479	0.154527	0.0164382	-0.191443	0.0247299	0.193007	-0.0981275	-0.223356	-0.0883257	0.230304	-0.211917	-0.258105	-0.201802	0.266382
98575_6w_G1_D.tif	0.356296	-0.00493752	-0.277782	-0.195147	-0.27578	0.18937	0.243204	-0.10832	0.249046	0.112094	0.127656	-0.154277	0.135069	0.153192	0.0162287	-0.198199	0.0234545	0.193038	-0.0970387	-0.230386	-0.0891435	0.22781	-0.211887	-0.25587	-0.199324	0.271634
98578_6w_G1_D.tif	0.346905	-0.0103295	-0.280373	-0.161258	-0.282437	0.168965	0.241431	-0.120094	0.239188	0.110577	0.133026	-0.173784	0.13158	0.166384	0.023489	-0.209593	0.0222329	0.205685	-0.0887966	-0.230825	-0.0876536	0.240195	-0.199859	-0.258662	-0.198732	0.272741
98583_6w_G1_D.tif	0.350377	-0.0114765	-0.283081	-0.159322	-0.280738	0.17809	0.240543	-0.109623	0.241773	0.107566	0.130163	-0.161371	0.13228	0.160865	0.0211784	-0.205193	0.023284	0.203455	-0.0894471	-0.2383	-0.0876826	0.235146	-0.200522	-0.270128	-0.198128	0.270291
98586_6w_G1_D.tif	0.357011	-0.00118897	-0.286735	-0.138023	-0.282216	0.198127	0.256121	-0.124971	0.234089	0.0952992	0.143578	-0.173665	0.124486	0.153805	0.028767	-0.201498	0.0130045	0.192471	-0.0852463	-0.230574	-0.0973964	0.228893	-0.197664	-0.265618	-0.207799	0.266941
98589_6W_G1_D.tif	0.335844	-0.0121414	-0.26952	-0.175389	-0.270928	0.185315	0.230463	-0.113628	0.233207	0.112557	0.127394	-0.175941	0.127982	0.167018	0.0208987	-0.21209	0.0230178	0.211888	-0.0864006	-0.242296	-0.0846654	0.245913	-0.194375	-0.27133	-0.192918	0.280123
98594_6w_G1_D.tif	0.342979	-0.0144552	-0.273291	-0.172281	-0.279939	0.178477	0.238794	-0.116613	0.232403	0.0979896	0.132301	-0.170447	0.126729	0.159987	0.0248185	-0.208073	0.0213537	0.211918	-0.0847888	-0.235084	-0.0882064	0.24751	-0.194818	-0.262204	-0.198334	0.283277
98595_6w_G1_D.tif	0.320159	-0.0144624	-0.257457	-0.184093	-0.26003	0.185568	0.221361	-0.128912	0.226036	0.12686	0.120901	-0.183515	0.12638	0.18441	0.0195065	-0.221634	0.023647	0.222513	-0.084289	-0.248734	-0.0816767	0.250916	-0.18895	-0.274415	-0.185589	0.285499
98597_6w_G1_D.tif	0.332132	0.00683414	-0.269688	-0.20172	-0.255299	0.185146	0.228796	-0.113755	0.230606	0.117897	0.1193	-0.165778	0.130406	0.17346	0.0123868	-0.210373	0.027636	0.211353	-0.0958412	-0.247258	-0.0759207	0.244374	-0.205387	-0.280362	-0.179126	0.280183
98600_6w_G1_D.tif	0.337396	-0.0133467	-0.263316	-0.208798	-0.267945	0.177633	0.228166	-0.116565	0.242125	0.123903	0.120575	-0.167479	0.135565	0.173571	0.0137295	-0.206075	0.0271831	0.209927	-0.0952495	-0.234364	-0.0817069	0.243974	-0.20546	-0.260043	-0.19106	0.277661
98616_6w_G1_D.tif	0.340538	-0.0194931	-0.271494	-0.152066	-0.276657	0.19799	0.238338	-0.116255	0.228691	0.0986497	0.134436	-0.174289	0.122411	0.160005	0.0282909	-0.212318	0.016965	0.210091	-0.0797938	-0.240856	-0.0919551	0.24571	-0.18705	-0.274874	-0.202721	0.277703
98617_6w_G1_D.tif	0.347928	-0.00633951	-0.280184	-0.168804	-0.276549	0.180173	0.241318	-0.118022	0.240772	0.114248	0.130507	-0.16763	0.131557	0.163411	0.0200351	-0.204513	0.0220105	0.200538	-0.0910011	-0.235403	-0.0867059	0.236988	-0.202638	-0.264402	-0.19705	0.269755
98618_6w_G1_D.tif	0.381398	-0.0144368	-0.300196	-0.15811	-0.301787	0.189394	0.262811	-0.0921144	0.25962	0.0845392	0.146024	-0.152145	0.140623	0.139589	0.02562	-0.184977	0.0203195	0.18043	-0.0956848	-0.211423	-0.101684	0.212434	-0.215295	-0.245067	-0.221768	0.251887
98619_6w_G1_D.tif	0.354243	-0.0120673	-0.282593	-0.172487	-0.283802	0.175904	0.243765	-0.111332	0.245454	0.106741	0.131982	-0.161117	0.13442	0.158713	0.021242	-0.201666	0.022967	0.198989	-0.0918977	-0.22943	-0.0885626	0.236188	-0.205279	-0.257256	-0.201939	0.268821
98637_6w_G1_D.tif	0.384427	-0.0176873	-0.302552	-0.169747	-0.302881	0.177681	0.260877	-0.0879938	0.26516	0.0864803	0.140499	-0.137748	0.144689	0.139255	0.0208584	-0.178733	0.0243667	0.18173	-0.100291	-0.209862	-0.0973994	0.214715	-0.219584	-0.249194	-0.218169	0.251104
98638_6w_G1_D.tif	0.371574	-0.00334304	-0.296529	-0.184332	-0.293236	0.157097	0.25226	-0.0986673	0.259287	0.100872	0.133191	-0.147789	0.144403	0.150889	0.0157089	-0.18708	0.0282543	0.188218	-0.102691	-0.217698	-0.0876687	0.224445	-0.2215	-0.246769	-0.203052	0.264157
98640_6w_G1_D.tif	0.348501	-0.00284329	-0.285491	-0.175196	-0.273413	0.171996	0.235445	-0.102981	0.24464	0.115168	0.124067	-0.157495	0.136673	0.16482	0.014059	-0.201839	0.0287992	0.203873	-0.0964369	-0.240554	-0.0796014	0.236952	-0.207661	-0.277613	-0.18958	0.265713
98643_6w_G1_D.tif	0.367	-0.0142501	-0.294737	-0.138056	-0.294665	0.180724	0.254515	-0.108018	0.251915	0.101996	0.140368	-0.160498	0.136741	0.154413	0.0253972	-0.197723	0.0206506	0.191584	-0.090755	-0.226407	-0.0966321	0.220282	-0.206564	-0.257213	-0.213234	0.253166
98645_6w_G1_D.tif	0.363625	-0.011317	-0.290213	-0.168631	-0.287212	0.177981	0.249404	-0.106248	0.251573	0.103559	0.133609	-0.1527	0.13798	0.155554	0.0193122	-0.192002	0.0231708	0.191875	-0.095364	-0.226018	-0.0908235	0.226599	-0.210032	-0.260036	-0.205031	0.261385
98647_6w_G1_D.tif	0.351784	-0.0219221	-0.277863	-0.16902	-0.279363	0.189328	0.240927	-0.112935	0.245258	0.110585	0.130903	-0.163093	0.133129	0.163199	0.0200078	-0.19697	0.0206046	0.20101	-0.0911212	-0.226747	-0.0919779	0.232551	-0.198649	-0.272123	-0.203639	0.266136
98648_6w_G1_D.tif	0.35141	-0.0193929	-0.277895	-0.157499	-0.284173	0.180948	0.245637	-0.12729	0.240946	0.109519	0.134007	-0.167436	0.129032	0.161818	0.0231783	-0.197645	0.0178235	0.202331	-0.0860406	-0.230722	-0.0942774	0.23419	-0.19549	-0.262516	-0.204159	0.273695
98650_6w_G1_D.tif	0.339077	-0.00499944	-0.282071	-0.156797	-0.277085	0.146905	0.233802	-0.121706	0.236415	0.119883	0.126395	-0.175867	0.131968	0.173897	0.01819	-0.210713	0.0276656	0.217467	-0.0900776	-0.24107	-0.078796	0.248229	-0.198948	-0.271575	-0.186535	0.276345
98656_6w_G1_D.tif	0.365699	-0.0107955	-0.288406	-0.167404	-0.290386	0.176632	0.253901	-0.11652	0.251718	0.106152	0.137094	-0.159307	0.135148	0.151219	0.0211658	-0.190957	0.0199079	0.18944	-0.0944305	-0.218605	-0.0946677	0.225378	-0.208652	-0.251017	-0.208091	0.265785
98657_6w_G1_D.tif	0.373478	-0.00827363	-0.298723	-0.149789	-0.293337	0.186917	0.260027	-0.106878	0.254337	0.0974738	0.142172	-0.154685	0.137583	0.148397	0.0237929	-0.189307	0.01998	0.18436	-0.0953129	-0.218411	-0.096777	0.218138	-0.212452	-0.256468	-0.214767	0.248524
98663_6w_G1_D.tif	0.366941	-0.0167416	-0.29031	-0.163313	-0.293763	0.177125	0.252731	-0.105442	0.250964	0.0945508	0.137269	-0.152076	0.136107	0.149868	0.0231703	-0.191951	0.0204429	0.190263	-0.092371	-0.221657	-0.0943859	0.228868	-0.206982	-0.25564	-0.209815	0.266146
98672_6w_G1_D.tif	0.362974	-0.0113972	-0.286053	-0.178501	-0.289439	0.170115	0.249629	-0.112575	0.252569	0.107507	0.134278	-0.159645	0.138209	0.15639	0.0188542	-0.191366	0.0224843	0.190861	-0.0959159	-0.220188	-0.0918598	0.227303	-0.210844	-0.247859	-0.204884	0.269355
98675_6w_G1_D.tif	0.313336	0.000554855	-0.25418	-0.212004	-0.244227	0.184927	0.20928	-0.112558	0.223957	0.131013	0.109475	-0.175786	0.127379	0.183486	0.0090781	-0.220973	0.0300314	0.224301	-0.0921191	-0.259627	-0.0687523	0.258843	-0.195006	-0.294788	-0.168253	0.29261
98683_6w_G1_D.tif	0.318562	-0.0118354	-0.258859	-0.192144	-0.257212	0.16727	0.215112	-0.125794	0.2292	0.136345	0.113242	-0.179579	0.128591	0.186432	0.0107994	-0.214303	0.0285588	0.226736	-0.0890933	-0.25206	-0.0735507	0.256197	-0.19057	-0.286473	-0.174779	0.28921
98684_6w_G1_D.tif	0.384682	-0.00529417	-0.310446	-0.152906	-0.302072	0.167989	0.261788	-0.0887934	0.265449	0.0929929	0.139362	-0.137014	0.145997	0.142055	0.0195348	-0.183321	0.0257221	0.176942	-0.101544	-0.219198	-0.0932452	0.212484	-0.222702	-0.254043	-0.212524	0.248106
98685_6w_G1_D.tif	0.366348	-0.0124297	-0.294078	-0.160273	-0.295305	0.163221	0.251927	-0.106229	0.253246	0.100713	0.13774	-0.160308	0.139578	0.155876	0.021957	-0.194204	0.0242841	0.194815	-0.0953889	-0.217767	-0.0918157	0.227104	-0.210684	-0.251518	-0.207809	0.261
98690_6w_G1_D.tif	0.332267	-0.00529944	-0.273131	-0.153294	-0.264891	0.189242	0.23313	-0.12805	0.229252	0.123664	0.128174	-0.182109	0.126209	0.177826	0.0213494	-0.216092	0.0206101	0.211284	-0.0855187	-0.247345	-0.0848023	0.240614	-0.191973	-0.280944	-0.190675	0.270501
98709_6w_G1_D.tif	0.363194	-0.00961995	-0.284726	-0.180521	-0.285373	0.178848	0.253373	-0.122221	0.250483	0.108434	0.134388	-0.156468	0.135253	0.154375	0.0179034	-0.185794	0.0211402	0.192934	-0.0956856	-0.221251	-0.0932809	0.225989	-0.210755	-0.250177	-0.205914	0.265473
98711_6w_G1_D.tif	0.384558	-0.00527083	-0.30674	-0.169285	-0.300832	0.173122	0.263824	-0.0939689	0.265133	0.0913204	0.142819	-0.147072	0.147075	0.146049	0.0192784	-0.177839	0.0256123	0.17922	-0.103951	-0.207159	-0.0956399	0.209946	-0.225251	-0.244128	-0.215886	0.245065
98715_6w_G1_D.tif	0.35511	-0.0070766	-0.281916	-0.200728	-0.278161	0.163181	0.238534	-0.107739	0.255545	0.124029	0.124369	-0.15847	0.144409	0.169529	0.0104389	-0.19436	0.0304644	0.197831	-0.104214	-0.223105	-0.0821664	0.229419	-0.217985	-0.255254	-0.194429	0.262744
98716_6w_G1_D.tif	0.35123	-0.0148288	-0.279437	-0.184859	-0.281436	0.164369	0.238445	-0.112272	0.247489	0.113632	0.127023	-0.161987	0.137788	0.167104	0.0157081	-0.196891	0.0265963	0.205013	-0.0957481	-0.226579	-0.0856526	0.235434	-0.206074	-0.261203	-0.195931	0.273068
98724_6w_G1_D2.tif	0.364939	-0.0104473	-0.286311	-0.177559	-0.28884	0.179932	0.254862	-0.116743	0.249312	0.0995084	0.138447	-0.160354	0.134873	0.151331	0.0208535	-0.186579	0.0204851	0.192809	-0.0949134	-0.216354	-0.0946352	0.227814	-0.209954	-0.24865	-0.209119	0.265293
98727_6w_G1_D.tif	0.376026	-0.000257975	-0.298982	-0.176769	-0.294824	0.170379	0.258565	-0.0994693	0.258435	0.0947735	0.138722	-0.150038	0.14225	0.145452	0.0184394	-0.184289	0.0243733	0.181262	-0.101301	-0.215408	-0.0925855	0.21811	-0.220992	-0.24546	-0.208127	0.261715
98729_6w_G1_D.tif	0.367223	-0.00742206	-0.291101	-0.180625	-0.290545	0.175172	0.250847	-0.0971075	0.252417	0.0927527	0.135939	-0.152646	0.138624	0.146481	0.0194592	-0.188843	0.0246969	0.191022	-0.0969404	-0.221961	-0.09021	0.229735	-0.214183	-0.252288	-0.206227	0.265729
98731_6w_G1_D.tif	0.381702	-0.0120268	-0.296362	-0.187367	-0.300379	0.173297	0.260244	-0.0970384	0.264608	0.0927019	0.139663	-0.145155	0.144466	0.14102	0.0185479	-0.17733	0.023837	0.179554	-0.10205	-0.206859	-0.0964383	0.21705	-0.222299	-0.23689	-0.21554	0.259044
98741_6w_G1_D.tif	0.356237	-0.00751328	-0.286993	-0.164564	-0.283072	0.180583	0.246178	-0.107379	0.243892	0.101216	0.135074	-0.164279	0.133823	0.156883	0.0211688	-0.197453	0.0230018	0.199069	-0.0924816	-0.229265	-0.0891192	0.232932	-0.205426	-0.26475	-0.202284	0.264519
98744_6w_G1_D.tif	0.390817	-0.0092073	-0.309578	-0.163193	-0.305676	0.178007	0.267038	-0.0863005	0.266998	0.0820571	0.143912	-0.135957	0.145414	0.133793	0.0210487	-0.174443	0.0236434	0.174344	-0.101729	-0.20984	-0.0982887	0.209922	-0.223893	-0.247006	-0.219707	0.247824
98749_6w_G1_D.tif	0.354098	-0.0038612	-0.283623	-0.182457	-0.278486	0.177842	0.242545	-0.106977	0.24657	0.109578	0.13162	-0.165869	0.136571	0.160327	0.0164887	-0.195791	0.0253644	0.198091	-0.0972016	-0.227173	-0.0861243	0.232126	-0.209982	-0.262063	-0.197842	0.266226
98752_6w_G1_D.tif	0.343588	-0.0215624	-0.270306	-0.165473	-0.275656	0.195962	0.237398	-0.11836	0.23709	0.110166	0.13069	-0.170194	0.126668	0.162438	0.0225939	-0.203047	0.0165148	0.201848	-0.0841965	-0.23773	-0.0920212	0.240683	-0.190981	-0.272413	-0.20138	0.277682
98756_6w_G1_D.tif	0.386905	-0.016206	-0.306507	-0.159811	-0.308657	0.167845	0.264603	-0.0921309	0.266183	0.0860207	0.143689	-0.141902	0.145765	0.140798	0.0223406	-0.177501	0.0236814	0.179155	-0.0990718	-0.209565	-0.0983419	0.213977	-0.220522	-0.241486	-0.220066	0.250806
98760_6w_G1_D.tif	0.347809	-0.0221115	-0.273793	-0.142709	-0.277619	0.210068	0.248349	-0.132446	0.233086	0.103751	0.139615	-0.173722	0.12339	0.162837	0.0296947	-0.20271	0.0115286	0.201155	-0.0797018	-0.23522	-0.100043	0.23438	-0.189134	-0.267741	-0.21318	0.264467
98762_6w_G1_D.tif	0.380677	-0.00674776	-0.303462	-0.17008	-0.298863	0.170696	0.260415	-0.0968139	0.263752	0.0963682	0.139991	-0.147027	0.144854	0.144009	0.018227	-0.178604	0.0261469	0.183477	-0.102092	-0.212994	-0.0935427	0.215811	-0.222686	-0.246291	-0.213418	0.248195
98777_6w_G1_D.tif	0.375714	-0.00388983	-0.298927	-0.177345	-0.295628	0.167014	0.256269	-0.0952002	0.258782	0.0925641	0.136955	-0.146387	0.142776	0.145151	0.018026	-0.18428	0.0254929	0.183787	-0.101124	-0.216266	-0.0913409	0.22107	-0.219815	-0.249324	-0.207181	0.263105
98778_6w_G1_D.tif	0.385347	-0.0170285	-0.305491	-0.155249	-0.304239	0.184628	0.264234	-0.0892924	0.264225	0.0850689	0.14502	-0.14416	0.144263	0.140423	0.0232	-0.176796	0.0228532	0.180244	-0.097636	-0.213627	-0.0999183	0.21143	-0.218942	-0.248323	-0.222915	0.242684
98780_6w_G1_D2.tif	0.347146	-0.0174949	-0.276143	-0.150471	-0.279893	0.198238	0.245848	-0.122943	0.232129	0.0978331	0.138256	-0.173084	0.125114	0.161423	0.0285667	-0.205363	0.0157371	0.204817	-0.0816678	-0.235134	-0.0955342	0.238074	-0.191836	-0.266197	-0.207722	0.2703
98789_6w_G1_D.tif	0.367484	-0.00829749	-0.295948	-0.161963	-0.287505	0.185798	0.251644	-0.0983927	0.25482	0.10216	0.13746	-0.157908	0.141127	0.155566	0.0188062	-0.18724	0.0253194	0.191693	-0.0975729	-0.224805	-0.0924997	0.217188	-0.214108	-0.261795	-0.209028	0.247996
98794_6w_G1_D.tif	0.347484	-0.00451966	-0.285774	-0.183741	-0.277641	0.131417	0.232256	-0.110154	0.248683	0.125911	0.120192	-0.162594	0.141248	0.173911	0.00918854	-0.199525	0.0330396	0.209425	-0.101135	-0.232015	-0.074646	0.243224	-0.210596	-0.269067	-0.1823	0.277726
98812_6w_G1_D.tif	0.346622	-0.0196782	-0.275643	-0.154777	-0.281694	0.183798	0.241654	-0.121371	0.235706	0.104283	0.13332	-0.169552	0.126812	0.162501	0.0246296	-0.203308	0.0173602	0.204651	-0.083752	-0.234858	-0.092241	0.24049	-0.191334	-0.270494	-0.201439	0.278316
98836_6w_G1_D.tif	0.35196	-0.00391162	-0.278102	-0.194124	-0.275861	0.178806	0.241375	-0.109653	0.244122	0.107854	0.128267	-0.159657	0.134875	0.159551	0.0162764	-0.198369	0.0240114	0.196716	-0.0966658	-0.229175	-0.0854922	0.236188	-0.209521	-0.259957	-0.195245	0.275733
98840_6w_G1_D.tif	0.370658	-0.015826	-0.292214	-0.158484	-0.295292	0.185061	0.257582	-0.107622	0.251557	0.0918002	0.140812	-0.152015	0.135816	0.147974	0.0250072	-0.189508	0.0178808	0.184776	-0.091348	-0.221302	-0.097983	0.224072	-0.207975	-0.251238	-0.214501	0.262313
98844_6w_G1_D.tif	0.360048	-0.00869226	-0.291062	-0.159691	-0.288601	0.165523	0.247737	-0.110137	0.249137	0.106497	0.133962	-0.16095	0.137026	0.158322	0.0195449	-0.194612	0.0246224	0.198034	-0.0937715	-0.228865	-0.0887968	0.229802	-0.208012	-0.259766	-0.201834	0.264535
98849_6w_G1_D.tif	0.389832	-0.0074156	-0.310946	-0.164039	-0.309744	0.153614	0.264901	-0.088392	0.268927	0.0864137	0.141524	-0.137355	0.147758	0.13653	0.0198488	-0.178507	0.026567	0.177529	-0.103052	-0.208454	-0.0949859	0.213479	-0.225471	-0.239985	-0.215159	0.256582
98854_6w_G1_D.tif	0.356877	-0.0163104	-0.28542	-0.162642	-0.285933	0.174142	0.245392	-0.111964	0.246497	0.105726	0.132698	-0.159423	0.134605	0.160007	0.0206495	-0.19621	0.021992	0.198718	-0.0921314	-0.226158	-0.0899112	0.234067	-0.202668	-0.2667	-0.202648	0.266748
98857_6w_G1_D.tif	0.383032	-0.0131255	-0.29902	-0.17511	-0.300835	0.183448	0.262407	-0.0935084	0.262205	0.0858738	0.142129	-0.142473	0.142021	0.137178	0.0219112	-0.179476	0.0216304	0.178109	-0.0988869	-0.210557	-0.0986714	0.216187	-0.219276	-0.242454	-0.218647	0.255909
98863_6w_G1_D.tif	0.340529	-0.0136204	-0.27203	-0.18117	-0.272246	0.179035	0.233978	-0.117603	0.236644	0.112608	0.12637	-0.169358	0.131395	0.171468	0.0175526	-0.202855	0.0232517	0.209275	-0.0904286	-0.235665	-0.0851858	0.241683	-0.197501	-0.272398	-0.192329	0.2786
98865_6w_G1_D.tif	0.3231	-0.0095176	-0.264959	-0.18954	-0.2626	0.159691	0.216424	-0.114299	0.230338	0.126241	0.115526	-0.176199	0.130581	0.18204	0.013225	-0.21668	0.0288745	0.220834	-0.0899616	-0.249632	-0.0716171	0.26082	-0.193413	-0.284224	-0.175516	0.290465
98872_6w_G1_D.tif	0.310249	-0.0248407	-0.247251	-0.171088	-0.257899	0.200245	0.216202	-0.131916	0.213045	0.116611	0.120528	-0.185515	0.115894	0.18104	0.0252223	-0.228224	0.0171727	0.227483	-0.071721	-0.262404	-0.0840343	0.263847	-0.171769	-0.286672	-0.185639	0.301434
98875_6w_G1_D.tif	0.342302	-0.00997449	-0.278552	-0.171391	-0.278075	0.154786	0.233991	-0.11687	0.238584	0.114356	0.124459	-0.165332	0.132477	0.169006	0.0174942	-0.206925	0.0262118	0.211466	-0.0904136	-0.239497	-0.0809301	0.246525	-0.199424	-0.269271	-0.188124	0.283122
98876_6w_G1_D.tif	0.362847	-0.0172545	-0.289274	-0.160829	-0.290306	0.177826	0.250132	-0.106551	0.247548	0.094292	0.135543	-0.151908	0.135372	0.15439	0.0225887	-0.192847	0.0218936	0.197004	-0.0914869	-0.226093	-0.0928249	0.230085	-0.20486	-0.263144	-0.207173	0.265029
98885_6w_G1_D.tif	0.364349	-0.00778656	-0.290256	-0.174445	-0.285501	0.180423	0.250896	-0.106251	0.250564	0.100547	0.134881	-0.154838	0.137798	0.154852	0.0181155	-0.187482	0.0230075	0.191058	-0.0970022	-0.223107	-0.0907723	0.226164	-0.211537	-0.260688	-0.204543	0.261555
98887_6w_G1_D.tif	0.369498	0.00151402	-0.299534	-0.17578	-0.291368	0.158746	0.249937	-0.0926218	0.258265	0.102262	0.134159	-0.154074	0.144453	0.151218	0.0158413	-0.190565	0.0296649	0.189577	-0.102699	-0.221544	-0.0857115	0.223967	-0.22132	-0.252551	-0.201185	0.259851
98901_6w_G1_D.tif	0.349578	-0.0166657	-0.282973	-0.17458	-0.283204	0.1418	0.23356	-0.11517	0.253554	0.134717	0.122161	-0.164569	0.141883	0.175625	0.0125924	-0.202299	0.0297167	0.20457	-0.0979104	-0.229105	-0.0808885	0.235851	-0.207399	-0.261229	-0.190671	0.271053
98907_6w_G1_D.tif	0.329205	-0.000417453	-0.272196	-0.152258	-0.26641	0.177739	0.235223	-0.137738	0.222594	0.118871	0.129222	-0.184788	0.122434	0.178044	0.0237783	-0.220575	0.0196525	0.215652	-0.0829408	-0.247801	-0.0837814	0.246749	-0.189822	-0.275069	-0.186957	0.281592
98909_6w_G1_D.tif	0.34328	-0.0153249	-0.275612	-0.136734	-0.280228	0.187349	0.241027	-0.123425	0.23146	0.106536	0.13449	-0.17542	0.122789	0.161048	0.0273498	-0.211595	0.0157911	0.205855	-0.0799839	-0.243255	-0.0922067	0.241859	-0.187406	-0.274934	-0.20075	0.278041
98911_6w_G1_D.tif	0.378721	-0.0122414	-0.305169	-0.13618	-0.306061	0.163328	0.262832	-0.103653	0.258433	0.0914124	0.145537	-0.158973	0.141586	0.149445	0.0248699	-0.18488	0.0229837	0.189465	-0.0947271	-0.214806	-0.0977126	0.216642	-0.213805	-0.248566	-0.217487	0.249006
98912_6w_G1_D.tif	0.362171	-0.00474174	-0.290976	-0.170633	-0.285805	0.178639	0.246849	-0.0971258	0.250608	0.101345	0.134796	-0.160257	0.138514	0.153968	0.0190409	-0.195105	0.0247063	0.191485	-0.0965227	-0.22681	-0.0892173	0.225904	-0.211567	-0.260341	-0.202597	0.263672
98913_6w_G1_D.tif	0.363812	-0.0165531	-0.291805	-0.125081	-0.297168	0.17464	0.253057	-0.109436	0.246924	0.0982354	0.14091	-0.164846	0.132094	0.151572	0.0275508	-0.200499	0.0180313	0.193617	-0.0861609	-0.230404	-0.0964919	0.228417	-0.199416	-0.263574	-0.211338	0.263912
98914_6w_G1_D.tif	0.349628	-0.0198016	-0.280396	-0.139287	-0.286912	0.17789	0.243823	-0.117764	0.236517	0.100502	0.135289	-0.168168	0.127773	0.162056	0.02651	-0.205035	0.0168845	0.201762	-0.0825499	-0.237055	-0.0924083	0.240468	-0.191216	-0.27207	-0.202944	0.276502
98917_6w_G1_D.tif	0.369178	-0.00828399	-0.297503	-0.169356	-0.295379	0.148338	0.250347	-0.100728	0.257278	0.10218	0.133468	-0.152605	0.14261	0.153294	0.0159975	-0.185333	0.0271518	0.191002	-0.099487	-0.220376	-0.0870151	0.22977	-0.215089	-0.255454	-0.201557	0.267553
98921_6w_G1_D.tif	0.38131	-0.0152445	-0.302538	-0.155584	-0.300803	0.182193	0.262232	-0.0965727	0.260969	0.0893694	0.14223	-0.142964	0.141492	0.141674	0.0223	-0.178686	0.021974	0.181956	-0.0964487	-0.217985	-0.0980061	0.21575	-0.216185	-0.252303	-0.218526	0.248395
98924_6w_G1_D.tif	0.389963	-0.0100498	-0.309631	-0.167027	-0.308706	0.156276	0.265546	-0.0951226	0.271314	0.0951801	0.142	-0.142455	0.148983	0.141249	0.0183	-0.174136	0.0265569	0.17798	-0.104827	-0.203028	-0.0961551	0.209528	-0.226454	-0.237982	-0.21689	0.249588
98932_6w_G1_D.tif	0.372337	-0.0107361	-0.300124	-0.167502	-0.301077	0.134514	0.251174	-0.0975338	0.259997	0.0984164	0.133517	-0.148892	0.144649	0.151401	0.0167006	-0.18603	0.0288483	0.193256	-0.0991541	-0.220431	-0.0876223	0.228609	-0.216742	-0.248025	-0.202503	0.272954
98933_6w_G1_D.tif	0.36021	-0.00158137	-0.288339	-0.179199	-0.283891	0.171461	0.248235	-0.107588	0.24815	0.103423	0.133479	-0.159563	0.136688	0.154761	0.0186534	-0.196601	0.0248056	0.195315	-0.098137	-0.221922	-0.0878559	0.229872	-0.212277	-0.256712	-0.19972	0.268334
98941_6w_G1_D.tif	0.368439	-0.00803296	-0.296849	-0.153362	-0.289885	0.184544	0.254442	-0.102048	0.252494	0.0985948	0.139203	-0.157081	0.13909	0.154887	0.0216194	-0.190482	0.0222409	0.188014	-0.0954536	-0.22411	-0.0938886	0.219026	-0.211611	-0.261663	-0.20984	0.251712
98492_6w_G1_D.tif	0.372537	-0.00850423	-0.295282	-0.175163	-0.292422	0.180986	0.255247	-0.0978098	0.256938	0.0948816	0.138671	-0.15266	0.141838	0.149494	0.0196371	-0.185677	0.0248659	0.188706	-0.0991117	-0.216894	-0.0945384	0.216642	-0.217338	-0.249664	-0.211041	0.255662
98954_6w_G1_D.tif	0.362453	-0.00375243	-0.292429	-0.169968	-0.288555	0.162202	0.247992	-0.104273	0.251145	0.104231	0.133715	-0.159757	0.139205	0.156814	0.0181244	-0.194583	0.025437	0.192835	-0.0975415	-0.223828	-0.0875423	0.22862	-0.212189	-0.256996	-0.199815	0.268456
98968_6w_G1_D.tif	0.328826	-0.0135974	-0.262712	-0.184857	-0.267612	0.170306	0.224994	-0.124189	0.230327	0.121718	0.120114	-0.173805	0.125797	0.172066	0.0179369	-0.215562	0.0233106	0.217082	-0.0864878	-0.243835	-0.0800894	0.255342	-0.190589	-0.27437	-0.183815	0.293701
98970_6w_G1_D.tif	0.375847	-0.00915876	-0.298748	-0.168942	-0.296632	0.170224	0.258008	-0.102023	0.258715	0.095516	0.138499	-0.148718	0.141642	0.147068	0.0186412	-0.18006	0.0241336	0.186295	-0.0990343	-0.216246	-0.0938571	0.219142	-0.216884	-0.251127	-0.210331	0.258028
98975_6w_G1_D.tif	0.346067	-0.00234709	-0.27614	-0.204507	-0.271941	0.162518	0.233817	-0.108795	0.244561	0.115651	0.121184	-0.158436	0.137685	0.166028	0.0109732	-0.199216	0.0306757	0.208247	-0.0997002	-0.233714	-0.0783418	0.241216	-0.21203	-0.263939	-0.18681	0.277296
98977_6w_G1_D.tif	0.381575	-0.00857348	-0.30542	-0.154542	-0.30648	0.151054	0.262136	-0.101499	0.262232	0.0936059	0.14135	-0.148312	0.142632	0.141716	0.0212053	-0.182195	0.0234294	0.180826	-0.0984483	-0.212411	-0.0940191	0.222894	-0.217738	-0.244303	-0.212456	0.261739
98980_6w_G1_D.tif	0.369088	-0.00776051	-0.294869	-0.169945	-0.293842	0.162489	0.25217	-0.102045	0.254641	0.0983456	0.13484	-0.150738	0.139381	0.14836	0.0189368	-0.189542	0.0248365	0.190641	-0.0974452	-0.220904	-0.0900725	0.227417	-0.21336	-0.254038	-0.204304	0.26772
98995_6w_G1_D.tif	0.356859	-0.0231546	-0.279126	-0.160575	-0.290272	0.184733	0.24769	-0.115386	0.243578	0.0985555	0.136929	-0.163681	0.13005	0.153504	0.0257743	-0.19733	0.0166946	0.196361	-0.0850767	-0.228226	-0.0969695	0.23398	-0.196714	-0.2553	-0.209416	0.276519
98997_6w_G1_D.tif	0.344678	-0.0211374	-0.275862	-0.150125	-0.277366	0.191187	0.236941	-0.115197	0.240257	0.115425	0.130328	-0.170144	0.129206	0.165014	0.0222445	-0.205367	0.0197822	0.205232	-0.0852586	-0.240459	-0.0909662	0.235858	-0.192407	-0.277979	-0.201577	0.267691
99013_6w_G1_D.tif	0.336363	-0.0159801	-0.272524	-0.143291	-0.272075	0.194721	0.233372	-0.117317	0.231757	0.115067	0.130981	-0.181467	0.125766	0.170632	0.024326	-0.213973	0.018134	0.207755	-0.0819607	-0.246393	-0.0888451	0.241649	-0.187591	-0.283109	-0.197703	0.271704
99020_6w_G1_D.tif	0.346199	-0.0130829	-0.27386	-0.178685	-0.279258	0.173142	0.241433	-0.126989	0.239698	0.113957	0.130591	-0.17037	0.13013	0.164266	0.0205878	-0.202386	0.0209085	0.204847	-0.0898792	-0.228388	-0.0881945	0.242345	-0.20007	-0.256233	-0.198287	0.277577
99021_6w_G1_D.tif	0.341076	-0.0145041	-0.277981	-0.155888	-0.282428	0.148011	0.233441	-0.118242	0.236133	0.112066	0.126084	-0.169925	0.12993	0.168816	0.0200631	-0.209417	0.0237084	0.212138	-0.0860915	-0.241525	-0.0826755	0.249538	-0.192865	-0.272295	-0.188394	0.291227
99025_6w_G1_D.tif	0.375337	-0.0131986	-0.29654	-0.166008	-0.295288	0.182055	0.257989	-0.102055	0.258578	0.0968079	0.139471	-0.149268	0.140587	0.147159	0.0208303	-0.183556	0.0220988	0.18472	-0.0974097	-0.216135	-0.0966851	0.216837	-0.21487	-0.25138	-0.214097	0.254022
99029_6w_G1_D.tif	0.359628	-0.0191847	-0.287573	-0.146832	-0.291201	0.173631	0.248254	-0.115092	0.249343	0.109408	0.136038	-0.165004	0.135212	0.160439	0.0228029	-0.19643	0.0209697	0.197984	-0.0899405	-0.226299	-0.0943211	0.226455	-0.201649	-0.261689	-0.207564	0.262615
99044_6w_G1_D.tif	0.347918	-0.0134957	-0.282705	-0.153754	-0.287294	0.161117	0.241475	-0.11413	0.237385	0.0996483	0.13445	-0.172969	0.131648	0.165536	0.0247811	-0.207615	0.0228137	0.209105	-0.0865095	-0.232582	-0.0874949	0.243972	-0.197438	-0.26164	-0.199028	0.276806
99045_6w_G1_D2.tif	0.370559	-0.0164667	-0.298591	-0.13859	-0.29811	0.172215	0.255954	-0.106115	0.255446	0.100869	0.140967	-0.159894	0.139291	0.153789	0.02316	-0.187511	0.0229854	0.19372	-0.0932047	-0.221771	-0.095176	0.221568	-0.209202	-0.259583	-0.214078	0.247768
99046_6w_G1_D.tif	0.361848	-0.00747031	-0.291558	-0.167965	-0.287689	0.170318	0.247012	-0.100703	0.250117	0.101043	0.133643	-0.157034	0.138367	0.155641	0.0194943	-0.196249	0.0252525	0.195012	-0.0961609	-0.22548	-0.0882581	0.229294	-0.210322	-0.261231	-0.201745	0.264823
99051_6w_G1_D.tif	0.343203	-0.00797777	-0.277631	-0.191342	-0.274336	0.155606	0.233024	-0.113668	0.241853	0.115579	0.122461	-0.163094	0.136974	0.173065	0.0128221	-0.20016	0.0299348	0.212932	-0.0964154	-0.234419	-0.078557	0.244118	-0.206473	-0.267584	-0.186858	0.276945
99060_6w_G1_D.tif	0.359131	-0.00109054	-0.292933	-0.170886	-0.28241	0.169638	0.244164	-0.101425	0.252397	0.112944	0.130925	-0.160098	0.142219	0.164659	0.016643	-0.20069	0.0289808	0.196787	-0.100081	-0.227991	-0.0857203	0.221249	-0.215475	-0.260413	-0.197842	0.257317
99062_6w_G1_D.tif	0.314012	-0.014701	-0.253691	-0.173848	-0.25372	0.20397	0.220082	-0.130429	0.217417	0.122419	0.122695	-0.187446	0.120417	0.183824	0.0238348	-0.228444	0.0195523	0.223324	-0.0781952	-0.257203	-0.0834477	0.254699	-0.181639	-0.282575	-0.187317	0.286409
99063_6w_G1_D.tif	0.359478	-0.000837489	-0.283851	-0.200813	-0.280328	0.172998	0.24408	-0.0999704	0.250112	0.101808	0.128944	-0.152786	0.139137	0.152647	0.0147895	-0.193852	0.0288089	0.198931	-0.101371	-0.22417	-0.0851975	0.230497	-0.21739	-0.254905	-0.197213	0.270451
99084_6w_G1_D.tif	0.359648	-0.0101722	-0.290106	-0.182148	-0.28892	0.152954	0.242261	-0.100222	0.254773	0.109194	0.130652	-0.160594	0.144066	0.163707	0.0157808	-0.194483	0.030454	0.200251	-0.0996833	-0.222851	-0.083859	0.23304	-0.215657	-0.251358	-0.19941	0.262681
99087_6w_G1_D.tif	0.363822	-0.0068698	-0.28646	-0.202374	-0.29175	0.142579	0.247318	-0.106486	0.255669	0.102848	0.130955	-0.155088	0.143273	0.154839	0.0158506	-0.192114	0.0307558	0.20228	-0.102742	-0.212824	-0.0852138	0.235284	-0.221122	-0.235682	-0.200356	0.273607
99089_6w_G1_D.tif	0.357576	-0.0206379	-0.284148	-0.153649	-0.290209	0.181142	0.247338	-0.11093	0.245267	0.100102	0.136552	-0.162427	0.132968	0.156881	0.025208	-0.199709	0.0197152	0.198225	-0.0871772	-0.229412	-0.0945673	0.23204	-0.199733	-0.259154	-0.208789	0.267527
99092_6w_G1_D.tif	0.382924	-0.00964075	-0.303287	-0.168408	-0.30461	0.163517	0.2637	-0.100619	0.263134	0.0905717	0.142802	-0.148101	0.14384	0.142065	0.021183	-0.179302	0.0239431	0.182069	-0.100439	-0.206674	-0.0960035	0.218506	-0.221003	-0.238714	-0.216184	0.254729
99097_6w_G1_D.tif	0.310036	-0.0238328	-0.241887	-0.191234	-0.250264	0.199995	0.213711	-0.137858	0.218652	0.130704	0.114324	-0.183178	0.117239	0.183875	0.0173457	-0.220526	0.0169138	0.224611	-0.0788613	-0.255229	-0.0822327	0.262468	-0.174489	-0.292152	-0.180487	0.302355
99109_6w_G1_D.tif	0.362101	-0.0170999	-0.293535	-0.145794	-0.292425	0.167978	0.245973	-0.0987241	0.252687	0.105714	0.134063	-0.157827	0.138859	0.157406	0.0208698	-0.196906	0.0249927	0.196731	-0.0927516	-0.230729	-0.0894596	0.229072	-0.206092	-0.267686	-0.205282	0.257865
99113_6w_G1_D.tif	0.346022	-0.01513	-0.273146	-0.186997	-0.275963	0.175297	0.235413	-0.115877	0.244056	0.117561	0.125281	-0.16454	0.134295	0.167079	0.0159492	-0.200485	0.0245484	0.205759	-0.0932565	-0.231711	-0.0864514	0.236593	-0.202081	-0.26439	-0.194668	0.27684
99141_6w_G1_D.tif	0.342028	-0.0078647	-0.276342	-0.197408	-0.273633	0.15271	0.229397	-0.108173	0.242906	0.116115	0.119933	-0.161215	0.13833	0.172688	0.0117581	-0.202395	0.03192	0.214064	-0.0971931	-0.236662	-0.0764404	0.245989	-0.207877	-0.267178	-0.184788	0.279331
99155_6w_G1_D.tif	0.376339	-0.0116978	-0.302543	-0.161343	-0.301786	0.15213	0.255914	-0.0962956	0.260399	0.0936873	0.137179	-0.146339	0.144152	0.149355	0.0188046	-0.182929	0.026196	0.1873	-0.0988218	-0.217907	-0.0910068	0.223865	-0.216779	-0.251848	-0.208047	0.26202
99156_6w_G1_D.tif	0.356576	-0.0105997	-0.282697	-0.17957	-0.281355	0.184471	0.242976	-0.102234	0.246947	0.102771	0.131756	-0.159307	0.135642	0.156016	0.0188175	-0.196275	0.0234598	0.196231	-0.0942713	-0.228872	-0.0894794	0.230774	-0.206955	-0.262828	-0.201416	0.269422
99167_6w_G1_D.tif	0.343371	-0.00187725	-0.283441	-0.137944	-0.275552	0.179148	0.240886	-0.122022	0.233773	0.1142	0.133096	-0.178437	0.128039	0.169357	0.0229645	-0.211055	0.0205505	0.205267	-0.0866339	-0.242937	-0.0867505	0.236463	-0.195653	-0.277997	-0.194648	0.267834
99171_6w_G1_D.tif	0.343145	-0.011775	-0.271752	-0.175916	-0.269046	0.194721	0.236801	-0.118182	0.236785	0.113994	0.126901	-0.165143	0.128227	0.165596	0.0192377	-0.205838	0.0186275	0.200698	-0.0895192	-0.237392	-0.08878	0.236928	-0.196089	-0.275905	-0.194538	0.278214
99177_6w_G1_D.tif	0.351299	-0.00691891	-0.282229	-0.17449	-0.279366	0.176049	0.239989	-0.104919	0.241854	0.103563	0.129649	-0.161253	0.132564	0.156626	0.0187398	-0.200416	0.0237402	0.200233	-0.0922669	-0.234778	-0.0852477	0.239446	-0.203379	-0.26917	-0.195345	0.276028
99179_6w_G1_D.tif	0.331374	-0.00444658	-0.267736	-0.183233	-0.259695	0.190236	0.226537	-0.114541	0.230042	0.118872	0.120755	-0.169506	0.125426	0.167358	0.0158845	-0.211885	0.0238705	0.212781	-0.088927	-0.250141	-0.079442	0.248526	-0.194406	-0.286546	-0.183683	0.282526
99181_6w_G1_D.tif	0.31726	-0.00589242	-0.268301	-0.156242	-0.259252	0.176191	0.216186	-0.115944	0.224543	0.130232	0.118656	-0.183868	0.127415	0.186921	0.0204561	-0.235589	0.0283834	0.226738	-0.0836184	-0.262466	-0.0745977	0.251943	-0.188418	-0.289531	-0.178713	0.277507
99198_6w_G1_D.tif	0.34195	-0.0162071	-0.275827	-0.165522	-0.278269	0.171508	0.234778	-0.116224	0.237335	0.111449	0.127749	-0.16903	0.131054	0.169488	0.0207213	-0.207855	0.0232221	0.210064	-0.0875576	-0.237866	-0.085488	0.243356	-0.195435	-0.271014	-0.194232	0.277855
99200_6w_G1_D.tif	0.358406	-0.0164227	-0.285416	-0.158274	-0.288279	0.185263	0.247744	-0.105204	0.243772	0.0942759	0.136994	-0.160237	0.132316	0.152802	0.0253306	-0.200145	0.0202813	0.197595	-0.088338	-0.229136	-0.0932638	0.233663	-0.201496	-0.261441	-0.208051	0.267259
99204_6w_G1_D.tif	0.356518	-0.0289399	-0.282556	-0.148845	-0.288749	0.190697	0.245231	-0.10664	0.246317	0.100352	0.135339	-0.157708	0.133598	0.158703	0.0250672	-0.197358	0.0190697	0.197928	-0.0854989	-0.234581	-0.0956667	0.23138	-0.197127	-0.267534	-0.211543	0.262547
99206_6w_G1_D.tif	0.385002	-0.012406	-0.308726	-0.140318	-0.30919	0.167523	0.265913	-0.0970486	0.263994	0.0901326	0.14653	-0.151611	0.144468	0.14439	0.0254331	-0.186309	0.0236136	0.183621	-0.0970878	-0.211247	-0.0995978	0.21033	-0.218817	-0.241015	-0.221535	0.243959
99207_6w_G1_D2.tif	0.381615	-0.0152691	-0.303066	-0.151562	-0.304379	0.177684	0.263071	-0.0960176	0.260775	0.0874273	0.144784	-0.149743	0.14231	0.143986	0.0247733	-0.18432	0.0219281	0.183066	-0.0960447	-0.212573	-0.0998988	0.213105	-0.215802	-0.245963	-0.220066	0.250181
99209_6w_G1_D.tif	0.381098	-0.0110082	-0.300805	-0.16765	-0.298868	0.182188	0.261147	-0.0939439	0.26092	0.088469	0.141242	-0.143704	0.141737	0.139736	0.0212402	-0.180738	0.0228901	0.181696	-0.0988285	-0.214144	-0.0972778	0.215	-0.218323	-0.249213	-0.216171	0.253312
99211_6w_G1_D.tif	0.341721	-0.0201109	-0.275679	-0.134693	-0.281807	0.17784	0.235734	-0.116275	0.235257	0.112192	0.130875	-0.175244	0.126437	0.165814	0.0247527	-0.212655	0.0187299	0.207975	-0.0814552	-0.244661	-0.0899646	0.24096	-0.187124	-0.280304	-0.197475	0.279162
99212_6w_G1_D.tif	0.372768	-0.00617574	-0.296636	-0.178185	-0.292048	0.175483	0.253797	-0.0943549	0.257589	0.0948803	0.135893	-0.146275	0.141402	0.144131	0.0187079	-0.18776	0.0268954	0.190556	-0.100482	-0.218378	-0.090745	0.222654	-0.218837	-0.252566	-0.208305	0.255991
99227_6w_G1_D.tif	0.371033	-0.00723713	-0.29384	-0.18668	-0.291286	0.171314	0.250783	-0.091603	0.256832	0.0928682	0.133603	-0.144808	0.141681	0.144671	0.0172115	-0.186852	0.0273222	0.190643	-0.100973	-0.218552	-0.0887453	0.227493	-0.218242	-0.254054	-0.205379	0.262796
99228_6w_G1_D.tif	0.343064	-0.0165532	-0.272048	-0.180343	-0.275024	0.182404	0.234801	-0.115111	0.239214	0.111953	0.125943	-0.162768	0.130939	0.165062	0.0193283	-0.204878	0.0222285	0.205232	-0.0884376	-0.239065	-0.0859564	0.243596	-0.198093	-0.267176	-0.195959	0.277647
99229_6w_G1_D.tif	0.374976	-0.0121643	-0.300615	-0.148439	-0.301475	0.165247	0.256674	-0.0963667	0.257188	0.0927274	0.139865	-0.150932	0.139943	0.144928	0.022764	-0.189525	0.0229641	0.186619	-0.094697	-0.221349	-0.0945894	0.221575	-0.211901	-0.25426	-0.211095	0.261939
99236_6w_G1_D.tif	0.368732	-0.0110929	-0.297364	-0.15722	-0.2933	0.173162	0.250793	-0.0936178	0.255145	0.0977875	0.136944	-0.154945	0.139961	0.149155	0.0200584	-0.189545	0.0255783	0.192573	-0.0962894	-0.223982	-0.0904952	0.225599	-0.211914	-0.262827	-0.207851	0.254953
99237_6w_G1_D.tif	0.360843	9.65454e-05	-0.285573	-0.197943	-0.27979	0.177476	0.246458	-0.100209	0.248474	0.0974664	0.129391	-0.148118	0.137386	0.149446	0.0156044	-0.192406	0.027316	0.196677	-0.100315	-0.226003	-0.0852078	0.232862	-0.216609	-0.258462	-0.197977	0.269116
99243_6w_G1_D.tif	0.35552	-0.00339259	-0.282439	-0.198677	-0.277272	0.169166	0.241185	-0.106325	0.250224	0.112084	0.127095	-0.158647	0.140334	0.162984	0.0111	-0.189514	0.0286791	0.19926	-0.101968	-0.225319	-0.083371	0.231232	-0.215045	-0.261129	-0.194042	0.268277
99244_6w_G1_D.tif	0.325946	-0.0242424	-0.249636	-0.188662	-0.259134	0.219047	0.228215	-0.125749	0.220355	0.10461	0.126936	-0.176235	0.117872	0.168113	0.0254763	-0.215204	0.0123911	0.211544	-0.0774274	-0.24689	-0.0925596	0.252806	-0.18126	-0.274999	-0.197175	0.295863
99249_6w_G1_D.tif	0.367047	0.00151231	-0.290961	-0.196568	-0.285654	0.170819	0.249758	-0.096229	0.254705	0.0976845	0.132874	-0.151333	0.142712	0.151936	0.0148665	-0.188293	0.028025	0.189535	-0.103741	-0.218844	-0.0870429	0.224538	-0.221843	-0.250558	-0.200746	0.265801
99255_6w_G1_D.tif	0.383667	-0.0053182	-0.30523	-0.176263	-0.30352	0.153701	0.26158	-0.095628	0.265421	0.0913498	0.138744	-0.1412	0.146713	0.142469	0.0176329	-0.1785	0.0271232	0.1815	-0.103771	-0.209317	-0.0922999	0.218218	-0.225105	-0.240129	-0.210955	0.259118
99271_6w_G1_D.tif	0.389023	-0.00863083	-0.310692	-0.159881	-0.307112	0.164945	0.265346	-0.0887534	0.267161	0.0853075	0.142331	-0.137408	0.146782	0.138488	0.0200019	-0.175661	0.025462	0.177561	-0.101909	-0.211554	-0.0960655	0.211407	-0.223887	-0.246485	-0.216442	0.250666
99274_6w_G1_D.tif	0.372844	-0.00904748	-0.3028	-0.146001	-0.300348	0.149041	0.255221	-0.104574	0.258909	0.104465	0.137847	-0.156495	0.142549	0.153757	0.0198674	-0.189629	0.0262693	0.192373	-0.0977947	-0.218899	-0.091184	0.220973	-0.214396	-0.253873	-0.206984	0.25791
99295_6w_G1_D.tif	0.330608	-0.0131894	-0.26381	-0.168957	-0.260854	0.205402	0.231933	-0.127923	0.226583	0.117544	0.127001	-0.17638	0.122433	0.172744	0.0225984	-0.214992	0.0163699	0.209151	-0.0829751	-0.246635	-0.0881349	0.244978	-0.187947	-0.280544	-0.193806	0.278801
99296_6w_G1_D.tif	0.349397	-0.0115491	-0.281132	-0.14337	-0.280994	0.182975	0.244438	-0.124919	0.239204	0.114175	0.133553	-0.169358	0.127916	0.162303	0.0244387	-0.208335	0.0179769	0.200696	-0.0859385	-0.236798	-0.0919315	0.233564	-0.195522	-0.268793	-0.201405	0.269409
99302_6w_G1_D.tif	0.378546	-0.00217266	-0.302468	-0.181142	-0.297313	0.157498	0.257217	-0.0947912	0.263126	0.0960695	0.135604	-0.142373	0.14647	0.146801	0.0161087	-0.182851	0.0281205	0.18261	-0.104657	-0.21351	-0.0891152	0.220589	-0.22507	-0.245346	-0.206568	0.258619
99305_6w_G1_D.tif	0.374721	-0.00733566	-0.295318	-0.192912	-0.293706	0.166623	0.253079	-0.0927123	0.260836	0.0935769	0.133582	-0.141876	0.144734	0.144969	0.0154254	-0.181768	0.0292346	0.191094	-0.10337	-0.215568	-0.089438	0.222936	-0.222881	-0.247092	-0.206899	0.260065
99307_6w_G1_D.tif	0.360006	-0.000616743	-0.29253	-0.173377	-0.284959	0.165366	0.246895	-0.102736	0.248273	0.100409	0.132568	-0.15701	0.138813	0.157424	0.0178314	-0.195755	0.0277948	0.199485	-0.0975827	-0.22832	-0.0856459	0.229425	-0.213447	-0.259741	-0.198016	0.265447
99314_6w_G1_D.tif	0.371437	-0.0119229	-0.295526	-0.167168	-0.294907	0.172537	0.254386	-0.103451	0.25853	0.102946	0.137794	-0.155104	0.142151	0.152953	0.0197897	-0.187549	0.0244686	0.188741	-0.0979525	-0.217342	-0.094042	0.21831	-0.215377	-0.248338	-0.210752	0.255387
99316_6w_G1_D.tif	0.359418	-0.0186505	-0.28287	-0.171905	-0.28773	0.182452	0.247645	-0.10943	0.246611	0.0978078	0.134946	-0.157742	0.134168	0.154917	0.021619	-0.190991	0.0199611	0.194481	-0.0903803	-0.226588	-0.0930385	0.233644	-0.203364	-0.25839	-0.206986	0.270393
99321_6w_G1_D.tif	0.343066	-0.0189195	-0.274576	-0.15125	-0.280015	0.186249	0.239336	-0.117989	0.231705	0.1008	0.133013	-0.170111	0.125104	0.162591	0.0265477	-0.210005	0.0175977	0.20748	-0.081638	-0.239562	-0.0906786	0.24481	-0.189145	-0.273559	-0.200316	0.279466
99330_6w_G1_D.tif	0.372087	-0.00690187	-0.298537	-0.165502	-0.293334	0.172534	0.253993	-0.0971187	0.257109	0.0980513	0.136105	-0.147538	0.141086	0.147414	0.0197698	-0.190803	0.0258921	0.189683	-0.0986286	-0.221597	-0.0913275	0.220825	-0.216406	-0.255041	-0.207809	0.255993
99334_6w_G1_D.tif	0.385505	-0.0117582	-0.305426	-0.157704	-0.305781	0.172667	0.265939	-0.0976602	0.26282	0.0862372	0.144585	-0.144305	0.141936	0.136572	0.0235292	-0.180239	0.0229727	0.183249	-0.0985569	-0.208222	-0.0988304	0.214757	-0.218985	-0.243946	-0.219707	0.250352
99338_6w_G1_D.tif	0.346887	-0.0121086	-0.275614	-0.18104	-0.272794	0.187748	0.235211	-0.107326	0.242664	0.112874	0.126258	-0.162952	0.132863	0.162677	0.0165564	-0.201048	0.0238849	0.203381	-0.092757	-0.236079	-0.086841	0.234361	-0.201237	-0.273838	-0.195081	0.27335
99346_6w_G1_D.tif	0.367949	-0.00393663	-0.293801	-0.181465	-0.288015	0.165073	0.249577	-0.100133	0.255603	0.102342	0.130311	-0.145249	0.140864	0.149901	0.0147314	-0.1876	0.0274387	0.192098	-0.101019	-0.223408	-0.0872958	0.224824	-0.216593	-0.259174	-0.19975	0.266728
99349_6w_G1_D.tif	0.330496	-0.00905232	-0.261805	-0.190802	-0.254269	0.207114	0.225572	-0.115219	0.23118	0.121239	0.119565	-0.167023	0.125805	0.170155	0.0162049	-0.213252	0.0213324	0.209176	-0.0887606	-0.250467	-0.0834209	0.243523	-0.194235	-0.285461	-0.187665	0.280069
99351_6w_G1_D.tif	0.370214	-0.0115075	-0.28847	-0.182033	-0.289428	0.190485	0.257314	-0.107698	0.252471	0.0929705	0.140952	-0.157409	0.13766	0.149403	0.0214349	-0.184176	0.0206286	0.188858	-0.0975805	-0.210515	-0.0977835	0.220262	-0.213558	-0.247748	-0.213854	0.259108
99352_6w_G1_D.tif	0.321221	-0.00745975	-0.262157	-0.176752	-0.25561	0.18314	0.221176	-0.12783	0.224802	0.129835	0.116688	-0.17604	0.124559	0.183499	0.0156479	-0.219473	0.0224472	0.217526	-0.0859174	-0.255323	-0.0783697	0.250021	-0.187437	-0.29116	-0.177051	0.290015
99354_6w_G1_D.tif	0.346563	-0.00646004	-0.282438	-0.17093	-0.276608	0.168449	0.236869	-0.111851	0.242803	0.116709	0.127114	-0.166054	0.135063	0.167697	0.0170872	-0.204473	0.0263903	0.20496	-0.0935671	-0.236719	-0.0822198	0.239001	-0.204546	-0.269051	-0.192511	0.268722
99358_6w_G1_D.tif	0.368829	-0.00159182	-0.301559	-0.154085	-0.295508	0.144541	0.252932	-0.104981	0.254827	0.102536	0.135761	-0.157122	0.141276	0.155131	0.0184374	-0.191882	0.0264752	0.19148	-0.0989114	-0.220438	-0.0872976	0.22755	-0.214451	-0.257214	-0.20081	0.266078
99363_6w_G1_D.tif	0.367564	-0.00652988	-0.298421	-0.156825	-0.295629	0.152012	0.251668	-0.103905	0.254567	0.102267	0.136255	-0.158716	0.14068	0.1543	0.0196412	-0.192898	0.0265702	0.19543	-0.0973413	-0.220636	-0.0888516	0.227069	-0.213106	-0.254589	-0.203596	0.263021
99364_6w_G1_D.tif	0.325705	-0.00923554	-0.263499	-0.170487	-0.26354	0.186849	0.223947	-0.117121	0.223251	0.114069	0.123301	-0.179702	0.121884	0.171369	0.021105	-0.220636	0.0196869	0.213396	-0.0821013	-0.252436	-0.0818801	0.253215	-0.184941	-0.285635	-0.182916	0.296354
99371_6w_G1_D.tif	0.333688	-0.00727149	-0.271178	-0.179223	-0.265668	0.179064	0.228347	-0.116576	0.234311	0.121882	0.123802	-0.175872	0.130496	0.17482	0.0167614	-0.211988	0.0257974	0.214105	-0.0914539	-0.240475	-0.0806805	0.243997	-0.197344	-0.278253	-0.186878	0.275791
99375_6w_G1_D.tif	0.345334	-0.0217733	-0.27369	-0.151032	-0.278415	0.192363	0.24271	-0.129022	0.233974	0.106661	0.132231	-0.163709	0.125274	0.165342	0.0253352	-0.203845	0.014948	0.203399	-0.0815778	-0.240665	-0.0940432	0.238777	-0.189442	-0.272724	-0.202638	0.276228
99376_6w_G1_D.tif	0.357841	-0.00705892	-0.293156	-0.146837	-0.282817	0.181087	0.245988	-0.105516	0.248643	0.11106	0.133612	-0.161315	0.138892	0.166946	0.0206952	-0.203272	0.0246265	0.195892	-0.0941797	-0.234083	-0.0893959	0.221378	-0.208104	-0.269671	-0.202646	0.251389
99394_6w_G1_D.tif	0.375954	-0.0128306	-0.300145	-0.145253	-0.300354	0.176201	0.261153	-0.105034	0.254649	0.08947	0.142291	-0.148123	0.137733	0.144933	0.0246543	-0.185854	0.0204729	0.186445	-0.0924719	-0.223216	-0.0976005	0.219957	-0.211028	-0.253023	-0.215306	0.256328
99401_6w_G1_D.tif	0.38553	-0.0119405	-0.309142	-0.153521	-0.309526	0.15459	0.263023	-0.0893291	0.264504	0.0837734	0.143141	-0.144943	0.14538	0.140181	0.0217797	-0.179607	0.0257778	0.184328	-0.0996462	-0.209959	-0.095295	0.217897	-0.21987	-0.246803	-0.215657	0.255334
99406_6w_G1_D.tif	0.353236	-0.0148289	-0.285382	-0.164368	-0.285657	0.162011	0.240836	-0.110116	0.246446	0.109391	0.12921	-0.159646	0.136262	0.163441	0.0184749	-0.198074	0.0255377	0.203719	-0.0918872	-0.233893	-0.0858292	0.23722	-0.203614	-0.265337	-0.197633	0.27048
99407_6w_G1_D.tif	0.383072	-0.0101556	-0.304401	-0.158747	-0.300409	0.181823	0.262668	-0.0925814	0.262378	0.0894156	0.142456	-0.143974	0.14274	0.140427	0.0217711	-0.181177	0.0227703	0.179375	-0.0991277	-0.214212	-0.0976927	0.212153	-0.218986	-0.251167	-0.217239	0.24882
99409_6w_G1_D.tif	0.374195	-0.0140812	-0.291692	-0.18124	-0.291766	0.19187	0.257513	-0.100585	0.256691	0.0913167	0.139287	-0.147191	0.139607	0.144589	0.0201416	-0.179355	0.021494	0.184577	-0.0969919	-0.217536	-0.0968595	0.220556	-0.215897	-0.248274	-0.215722	0.255353
99412_6w_G1_D.tif	0.377083	-0.0157673	-0.291157	-0.178738	-0.298431	0.18643	0.260187	-0.103398	0.258991	0.0922188	0.142652	-0.153269	0.138845	0.139967	0.0231404	-0.182729	0.0195725	0.181799	-0.0960955	-0.209627	-0.100367	0.21912	-0.215118	-0.236483	-0.219301	0.260475
99422_6w_G1_D.tif	0.362543	-0.00445379	-0.290253	-0.150003	-0.283758	0.196866	0.254012	-0.109551	0.242706	0.0955313	0.139616	-0.159851	0.129365	0.147172	0.0246497	-0.195804	0.0171338	0.189209	-0.089708	-0.231589	-0.09464	0.227411	-0.203845	-0.26733	-0.207822	0.262393
99424_6w_G1_D.tif	0.35396	-0.00871567	-0.285321	-0.148848	-0.281892	0.187778	0.247632	-0.115483	0.239496	0.102422	0.136427	-0.166742	0.130119	0.159858	0.0241507	-0.201429	0.0184171	0.196625	-0.0878608	-0.234517	-0.0922612	0.231532	-0.199509	-0.26905	-0.203358	0.266568
99427_6w_G1_D.tif	0.385423	-0.00553641	-0.307738	-0.164033	-0.3011	0.172671	0.262328	-0.0905211	0.267211	0.0958749	0.1413	-0.145627	0.1463	0.140899	0.0180601	-0.177111	0.0255086	0.176885	-0.103792	-0.210354	-0.0948098	0.210476	-0.224043	-0.24974	-0.214648	0.246117
99429_6w_G1_D.tif	0.384523	-0.00244023	-0.305609	-0.174251	-0.297043	0.178301	0.261292	-0.0895665	0.266362	0.0950052	0.13846	-0.138622	0.145707	0.1382	0.0167207	-0.177918	0.0264567	0.177644	-0.104426	-0.215199	-0.0936776	0.210315	-0.226058	-0.249289	-0.212707	0.247819
99436_6w_G1_D.tif	0.396719	-0.0132103	-0.312828	-0.151719	-0.308232	0.184647	0.274677	-0.101048	0.272301	0.0924462	0.147779	-0.136628	0.146733	0.137821	0.0224825	-0.169889	0.0205526	0.168863	-0.102597	-0.201428	-0.104117	0.199333	-0.225595	-0.241854	-0.227876	0.232667
99437_6w_G1_D.tif	0.369729	-0.020853	-0.297265	-0.111217	-0.305816	0.156722	0.256094	-0.106596	0.252112	0.0971322	0.141863	-0.16003	0.135957	0.153346	0.0274613	-0.198445	0.0184498	0.189317	-0.0876217	-0.22682	-0.0964274	0.228475	-0.201656	-0.264205	-0.212881	0.263174
99441_6w_G1_D.tif	0.377894	-0.00765609	-0.301274	-0.166499	-0.299283	0.166176	0.258963	-0.0992127	0.260749	0.0958255	0.139903	-0.150729	0.142943	0.14597	0.0193165	-0.181595	0.0241003	0.182334	-0.100047	-0.213188	-0.0934196	0.219909	-0.218572	-0.248094	-0.211273	0.25676
99443_6w_G1_D.tif	0.357677	-0.00861003	-0.289083	-0.195815	-0.285427	0.132548	0.236292	-0.0986948	0.256925	0.115836	0.122039	-0.151909	0.146591	0.165962	0.00901662	-0.19164	0.0350664	0.204562	-0.103706	-0.226843	-0.0769639	0.239358	-0.218641	-0.256464	-0.189787	0.27171
99444_6w_G1_D.tif	0.339455	-0.0144044	-0.274379	-0.146651	-0.277868	0.174394	0.235438	-0.12453	0.234113	0.11796	0.129053	-0.175572	0.125142	0.165516	0.0231252	-0.212766	0.0190823	0.208312	-0.0830779	-0.243356	-0.0868256	0.245981	-0.18913	-0.275579	-0.194128	0.280694
99446_6w_G1_D.tif	0.362935	-0.0102959	-0.293529	-0.16918	-0.291327	0.147527	0.246138	-0.107565	0.255834	0.113471	0.130741	-0.157347	0.142709	0.16294	0.0162632	-0.194436	0.0280302	0.196277	-0.099437	-0.220811	-0.0857698	0.229361	-0.213448	-0.255012	-0.19914	0.265072
99450_6w_G1_D.tif	0.376042	-0.0125865	-0.299717	-0.160249	-0.30141	0.161234	0.258508	-0.101921	0.257006	0.0895837	0.139619	-0.148382	0.14086	0.14747	0.0212034	-0.182831	0.0232712	0.188032	-0.0964473	-0.215851	-0.0947641	0.221737	-0.21358	-0.250865	-0.210592	0.26463
99451_6w_G1_D.tif	0.338441	-0.0133023	-0.271219	-0.165723	-0.267226	0.200516	0.233895	-0.115209	0.232885	0.112393	0.128309	-0.170927	0.12663	0.16757	0.0216927	-0.210421	0.0186322	0.204565	-0.0859256	-0.243366	-0.0878442	0.24102	-0.192383	-0.281118	-0.195887	0.274002
99452_6w_G1_D.tif	0.382116	-0.00529384	-0.307705	-0.161806	-0.304379	0.149911	0.258471	-0.0899025	0.265618	0.0949543	0.1377	-0.142518	0.146727	0.142776	0.0182155	-0.184073	0.0274141	0.180013	-0.101689	-0.217382	-0.090957	0.218416	-0.222646	-0.245699	-0.208886	0.260603
99455_6w_G1_D.tif	0.368162	-0.00142902	-0.300493	-0.163506	-0.293162	0.14532	0.252564	-0.108491	0.256299	0.107692	0.13443	-0.15671	0.142373	0.156026	0.0163771	-0.189201	0.0288459	0.196742	-0.101155	-0.218813	-0.0860856	0.226763	-0.21753	-0.254076	-0.200625	0.259685
99459_6w_G1_D.tif	0.388945	-0.018949	-0.305211	-0.152607	-0.308031	0.185691	0.267298	-0.0895713	0.264608	0.0812084	0.146852	-0.141425	0.141157	0.130972	0.0252068	-0.176071	0.0197409	0.175915	-0.0959894	-0.210527	-0.102494	0.213276	-0.216725	-0.246807	-0.225357	0.248893
99460_6w_G1_D.tif	0.38618	-0.00210244	-0.307264	-0.17634	-0.305225	0.158965	0.263599	-0.0885873	0.265221	0.0830113	0.141888	-0.142138	0.147005	0.138709	0.0195681	-0.179284	0.0263142	0.176885	-0.103804	-0.207747	-0.0933687	0.217678	-0.22675	-0.237593	-0.213364	0.258544
99465_6w_G1_D.tif	0.350287	-0.0230948	-0.275008	-0.149479	-0.277972	0.207253	0.245875	-0.121327	0.235404	0.0999963	0.13561	-0.162483	0.123748	0.156287	0.0260859	-0.197078	0.0131424	0.199397	-0.0812728	-0.240195	-0.0977281	0.234936	-0.189914	-0.276092	-0.208257	0.27188
99472_6w_G1_D.tif	0.36977	-0.00984765	-0.29218	-0.187751	-0.290367	0.166358	0.2487	-0.0961281	0.259149	0.102572	0.130911	-0.145941	0.143214	0.150634	0.0145579	-0.18533	0.02712	0.188565	-0.102169	-0.218005	-0.0881341	0.225899	-0.21756	-0.25545	-0.203011	0.264425
99477_6w_G1_D.tif	0.366463	-0.0185128	-0.294957	-0.156527	-0.296135	0.157021	0.250923	-0.110076	0.255886	0.106731	0.134977	-0.154893	0.14178	0.162014	0.0195216	-0.188592	0.0246765	0.193996	-0.0954666	-0.22099	-0.090497	0.228051	-0.210206	-0.256084	-0.206966	0.25786
99486_6w_G1_D.tif	0.370054	-0.000908963	-0.290533	-0.191133	-0.285557	0.182029	0.25503	-0.103898	0.254202	0.0978811	0.135319	-0.150011	0.139323	0.147419	0.0163248	-0.184493	0.0242615	0.187366	-0.10213	-0.21627	-0.0917861	0.220555	-0.219207	-0.251412	-0.2053	0.262877
99489_6w_G1_D.tif	0.370008	-0.0150331	-0.293137	-0.151038	-0.292291	0.194338	0.256437	-0.102045	0.251115	0.0926182	0.141578	-0.154928	0.134566	0.145391	0.0256648	-0.19247	0.0187413	0.18797	-0.0915098	-0.222083	-0.0984254	0.221457	-0.207011	-0.259498	-0.215736	0.255321
99490_6w_G1_D.tif	0.361276	-0.0117984	-0.290904	-0.172482	-0.287461	0.169046	0.244785	-0.0989682	0.25225	0.10307	0.131638	-0.154383	0.140621	0.158383	0.0173713	-0.192018	0.027343	0.197762	-0.0966555	-0.227769	-0.0869227	0.230142	-0.211399	-0.261906	-0.201943	0.260922
99492_6w_G1_D.tif	0.362355	0.00400144	-0.287067	-0.194524	-0.278137	0.186938	0.246883	-0.0961469	0.250676	0.101683	0.132062	-0.154744	0.138108	0.148383	0.0152769	-0.192493	0.0264834	0.191082	-0.101833	-0.224975	-0.0871098	0.225266	-0.21818	-0.259006	-0.199518	0.264536
99498_6w_G1_D.tif	0.347661	-0.00917002	-0.27843	-0.18072	-0.274714	0.180368	0.237079	-0.109259	0.242638	0.112116	0.126975	-0.162303	0.13376	0.163069	0.0169844	-0.201461	0.0249972	0.203636	-0.093419	-0.235405	-0.0847167	0.237508	-0.203977	-0.269393	-0.194838	0.271015
99499_6w_G1_D.tif	0.337304	-0.0113224	-0.273386	-0.1679	-0.272435	0.171561	0.230556	-0.118487	0.236489	0.121913	0.123872	-0.170976	0.128918	0.168322	0.0185054	-0.212195	0.0241314	0.211666	-0.0882896	-0.242853	-0.0818897	0.246498	-0.19486	-0.275638	-0.188915	0.279411
99500_6w_G1_D.tif	0.380081	-0.0137394	-0.300631	-0.153048	-0.299656	0.187902	0.263798	-0.101996	0.258642	0.0902172	0.144592	-0.14925	0.139675	0.143212	0.0244951	-0.18212	0.0194119	0.180254	-0.0950815	-0.215593	-0.100353	0.21446	-0.214563	-0.248857	-0.220411	0.24856
99503_6w_G1_D.tif	0.368786	-0.00712772	-0.293619	-0.184396	-0.293105	0.148829	0.253484	-0.114553	0.258622	0.11061	0.133699	-0.155085	0.143523	0.157662	0.0153369	-0.185414	0.027744	0.193825	-0.102965	-0.21103	-0.0878936	0.227535	-0.22	-0.242122	-0.203613	0.261265
99507_6w_G1_D.tif	0.373271	-0.0089049	-0.296248	-0.169423	-0.297338	0.172931	0.256481	-0.0978574	0.255519	0.0901438	0.140024	-0.152068	0.139309	0.142735	0.0225867	-0.18938	0.0237099	0.188638	-0.0964394	-0.21685	-0.0938656	0.224839	-0.215168	-0.245952	-0.21184	0.261149
99508_6w_G1_D.tif	0.372776	-0.00788693	-0.297682	-0.153792	-0.291902	0.188059	0.25998	-0.108978	0.253768	0.0976595	0.141457	-0.153468	0.137799	0.15015	0.0231949	-0.188534	0.0203396	0.185673	-0.0954832	-0.219488	-0.0971594	0.216183	-0.212982	-0.255062	-0.214107	0.249484
99515_6w_G1_D.tif	0.363821	-0.00529262	-0.287258	-0.195403	-0.279319	0.181939	0.24331	-0.0944461	0.257006	0.10997	0.127488	-0.14892	0.141661	0.151916	0.011184	-0.18645	0.0286757	0.192728	-0.103594	-0.224685	-0.0859282	0.224388	-0.217604	-0.265071	-0.199442	0.259326
99519_6w_G1_D.tif	0.370286	-0.0153648	-0.291722	-0.16737	-0.29161	0.187491	0.254656	-0.101737	0.252752	0.0922452	0.137561	-0.147065	0.135853	0.143513	0.0215262	-0.184794	0.0212631	0.189995	-0.0935279	-0.223952	-0.0953276	0.225086	-0.209654	-0.258266	-0.212055	0.260218
99540_6w_G1_D.tif	0.365496	0.00862557	-0.287925	-0.21372	-0.277512	0.174228	0.248886	-0.0977394	0.2551	0.102734	0.128475	-0.146717	0.144206	0.154443	0.0090881	-0.184042	0.0305519	0.190041	-0.109258	-0.220039	-0.0833673	0.223537	-0.227912	-0.25429	-0.195828	0.262938
99548_6w_G1_D.tif	0.358242	-0.0101287	-0.286536	-0.171718	-0.285255	0.173822	0.245493	-0.106059	0.246864	0.101644	0.132233	-0.156741	0.135207	0.154789	0.0193931	-0.194962	0.0236089	0.196967	-0.0934273	-0.229379	-0.0880879	0.23478	-0.206738	-0.262436	-0.200996	0.269423
99553_6w_G1_D.tif	0.38008	0.00472839	-0.312789	-0.125008	-0.29434	0.176148	0.261546	-0.0944813	0.258211	0.0969339	0.139711	-0.143645	0.14063	0.144429	0.0188221	-0.182829	0.0234424	0.178142	-0.0997811	-0.229125	-0.0916685	0.211239	-0.217003	-0.28089	-0.206862	0.244358
99555_6w_G1_D.tif	0.372103	-0.0183757	-0.292265	-0.154756	-0.294954	0.193859	0.257631	-0.102735	0.253129	0.0916046	0.142168	-0.153823	0.135558	0.144905	0.0257087	-0.189452	0.0180155	0.186091	-0.0912538	-0.220005	-0.100813	0.218678	-0.207295	-0.254013	-0.217732	0.258022
99556_6w_G1_D.tif	0.379354	-0.010726	-0.300386	-0.152876	-0.301737	0.181285	0.262349	-0.0969823	0.256755	0.0857968	0.144353	-0.150064	0.137473	0.1364	0.0253218	-0.185847	0.0193242	0.179884	-0.093888	-0.217279	-0.0983715	0.220979	-0.212993	-0.248699	-0.217556	0.258129
99561_6w_G1_D.tif	0.37427	-0.0146664	-0.295433	-0.172956	-0.295903	0.171778	0.254936	-0.102407	0.261367	0.102892	0.135918	-0.14741	0.143435	0.151565	0.0182982	-0.184075	0.0241285	0.184961	-0.0992334	-0.216196	-0.0944104	0.2172	-0.216588	-0.248283	-0.210785	0.257597
99571_6w_G1_D.tif	0.33018	-0.014414	-0.265002	-0.181284	-0.267251	0.179257	0.226407	-0.121375	0.23137	0.119684	0.121782	-0.172079	0.127382	0.173046	0.0188447	-0.214237	0.0238035	0.216225	-0.0858046	-0.246789	-0.081234	0.251837	-0.192485	-0.273858	-0.187991	0.283987
99572_6w_G1_D.tif	0.382717	-0.0137115	-0.305043	-0.142919	-0.305311	0.17011	0.262984	-0.0960474	0.26076	0.0889203	0.14299	-0.145052	0.139934	0.138041	0.0233469	-0.18162	0.0207387	0.179825	-0.0959016	-0.215245	-0.0975624	0.218445	-0.213505	-0.256944	-0.216148	0.256197
99583_6w_G1_D.tif	0.375994	-0.00899329	-0.296152	-0.171019	-0.293497	0.19178	0.258787	-0.095455	0.256835	0.0899345	0.141586	-0.150255	0.139529	0.141971	0.0225281	-0.186322	0.0217065	0.182881	-0.0974885	-0.216068	-0.0973905	0.216724	-0.216584	-0.248846	-0.215854	0.253668
99586_6w_G1_D.tif	0.354019	-0.00275579	-0.287347	-0.15444	-0.280935	0.182772	0.247195	-0.115471	0.242426	0.109396	0.135809	-0.169475	0.131237	0.15661	0.0225676	-0.203089	0.0222234	0.200319	-0.0910717	-0.232625	-0.0892061	0.2321	-0.20458	-0.263516	-0.202338	0.260175
99595_6w_G1_D.tif	0.380452	-0.0124909	-0.299695	-0.169966	-0.299574	0.183926	0.261283	-0.0937145	0.26041	0.0863298	0.142565	-0.146022	0.14265	0.142469	0.0225318	-0.181987	0.0225186	0.181129	-0.098035	-0.213456	-0.0981362	0.215251	-0.218745	-0.243893	-0.218225	0.252425
99604_6w_G1_D.tif	0.360082	-0.00907978	-0.285204	-0.180914	-0.281304	0.188794	0.246298	-0.102809	0.249628	0.103473	0.132857	-0.155975	0.136899	0.154173	0.0186122	-0.193614	0.0236391	0.193384	-0.095977	-0.227199	-0.0901237	0.228062	-0.210842	-0.259785	-0.204566	0.26149
99608_6w_G1_D.tif	0.365436	-0.0088499	-0.294401	-0.161898	-0.289226	0.168124	0.248829	-0.104745	0.255693	0.1115	0.13268	-0.154345	0.140124	0.155747	0.0175785	-0.192828	0.0250502	0.190447	-0.0978174	-0.22482	-0.0889119	0.224416	-0.212091	-0.261545	-0.202943	0.258796
99610_6w_G1_D.tif	0.351175	-0.00102788	-0.28947	-0.160097	-0.276577	0.172766	0.23951	-0.104545	0.243914	0.112625	0.127614	-0.159265	0.135279	0.162662	0.0167021	-0.20288	0.0265537	0.20047	-0.0945373	-0.241155	-0.0818985	0.234485	-0.20625	-0.278199	-0.192016	0.264161
99619_6w_G1_D.tif	0.36839	-0.0082796	-0.295062	-0.155208	-0.294343	0.174963	0.253885	-0.102417	0.252603	0.0979219	0.13936	-0.15917	0.137368	0.148697	0.0231358	-0.194811	0.0222651	0.18965	-0.0939058	-0.222708	-0.0940305	0.222915	-0.21034	-0.253104	-0.209325	0.261551
99623_6w_G1_D2.tif	0.363725	-0.0213783	-0.283966	-0.15543	-0.290427	0.199547	0.254092	-0.111465	0.246461	0.0944259	0.142189	-0.163755	0.131141	0.149789	0.0275961	-0.193531	0.0142275	0.188014	-0.0868002	-0.222346	-0.100915	0.227047	-0.200301	-0.25492	-0.217024	0.264003
99625_6w_G1_D.tif	0.357134	-0.0087271	-0.285211	-0.175235	-0.286005	0.164211	0.250405	-0.124698	0.24495	0.105286	0.134775	-0.163917	0.134478	0.160604	0.019197	-0.190071	0.0235676	0.203531	-0.0941164	-0.221749	-0.0891636	0.235436	-0.207991	-0.252349	-0.202019	0.267678
99626_6w_G1_D.tif	0.360519	-0.0109945	-0.292509	-0.163292	-0.292251	0.153932	0.245619	-0.102079	0.250245	0.10062	0.13348	-0.159692	0.139311	0.157978	0.019523	-0.195281	0.0271857	0.201019	-0.0944046	-0.227482	-0.0863796	0.235308	-0.209328	-0.257386	-0.201009	0.267349
99629_6w_G1_D.tif	0.3541	-0.00687464	-0.28589	-0.172849	-0.280539	0.176152	0.242122	-0.105398	0.246161	0.10761	0.130803	-0.16128	0.136733	0.161363	0.0185336	-0.200191	0.026029	0.200873	-0.0949207	-0.231474	-0.0863533	0.231589	-0.208234	-0.264042	-0.198545	0.264521
99639_6w_G1_D.tif	0.382853	-0.0183995	-0.298034	-0.172208	-0.298094	0.194913	0.263556	-0.0972001	0.262578	0.0882291	0.143561	-0.144041	0.142264	0.141497	0.0223678	-0.176303	0.0206984	0.180061	-0.0985633	-0.208422	-0.10182	0.211431	-0.218145	-0.245709	-0.223222	0.246152
99644_6w_G1_D2.tif	0.368899	0.00170871	-0.303395	-0.162526	-0.291434	0.155583	0.249652	-0.09162	0.257197	0.101757	0.134346	-0.155397	0.145063	0.156605	0.0157902	-0.190871	0.0303311	0.192175	-0.102176	-0.224346	-0.0852274	0.221084	-0.219452	-0.261009	-0.199594	0.256857
99648_6w_G1_D.tif	0.328611	-0.00626792	-0.26834	-0.183454	-0.260959	0.18216	0.224419	-0.115328	0.230357	0.120758	0.120323	-0.172151	0.129313	0.176875	0.0162757	-0.215141	0.0266095	0.216935	-0.0894989	-0.249433	-0.0777644	0.248695	-0.196102	-0.282437	-0.183243	0.278789
99651_6w_G1_D.tif	0.356689	-0.00357797	-0.290289	-0.174367	-0.281505	0.169171	0.241004	-0.0966275	0.248229	0.103832	0.128315	-0.153658	0.138405	0.156482	0.0156092	-0.195891	0.0292913	0.20196	-0.0965197	-0.236644	-0.0830024	0.232542	-0.211135	-0.268911	-0.195091	0.26569
99662_6w_G1_D.tif	0.384466	-0.0025907	-0.304371	-0.187055	-0.296341	0.177027	0.25835	-0.0802676	0.267258	0.0895746	0.137701	-0.138859	0.148821	0.140776	0.015133	-0.176939	0.0285723	0.177838	-0.107606	-0.210613	-0.0920455	0.211059	-0.228667	-0.249612	-0.211272	0.249661
99667_6w_G1_D.tif	0.344544	-0.00444803	-0.27862	-0.17567	-0.277659	0.16481	0.236251	-0.112638	0.239224	0.111979	0.128161	-0.170596	0.131713	0.162137	0.018932	-0.208139	0.0255945	0.208113	-0.0916969	-0.235401	-0.0830849	0.242337	-0.202274	-0.263647	-0.191084	0.281162
99671_6w_G1_D.tif	0.355979	-0.00552313	-0.286295	-0.172495	-0.284385	0.168738	0.245393	-0.109574	0.244952	0.102906	0.132926	-0.162649	0.135193	0.157974	0.0195008	-0.197654	0.0245886	0.200127	-0.0938552	-0.228711	-0.0875661	0.233526	-0.20762	-0.258573	-0.198812	0.271909
99678_6w_G1_D.tif	0.355644	-0.0204165	-0.283163	-0.144436	-0.284776	0.196233	0.247545	-0.112719	0.243523	0.103806	0.138217	-0.168114	0.131172	0.159254	0.0260823	-0.20016	0.0170445	0.195982	-0.0863554	-0.230075	-0.0961184	0.230219	-0.197323	-0.268366	-0.211492	0.258794
99682_6w_G1_D.tif	0.375961	-0.00996732	-0.300933	-0.160259	-0.301238	0.153462	0.25515	-0.0975999	0.261327	0.100833	0.136984	-0.150126	0.14165	0.141788	0.0187665	-0.185001	0.0251078	0.185155	-0.0986201	-0.217137	-0.0907363	0.226806	-0.215532	-0.251669	-0.207886	0.263714
99685_6w_G1_D.tif	0.33741	0.000541307	-0.27664	-0.195696	-0.266927	0.147532	0.229093	-0.117714	0.23983	0.126354	0.118173	-0.16699	0.136769	0.178399	0.00908912	-0.204515	0.0327469	0.217867	-0.0996899	-0.237483	-0.07359	0.244576	-0.208173	-0.272581	-0.17809	0.279709
99694_6w_G1_D.tif	0.330431	-0.0238294	-0.259176	-0.156142	-0.269636	0.208466	0.232512	-0.126358	0.222616	0.106268	0.132145	-0.183401	0.117097	0.165201	0.0292636	-0.218245	0.0115822	0.210008	-0.0746802	-0.24586	-0.0939093	0.250286	-0.178038	-0.276328	-0.200208	0.289934
99696_6w_G1_D.tif	0.326238	-0.0316245	-0.25324	-0.192128	-0.272144	0.177658	0.223478	-0.128568	0.229927	0.11599	0.122858	-0.179381	0.126521	0.177843	0.0201377	-0.209009	0.0206367	0.220571	-0.0821399	-0.236954	-0.0855205	0.25878	-0.184237	-0.267956	-0.192515	0.294778
99701_6w_G1_D.tif	0.3257	-0.0117974	-0.261403	-0.188581	-0.259954	0.192906	0.221944	-0.113312	0.227737	0.11646	0.121651	-0.176296	0.127415	0.176169	0.01868	-0.217462	0.0236648	0.215628	-0.0866162	-0.248481	-0.0806302	0.25117	-0.191904	-0.280853	-0.186284	0.284449
99702_6w_G1_D.tif	0.33336	-0.00954947	-0.270065	-0.182557	-0.266952	0.171422	0.225306	-0.114011	0.235057	0.12179	0.119117	-0.167556	0.130199	0.17182	0.0146487	-0.210313	0.0261793	0.212876	-0.0899104	-0.247605	-0.07781	0.250034	-0.19605	-0.280553	-0.18308	0.284203
99705_6w_G1_D.tif	0.371046	-0.00367379	-0.293866	-0.185445	-0.293098	0.169273	0.253996	-0.0956248	0.253616	0.0866929	0.136698	-0.148256	0.139703	0.142493	0.0194039	-0.187201	0.0261313	0.191717	-0.0991071	-0.21804	-0.0902163	0.228411	-0.217989	-0.247789	-0.206317	0.267441
99707_6w_G1_D.tif	0.380359	-0.0219667	-0.297741	-0.159284	-0.298893	0.195328	0.261846	-0.0963993	0.260753	0.0892681	0.143934	-0.147014	0.140829	0.143578	0.0244991	-0.181226	0.0189056	0.17973	-0.0955154	-0.211365	-0.10223	0.213485	-0.213409	-0.251366	-0.223337	0.247232
99713_6w_G1_D.tif	0.363996	0.00943911	-0.291056	-0.197219	-0.280791	0.170793	0.246029	-0.0929584	0.254181	0.104987	0.130178	-0.153135	0.140604	0.145077	0.0124317	-0.190799	0.0293901	0.188988	-0.104905	-0.224542	-0.0820813	0.230932	-0.222401	-0.257571	-0.195576	0.266009
99720_6w_G1_D.tif	0.359909	-0.0156354	-0.284923	-0.165099	-0.288681	0.182112	0.248837	-0.109913	0.246784	0.0994309	0.136106	-0.15914	0.133861	0.153696	0.0242608	-0.199967	0.0212107	0.197732	-0.0905001	-0.225196	-0.0942632	0.229138	-0.204427	-0.254287	-0.208174	0.267129
99726_6w_G1_D.tif	0.369247	-0.00650295	-0.294965	-0.165318	-0.293858	0.169083	0.253622	-0.103788	0.254836	0.101015	0.137337	-0.156136	0.13872	0.147697	0.0203047	-0.190472	0.0235066	0.188142	-0.0963295	-0.22158	-0.0917745	0.225158	-0.213451	-0.250463	-0.207194	0.263164
99732_6w_G1_D.tif	0.386528	-0.0159702	-0.306841	-0.139594	-0.305047	0.185924	0.267124	-0.0962025	0.263347	0.0883281	0.145971	-0.142724	0.141878	0.140056	0.0248165	-0.17897	0.0195325	0.175904	-0.0956908	-0.216425	-0.102104	0.208567	-0.216232	-0.25248	-0.223281	0.243586
99735_6w_G1_D.tif	0.382163	-0.00992716	-0.303629	-0.158155	-0.297371	0.190491	0.261299	-0.0867293	0.259991	0.0846762	0.141431	-0.139017	0.140588	0.136017	0.0223018	-0.183144	0.022693	0.180782	-0.0978851	-0.21969	-0.0975127	0.213023	-0.217452	-0.258046	-0.216617	0.24972
99738_6w_G1_D.tif	0.348136	-0.00897722	-0.279699	-0.168776	-0.272883	0.184933	0.238811	-0.115671	0.243117	0.119809	0.127057	-0.162948	0.131953	0.164363	0.0174398	-0.203346	0.0220056	0.199561	-0.0932853	-0.234556	-0.0862948	0.234235	-0.201283	-0.276112	-0.195074	0.267485
99740_6w_G1_D.tif	0.33573	0.000824282	-0.27577	-0.189283	-0.261252	0.172387	0.224246	-0.105749	0.239288	0.127767	0.115679	-0.161791	0.134415	0.172725	0.00964721	-0.208622	0.0292504	0.205914	-0.096531	-0.249699	-0.0725307	0.246991	-0.204033	-0.287328	-0.17814	0.275863
99744_6w_G1_D2.tif	0.3823	-0.0122827	-0.305665	-0.152281	-0.30549	0.168549	0.26427	-0.0997798	0.261568	0.088619	0.144694	-0.149947	0.143952	0.147016	0.0231653	-0.179846	0.0229047	0.18212	-0.0973222	-0.212846	-0.0975048	0.215825	-0.21834	-0.2437	-0.218532	0.248555
99746_6w_G1_D.tif	0.372725	0.000105781	-0.305187	-0.151644	-0.296279	0.158127	0.255573	-0.096926	0.256547	0.096636	0.13798	-0.152519	0.142614	0.151116	0.0197786	-0.191278	0.0269605	0.188707	-0.0989509	-0.223751	-0.088837	0.222089	-0.217787	-0.256255	-0.205138	0.25559
99747_6w_G1_D.tif	0.376597	0.00147469	-0.302883	-0.187059	-0.291124	0.161523	0.252185	-0.0871318	0.264467	0.100889	0.130894	-0.138669	0.148028	0.146443	0.011648	-0.181826	0.0323304	0.187479	-0.107945	-0.218947	-0.0850869	0.218363	-0.227506	-0.256068	-0.201603	0.253528
99749_6w_G1_D.tif	0.341188	-0.00945416	-0.280987	-0.128994	-0.276967	0.179736	0.237821	-0.119248	0.232725	0.112768	0.130707	-0.171377	0.127207	0.169899	0.0249213	-0.218139	0.0207614	0.209368	-0.0832313	-0.250167	-0.0869948	0.238997	-0.191644	-0.282246	-0.195507	0.268857
99750_6w_G1_D.tif	0.388895	-0.00964108	-0.311026	-0.14538	-0.306074	0.176392	0.267962	-0.0943426	0.265625	0.0882894	0.145051	-0.140335	0.144251	0.138598	0.0229648	-0.17904	0.0231349	0.178136	-0.0995528	-0.212645	-0.0992887	0.207575	-0.221297	-0.249502	-0.220645	0.241896
99752_6w_G1_D.tif	0.373531	-0.000147343	-0.301614	-0.178734	-0.290642	0.166686	0.252445	-0.0910381	0.261163	0.101222	0.134386	-0.148527	0.146248	0.150986	0.0143967	-0.18467	0.0303324	0.189029	-0.105488	-0.21759	-0.0870821	0.218177	-0.223898	-0.25624	-0.203778	0.250847
99757_6w_G1_D.tif	0.376385	-0.000151213	-0.300409	-0.176958	-0.297434	0.158465	0.259659	-0.101737	0.257121	0.089187	0.137955	-0.145224	0.141501	0.142811	0.0184045	-0.181896	0.0251852	0.184588	-0.100386	-0.216421	-0.0905126	0.225903	-0.220706	-0.244823	-0.206763	0.266255
99763_6w_G1_D.tif	0.377144	-0.00545494	-0.300999	-0.179312	-0.29901	0.153982	0.255419	-0.0934569	0.262547	0.095309	0.136773	-0.148765	0.146282	0.148217	0.0166414	-0.182944	0.0281238	0.185673	-0.103647	-0.211293	-0.0899258	0.22107	-0.222526	-0.245092	-0.206824	0.262068
99766_6w_G1_D.tif	0.376729	-0.00550855	-0.302081	-0.168797	-0.298538	0.163137	0.25657	-0.0927865	0.259977	0.0919634	0.138178	-0.147634	0.144278	0.147226	0.0197536	-0.188307	0.0270035	0.187513	-0.101012	-0.21483	-0.0921463	0.217413	-0.22001	-0.2484	-0.208702	0.259012
99774_6w_G1_D.tif	0.316328	-0.00590969	-0.263144	-0.156545	-0.255132	0.193356	0.219841	-0.123203	0.217488	0.123069	0.121203	-0.18415	0.120123	0.180987	0.0223413	-0.230929	0.0214271	0.221747	-0.0793624	-0.264251	-0.078522	0.25494	-0.182204	-0.294718	-0.180388	0.285605
99780_6w_G1_D.tif	0.38544	-0.0158958	-0.306829	-0.151163	-0.304177	0.174781	0.263323	-0.091254	0.263714	0.0866777	0.141424	-0.135747	0.142859	0.138561	0.0213834	-0.176828	0.0228836	0.180184	-0.0983754	-0.215581	-0.0972896	0.214542	-0.217244	-0.25833	-0.217112	0.250052
98444_6w_G1_D.tif	0.33876	-0.00537457	-0.276083	-0.173224	-0.264507	0.190417	0.230256	-0.107458	0.236237	0.117068	0.122494	-0.162783	0.130638	0.168362	0.0164475	-0.210064	0.0247419	0.206331	-0.0908555	-0.24921	-0.0811365	0.239956	-0.198942	-0.285819	-0.188051	0.271798
98452_6w_G1_D.tif	0.385192	-0.0040051	-0.307695	-0.164833	-0.30123	0.169761	0.263214	-0.0933189	0.265652	0.0935052	0.140688	-0.142286	0.145688	0.141258	0.0183761	-0.177908	0.0250564	0.176493	-0.103158	-0.21208	-0.0945076	0.21167	-0.223922	-0.248449	-0.213354	0.250194
98455_6w_G1_D.tif	0.34825	9.8526e-05	-0.286299	-0.172003	-0.276019	0.16454	0.237422	-0.105121	0.241106	0.108173	0.126553	-0.16136	0.134785	0.16326	0.0155592	-0.201475	0.0278841	0.205419	-0.0947192	-0.239773	-0.0800328	0.239683	-0.20603	-0.275129	-0.188458	0.273688
98474_6w_G1_D.tif	0.363516	-0.00663477	-0.290176	-0.172917	-0.286836	0.176502	0.249565	-0.10491	0.251147	0.10341	0.134498	-0.156049	0.1366	0.149891	0.0190643	-0.191735	0.0231542	0.190081	-0.0961269	-0.224756	-0.0886065	0.232699	-0.211463	-0.257818	-0.204337	0.262237
98481_6w_G1_D.tif	0.331566	-0.017883	-0.263782	-0.176865	-0.266781	0.189087	0.228537	-0.122494	0.229561	0.115219	0.1235	-0.170819	0.124833	0.171059	0.0201867	-0.211579	0.0199014	0.21275	-0.0839864	-0.245466	-0.0846297	0.250748	-0.188393	-0.279416	-0.190514	0.28566
98482_6w_G1_D.tif	0.358815	0.00106494	-0.286633	-0.195891	-0.278691	0.175838	0.242266	-0.0953307	0.251101	0.10485	0.128803	-0.154444	0.140955	0.156221	0.0137008	-0.193753	0.0289137	0.19405	-0.101598	-0.228512	-0.0834296	0.229797	-0.218062	-0.259535	-0.196141	0.265645
98488_6w_G1_D.tif	0.366345	-0.00768248	-0.292977	-0.180494	-0.28951	0.168176	0.24752	-0.0933351	0.25428	0.0965861	0.132969	-0.150986	0.140526	0.14838	0.0166358	-0.187649	0.0278323	0.194963	-0.0991751	-0.222881	-0.0867697	0.231223	-0.214934	-0.25936	-0.202741	0.26306
98494_6w_G1_D.tif	0.325716	-0.0188046	-0.259528	-0.169278	-0.263901	0.197614	0.224416	-0.122284	0.226087	0.118066	0.122982	-0.175943	0.121322	0.170221	0.0227366	-0.220302	0.0193474	0.216811	-0.0791905	-0.254611	-0.08582	0.25099	-0.183498	-0.280551	-0.19067	0.28807
98512_6w_G1_D.tif	0.355392	-0.00936847	-0.287183	-0.150016	-0.283424	0.179267	0.247938	-0.117667	0.242059	0.105702	0.135289	-0.164892	0.131239	0.159503	0.0222353	-0.197575	0.0202415	0.198926	-0.0899929	-0.230995	-0.0903785	0.233439	-0.201027	-0.270351	-0.202388	0.264026
98514_6w_G1_D.tif	0.30372	-0.00187158	-0.247646	-0.207269	-0.238282	0.190469	0.206648	-0.12516	0.217395	0.138438	0.108545	-0.183756	0.123824	0.192964	0.0105885	-0.22688	0.0271328	0.228231	-0.0876891	-0.26499	-0.0693529	0.261704	-0.188511	-0.297245	-0.166371	0.295366
98515_6w_G1_D.tif	0.313814	-0.0120053	-0.251794	-0.177544	-0.248536	0.211179	0.218914	-0.12635	0.213588	0.118408	0.120863	-0.183805	0.114976	0.176168	0.0218407	-0.22477	0.0159944	0.218919	-0.0779334	-0.260365	-0.0813925	0.261021	-0.177862	-0.296007	-0.182473	0.295151
98526_6w_G1_D.tif	0.374165	-0.00432231	-0.302478	-0.16182	-0.298272	0.153098	0.254441	-0.099251	0.261969	0.1067	0.136835	-0.155321	0.144826	0.150926	0.0174774	-0.187645	0.0273729	0.185756	-0.100886	-0.218565	-0.089492	0.220381	-0.219762	-0.247388	-0.206196	0.257451
98537_6w_G1_D.tif	0.327495	-0.00220173	-0.264035	-0.187617	-0.256635	0.19083	0.224538	-0.117885	0.228569	0.123749	0.120662	-0.176773	0.12572	0.1731	0.015278	-0.21473	0.0229635	0.21158	-0.0894869	-0.249435	-0.0796682	0.246922	-0.194137	-0.284104	-0.181263	0.286564
98546_6w_G1_D.tif	0.35146	0.00337901	-0.285443	-0.186015	-0.275478	0.165974	0.237932	-0.101004	0.24483	0.109188	0.125487	-0.157774	0.13632	0.157819	0.0136206	-0.199673	0.0283618	0.199528	-0.098438	-0.235513	-0.0793909	0.239067	-0.210905	-0.270256	-0.188357	0.275279
98562_6w_G1_D.tif	0.35331	-0.0100952	-0.284343	-0.157142	-0.285607	0.17426	0.244974	-0.112153	0.241176	0.101845	0.135418	-0.169583	0.131912	0.159524	0.0230569	-0.2014	0.0210475	0.200211	-0.088885	-0.231106	-0.0904414	0.234744	-0.200465	-0.262729	-0.201153	0.273624
98565_6w_G1_D.tif	0.343166	-0.0128941	-0.276198	-0.156112	-0.275721	0.187004	0.237539	-0.113645	0.232681	0.103786	0.130174	-0.16719	0.125793	0.161596	0.0228625	-0.207124	0.0186259	0.204231	-0.0843125	-0.243626	-0.0878716	0.243255	-0.191528	-0.280138	-0.195211	0.280857
98581_6w_G1_D.tif	0.310194	-0.0194347	-0.245363	-0.179742	-0.25448	0.197936	0.218361	-0.139632	0.211557	0.120289	0.119773	-0.186564	0.113524	0.180585	0.0233273	-0.226169	0.0139775	0.222379	-0.07418	-0.257622	-0.0825843	0.267195	-0.172636	-0.286538	-0.181471	0.307316
98585_6w_G1_D.tif	0.332112	-0.00976825	-0.267213	-0.17734	-0.263388	0.196114	0.229617	-0.114813	0.226738	0.108496	0.125357	-0.170802	0.125375	0.170659	0.0211263	-0.214395	0.02004	0.209061	-0.0851799	-0.247953	-0.0835986	0.248625	-0.191637	-0.281553	-0.189347	0.28367
98588_6w_G1_D.tif	0.364972	-0.00786402	-0.294262	-0.166548	-0.291202	0.164388	0.247889	-0.0979906	0.253849	0.102381	0.134446	-0.157912	0.14026	0.153336	0.0187585	-0.193797	0.0266729	0.194821	-0.0975532	-0.222809	-0.0883931	0.227312	-0.212479	-0.258193	-0.202958	0.262876
98606_6w_G1_D.tif	0.329816	-0.00195551	-0.263473	-0.174611	-0.256403	0.208828	0.235392	-0.130472	0.219413	0.111128	0.128733	-0.177905	0.116239	0.164453	0.0228407	-0.214567	0.0147529	0.209042	-0.0827656	-0.248605	-0.0867286	0.248955	-0.188471	-0.281404	-0.189345	0.287114
98607_6w_G1_D.tif	0.327855	0.00011534	-0.265961	-0.178969	-0.257701	0.203671	0.231502	-0.115983	0.215293	0.0971314	0.127813	-0.172954	0.117865	0.163813	0.0249436	-0.220894	0.0189641	0.21427	-0.0825469	-0.251832	-0.0821989	0.255153	-0.189771	-0.28426	-0.186057	0.290738
98613_6w_G1_D.tif	0.332792	-0.00476749	-0.270446	-0.185041	-0.266418	0.169671	0.226066	-0.112599	0.231872	0.116168	0.120345	-0.168853	0.127889	0.166715	0.0155332	-0.211294	0.0264369	0.214831	-0.0897974	-0.247121	-0.0763224	0.254905	-0.196332	-0.280418	-0.181618	0.287803
98625_6w_G1_D.tif	0.369774	-0.0142567	-0.295062	-0.159417	-0.296687	0.169682	0.254171	-0.102693	0.253793	0.0945513	0.138857	-0.155521	0.139135	0.151602	0.021741	-0.187204	0.0224068	0.189841	-0.0943872	-0.219798	-0.0937828	0.225516	-0.210088	-0.25465	-0.209872	0.262346
98639_6w_G1_D.tif	0.339679	-0.0111579	-0.268541	-0.195886	-0.270469	0.176595	0.229748	-0.110657	0.237822	0.112553	0.121968	-0.163817	0.131176	0.164756	0.015453	-0.205172	0.0256157	0.210131	-0.0919678	-0.23865	-0.081848	0.246366	-0.200014	-0.270689	-0.188622	0.285629
98642_6w_G1_D.tif	0.378257	-0.00988629	-0.300184	-0.168556	-0.297323	0.176704	0.258843	-0.0959865	0.260108	0.092122	0.139278	-0.144774	0.141855	0.142379	0.0200084	-0.181982	0.0244537	0.185346	-0.0992164	-0.216047	-0.0946954	0.217962	-0.218203	-0.250877	-0.213182	0.253597
98564_6w_G1_D.tif	0.367761	0.0070648	-0.299853	-0.179149	-0.28625	0.157321	0.249465	-0.0974542	0.257449	0.108565	0.130193	-0.148324	0.143346	0.150024	0.013572	-0.192084	0.0309132	0.191178	-0.104908	-0.224046	-0.0821932	0.226736	-0.222909	-0.258054	-0.196586	0.258222
98658_6w_G1_D.tif	0.377991	-0.0059835	-0.302571	-0.16956	-0.299013	0.160664	0.257164	-0.0939805	0.260953	0.0927737	0.137275	-0.144531	0.144048	0.145081	0.018214	-0.183443	0.0264424	0.184866	-0.101184	-0.215827	-0.0913674	0.219953	-0.21993	-0.250555	-0.208022	0.260543
98668_6w_G1_D.tif	0.373973	-0.00136328	-0.302563	-0.17334	-0.292111	0.164026	0.253106	-0.0927901	0.261032	0.101463	0.134049	-0.146239	0.145657	0.150677	0.01483	-0.184416	0.02925	0.186931	-0.103931	-0.220259	-0.0871069	0.219856	-0.222464	-0.257132	-0.203722	0.252586
98669_6w_G1_D.tif	0.335442	-0.0141051	-0.270118	-0.166644	-0.274439	0.173541	0.230132	-0.117614	0.232255	0.113782	0.125506	-0.17308	0.12655	0.16748	0.021435	-0.214729	0.0215982	0.211314	-0.0842267	-0.244818	-0.0839393	0.24942	-0.190525	-0.27336	-0.18967	0.288813
98679_6w_G1_D.tif	0.361291	-0.00790921	-0.291899	-0.147593	-0.288709	0.174507	0.249572	-0.109458	0.24825	0.106149	0.136278	-0.163294	0.134883	0.155837	0.0218279	-0.197387	0.0213951	0.192786	-0.0920558	-0.229469	-0.0915102	0.226747	-0.205282	-0.264311	-0.204042	0.263396
98694_6w_G1_D.tif	0.341377	-0.0174526	-0.278405	-0.158552	-0.278486	0.162041	0.23334	-0.11922	0.239802	0.119687	0.124971	-0.166465	0.133327	0.175499	0.018686	-0.207936	0.0247945	0.21079	-0.0887131	-0.240465	-0.082896	0.243563	-0.196082	-0.275145	-0.191716	0.273656
98696_6w_G1_D.tif	0.37896	-0.0104302	-0.30642	-0.147514	-0.306538	0.137778	0.25919	-0.105352	0.263917	0.104176	0.13947	-0.153935	0.145217	0.151397	0.0194427	-0.183993	0.0259638	0.185782	-0.0993423	-0.213726	-0.0921098	0.220957	-0.21799	-0.244574	-0.20976	0.259433
98708_6w_G1_D.tif	0.363211	-0.0114668	-0.290601	-0.161262	-0.292323	0.165606	0.250395	-0.109875	0.24981	0.101234	0.136056	-0.160184	0.137325	0.157764	0.0212856	-0.194061	0.0219545	0.192328	-0.0934553	-0.222846	-0.0920137	0.227735	-0.207295	-0.25522	-0.204349	0.270246
98718_6w_G1_D.tif	0.324692	-0.0144666	-0.258677	-0.184147	-0.261716	0.190254	0.223659	-0.123722	0.22651	0.119847	0.122016	-0.179148	0.124772	0.176598	0.0189925	-0.215552	0.021172	0.216449	-0.0835856	-0.24954	-0.0832059	0.250953	-0.188091	-0.277536	-0.186539	0.290011
98723_6w_G1_D.tif	0.329957	-0.0195808	-0.263028	-0.159288	-0.268322	0.189377	0.230248	-0.133623	0.22811	0.121865	0.12548	-0.177668	0.122273	0.174694	0.0223301	-0.213749	0.0157981	0.210599	-0.0800125	-0.248123	-0.0880562	0.248088	-0.183023	-0.279628	-0.191755	0.287038
98745_6w_G1_D.tif	0.326576	-0.0141093	-0.262171	-0.191293	-0.261695	0.178052	0.218447	-0.11356	0.233028	0.125495	0.116093	-0.172139	0.130069	0.178205	0.0126629	-0.210705	0.0259102	0.215522	-0.0889541	-0.250285	-0.0770787	0.252453	-0.192165	-0.285656	-0.180722	0.28802
98755_6w_G1_D.tif	0.354765	-0.0108675	-0.285223	-0.165072	-0.281962	0.172482	0.244459	-0.118211	0.247829	0.117122	0.130777	-0.163093	0.136055	0.165649	0.0179886	-0.196996	0.0230887	0.197877	-0.0942839	-0.228378	-0.088505	0.229691	-0.205474	-0.264259	-0.199514	0.264055
98759_6w_G1_D.tif	0.37194	-0.00920566	-0.298598	-0.141843	-0.29778	0.17305	0.258062	-0.10852	0.254854	0.101604	0.141526	-0.15929	0.137402	0.148655	0.0241354	-0.192532	0.0204446	0.185786	-0.0933879	-0.221146	-0.0956441	0.221457	-0.210234	-0.253084	-0.21272	0.255069
98761_6w_G1_D.tif	0.351346	-0.00607371	-0.278903	-0.188884	-0.275323	0.18524	0.238808	-0.103167	0.244773	0.107729	0.128469	-0.160685	0.134655	0.157016	0.0164393	-0.198164	0.024932	0.198573	-0.0949821	-0.234018	-0.0853751	0.236032	-0.208007	-0.264598	-0.196831	0.271
98766_6w_G1_D.tif	0.360537	-0.00540168	-0.285846	-0.193812	-0.281211	0.173467	0.243039	-0.100407	0.254712	0.111229	0.128204	-0.15392	0.142687	0.160622	0.0134662	-0.19275	0.0278177	0.192065	-0.101977	-0.224332	-0.0860036	0.225289	-0.217093	-0.25659	-0.198333	0.26454
98771_6w_G1_D.tif	0.367235	-0.00522909	-0.294696	-0.174818	-0.288409	0.171766	0.249126	-0.0960463	0.254657	0.0997942	0.132457	-0.148037	0.140074	0.14804	0.0166871	-0.188831	0.0274049	0.193456	-0.0987037	-0.227035	-0.0877447	0.226155	-0.215453	-0.260177	-0.202636	0.260961
98773_6w_G1_D.tif	0.349608	-0.0102394	-0.278692	-0.17425	-0.276756	0.18282	0.239889	-0.11309	0.243174	0.113351	0.129124	-0.164236	0.132562	0.162006	0.0186194	-0.201558	0.0215665	0.197859	-0.0921282	-0.233248	-0.0875207	0.235724	-0.202185	-0.267395	-0.197259	0.272256
98808_6w_G1_D.tif	0.352418	-0.000924215	-0.288944	-0.180977	-0.27866	0.149132	0.237701	-0.107455	0.250301	0.121039	0.123885	-0.159248	0.141524	0.168736	0.011219	-0.197893	0.0317671	0.2038	-0.100926	-0.232803	-0.0783613	0.234174	-0.213923	-0.265578	-0.188	0.267997
98819_6w_G1_D.tif	0.351323	-0.0136364	-0.284782	-0.14876	-0.288554	0.152556	0.242176	-0.119406	0.243073	0.112328	0.13111	-0.166928	0.132497	0.163592	0.0211533	-0.202595	0.0217742	0.201171	-0.0880524	-0.23543	-0.0867386	0.241967	-0.198361	-0.264131	-0.196619	0.279273
98822_6w_G1_D.tif	0.340836	-0.0168276	-0.273001	-0.160293	-0.276457	0.180539	0.236417	-0.121942	0.233434	0.109647	0.128748	-0.169272	0.126991	0.168023	0.0222474	-0.207371	0.0189851	0.207332	-0.0842347	-0.24099	-0.0884055	0.242981	-0.190768	-0.274622	-0.194793	0.282797
98832_6w_G1_D.tif	0.377896	-0.00934757	-0.302287	-0.169153	-0.301894	0.149654	0.257857	-0.101421	0.262806	0.0986534	0.137867	-0.149257	0.145735	0.151199	0.0180295	-0.182412	0.0264367	0.185116	-0.101671	-0.21076	-0.0915413	0.22101	-0.220348	-0.243583	-0.208886	0.260301
98837_6w_G1_D.tif	0.308661	-0.00777593	-0.25522	-0.174244	-0.249382	0.184254	0.212822	-0.128805	0.213589	0.128092	0.114098	-0.183397	0.117688	0.185092	0.017282	-0.227784	0.0216665	0.226692	-0.0802755	-0.264711	-0.0731483	0.265932	-0.177647	-0.303501	-0.170135	0.300156
98839_6w_G1_D.tif	0.316093	-0.00805756	-0.262357	-0.146434	-0.259103	0.185724	0.225214	-0.140934	0.214101	0.12345	0.125042	-0.191005	0.116561	0.182632	0.0238613	-0.22439	0.0183718	0.224907	-0.0761513	-0.260853	-0.0802038	0.260468	-0.178254	-0.291069	-0.183175	0.285563
98841_6w_G1_D.tif	0.342292	-0.00818097	-0.272787	-0.186085	-0.27141	0.180403	0.234787	-0.112937	0.235959	0.108251	0.125848	-0.165027	0.129974	0.164367	0.0173885	-0.203709	0.0229943	0.205867	-0.0911637	-0.237443	-0.0839548	0.243531	-0.199428	-0.272272	-0.190499	0.283237
98856_6w_G1_D.tif	0.367727	-0.00739654	-0.292322	-0.175426	-0.289901	0.175281	0.250435	-0.0978085	0.254051	0.0981441	0.134573	-0.151274	0.138983	0.147513	0.0189979	-0.191319	0.0249523	0.19086	-0.097748	-0.222242	-0.09077	0.224874	-0.213769	-0.255646	-0.20521	0.264439
98858_6w_G1_D.tif	0.37168	-0.0103632	-0.292827	-0.174642	-0.288891	0.187547	0.254722	-0.101272	0.255687	0.097671	0.135693	-0.145076	0.13821	0.145014	0.0190453	-0.185217	0.0224379	0.18649	-0.0976252	-0.221456	-0.0940657	0.220908	-0.214154	-0.257328	-0.209912	0.257725
98864_6w_G1_D.tif	0.328447	-0.0157934	-0.269032	-0.154491	-0.273845	0.165829	0.225658	-0.119776	0.227346	0.115183	0.124298	-0.178727	0.125039	0.173524	0.0224158	-0.220096	0.0233515	0.221068	-0.0805151	-0.252864	-0.0811591	0.255345	-0.18557	-0.279055	-0.186434	0.289851
98866_6w_G1_D.tif	0.350382	-0.0240656	-0.273882	-0.169846	-0.285227	0.184345	0.243264	-0.118459	0.239077	0.0994472	0.133439	-0.16249	0.127931	0.156199	0.0256658	-0.202905	0.0179927	0.203769	-0.0847825	-0.22883	-0.093551	0.24216	-0.19454	-0.258714	-0.20577	0.279388
98886_6w_G1_D.tif	0.359309	-0.0049263	-0.291578	-0.170337	-0.287764	0.163442	0.24806	-0.105937	0.246542	0.0963031	0.135002	-0.160829	0.139514	0.164396	0.0195516	-0.194038	0.0253301	0.196122	-0.0951479	-0.227347	-0.0873008	0.231373	-0.211285	-0.255845	-0.200233	0.267624
98892_6w_G1_D.tif	0.334904	-0.0156077	-0.271143	-0.160614	-0.268068	0.187369	0.228841	-0.115296	0.232811	0.117683	0.123182	-0.167266	0.127221	0.171973	0.0197143	-0.213648	0.0206598	0.208509	-0.0854389	-0.24864	-0.0838809	0.244949	-0.189454	-0.288833	-0.189348	0.279421
98900_6w_G1_D.tif	0.335348	-0.0125335	-0.274638	-0.146707	-0.277733	0.155407	0.229791	-0.12277	0.233996	0.123605	0.124645	-0.177117	0.126433	0.168369	0.0202861	-0.21589	0.0234226	0.216035	-0.083773	-0.248779	-0.0820561	0.249423	-0.189079	-0.277334	-0.186642	0.288291
98904_6w_G1_D.tif	0.337617	-0.0197621	-0.269456	-0.153338	-0.276793	0.180075	0.235099	-0.127723	0.230682	0.112219	0.128563	-0.172642	0.123242	0.166984	0.0236657	-0.20967	0.0166852	0.209046	-0.080658	-0.24381	-0.0889963	0.247482	-0.185298	-0.276769	-0.194353	0.287908
98919_6w_G1_D.tif	0.348081	-0.0175245	-0.282046	-0.142247	-0.287702	0.158106	0.240992	-0.12096	0.239051	0.109011	0.13147	-0.167417	0.129804	0.164518	0.0235571	-0.206626	0.0209543	0.207033	-0.0850555	-0.237398	-0.087674	0.244377	-0.193785	-0.269382	-0.197645	0.27851
98923_6w_G1_D.tif	0.337099	-0.00985918	-0.276891	-0.170935	-0.271801	0.160067	0.227923	-0.114499	0.238602	0.123732	0.120934	-0.168852	0.133291	0.174496	0.0138627	-0.206092	0.0284295	0.21496	-0.0911474	-0.246209	-0.077858	0.245662	-0.198251	-0.28003	-0.184192	0.277559
98931_6w_G1_D.tif	0.365623	-0.0120561	-0.293554	-0.148205	-0.293621	0.171001	0.252877	-0.109118	0.249538	0.0986283	0.137419	-0.155894	0.134909	0.150803	0.0226178	-0.191875	0.0212464	0.193289	-0.0912792	-0.227926	-0.0929473	0.228262	-0.20572	-0.261462	-0.207107	0.264554
98937_6w_G1_D.tif	0.33527	-0.0188624	-0.267482	-0.167632	-0.27182	0.185452	0.230278	-0.118079	0.23095	0.110871	0.125336	-0.170107	0.125296	0.167986	0.020756	-0.208728	0.0194635	0.21045	-0.0828139	-0.246722	-0.0862905	0.247811	-0.187539	-0.280438	-0.191405	0.287999
98940_6w_G1_D.tif	0.339138	-0.0120749	-0.269507	-0.177074	-0.271548	0.185181	0.235328	-0.120926	0.231914	0.108973	0.127929	-0.170685	0.124441	0.160679	0.0202036	-0.204665	0.0208941	0.211826	-0.0862528	-0.239432	-0.0860348	0.247842	-0.193187	-0.273196	-0.193318	0.283552
98948_6w_G1_D.tif	0.328586	-0.0126585	-0.262389	-0.177551	-0.261512	0.19551	0.227198	-0.124904	0.229891	0.124124	0.123063	-0.176198	0.125089	0.174297	0.019898	-0.216934	0.0196094	0.210436	-0.0849565	-0.247856	-0.0843687	0.247276	-0.190356	-0.277216	-0.189753	0.281674
98972_6w_G1_D.tif	0.33868	-0.00919437	-0.271017	-0.175923	-0.269817	0.186033	0.236694	-0.125055	0.233247	0.114931	0.128566	-0.173333	0.128393	0.171683	0.0205422	-0.208719	0.0198521	0.205415	-0.088301	-0.237481	-0.0866601	0.241742	-0.196624	-0.268291	-0.193555	0.278192
98974_6w_G1_D.tif	0.337904	-0.00570131	-0.270692	-0.188469	-0.266841	0.177947	0.231393	-0.1179	0.236859	0.12089	0.122163	-0.167182	0.131229	0.17124	0.01584	-0.210123	0.0245479	0.207466	-0.0930374	-0.23927	-0.0817138	0.241757	-0.200889	-0.271749	-0.186762	0.281093
98979_6w_G1_D.tif	0.320698	-0.00613547	-0.259994	-0.169114	-0.259866	0.176147	0.224564	-0.139823	0.222942	0.133936	0.120733	-0.18771	0.120695	0.181507	0.0178777	-0.22009	0.0179959	0.213847	-0.0828329	-0.251859	-0.0812202	0.251901	-0.183707	-0.281986	-0.177884	0.29938
98990_6w_G1_D.tif	0.345262	-0.0093323	-0.277636	-0.178553	-0.271872	0.184239	0.235796	-0.110477	0.241122	0.113806	0.126593	-0.164373	0.133543	0.166695	0.0164556	-0.201278	0.0251762	0.205852	-0.0928812	-0.237959	-0.0847691	0.236002	-0.202667	-0.273534	-0.194122	0.26891
99022_6w_G1_D.tif	0.338411	-0.0182253	-0.274059	-0.16488	-0.281362	0.153792	0.2323	-0.119825	0.234711	0.110624	0.12655	-0.172015	0.130158	0.172101	0.0213158	-0.210915	0.0237686	0.214851	-0.0855446	-0.238484	-0.0829329	0.252437	-0.192633	-0.267533	-0.190683	0.288073
99024_6w_G1_D.tif	0.368086	-0.0183823	-0.289409	-0.173252	-0.294392	0.171355	0.250113	-0.103128	0.257074	0.103232	0.134981	-0.154152	0.140171	0.152202	0.0192935	-0.187904	0.0228086	0.188915	-0.0959862	-0.218066	-0.093692	0.224654	-0.210407	-0.251484	-0.20864	0.26601
99031_6w_G1_D.tif	0.356774	-0.0149714	-0.286529	-0.16302	-0.29102	0.155491	0.245649	-0.11519	0.246777	0.105083	0.132979	-0.162551	0.135669	0.160665	0.0204304	-0.19542	0.0238954	0.202339	-0.0911737	-0.227718	-0.0885464	0.237276	-0.204006	-0.255989	-0.200899	0.274006
99032_6w_G1_D.tif	0.341658	-0.00705286	-0.277906	-0.159113	-0.27468	0.176154	0.237382	-0.120345	0.234692	0.113932	0.129196	-0.17224	0.128668	0.1687	0.0212523	-0.210471	0.0206987	0.204253	-0.0877532	-0.239901	-0.0851423	0.242209	-0.195809	-0.273627	-0.192256	0.277502
99036_6w_G1_D.tif	0.333433	-0.0154951	-0.269508	-0.167872	-0.273105	0.171678	0.231284	-0.124132	0.228674	0.110357	0.12598	-0.173539	0.126258	0.173384	0.0208608	-0.209559	0.0215231	0.215535	-0.0836979	-0.244101	-0.08334	0.252327	-0.189286	-0.276237	-0.189078	0.287655
99048_6w_G1_D.tif	0.36698	-0.00748219	-0.294986	-0.168634	-0.291958	0.166841	0.250075	-0.0980733	0.253974	0.0986718	0.134996	-0.153481	0.140194	0.151157	0.0192429	-0.191984	0.0258686	0.192021	-0.0972893	-0.223381	-0.0889667	0.227792	-0.21368	-0.255958	-0.20445	0.262512
99054_6w_G1_D.tif	0.341161	-0.0165339	-0.273971	-0.164241	-0.280501	0.166799	0.2353	-0.118598	0.234051	0.106617	0.128688	-0.170729	0.127387	0.164251	0.0216798	-0.205821	0.0210685	0.210012	-0.0845513	-0.239403	-0.0853621	0.250578	-0.191726	-0.27058	-0.193223	0.28765
99059_6w_G1_D.tif	0.340262	-0.00831778	-0.278473	-0.173658	-0.273538	0.160976	0.229668	-0.109821	0.239702	0.119047	0.121959	-0.165506	0.133547	0.169744	0.0152866	-0.208289	0.0279896	0.211231	-0.0923936	-0.242304	-0.0782264	0.246155	-0.200182	-0.277502	-0.185601	0.278246
99064_6w_G1_D.tif	0.327411	-0.0125379	-0.27108	-0.170472	-0.267367	0.151833	0.220307	-0.12286	0.237041	0.140332	0.116469	-0.177784	0.133485	0.186811	0.0126198	-0.2147	0.0291604	0.219125	-0.0902915	-0.249561	-0.0741074	0.251135	-0.194792	-0.280784	-0.178855	0.279465
99069_6w_G1_D.tif	0.32118	-0.0145652	-0.254376	-0.184441	-0.254204	0.201898	0.221156	-0.125996	0.223899	0.123934	0.119658	-0.179548	0.121157	0.176536	0.017463	-0.215638	0.018752	0.216443	-0.0829573	-0.252964	-0.0838118	0.251024	-0.183738	-0.288632	-0.184177	0.291951
99075_6w_G1_D.tif	0.297678	-0.0179673	-0.245862	-0.204716	-0.24553	0.153732	0.196293	-0.133215	0.224031	0.157418	0.100398	-0.186481	0.129816	0.208453	0.0063433	-0.227564	0.0342745	0.243961	-0.0887388	-0.26153	-0.062351	0.272373	-0.18462	-0.297263	-0.16173	0.292798
99082_6w_G1_D.tif	0.350248	-0.0125105	-0.282012	-0.177899	-0.278166	0.173932	0.239201	-0.110573	0.244799	0.110408	0.127458	-0.158554	0.136749	0.1671	0.0170427	-0.198796	0.02697	0.20686	-0.0944483	-0.232529	-0.0850028	0.235239	-0.205976	-0.267558	-0.196862	0.26488
99088_6w_G1_D.tif	0.365952	-0.000996282	-0.299141	-0.170537	-0.292469	0.137831	0.247446	-0.100296	0.256931	0.107613	0.130609	-0.153135	0.144001	0.155981	0.0147917	-0.192341	0.0305188	0.194275	-0.100887	-0.225961	-0.0826304	0.231889	-0.218588	-0.252638	-0.196535	0.268314
99090_6w_G1_D.tif	0.352905	-0.0156891	-0.287221	-0.14362	-0.284231	0.177113	0.24375	-0.114058	0.245067	0.112029	0.133127	-0.164559	0.13516	0.167475	0.0220589	-0.20196	0.0229201	0.202152	-0.089408	-0.236229	-0.0892368	0.231948	-0.20126	-0.270578	-0.203632	0.255976
99091_6w_G1_D.tif	0.32414	-0.0209008	-0.263545	-0.135693	-0.275161	0.165828	0.226569	-0.135585	0.222253	0.120172	0.126661	-0.190301	0.12041	0.180543	0.0253477	-0.221977	0.016798	0.219475	-0.075188	-0.251908	-0.0851487	0.257422	-0.175764	-0.283423	-0.187371	0.296347
99099_6w_G1_D.tif	0.344462	-0.00713087	-0.281237	-0.155651	-0.277908	0.165605	0.237009	-0.11669	0.237914	0.114898	0.127866	-0.169385	0.130417	0.16703	0.0193235	-0.207718	0.0223824	0.2039	-0.0892445	-0.239741	-0.0840064	0.241025	-0.196779	-0.276251	-0.190199	0.280107
99103_6w_G1_D.tif	0.372959	-0.00265922	-0.297761	-0.17859	-0.291946	0.166512	0.253519	-0.0986809	0.260412	0.104436	0.134616	-0.150248	0.143906	0.149855	0.0150813	-0.183767	0.0266942	0.184019	-0.102716	-0.218444	-0.0893048	0.219841	-0.220817	-0.251228	-0.204644	0.258954
99114_6w_G1_D.tif	0.375269	-0.00144473	-0.305632	-0.163126	-0.298223	0.143258	0.254883	-0.0975163	0.261321	0.100654	0.135082	-0.148698	0.146142	0.152902	0.0159145	-0.185727	0.0292575	0.188244	-0.102706	-0.218804	-0.0875431	0.220077	-0.221288	-0.251882	-0.202477	0.262064
99115_6w_G1_D.tif	0.341503	-0.000467516	-0.280357	-0.18709	-0.269866	0.156049	0.227916	-0.105944	0.244382	0.126782	0.117602	-0.160588	0.138647	0.173659	0.0108894	-0.209054	0.0313107	0.205609	-0.0981012	-0.24364	-0.0745601	0.240996	-0.208663	-0.273645	-0.180704	0.277333
99132_6w_G1_D.tif	0.374603	0.00718217	-0.297485	-0.198417	-0.282561	0.184181	0.252283	-0.0861875	0.261276	0.0997942	0.13063	-0.137977	0.145843	0.14541	0.0116876	-0.18417	0.0295925	0.180958	-0.108644	-0.221531	-0.0864587	0.215327	-0.228971	-0.257525	-0.201793	0.252954
99134_6w_G1_D.tif	0.347143	-0.0176715	-0.277961	-0.137728	-0.285668	0.180192	0.243609	-0.123262	0.234652	0.10406	0.135843	-0.173389	0.126119	0.163248	0.0277255	-0.209217	0.0155894	0.201843	-0.0807391	-0.239368	-0.0935704	0.239624	-0.189762	-0.26701	-0.202982	0.27868
99149_6w_G1_D.tif	0.335815	-0.0124022	-0.2738	-0.169115	-0.272055	0.164526	0.226357	-0.113326	0.237597	0.123768	0.120885	-0.170223	0.130723	0.170532	0.0152476	-0.208743	0.026266	0.213063	-0.0888972	-0.247279	-0.0788394	0.248526	-0.1945	-0.281589	-0.184799	0.282261
99168_6w_G1_D.tif	0.33886	-0.012943	-0.27673	-0.162543	-0.277662	0.157299	0.230872	-0.114644	0.235939	0.114179	0.125048	-0.17188	0.131062	0.171975	0.0185551	-0.209636	0.0251586	0.213485	-0.0880542	-0.241281	-0.0816876	0.246643	-0.19412	-0.276474	-0.18724	0.28582
99180_6w_G1_D.tif	0.334231	-0.0149842	-0.266892	-0.153586	-0.269628	0.194788	0.23274	-0.126482	0.229926	0.119124	0.127966	-0.177596	0.121751	0.167003	0.0236413	-0.215503	0.0157375	0.206823	-0.0804544	-0.24899	-0.0895898	0.243483	-0.185361	-0.278302	-0.194066	0.284221
99189_6w_G1_D.tif	0.341936	-0.0130342	-0.276652	-0.1551	-0.276301	0.179936	0.235088	-0.114318	0.235898	0.112099	0.128337	-0.169886	0.128769	0.16675	0.0215044	-0.210247	0.0211457	0.206464	-0.0858164	-0.243698	-0.087042	0.239393	-0.193174	-0.277157	-0.193693	0.278798
99190_6w_G1_D.tif	0.335192	-0.0153704	-0.271387	-0.157054	-0.271422	0.182516	0.231517	-0.122464	0.232972	0.119686	0.126697	-0.175989	0.126642	0.17174	0.0210267	-0.211891	0.0210392	0.212273	-0.0845842	-0.244538	-0.085358	0.245009	-0.189757	-0.280321	-0.192579	0.276404
99199_6w_G1_D.tif	0.351928	-0.00535542	-0.286817	-0.156725	-0.280933	0.170886	0.241575	-0.109734	0.243055	0.110558	0.130262	-0.163405	0.132923	0.159761	0.0192674	-0.202791	0.0239103	0.200701	-0.0916914	-0.237434	-0.0854777	0.235409	-0.202733	-0.272099	-0.195268	0.27023
99208_6w_G1_D.tif	0.354376	-0.0146573	-0.287702	-0.17316	-0.286325	0.149477	0.237673	-0.104011	0.25173	0.114571	0.125939	-0.1573	0.141653	0.167592	0.0150354	-0.197978	0.0300609	0.204891	-0.0965189	-0.231397	-0.0822174	0.236174	-0.209097	-0.262607	-0.194607	0.268405
99214_6w_G1_D.tif	0.360653	-0.00178524	-0.293772	-0.182848	-0.286421	0.135691	0.243216	-0.104286	0.253822	0.110328	0.125839	-0.151108	0.142876	0.160474	0.0115111	-0.190736	0.0311677	0.198241	-0.102141	-0.226406	-0.0792191	0.23844	-0.216709	-0.259847	-0.190823	0.273843
99216_6w_G1_D.tif	0.349837	-0.00866927	-0.284202	-0.163384	-0.280772	0.169852	0.241158	-0.113173	0.241455	0.107931	0.130273	-0.164222	0.134728	0.168158	0.0197347	-0.202931	0.0241614	0.203333	-0.0913095	-0.235644	-0.0865497	0.233931	-0.202811	-0.266944	-0.195704	0.271763
99217_6w_G1_D.tif	0.35893	-0.0181882	-0.284029	-0.179789	-0.284443	0.17605	0.240632	-0.100064	0.253906	0.110708	0.127975	-0.152894	0.139698	0.158909	0.0160649	-0.193556	0.0250286	0.194281	-0.0965071	-0.226788	-0.0881373	0.230247	-0.207844	-0.265122	-0.201275	0.266205
99219_6w_G1_D.tif	0.368944	-0.0103573	-0.291608	-0.184196	-0.295499	0.156691	0.251857	-0.10369	0.256094	0.0974064	0.134696	-0.151682	0.141954	0.152244	0.0184776	-0.188288	0.0256935	0.190651	-0.0987632	-0.216039	-0.0899814	0.229426	-0.216439	-0.242515	-0.205426	0.270348
99220_6w_G1_D.tif	0.309377	-0.0216795	-0.251238	-0.180061	-0.258285	0.172376	0.209179	-0.127871	0.2205	0.130958	0.112339	-0.18245	0.122307	0.187452	0.0166085	-0.224165	0.0239992	0.229871	-0.0788169	-0.262208	-0.0740167	0.268658	-0.177299	-0.292199	-0.174655	0.301318
99221_6w_G1_D.tif	0.336524	-0.0104573	-0.27028	-0.16198	-0.269999	0.19208	0.234983	-0.123136	0.230535	0.114402	0.129703	-0.177398	0.124362	0.166933	0.0233382	-0.213897	0.0185705	0.208168	-0.0838293	-0.243563	-0.0881483	0.242655	-0.191038	-0.27324	-0.19472	0.279434
99225_6w_G1_D.tif	0.359761	-0.0171316	-0.285683	-0.173454	-0.290483	0.16155	0.245207	-0.109665	0.250786	0.105702	0.131587	-0.157372	0.137257	0.156614	0.0185443	-0.191977	0.0247135	0.19993	-0.0938856	-0.224123	-0.0891102	0.234302	-0.206509	-0.25632	-0.202185	0.271944
99226_6w_G1_D.tif	0.375654	-0.0147864	-0.302712	-0.135909	-0.305096	0.152864	0.257952	-0.104951	0.259912	0.102035	0.140503	-0.156117	0.142042	0.152869	0.0226048	-0.189394	0.0230083	0.186838	-0.0949432	-0.21874	-0.0952636	0.21855	-0.211823	-0.251778	-0.21184	0.25852
99231_6w_G1_D.tif	0.331822	-0.0241624	-0.263454	-0.155719	-0.271652	0.197423	0.231817	-0.126439	0.227673	0.112286	0.129974	-0.18044	0.122267	0.170747	0.0261894	-0.21472	0.0160397	0.212945	-0.0780823	-0.244934	-0.0911591	0.24766	-0.182358	-0.276429	-0.199077	0.281783
99241_6w_G1_D.tif	0.363575	-0.0119653	-0.290593	-0.165009	-0.292454	0.158938	0.250085	-0.113012	0.251384	0.105056	0.133892	-0.156477	0.137221	0.15528	0.0194726	-0.191583	0.0234134	0.195101	-0.0945527	-0.222649	-0.0901646	0.230882	-0.208319	-0.254965	-0.202961	0.270404
99245_6w_G1_D.tif	0.358405	-0.0114052	-0.280222	-0.197405	-0.27956	0.179811	0.242831	-0.104082	0.249716	0.104104	0.127825	-0.151261	0.137315	0.155342	0.0146173	-0.190059	0.0254438	0.197762	-0.0990439	-0.223093	-0.0873169	0.23307	-0.210689	-0.26299	-0.199322	0.270207
99256_6w_G1_D.tif	0.331322	-0.0270193	-0.260644	-0.153391	-0.272486	0.202412	0.232009	-0.125127	0.223846	0.105147	0.130582	-0.177768	0.118174	0.165306	0.0286791	-0.216913	0.0134394	0.212928	-0.0744505	-0.247833	-0.0930381	0.250793	-0.177831	-0.278377	-0.199603	0.289843
99258_6w_G1_D.tif	0.358399	-0.00154274	-0.289795	-0.178323	-0.283278	0.16536	0.245161	-0.105489	0.249196	0.106608	0.129859	-0.154695	0.138906	0.158373	0.0169739	-0.197853	0.0275933	0.197576	-0.0975775	-0.230608	-0.0846413	0.231103	-0.21391	-0.257306	-0.196886	0.266796
99262_6w_G1_D.tif	0.353555	0.00639625	-0.287806	-0.189331	-0.27341	0.173137	0.241192	-0.102431	0.246659	0.110381	0.126737	-0.156121	0.138808	0.160989	0.0127756	-0.196785	0.0296799	0.198911	-0.100959	-0.234514	-0.0800058	0.232642	-0.216391	-0.267072	-0.190835	0.263797
99268_6w_G1_D.tif	0.362526	-0.000617005	-0.293582	-0.173119	-0.284751	0.172216	0.248528	-0.101246	0.250284	0.101744	0.133429	-0.155417	0.139022	0.15478	0.0174059	-0.192436	0.0260637	0.192192	-0.0981409	-0.227949	-0.0859972	0.229908	-0.214501	-0.260905	-0.200287	0.260849
99284_6w_G1_D.tif	0.35236	-0.00304056	-0.29182	-0.139815	-0.286023	0.147508	0.242695	-0.114039	0.242605	0.110877	0.130517	-0.164771	0.133395	0.162259	0.0199083	-0.205404	0.024987	0.203793	-0.0908919	-0.239035	-0.0833152	0.239879	-0.201922	-0.272719	-0.192496	0.274508
99288_6w_G1_D.tif	0.338151	-0.00807813	-0.277303	-0.155943	-0.271945	0.174794	0.231825	-0.113762	0.232746	0.113316	0.124545	-0.166427	0.127093	0.166066	0.0193717	-0.21176	0.0236094	0.211846	-0.0862329	-0.250383	-0.0818684	0.24528	-0.19279	-0.285831	-0.187202	0.280882
99322_6w_G1_D.tif	0.368576	-0.00806172	-0.292494	-0.160552	-0.293681	0.174655	0.256142	-0.11135	0.251135	0.0981472	0.139584	-0.159237	0.135343	0.148029	0.0223636	-0.189706	0.0203219	0.189346	-0.0936816	-0.219863	-0.095665	0.222679	-0.209131	-0.251339	-0.208812	0.26725
99325_6w_G1_D.tif	0.366214	-0.00820955	-0.292343	-0.175573	-0.290152	0.160059	0.247019	-0.0998277	0.25563	0.105722	0.129948	-0.148597	0.139636	0.149112	0.015157	-0.188301	0.0255282	0.188648	-0.0985424	-0.225304	-0.0864286	0.231706	-0.21245	-0.26117	-0.199216	0.271734
99326_6w_G1_D.tif	0.34077	-0.0110265	-0.276373	-0.154101	-0.271291	0.190612	0.235256	-0.114383	0.234152	0.112964	0.128892	-0.171155	0.12737	0.167078	0.0215582	-0.210418	0.0199198	0.205154	-0.0864448	-0.243389	-0.0867939	0.239734	-0.19273	-0.284014	-0.194285	0.272945
99329_6w_G1_D.tif	0.330983	-0.0136441	-0.261263	-0.180534	-0.262065	0.200071	0.230252	-0.124757	0.226945	0.114657	0.1252	-0.174394	0.121963	0.168489	0.0208925	-0.212757	0.0178191	0.21141	-0.0843075	-0.243996	-0.0870212	0.247727	-0.188332	-0.279155	-0.191066	0.286883
99331_6w_G1_D.tif	0.341475	-0.00445254	-0.283799	-0.16079	-0.275786	0.154805	0.233468	-0.113977	0.238867	0.118368	0.125235	-0.169503	0.134222	0.173486	0.0171536	-0.210083	0.0282361	0.212365	-0.0921753	-0.241669	-0.0785553	0.244085	-0.201565	-0.275131	-0.186776	0.272497
99332_6w_G1_D.tif	0.343041	-0.0177988	-0.283404	-0.132619	-0.287691	0.139355	0.23644	-0.120473	0.237267	0.111728	0.129081	-0.171105	0.131964	0.174923	0.0228388	-0.212808	0.0245387	0.21564	-0.0848745	-0.24266	-0.0830122	0.250287	-0.193278	-0.272642	-0.192911	0.278173
99333_6w_G1_D.tif	0.336467	-0.0123017	-0.265903	-0.187038	-0.264808	0.194045	0.232305	-0.120043	0.23267	0.114072	0.124614	-0.168176	0.12696	0.168329	0.0181131	-0.206636	0.0206719	0.208546	-0.0886618	-0.240511	-0.0855872	0.244501	-0.195038	-0.275825	-0.191805	0.281035
99337_6w_G1_D.tif	0.359722	-0.0077587	-0.289786	-0.159768	-0.285965	0.177444	0.249728	-0.111023	0.245553	0.101042	0.135866	-0.160169	0.133932	0.155079	0.0217219	-0.195626	0.0222366	0.196954	-0.0925978	-0.227681	-0.0900541	0.23206	-0.206325	-0.263019	-0.204032	0.262466
99345_6w_G1_D.tif	0.354871	-0.0102607	-0.287161	-0.15717	-0.286334	0.166782	0.244681	-0.109885	0.242367	0.100246	0.132544	-0.159723	0.132906	0.158262	0.0217914	-0.201211	0.0229986	0.201923	-0.0902971	-0.232633	-0.087866	0.237072	-0.201831	-0.267262	-0.19867	0.27386
99360_6w_G1_D.tif	0.380167	-0.00254541	-0.305617	-0.174286	-0.299087	0.150979	0.256186	-0.0911353	0.265767	0.0996231	0.135368	-0.14442	0.14741	0.145068	0.0141198	-0.178992	0.0289328	0.181384	-0.105604	-0.213415	-0.0880699	0.220234	-0.224392	-0.251283	-0.205181	0.25879
99366_6w_G1_D.tif	0.342985	-0.00985689	-0.280235	-0.152674	-0.277099	0.167437	0.234974	-0.114821	0.236912	0.114461	0.126269	-0.166084	0.128278	0.162608	0.0193977	-0.208298	0.0234738	0.209632	-0.0877664	-0.24369	-0.0828525	0.244946	-0.194405	-0.282403	-0.189931	0.278742
99395_6w_G1_D.tif	0.339804	-0.0111151	-0.275243	-0.15732	-0.275195	0.171506	0.234414	-0.122461	0.235031	0.118317	0.126137	-0.170176	0.126576	0.165275	0.0196928	-0.208473	0.0211555	0.208333	-0.0857278	-0.245028	-0.0842	0.245853	-0.192273	-0.277368	-0.190172	0.282656
99398_6w_G1_D.tif	0.351752	-0.0159557	-0.288612	-0.129749	-0.293147	0.131057	0.241285	-0.115795	0.242134	0.10728	0.130648	-0.164797	0.132129	0.162219	0.0219617	-0.205832	0.0242403	0.21118	-0.0871514	-0.237259	-0.0850501	0.246679	-0.19589	-0.27311	-0.194299	0.284083
99400_6w_G1_D.tif	0.371711	-0.00686721	-0.296245	-0.178544	-0.292435	0.170588	0.251712	-0.0940471	0.259111	0.0994479	0.13467	-0.148551	0.143154	0.148016	0.0172621	-0.18746	0.0273235	0.188705	-0.100813	-0.219813	-0.0897665	0.222243	-0.219081	-0.251561	-0.206604	0.257842
99405_6w_G1_D.tif	0.362812	-0.000561642	-0.288971	-0.183714	-0.281824	0.184738	0.249772	-0.103437	0.251207	0.104381	0.135491	-0.160429	0.138839	0.154234	0.0178511	-0.192761	0.0249107	0.190969	-0.100049	-0.221134	-0.0895824	0.223827	-0.216503	-0.254318	-0.203952	0.258206
99408_6w_G1_D.tif	0.367649	-0.00196677	-0.294488	-0.181172	-0.289043	0.170247	0.251485	-0.098238	0.253992	0.0969422	0.134872	-0.151482	0.141311	0.151072	0.0183597	-0.191741	0.0270605	0.191462	-0.100398	-0.220409	-0.0882391	0.226006	-0.218636	-0.251373	-0.203925	0.260652
99414_6w_G1_D.tif	0.357344	-0.0133177	-0.290458	-0.160076	-0.287882	0.163413	0.240279	-0.0955249	0.250612	0.106609	0.130206	-0.159018	0.138826	0.158032	0.0179966	-0.198038	0.0280203	0.202231	-0.094137	-0.233473	-0.0853788	0.233023	-0.206621	-0.268991	-0.198807	0.265132
99420_6w_G1_D.tif	0.336673	-0.00596867	-0.277324	-0.173675	-0.269273	0.17182	0.229089	-0.110962	0.23705	0.119412	0.123066	-0.169284	0.13423	0.176207	0.0167841	-0.212817	0.028711	0.213939	-0.0915953	-0.24583	-0.0791414	0.241255	-0.201368	-0.275468	-0.1869	0.271372
99442_6w_G1_D.tif	0.338665	-0.0163082	-0.273645	-0.134904	-0.275988	0.188764	0.237171	-0.123391	0.228697	0.108498	0.13161	-0.174259	0.122524	0.166566	0.0263474	-0.214274	0.0168974	0.210427	-0.0794729	-0.248242	-0.0905209	0.242446	-0.185107	-0.283711	-0.197177	0.278389
99457_6w_G1_D.tif	0.378296	-0.00910496	-0.300492	-0.170798	-0.299311	0.164812	0.25988	-0.103236	0.260988	0.0958463	0.13864	-0.145497	0.142791	0.145248	0.0185979	-0.178751	0.0244191	0.183836	-0.0997616	-0.214831	-0.0931193	0.22163	-0.219361	-0.245726	-0.211566	0.256573
99479_6w_G1_D.tif	0.328098	0.0027366	-0.273059	-0.153261	-0.265062	0.17313	0.230365	-0.126515	0.222001	0.116664	0.125159	-0.1794	0.120779	0.170147	0.0209206	-0.219172	0.0202063	0.212186	-0.0823493	-0.257081	-0.0786124	0.255316	-0.188108	-0.286011	-0.180339	0.291261
99493_6w_G1_D.tif	0.325803	-0.00306705	-0.27213	-0.166145	-0.260519	0.171038	0.22121	-0.11661	0.229579	0.129629	0.116872	-0.172136	0.127589	0.177709	0.0152858	-0.220656	0.026927	0.21725	-0.0880644	-0.257845	-0.0734857	0.252825	-0.192382	-0.293099	-0.176685	0.281108
99497_6w_G1_D.tif	0.324549	-0.00516365	-0.270128	-0.127886	-0.26431	0.184886	0.227982	-0.131538	0.222246	0.127067	0.126721	-0.189984	0.120328	0.178818	0.0236846	-0.225853	0.0193957	0.218547	-0.0789529	-0.260192	-0.0832167	0.24716	-0.182099	-0.293208	-0.186199	0.277347
99505_6w_G1_D.tif	0.333792	-0.0167992	-0.273864	-0.155751	-0.276027	0.159527	0.227758	-0.117431	0.232649	0.116145	0.123437	-0.171999	0.128563	0.17318	0.0195091	-0.21243	0.0253142	0.219499	-0.0842579	-0.249312	-0.0802781	0.252555	-0.189756	-0.281333	-0.186839	0.284151
99506_6w_G1_D.tif	0.337337	0.00797669	-0.276228	-0.183441	-0.262286	0.180674	0.231372	-0.112315	0.23544	0.122877	0.122187	-0.168542	0.130186	0.166376	0.0144407	-0.212329	0.0260591	0.204371	-0.0941102	-0.24781	-0.0778983	0.240592	-0.204469	-0.277012	-0.182031	0.278584
99509_6w_G1_D.tif	0.340787	-0.00927037	-0.273158	-0.189677	-0.270676	0.175059	0.230211	-0.108676	0.239909	0.115472	0.122572	-0.164699	0.134071	0.169277	0.0143639	-0.20347	0.0262705	0.206505	-0.0930442	-0.24056	-0.0806781	0.243602	-0.20217	-0.272612	-0.188458	0.27905
99517_6w_G1_D.tif	0.369308	-0.0139157	-0.289977	-0.183163	-0.29383	0.172179	0.251895	-0.102284	0.257865	0.101047	0.136729	-0.155982	0.142065	0.152211	0.0190164	-0.18663	0.0241474	0.187847	-0.098559	-0.214247	-0.0926351	0.225549	-0.215779	-0.243658	-0.210246	0.261046
99518_6w_G1_D.tif	0.341264	-0.00179186	-0.279073	-0.190127	-0.269334	0.160338	0.229841	-0.106344	0.239742	0.114878	0.119352	-0.15879	0.135978	0.171266	0.0120275	-0.205193	0.0304061	0.210565	-0.0970842	-0.240855	-0.0754849	0.244921	-0.206006	-0.278213	-0.181629	0.279345
99524_6w_G1_D.tif	0.355965	-0.0086349	-0.283084	-0.182564	-0.280764	0.175633	0.243451	-0.108282	0.246422	0.105042	0.129147	-0.155044	0.135479	0.157177	0.0168957	-0.194547	0.0249819	0.199944	-0.0952319	-0.230014	-0.0872747	0.232713	-0.208018	-0.263007	-0.197968	0.271584
99529_6w_G1_D.tif	0.344911	-0.0121783	-0.276779	-0.157114	-0.279229	0.178309	0.240115	-0.123496	0.237603	0.114431	0.131622	-0.173734	0.128297	0.164687	0.0228441	-0.208157	0.0196711	0.204702	-0.0862916	-0.236314	-0.0896354	0.238087	-0.195195	-0.26563	-0.197933	0.276407
99538_6w_G1_D.tif	0.332166	-0.0151686	-0.262432	-0.210694	-0.263738	0.165169	0.218673	-0.112047	0.241843	0.130627	0.112195	-0.164555	0.137105	0.180916	0.00706012	-0.20383	0.0307017	0.215652	-0.0969664	-0.240906	-0.0752326	0.248454	-0.201326	-0.278094	-0.180047	0.284476
99544_6w_G1_D.tif	0.336423	-0.00585954	-0.273292	-0.178841	-0.268969	0.173082	0.229553	-0.112586	0.233886	0.114612	0.124042	-0.172316	0.130244	0.170718	0.0166657	-0.209728	0.0258335	0.213133	-0.0909654	-0.2414	-0.0808591	0.243921	-0.197279	-0.278209	-0.185282	0.283475
99559_6w_G1_D.tif	0.368761	-0.00927666	-0.293274	-0.175713	-0.292741	0.163397	0.250947	-0.101482	0.255654	0.100293	0.133466	-0.149366	0.140267	0.149959	0.017922	-0.189102	0.0247597	0.18872	-0.0985869	-0.219403	-0.0894646	0.228299	-0.213915	-0.254231	-0.203795	0.267905
99562_6w_G1_D.tif	0.33448	-0.0117551	-0.269697	-0.174694	-0.268116	0.173771	0.22862	-0.122514	0.234761	0.124492	0.1207	-0.168753	0.128225	0.172169	0.0159633	-0.20951	0.0233396	0.211692	-0.0884141	-0.245549	-0.0813049	0.246555	-0.193264	-0.280177	-0.185293	0.284273
99573_6w_G1_D.tif	0.369787	-0.0133682	-0.291043	-0.175183	-0.290286	0.179689	0.25275	-0.104735	0.256533	0.102896	0.13452	-0.148116	0.138901	0.14883	0.0185689	-0.186456	0.0222529	0.186518	-0.0976811	-0.218946	-0.0930124	0.22411	-0.212714	-0.255787	-0.208577	0.260547
99574_6w_G1_D.tif	0.314253	-0.0090007	-0.260515	-0.123567	-0.262473	0.180709	0.221785	-0.137288	0.211429	0.123553	0.123686	-0.192395	0.112797	0.180045	0.0268965	-0.237898	0.0159193	0.224732	-0.0720128	-0.267176	-0.0817133	0.260374	-0.170419	-0.30005	-0.179634	0.297963
99584_6w_G1_D.tif	0.319345	-0.0128135	-0.263388	-0.145999	-0.264059	0.170745	0.222776	-0.13562	0.218756	0.124408	0.121416	-0.185536	0.120015	0.185451	0.0210272	-0.222691	0.018783	0.221737	-0.0786371	-0.256545	-0.0807255	0.25587	-0.177043	-0.296355	-0.178267	0.297348
99589_6w_G1_D.tif	0.362928	-0.00570518	-0.294171	-0.154699	-0.287484	0.17246	0.251617	-0.111051	0.248387	0.103013	0.136067	-0.159056	0.136318	0.157305	0.0203596	-0.193187	0.0234133	0.196039	-0.0950866	-0.225022	-0.0903198	0.226008	-0.208653	-0.265256	-0.203373	0.259151
99590_6w_G1_D.tif	0.342901	-0.00717409	-0.27823	-0.155636	-0.277749	0.168511	0.238511	-0.123845	0.235357	0.115437	0.129431	-0.172906	0.127322	0.1651	0.0213544	-0.209495	0.019915	0.203673	-0.0870037	-0.23882	-0.0853624	0.244418	-0.194585	-0.271622	-0.19186	0.282359
99596_6w_G1_D.tif	0.366994	-0.0219542	-0.293532	-0.136171	-0.304929	0.152329	0.253455	-0.10763	0.250634	0.0933366	0.140662	-0.162469	0.135464	0.150721	0.0261498	-0.193141	0.0204235	0.195736	-0.0875656	-0.223818	-0.0949315	0.234427	-0.20179	-0.253293	-0.211034	0.271925
99598_6w_G1_D.tif	0.375292	-0.00452242	-0.307148	-0.151802	-0.299686	0.15146	0.254228	-0.0912123	0.261973	0.100532	0.137376	-0.153013	0.146643	0.153318	0.0180428	-0.188547	0.0292316	0.188565	-0.100874	-0.22173	-0.0887207	0.218385	-0.220175	-0.253908	-0.206182	0.252474
99605_6w_G1_D.tif	0.346156	-0.00341388	-0.284366	-0.168038	-0.276195	0.158451	0.236229	-0.112241	0.241029	0.115212	0.124972	-0.163193	0.134302	0.168136	0.015042	-0.202238	0.0264912	0.204713	-0.0939021	-0.239369	-0.0798275	0.241701	-0.203016	-0.276546	-0.186915	0.276825
99609_6w_G1_D.tif	0.374949	-0.00787865	-0.300849	-0.172886	-0.299852	0.141963	0.255422	-0.101338	0.259528	0.0946242	0.134895	-0.145226	0.144441	0.151502	0.0168632	-0.182886	0.0271458	0.188412	-0.101134	-0.214558	-0.0887533	0.227191	-0.218652	-0.248385	-0.204003	0.269466
99611_6w_G1_D.tif	0.317526	-0.0084666	-0.26546	-0.181093	-0.258372	0.149944	0.211855	-0.119012	0.227504	0.134296	0.110186	-0.175536	0.129672	0.189457	0.0100621	-0.218243	0.0304469	0.226811	-0.0887614	-0.259069	-0.0680095	0.261794	-0.189376	-0.295997	-0.167273	0.295116
99613_6w_G1_D.tif	0.326173	-0.00684478	-0.267643	-0.17724	-0.262072	0.172891	0.221759	-0.116456	0.227958	0.121821	0.118301	-0.173156	0.126536	0.175493	0.0159757	-0.217144	0.0256096	0.218157	-0.087504	-0.25218	-0.0757693	0.254759	-0.190923	-0.288746	-0.1784	0.288645
99614_6w_G1_D.tif	0.372264	-0.00194669	-0.301063	-0.172225	-0.292937	0.160889	0.252838	-0.0956566	0.25935	0.101079	0.134595	-0.149188	0.144793	0.152226	0.0159539	-0.186419	0.028412	0.187468	-0.102324	-0.220718	-0.0874176	0.221957	-0.220916	-0.253986	-0.203547	0.256521
99640_6w_G1_D.tif	0.355956	0.00166553	-0.293646	-0.145925	-0.280304	0.174692	0.243496	-0.102311	0.245227	0.110469	0.130851	-0.159945	0.1335	0.15436	0.0182813	-0.201629	0.0246373	0.195843	-0.0935135	-0.241612	-0.0842528	0.231526	-0.205562	-0.280437	-0.194669	0.263305
99656_6w_G1_D.tif	0.308382	-0.00725482	-0.253811	-0.198228	-0.247304	0.170472	0.20722	-0.125381	0.222896	0.140877	0.10748	-0.180538	0.126679	0.192777	0.00912453	-0.222345	0.0300828	0.231853	-0.088283	-0.261979	-0.0680915	0.26222	-0.188119	-0.296321	-0.166255	0.293849
99659_6w_G1_D.tif	0.349333	-0.0103264	-0.281415	-0.178164	-0.275737	0.175908	0.236345	-0.105387	0.244682	0.112106	0.125304	-0.157667	0.136246	0.16601	0.0158212	-0.201074	0.0260313	0.202235	-0.09507	-0.235017	-0.0836968	0.235508	-0.204672	-0.274235	-0.19317	0.270102
99674_6w_G1_D.tif	0.332676	-0.0066212	-0.275085	-0.164004	-0.266607	0.172938	0.224277	-0.108783	0.234251	0.123356	0.120212	-0.170864	0.129936	0.172847	0.0161682	-0.216255	0.026776	0.21362	-0.0890197	-0.252213	-0.0773978	0.246335	-0.19415	-0.289546	-0.182036	0.279191
99691_6w_G1_D.tif	0.341792	0.00130591	-0.27962	-0.16464	-0.270392	0.175735	0.236229	-0.116222	0.234409	0.115109	0.125835	-0.166547	0.127563	0.162891	0.0180536	-0.209364	0.0218767	0.20173	-0.0898564	-0.245417	-0.0815344	0.243354	-0.198077	-0.279855	-0.186278	0.281919
99697_6w_G1_D.tif	0.344745	-0.000670136	-0.276897	-0.189598	-0.270078	0.175879	0.236826	-0.114005	0.239868	0.114634	0.124965	-0.163631	0.133217	0.165458	0.0145233	-0.202248	0.0264368	0.20612	-0.0955968	-0.236947	-0.0824451	0.236479	-0.206706	-0.268136	-0.188858	0.276665
99698_6w_G1_D.tif	0.323969	-0.0123334	-0.266435	-0.146025	-0.267726	0.163317	0.22353	-0.134544	0.226999	0.135371	0.119936	-0.181062	0.12081	0.174571	0.0201874	-0.224889	0.0213548	0.220674	-0.081067	-0.254864	-0.0787395	0.258001	-0.181917	-0.288294	-0.180901	0.290077
99699_6w_G1_D.tif	0.34368	-0.00685886	-0.281259	-0.151682	-0.278083	0.166156	0.23677	-0.119612	0.239817	0.12262	0.128608	-0.174653	0.130743	0.167444	0.0195695	-0.209301	0.0227148	0.203857	-0.0889167	-0.24078	-0.0838051	0.241074	-0.19768	-0.271929	-0.192157	0.273662
99704_6w_G1_D.tif	0.345801	-0.0130473	-0.276955	-0.15956	-0.279324	0.181922	0.243214	-0.127463	0.236248	0.109999	0.13335	-0.171341	0.128338	0.165979	0.0242163	-0.206271	0.019083	0.205297	-0.0857899	-0.234804	-0.0907328	0.238708	-0.196375	-0.261703	-0.201073	0.272283
99714_6w_G1_D.tif	0.337572	-0.0134372	-0.270191	-0.190155	-0.267918	0.172726	0.228774	-0.119733	0.241559	0.12882	0.118603	-0.162301	0.13435	0.175826	0.0142813	-0.209488	0.0266654	0.209988	-0.0942275	-0.238113	-0.079685	0.24469	-0.201629	-0.271952	-0.188154	0.273129
99715_6w_G1_D.tif	0.322072	-0.00511056	-0.261737	-0.168907	-0.255882	0.196863	0.228437	-0.133298	0.216679	0.116172	0.123948	-0.179611	0.119266	0.17964	0.0223931	-0.222691	0.0177517	0.217316	-0.0811748	-0.25436	-0.0845927	0.247718	-0.184513	-0.285966	-0.182647	0.292235
99721_6w_G1_D.tif	0.330051	-0.00937145	-0.267725	-0.164342	-0.26872	0.179533	0.231489	-0.126635	0.223031	0.109419	0.127567	-0.179609	0.121808	0.171318	0.0226698	-0.214509	0.0191933	0.215313	-0.0819806	-0.246288	-0.0837534	0.253298	-0.186473	-0.279553	-0.187158	0.291427
99725_6w_G1_D.tif	0.340537	-0.00152643	-0.282149	-0.154033	-0.272038	0.1637	0.233907	-0.118913	0.237124	0.124249	0.124249	-0.169522	0.13077	0.17197	0.0169492	-0.211913	0.0242887	0.205582	-0.0911593	-0.244453	-0.0800474	0.241005	-0.197807	-0.283055	-0.184623	0.276908
99727_6w_G1_D.tif	0.365962	-0.00960005	-0.299985	-0.145226	-0.296194	0.148721	0.24989	-0.101184	0.253352	0.100812	0.135476	-0.157638	0.141108	0.158753	0.0195189	-0.191911	0.026631	0.195921	-0.0953594	-0.22752	-0.0872639	0.230555	-0.210632	-0.26293	-0.202503	0.261247
99733_6w_G1_D.tif	0.339395	-0.0153284	-0.283161	-0.142799	-0.280862	0.131029	0.227331	-0.113694	0.242778	0.131361	0.121041	-0.172528	0.136159	0.180079	0.0148867	-0.21154	0.0295748	0.216043	-0.0902976	-0.247515	-0.077306	0.245017	-0.196481	-0.280882	-0.183057	0.280759
99743_6w_G1_D.tif	0.344586	-0.00812014	-0.282	-0.157319	-0.278472	0.166001	0.234694	-0.106076	0.236693	0.105565	0.126282	-0.162343	0.130515	0.163062	0.0193081	-0.207913	0.0242157	0.206729	-0.0880686	-0.245976	-0.0827073	0.242894	-0.196353	-0.280674	-0.188693	0.284172
99755_6w_G1_D.tif	0.322938	-0.0121523	-0.263495	-0.176474	-0.256739	0.190038	0.219324	-0.117724	0.228233	0.126901	0.117476	-0.174095	0.126418	0.179373	0.0159647	-0.217384	0.0251789	0.220305	-0.0860355	-0.255942	-0.0781219	0.250626	-0.188847	-0.293106	-0.182294	0.279633
99760_6w_G1_D.tif	0.344633	-0.000323581	-0.283581	-0.166188	-0.273428	0.16845	0.235504	-0.112398	0.24228	0.123366	0.126004	-0.169302	0.134898	0.170115	0.0161839	-0.208714	0.0261188	0.201552	-0.0942752	-0.24045	-0.080853	0.236224	-0.20482	-0.27221	-0.188666	0.269879
99769_6w_G1_D.tif	0.364924	-0.00388989	-0.29714	-0.16031	-0.290845	0.151964	0.251004	-0.111734	0.25312	0.108317	0.133406	-0.156626	0.140104	0.158567	0.0167868	-0.189624	0.0267624	0.196288	-0.0981546	-0.224333	-0.0869856	0.227105	-0.213228	-0.258811	-0.199754	0.263087
99775_6w_G1_D.tif	0.374872	-0.00917761	-0.302378	-0.153777	-0.299679	0.161042	0.257135	-0.101562	0.259267	0.0988661	0.138792	-0.151345	0.143487	0.153191	0.0204227	-0.187286	0.0250032	0.18652	-0.0976471	-0.220349	-0.0929553	0.218102	-0.216475	-0.249863	-0.209844	0.255639
99778_6w_G1_D.tif	0.330143	-0.00781613	-0.27386	-0.151582	-0.269626	0.166819	0.230001	-0.126364	0.226249	0.117009	0.125354	-0.178597	0.125896	0.179518	0.0202919	-0.214491	0.0218215	0.214988	-0.0839026	-0.250173	-0.0797765	0.253034	-0.188506	-0.285952	-0.184087	0.283607
90001_6w_G2_D.tif	0.304966	-0.00343312	-0.252531	-0.176966	-0.243633	0.196443	0.210709	-0.126396	0.210625	0.128808	0.114553	-0.18781	0.11534	0.182831	0.0177747	-0.23116	0.0220076	0.228615	-0.0787963	-0.270786	-0.0735415	0.264024	-0.177669	-0.303864	-0.169805	0.299694
90003_6w_G2_D.tif	0.328661	-0.00658439	-0.26671	-0.194271	-0.2597	0.173799	0.220786	-0.113333	0.233744	0.125961	0.115411	-0.168531	0.131654	0.178213	0.0113094	-0.211383	0.0293533	0.21874	-0.0931521	-0.248379	-0.0751846	0.248176	-0.19789	-0.285463	-0.178283	0.283056
90006_6w_G2_D.tif	0.327811	-0.0159253	-0.271984	-0.174834	-0.269016	0.150095	0.218627	-0.113526	0.235971	0.12879	0.116003	-0.172218	0.135395	0.187862	0.0131228	-0.213857	0.0311098	0.222417	-0.0901966	-0.249906	-0.0729278	0.254057	-0.195046	-0.283515	-0.17887	0.280559
90008_6w_G2_D.tif	0.325637	-0.0125269	-0.263439	-0.161053	-0.257584	0.203465	0.225308	-0.122443	0.224381	0.120881	0.122569	-0.175785	0.121191	0.174357	0.0208361	-0.219338	0.0186828	0.214673	-0.0815166	-0.256697	-0.0850981	0.245789	-0.183797	-0.294038	-0.187172	0.282716
90011_6w_G2_D.tif	0.345142	-0.00538998	-0.288246	-0.142629	-0.277808	0.159075	0.235523	-0.110359	0.240465	0.117763	0.126013	-0.164591	0.133669	0.169723	0.017915	-0.209553	0.0272884	0.20961	-0.0911955	-0.245808	-0.0798071	0.240735	-0.200115	-0.284994	-0.188844	0.266418
90012_6w_G2_D.tif	0.324444	-0.010464	-0.27372	-0.145517	-0.269603	0.147748	0.219972	-0.119181	0.229844	0.131075	0.119277	-0.182629	0.12937	0.185909	0.0179506	-0.225775	0.02786	0.224045	-0.085204	-0.255726	-0.074163	0.255534	-0.188311	-0.289067	-0.177715	0.284048
90016_6w_G2_D.tif	0.297488	-0.0152963	-0.254239	-0.146936	-0.25461	0.13935	0.202847	-0.144058	0.21345	0.151324	0.107379	-0.19418	0.119878	0.204993	0.0158666	-0.239749	0.0260981	0.241668	-0.076196	-0.275219	-0.0668681	0.274678	-0.170538	-0.304465	-0.160555	0.30789
90020_6w_G2_D.tif	0.312246	-0.0152655	-0.255707	-0.144321	-0.260531	0.182741	0.219988	-0.143273	0.214658	0.130032	0.121745	-0.193282	0.115331	0.184876	0.023741	-0.228625	0.0163597	0.224825	-0.0731627	-0.263694	-0.0818994	0.26083	-0.171911	-0.291919	-0.180857	0.297076
90021_6w_G2_D.tif	0.319207	-0.00582915	-0.268206	-0.161066	-0.255492	0.174542	0.215166	-0.117768	0.227033	0.136387	0.113556	-0.176157	0.12682	0.185627	0.0137099	-0.22349	0.0267276	0.220672	-0.0864952	-0.263876	-0.0726331	0.251944	-0.186972	-0.304336	-0.172421	0.283351
90025_6w_G2_D.tif	0.316863	-0.00372408	-0.266394	-0.159289	-0.255984	0.175235	0.216255	-0.120837	0.222061	0.13119	0.116565	-0.182668	0.123212	0.182653	0.016306	-0.225245	0.0255239	0.223961	-0.0834986	-0.264461	-0.0734367	0.255906	-0.18446	-0.300762	-0.173013	0.288043
90027_6w_G2_D.tif	0.309658	-0.004715	-0.261829	-0.154991	-0.253989	0.171466	0.212671	-0.127896	0.217251	0.135978	0.116074	-0.191887	0.120478	0.18813	0.0177871	-0.232048	0.0247409	0.229553	-0.0809256	-0.265385	-0.0724249	0.261074	-0.17925	-0.302079	-0.170242	0.292798
90047_6w_G2_D.tif	0.35712	-0.00599455	-0.294716	-0.160919	-0.286846	0.139366	0.240286	-0.102928	0.2515	0.113937	0.126405	-0.155721	0.140813	0.163147	0.0140223	-0.196583	0.0300169	0.200868	-0.0976188	-0.234371	-0.0797227	0.238318	-0.210255	-0.269532	-0.191003	0.270411
90065_6w_G2_D.tif	0.347087	0.000457118	-0.288971	-0.15425	-0.276974	0.159477	0.237957	-0.110858	0.240267	0.114022	0.125918	-0.160174	0.133342	0.164891	0.0176194	-0.208533	0.0271448	0.206156	-0.0924794	-0.244813	-0.0793606	0.241238	-0.203603	-0.278218	-0.187946	0.270604
90074_6w_G2_D.tif	0.34396	-0.00889724	-0.283188	-0.141109	-0.281257	0.154919	0.236842	-0.118951	0.237234	0.115441	0.127718	-0.169035	0.129736	0.167608	0.0203364	-0.209675	0.0228538	0.207546	-0.0869483	-0.24426	-0.0831883	0.244244	-0.194426	-0.278889	-0.189674	0.281058
90082_6w_G2_D.tif	0.348078	-0.00687162	-0.281603	-0.172192	-0.27937	0.165433	0.237905	-0.108796	0.240219	0.106835	0.128132	-0.164005	0.132521	0.161818	0.0184912	-0.203656	0.0238205	0.201647	-0.0921506	-0.234265	-0.0829787	0.244023	-0.201445	-0.270718	-0.191618	0.280747
90088_6w_G2_D.tif	0.340715	-0.0179168	-0.273861	-0.17443	-0.275678	0.165121	0.227673	-0.111162	0.243639	0.125022	0.12012	-0.163988	0.134447	0.171373	0.0140858	-0.204425	0.0254312	0.205877	-0.0902818	-0.244432	-0.0815029	0.2427	-0.196924	-0.276034	-0.187864	0.282296
90098_6w_G2_D.tif	0.340062	-0.00388757	-0.284693	-0.143509	-0.275005	0.15837	0.232097	-0.113164	0.237988	0.123317	0.125156	-0.172566	0.131917	0.171796	0.017548	-0.212288	0.0265707	0.210097	-0.0897693	-0.248635	-0.0782552	0.244933	-0.197531	-0.285082	-0.186086	0.270619
90105_6w_G2_D.tif	0.318983	0.000701328	-0.265427	-0.183137	-0.250136	0.182549	0.216525	-0.117479	0.226052	0.133463	0.114166	-0.176654	0.127378	0.184108	0.0124899	-0.221737	0.0280623	0.220961	-0.0902018	-0.259067	-0.0724244	0.250133	-0.193095	-0.296462	-0.172373	0.282623
90110_6w_G2_D.tif	0.330526	-0.010899	-0.269746	-0.168618	-0.268487	0.17573	0.227137	-0.119427	0.230605	0.119562	0.123537	-0.175734	0.128332	0.176666	0.0194841	-0.215824	0.0229571	0.21219	-0.0852507	-0.24956	-0.0805549	0.250353	-0.191981	-0.277289	-0.186558	0.282851
90114_6w_G2_D.tif	0.330867	-0.0130146	-0.271845	-0.16068	-0.270142	0.167765	0.225365	-0.118246	0.23244	0.123129	0.120994	-0.172198	0.129185	0.177745	0.0182839	-0.216739	0.0246317	0.214972	-0.0853631	-0.252514	-0.0794821	0.249102	-0.190757	-0.282726	-0.184178	0.283407
90123_6w_G2_D.tif	0.346123	-0.00228362	-0.282781	-0.173565	-0.274581	0.170397	0.236008	-0.10765	0.241377	0.113736	0.126494	-0.164862	0.13431	0.164812	0.0170403	-0.207069	0.0275192	0.206859	-0.0943977	-0.23784	-0.0815357	0.23763	-0.205288	-0.271455	-0.190289	0.271291
90144_6w_G2_D.tif	0.330145	-0.00903523	-0.266099	-0.174796	-0.2655	0.186492	0.228054	-0.118673	0.227106	0.11402	0.125565	-0.179036	0.124895	0.171919	0.0204712	-0.215434	0.0206823	0.211939	-0.0850957	-0.245791	-0.083355	0.248811	-0.189947	-0.279034	-0.186921	0.288618
90145_6w_G2_D.tif	0.334195	-0.00839992	-0.271453	-0.183381	-0.26645	0.170334	0.225921	-0.112927	0.234616	0.119292	0.118955	-0.16576	0.130677	0.172574	0.0140123	-0.20895	0.0267807	0.213728	-0.0911771	-0.246176	-0.0774846	0.248936	-0.196628	-0.283478	-0.181964	0.284209
90146_6w_G2_D.tif	0.346216	-0.0113482	-0.277232	-0.172103	-0.276453	0.180649	0.239193	-0.115988	0.238327	0.108639	0.129262	-0.164743	0.130133	0.162731	0.0204844	-0.204251	0.0219716	0.204814	-0.0896151	-0.235166	-0.0866622	0.241047	-0.199183	-0.26892	-0.196443	0.27464
90161_6w_G2_D.tif	0.306585	-0.0111513	-0.257515	-0.139438	-0.254973	0.178324	0.210836	-0.129219	0.213794	0.134662	0.116017	-0.193137	0.11807	0.191989	0.0208147	-0.237932	0.0201914	0.226748	-0.075535	-0.271498	-0.0757596	0.260819	-0.171299	-0.308754	-0.171225	0.298588
90172_6w_G2_D.tif	0.311138	-0.00784761	-0.264297	-0.176262	-0.251882	0.165132	0.204018	-0.111326	0.229259	0.145648	0.107318	-0.179629	0.133334	0.198778	0.010075	-0.228942	0.0333321	0.227811	-0.0884963	-0.269089	-0.0667663	0.253687	-0.190274	-0.300647	-0.166758	0.282688
90176_6w_G2_D.tif	0.320203	-0.0126045	-0.261607	-0.170925	-0.261627	0.178425	0.219992	-0.123764	0.222917	0.122433	0.119691	-0.180542	0.12342	0.180453	0.0198278	-0.223599	0.0227865	0.221949	-0.082408	-0.253716	-0.07857	0.256924	-0.184181	-0.287103	-0.180444	0.29207
90177_6w_G2_D.tif	0.32744	-0.00310865	-0.277439	-0.145261	-0.267383	0.149072	0.222568	-0.119612	0.230562	0.131732	0.118791	-0.178408	0.12847	0.180093	0.0155395	-0.220195	0.0280471	0.221236	-0.087023	-0.258438	-0.0733831	0.252523	-0.190775	-0.293597	-0.175414	0.283964
90178_6w_G2_D.tif	0.310478	-0.0187203	-0.253444	-0.158677	-0.258459	0.185088	0.213084	-0.128564	0.217246	0.128586	0.117171	-0.187314	0.118265	0.184125	0.0216803	-0.231477	0.019403	0.225172	-0.075133	-0.265138	-0.0790267	0.262449	-0.173144	-0.295494	-0.17812	0.299963
90183_6w_G2_D.tif	0.320561	-0.0131463	-0.255202	-0.194824	-0.255461	0.192503	0.217855	-0.118914	0.225663	0.122695	0.117814	-0.177912	0.12438	0.176616	0.0159183	-0.216313	0.023431	0.219886	-0.0859713	-0.25118	-0.0786573	0.256549	-0.188209	-0.286157	-0.18212	0.290198
90184_6w_G2_D.tif	0.324524	-0.0099841	-0.265779	-0.162617	-0.262866	0.181862	0.223772	-0.122924	0.224729	0.121928	0.12193	-0.179849	0.123521	0.177644	0.0200478	-0.221148	0.0216422	0.217611	-0.0829776	-0.253365	-0.0806411	0.251323	-0.185435	-0.28856	-0.182467	0.288077
90194_6w_G2_D.tif	0.334944	-0.0156751	-0.271714	-0.171032	-0.27181	0.174877	0.229251	-0.115187	0.231877	0.110375	0.123251	-0.165473	0.129667	0.174219	0.0197825	-0.212024	0.0240699	0.21436	-0.085895	-0.24682	-0.0820527	0.248474	-0.192721	-0.27883	-0.188649	0.282736
90199_6w_G2_D.tif	0.321585	-0.0142835	-0.257409	-0.192755	-0.259135	0.183548	0.217848	-0.117545	0.22565	0.119264	0.117233	-0.175398	0.125404	0.177127	0.0154438	-0.214181	0.024585	0.221407	-0.085227	-0.252614	-0.0776399	0.257905	-0.187869	-0.286108	-0.180469	0.293633
90208_6w_G2_D.tif	0.318024	-0.00866014	-0.260124	-0.173201	-0.253922	0.192812	0.219771	-0.125118	0.221115	0.125991	0.118858	-0.179902	0.12176	0.180859	0.0189965	-0.223974	0.0211121	0.218655	-0.082689	-0.258168	-0.0781312	0.255948	-0.184663	-0.292446	-0.180108	0.287204
90209_6w_G2_D.tif	0.319583	0.00247934	-0.263562	-0.191162	-0.247733	0.187952	0.217894	-0.117224	0.224178	0.128738	0.113698	-0.172694	0.125921	0.181098	0.0115528	-0.218174	0.0266157	0.218216	-0.0901458	-0.260405	-0.0723933	0.252116	-0.193779	-0.297095	-0.171829	0.286155
90211_6w_G2_D.tif	0.283356	-0.00800896	-0.241063	-0.150308	-0.238308	0.194168	0.200805	-0.144443	0.191283	0.133438	0.112956	-0.207148	0.104248	0.196378	0.024087	-0.250372	0.0187083	0.246602	-0.0657615	-0.28599	-0.0715941	0.278866	-0.157119	-0.318138	-0.161597	0.314957
90212_6w_G2_D.tif	0.314241	-0.0107377	-0.258195	-0.170608	-0.255129	0.18524	0.217762	-0.129842	0.218869	0.127652	0.118459	-0.184721	0.121223	0.184995	0.0197126	-0.227053	0.0228567	0.226851	-0.0813385	-0.257663	-0.0780045	0.256996	-0.181992	-0.291252	-0.178464	0.290142
90216_6w_G2_D.tif	0.318636	-0.0049359	-0.267387	-0.153508	-0.260317	0.173927	0.220317	-0.124041	0.220147	0.124304	0.120415	-0.183884	0.121543	0.179408	0.0200127	-0.226315	0.0247795	0.226858	-0.0812127	-0.261943	-0.0756123	0.257811	-0.183833	-0.294426	-0.177488	0.286746
90218_6w_G2_D.tif	0.302057	-0.00043179	-0.255609	-0.187151	-0.242507	0.173922	0.204703	-0.124054	0.214884	0.138286	0.107789	-0.184829	0.122733	0.194059	0.0118433	-0.231335	0.0299872	0.23592	-0.0848046	-0.271129	-0.0657718	0.264721	-0.18409	-0.304897	-0.161215	0.296919
90223_6w_G2_D.tif	0.327507	-0.018654	-0.265188	-0.180777	-0.268562	0.166876	0.221644	-0.117903	0.23147	0.120501	0.119903	-0.175355	0.129535	0.179248	0.0167942	-0.21286	0.0261769	0.221306	-0.0871609	-0.243824	-0.0778974	0.256734	-0.190098	-0.281278	-0.184124	0.285986
90225_6w_G2_D.tif	0.304157	-0.00433732	-0.261932	-0.160704	-0.25238	0.145758	0.207036	-0.132942	0.217603	0.146031	0.110252	-0.192975	0.12446	0.201723	0.0129098	-0.231577	0.0283638	0.233259	-0.0827727	-0.26968	-0.0655904	0.267715	-0.180954	-0.301332	-0.161152	0.299062
90228_6w_G2_D.tif	0.312995	-0.0143314	-0.258177	-0.166261	-0.257887	0.178272	0.213629	-0.124068	0.220045	0.128251	0.117248	-0.18742	0.122887	0.187623	0.0186667	-0.226865	0.0234411	0.226625	-0.0805573	-0.259482	-0.0766905	0.258812	-0.179346	-0.295478	-0.176254	0.294324
90235_6w_G2_D.tif	0.343604	-0.00191116	-0.284993	-0.164229	-0.276481	0.146836	0.23493	-0.117954	0.241954	0.124385	0.125692	-0.17423	0.135779	0.174294	0.0141676	-0.204178	0.0292417	0.212362	-0.0952294	-0.236546	-0.0789755	0.238939	-0.204179	-0.271787	-0.185511	0.274021
90238_6w_G2_D.tif	0.288674	-0.0079625	-0.241845	-0.174494	-0.234451	0.192047	0.199732	-0.141932	0.204042	0.14685	0.106383	-0.196231	0.111565	0.197783	0.014994	-0.238763	0.0219352	0.240113	-0.0747874	-0.280727	-0.0693349	0.272066	-0.16696	-0.316163	-0.159946	0.307413
90243_6w_G2_D.tif	0.299814	-0.0108814	-0.251639	-0.142235	-0.24969	0.183305	0.209111	-0.140278	0.20744	0.137292	0.114869	-0.196812	0.112536	0.191963	0.0211792	-0.238445	0.0193975	0.234623	-0.0720889	-0.276278	-0.0751561	0.266509	-0.166512	-0.31074	-0.16926	0.301977
90250_6w_G2_D.tif	0.337432	-0.0140021	-0.272887	-0.152093	-0.275021	0.175043	0.233713	-0.124668	0.232921	0.118388	0.1282	-0.178367	0.125699	0.169571	0.0215713	-0.211192	0.0199551	0.211172	-0.0845162	-0.240872	-0.086619	0.243919	-0.188736	-0.279178	-0.191713	0.282279
90252_6w_G2_D.tif	0.332273	-0.0111406	-0.266986	-0.181749	-0.265642	0.18545	0.228079	-0.118026	0.23179	0.117463	0.123453	-0.172631	0.127379	0.170122	0.018428	-0.211938	0.0244518	0.216114	-0.0874429	-0.245321	-0.0821211	0.247858	-0.1945	-0.275959	-0.189162	0.279757
90258_6w_G2_D.tif	0.323804	-0.00965253	-0.263576	-0.184676	-0.258428	0.174111	0.222051	-0.13215	0.234572	0.144087	0.117614	-0.18236	0.132209	0.19158	0.0126312	-0.215192	0.0262491	0.216972	-0.0919213	-0.244968	-0.0778501	0.244668	-0.195955	-0.27751	-0.181401	0.275092
90264_6w_G2_D.tif	0.311891	-0.00596567	-0.248195	-0.206279	-0.23993	0.201775	0.213358	-0.127613	0.22246	0.137351	0.11106	-0.17872	0.122736	0.185027	0.0104643	-0.218923	0.0236363	0.222144	-0.088777	-0.258623	-0.0752649	0.255746	-0.189144	-0.295317	-0.174295	0.289397
90265_6w_G2_D.tif	0.329001	-0.0156473	-0.261508	-0.180793	-0.262781	0.190129	0.225812	-0.12345	0.229982	0.121928	0.121702	-0.174948	0.125157	0.174224	0.0180974	-0.212997	0.0203065	0.213098	-0.0859885	-0.244526	-0.0840157	0.24843	-0.188379	-0.282235	-0.187386	0.286788
90268_6w_G2_D.tif	0.329749	-0.0136013	-0.271021	-0.161474	-0.268997	0.164299	0.224667	-0.120499	0.230683	0.122436	0.120034	-0.172545	0.128052	0.178768	0.0171039	-0.214506	0.0249835	0.219077	-0.0860154	-0.250076	-0.0790228	0.249981	-0.18868	-0.288752	-0.181535	0.286893
90270_6w_G2_D.tif	0.328166	-0.0117311	-0.26843	-0.177821	-0.268144	0.159941	0.224411	-0.123361	0.231213	0.123711	0.120207	-0.176117	0.130514	0.182965	0.016863	-0.216212	0.0270361	0.221395	-0.0885227	-0.244464	-0.0779621	0.250996	-0.193584	-0.275728	-0.181768	0.286427
90275_6w_G2_D.tif	0.312377	-0.00705341	-0.259063	-0.167871	-0.251357	0.189019	0.215508	-0.12763	0.219773	0.134152	0.117606	-0.187951	0.121512	0.185906	0.018625	-0.229668	0.0237092	0.226058	-0.0824324	-0.260639	-0.0763338	0.255578	-0.182908	-0.29522	-0.177016	0.28532
90278_6w_G2_D.tif	0.325613	-0.00466315	-0.267001	-0.190583	-0.260674	0.156024	0.219563	-0.119933	0.231436	0.130417	0.114071	-0.173131	0.130397	0.181716	0.00980554	-0.211378	0.0287038	0.218912	-0.092568	-0.249022	-0.0717544	0.255759	-0.195244	-0.286762	-0.172347	0.292644
90285_6w_G2_D.tif	0.343989	-0.00588609	-0.287934	-0.148481	-0.282762	0.127538	0.234943	-0.116939	0.240822	0.118581	0.126114	-0.172074	0.135622	0.175593	0.0178082	-0.211583	0.0288846	0.214458	-0.0918842	-0.239043	-0.0782232	0.247245	-0.201461	-0.269565	-0.185919	0.280157
90294_6w_G2_D.tif	0.325378	-0.0138034	-0.263374	-0.173489	-0.264886	0.176075	0.223776	-0.126222	0.227422	0.123596	0.120783	-0.178224	0.124929	0.177468	0.0181579	-0.215651	0.0228198	0.219492	-0.0839783	-0.250049	-0.0805061	0.253118	-0.18715	-0.281836	-0.183372	0.289525
90296_6w_G2_D.tif	0.340931	-0.00573595	-0.281631	-0.164823	-0.277608	0.138092	0.23067	-0.116561	0.241489	0.126761	0.122569	-0.172902	0.134898	0.173613	0.014478	-0.209396	0.0287539	0.211885	-0.0931097	-0.240092	-0.0777261	0.244604	-0.200946	-0.270854	-0.182768	0.285409
90298_6w_G2_D.tif	0.347577	-0.00775372	-0.27861	-0.177774	-0.275183	0.179944	0.238051	-0.11071	0.241388	0.111181	0.128364	-0.165559	0.133504	0.165123	0.0180635	-0.203591	0.0238753	0.202514	-0.0932474	-0.233412	-0.0863122	0.234382	-0.203073	-0.268483	-0.194397	0.27414
90299_6w_G2_D.tif	0.312613	-0.00824723	-0.255372	-0.191831	-0.251107	0.176961	0.213549	-0.127836	0.22147	0.132804	0.112206	-0.179147	0.123852	0.186215	0.0135451	-0.222299	0.0266886	0.228688	-0.0859318	-0.258457	-0.0724863	0.261065	-0.186953	-0.291494	-0.172075	0.293578
90301_6w_G2_D.tif	0.317296	-0.00700279	-0.264504	-0.164176	-0.257758	0.184804	0.220972	-0.125166	0.219833	0.122957	0.122315	-0.186109	0.123679	0.184688	0.0212694	-0.226398	0.0245595	0.225859	-0.0818468	-0.258123	-0.0773513	0.255655	-0.186444	-0.287211	-0.182019	0.280223
90304_6w_G2_D.tif	0.305842	-0.0037521	-0.261672	-0.14921	-0.253835	0.154976	0.211218	-0.138447	0.215848	0.144811	0.112353	-0.190402	0.120638	0.196258	0.0172561	-0.237639	0.0245145	0.229702	-0.0796915	-0.270826	-0.0692181	0.266053	-0.17823	-0.29987	-0.165021	0.298346
90305_6w_G2_D.tif	0.314371	-0.00575653	-0.267891	-0.160322	-0.259908	0.150643	0.214699	-0.126866	0.223434	0.136212	0.115566	-0.186886	0.127789	0.194365	0.0161163	-0.229079	0.0296759	0.231941	-0.0849399	-0.260977	-0.0702386	0.259396	-0.18767	-0.289755	-0.171004	0.287083
90313_6w_G2_D.tif	0.314963	-0.00145939	-0.266269	-0.176808	-0.255482	0.159002	0.214855	-0.124367	0.22452	0.136842	0.114765	-0.184589	0.128313	0.191256	0.0140628	-0.226266	0.0299372	0.2277	-0.0885569	-0.25744	-0.069005	0.259302	-0.1919	-0.288835	-0.170203	0.285662
90316_6w_G2_D.tif	0.324614	-0.00335451	-0.269359	-0.175868	-0.262196	0.159755	0.221684	-0.12075	0.22656	0.123669	0.116729	-0.172819	0.126833	0.178954	0.0156576	-0.220441	0.0269758	0.221146	-0.0882745	-0.252436	-0.0733643	0.256912	-0.191697	-0.287574	-0.174163	0.292806
90329_6w_G2_D.tif	0.332566	-0.00845071	-0.269363	-0.164359	-0.266294	0.189647	0.232366	-0.124881	0.228142	0.116705	0.127437	-0.178072	0.12482	0.172716	0.0218469	-0.215319	0.0200685	0.21184	-0.0844567	-0.246305	-0.0857842	0.243476	-0.190821	-0.277307	-0.190528	0.280307
90330_6w_G2_D.tif	0.343997	-0.0116551	-0.280456	-0.156254	-0.283017	0.15674	0.236394	-0.116166	0.238564	0.112009	0.128819	-0.170998	0.131838	0.168005	0.0213219	-0.2103	0.0240634	0.208833	-0.0870938	-0.24052	-0.0844176	0.243675	-0.197202	-0.264943	-0.19281	0.281575
90337_6w_G2_D.tif	0.304886	-0.00579461	-0.25651	-0.155831	-0.249856	0.173632	0.208184	-0.130222	0.21372	0.139606	0.111345	-0.188742	0.115735	0.185516	0.016865	-0.235602	0.0225151	0.229761	-0.0784258	-0.271736	-0.0708042	0.266782	-0.173043	-0.311331	-0.164611	0.303962
90338_6w_G2_D.tif	0.318649	-0.011168	-0.266511	-0.149121	-0.265537	0.156484	0.218376	-0.125867	0.221803	0.126391	0.118879	-0.185201	0.122795	0.183318	0.0190626	-0.225162	0.0242876	0.227092	-0.0808821	-0.258672	-0.0751638	0.261406	-0.180625	-0.295369	-0.175134	0.29587
90343_6w_G2_D.tif	0.344209	-0.0123089	-0.280222	-0.150594	-0.281748	0.167146	0.237604	-0.11488	0.236156	0.107813	0.130364	-0.170374	0.129566	0.165978	0.0230884	-0.21113	0.0217366	0.206935	-0.0859046	-0.239879	-0.0858666	0.244013	-0.194441	-0.272079	-0.194543	0.27936
90347_6w_G2_D.tif	0.354963	-0.00346738	-0.293559	-0.127266	-0.28716	0.159083	0.244334	-0.10915	0.244272	0.111503	0.133628	-0.17004	0.133722	0.161709	0.0208332	-0.20348	0.0230697	0.197885	-0.0904124	-0.23937	-0.0860807	0.233649	-0.201258	-0.277963	-0.196353	0.266906
90349_6w_G2_D.tif	0.334467	-0.00322324	-0.277663	-0.162658	-0.268477	0.169413	0.228954	-0.113909	0.232815	0.119259	0.123599	-0.173165	0.129937	0.173695	0.017819	-0.215407	0.0265777	0.214589	-0.0894866	-0.247776	-0.078369	0.245686	-0.196311	-0.283443	-0.183862	0.276939
90352_6w_G2_D.tif	0.353701	-0.0132705	-0.284199	-0.159115	-0.285666	0.173503	0.242862	-0.108555	0.243646	0.104303	0.132507	-0.162794	0.132864	0.157962	0.0220757	-0.202457	0.0221495	0.199941	-0.0893513	-0.233607	-0.0890233	0.236233	-0.200935	-0.264796	-0.20063	0.272653
90364_6w_G2_D.tif	0.325502	-0.0109212	-0.270506	-0.171719	-0.269753	0.148471	0.221967	-0.120425	0.229377	0.121893	0.120867	-0.181638	0.131386	0.18734	0.0176511	-0.219644	0.0285287	0.224633	-0.0875844	-0.246315	-0.0751427	0.256248	-0.192832	-0.275958	-0.179461	0.288036
90368_6w_G2_D.tif	0.333781	-0.00856973	-0.271311	-0.179393	-0.269715	0.170985	0.228479	-0.115652	0.232575	0.114664	0.123223	-0.171354	0.130446	0.17379	0.0184463	-0.21408	0.0267126	0.217302	-0.0886868	-0.244634	-0.0807502	0.245835	-0.197001	-0.272314	-0.186199	0.283421
90370_6w_G2_D.tif	0.326539	-0.00523522	-0.27418	-0.160508	-0.266534	0.154665	0.221963	-0.118652	0.23067	0.129133	0.119058	-0.178192	0.129599	0.181271	0.0166674	-0.222556	0.0288907	0.223048	-0.088184	-0.252537	-0.0740191	0.25264	-0.192891	-0.285484	-0.177579	0.282407
90371_6w_G2_D.tif	0.308432	-0.0153062	-0.250572	-0.172394	-0.248227	0.197009	0.212986	-0.133631	0.215875	0.132336	0.114299	-0.183823	0.118372	0.188843	0.0178537	-0.22644	0.0191809	0.225336	-0.0782182	-0.265494	-0.0791658	0.258052	-0.175239	-0.30138	-0.175576	0.296893
90378_6w_G2_D.tif	0.317287	-0.00743074	-0.252088	-0.196801	-0.250789	0.197986	0.218513	-0.122621	0.219012	0.119584	0.117884	-0.179502	0.119591	0.174581	0.0164401	-0.218247	0.0205021	0.218587	-0.0835943	-0.256514	-0.0786675	0.258999	-0.185859	-0.288175	-0.178231	0.299553
90384_6w_G2_D.tif	0.321793	-0.00892895	-0.265383	-0.159144	-0.264812	0.176836	0.226083	-0.132155	0.221654	0.121875	0.125841	-0.189574	0.12283	0.181626	0.0226059	-0.222264	0.0218977	0.222793	-0.0808241	-0.251812	-0.0808212	0.254905	-0.185588	-0.278519	-0.185276	0.284362
90389_6w_G2_D.tif	0.334187	-0.0108974	-0.266919	-0.183617	-0.265211	0.188877	0.231144	-0.120251	0.230527	0.113538	0.125176	-0.172031	0.126008	0.168407	0.018473	-0.207752	0.0223577	0.213735	-0.0880433	-0.241244	-0.0833975	0.248445	-0.194023	-0.277655	-0.19028	0.280447
90401_6w_G2_D.tif	0.310272	-0.0165722	-0.250626	-0.176549	-0.253199	0.187758	0.215225	-0.1379	0.218842	0.134783	0.117012	-0.189689	0.119753	0.188421	0.0186418	-0.225511	0.0199678	0.226094	-0.0802455	-0.25508	-0.0792079	0.260296	-0.177776	-0.290648	-0.17866	0.294598
90409_6w_G2_D.tif	0.340294	-0.0120958	-0.280809	-0.13426	-0.284543	0.141148	0.235538	-0.123241	0.23333	0.111794	0.129164	-0.17729	0.128117	0.171125	0.0224826	-0.212288	0.0225372	0.214539	-0.0836206	-0.243978	-0.0830906	0.251568	-0.190137	-0.275752	-0.189262	0.28873
90412_6w_G2_D.tif	0.314784	-0.0055641	-0.257844	-0.190373	-0.254747	0.169382	0.214197	-0.123421	0.221804	0.12888	0.114071	-0.181586	0.124243	0.183481	0.0136886	-0.22124	0.0257577	0.223592	-0.0861143	-0.256983	-0.0717336	0.263383	-0.187399	-0.289497	-0.170707	0.299947
90415_6w_G2_D.tif	0.347152	-0.00927178	-0.28238	-0.173038	-0.279416	0.162069	0.234442	-0.103256	0.241921	0.107164	0.125604	-0.16138	0.135725	0.166346	0.0163991	-0.202212	0.0271845	0.206071	-0.0922888	-0.240006	-0.0818713	0.240193	-0.202596	-0.272439	-0.189875	0.27976
90418_6w_G2_D.tif	0.318385	-0.00687895	-0.26734	-0.143131	-0.261651	0.175671	0.221075	-0.12609	0.219215	0.124111	0.12155	-0.185546	0.121816	0.184035	0.0217584	-0.229207	0.023018	0.225193	-0.0793423	-0.263676	-0.0779854	0.254262	-0.181568	-0.295248	-0.178931	0.286504
90420_6w_G2_D.tif	0.320883	-0.0065996	-0.262071	-0.17588	-0.257675	0.184474	0.223526	-0.127709	0.220467	0.12057	0.120641	-0.178884	0.120796	0.176122	0.0193489	-0.220645	0.0223792	0.222333	-0.0833604	-0.253879	-0.0782431	0.257386	-0.186432	-0.287219	-0.18026	0.28993
90423_6w_G2_D.tif	0.339103	-0.00254636	-0.282374	-0.156167	-0.273613	0.156674	0.233758	-0.119002	0.23535	0.119229	0.12664	-0.176608	0.131537	0.175231	0.0171032	-0.208486	0.0259492	0.211975	-0.0913574	-0.240089	-0.0790543	0.245277	-0.197878	-0.281074	-0.185164	0.275586
90427_6w_G2_D.tif	0.343828	-0.0137583	-0.276678	-0.161882	-0.275842	0.174513	0.237388	-0.123656	0.238502	0.11823	0.127083	-0.167257	0.129281	0.167697	0.0191053	-0.204759	0.0216927	0.208033	-0.0890881	-0.235988	-0.0867125	0.239071	-0.195166	-0.27619	-0.193392	0.275945
90441_6w_G2_D.tif	0.349477	-0.0108547	-0.287112	-0.15232	-0.285618	0.140419	0.239251	-0.120352	0.245276	0.121112	0.128046	-0.169122	0.135937	0.170719	0.0172136	-0.201778	0.0264433	0.20749	-0.0923023	-0.23412	-0.0825509	0.240919	-0.202175	-0.266544	-0.191885	0.274429
90446_6w_G2_D.tif	0.3332	-0.00534705	-0.275024	-0.160492	-0.271047	0.15884	0.229163	-0.121991	0.231429	0.121455	0.123728	-0.177893	0.127811	0.174	0.01766	-0.213597	0.0248589	0.216163	-0.0877269	-0.245731	-0.0793332	0.248477	-0.192513	-0.281103	-0.182205	0.287219
90453_6w_G2_D.tif	0.319157	-0.0183041	-0.262557	-0.149895	-0.268227	0.162634	0.21961	-0.130574	0.222797	0.127068	0.119997	-0.184831	0.122024	0.182939	0.0209777	-0.224449	0.0214239	0.224211	-0.0783771	-0.256902	-0.0785353	0.261645	-0.178253	-0.289474	-0.180037	0.295932
90457_6w_G2_D.tif	0.335489	-0.0110151	-0.278567	-0.159876	-0.273934	0.146968	0.225946	-0.114411	0.237622	0.125519	0.119687	-0.169616	0.133321	0.178274	0.0147675	-0.211859	0.0283231	0.215387	-0.0901484	-0.247793	-0.0761065	0.249182	-0.195497	-0.283833	-0.180903	0.283073
90462_6w_G2_D.tif	0.334784	-0.00839268	-0.27894	-0.138126	-0.277113	0.143047	0.230306	-0.124324	0.232175	0.122567	0.124749	-0.178955	0.127713	0.175116	0.0195713	-0.216424	0.0242781	0.217104	-0.0855785	-0.247059	-0.0791686	0.252247	-0.189728	-0.284295	-0.183048	0.287496
90465_6w_G2_D.tif	0.329866	-0.0159303	-0.272235	-0.124748	-0.277141	0.164143	0.230522	-0.13108	0.22684	0.120196	0.128394	-0.186219	0.124061	0.178795	0.0247071	-0.219379	0.0209378	0.221368	-0.0779602	-0.255505	-0.0841603	0.251656	-0.182887	-0.282531	-0.190945	0.279234
90471_6w_G2_D.tif	0.347502	-0.00848458	-0.287987	-0.150115	-0.280524	0.152742	0.236119	-0.10983	0.242441	0.115147	0.125323	-0.160754	0.135034	0.169025	0.0169132	-0.205528	0.0275473	0.208856	-0.0921626	-0.24209	-0.0804477	0.240393	-0.200983	-0.281378	-0.188775	0.272016
90474_6w_G2_D.tif	0.349882	-0.00572706	-0.287028	-0.167731	-0.278521	0.157181	0.236718	-0.108673	0.246242	0.118602	0.124535	-0.159735	0.136839	0.165563	0.0142646	-0.201184	0.0288246	0.206068	-0.0961698	-0.236609	-0.0801336	0.237733	-0.206142	-0.274944	-0.189311	0.269455
90475_6w_G2_D.tif	0.331878	-0.00725719	-0.275817	-0.167185	-0.2712	0.143003	0.225758	-0.122962	0.235514	0.130458	0.120144	-0.177599	0.132309	0.18083	0.014303	-0.213065	0.0294512	0.221557	-0.0908441	-0.245138	-0.0753966	0.250077	-0.196689	-0.276609	-0.17941	0.28389
90476_6w_G2_D.tif	0.31391	-0.0087706	-0.256198	-0.175038	-0.249904	0.193194	0.217255	-0.13195	0.220383	0.134544	0.115899	-0.181976	0.120663	0.18505	0.017053	-0.224764	0.0202167	0.21943	-0.08225	-0.261208	-0.0775905	0.256119	-0.182537	-0.294708	-0.176899	0.290078
90478_6w_G2_D.tif	0.337977	-0.0118977	-0.280381	-0.163952	-0.275904	0.138951	0.227824	-0.117103	0.240354	0.126846	0.119734	-0.168007	0.136226	0.182483	0.0136903	-0.2089	0.0291357	0.21378	-0.0923427	-0.243472	-0.0760072	0.24771	-0.198831	-0.278157	-0.181476	0.28172
90492_6w_G2_D.tif	0.337837	-0.00818282	-0.284081	-0.13372	-0.279627	0.134291	0.230294	-0.119741	0.237938	0.12761	0.124445	-0.179219	0.133163	0.179636	0.0175257	-0.214643	0.0284674	0.219495	-0.0881524	-0.249793	-0.078393	0.244749	-0.195472	-0.279231	-0.183945	0.278748
90494_6w_G2_D.tif	0.346723	-0.00524638	-0.284461	-0.165505	-0.277671	0.161785	0.236957	-0.11199	0.242024	0.115781	0.126691	-0.165308	0.134838	0.168353	0.0170191	-0.205248	0.0265302	0.205452	-0.0934452	-0.237462	-0.081357	0.239804	-0.203558	-0.272228	-0.190291	0.271813
90501_6w_G2_D.tif	0.354177	-0.000592365	-0.297454	-0.149036	-0.284846	0.139109	0.239738	-0.104324	0.249983	0.118934	0.128069	-0.164696	0.141439	0.169684	0.0156782	-0.205226	0.0317145	0.205765	-0.0978702	-0.236038	-0.0788142	0.23458	-0.211365	-0.269329	-0.190449	0.261168
90502_6w_G2_D.tif	0.336164	-0.00285782	-0.279108	-0.16154	-0.267462	0.173287	0.230198	-0.113982	0.234258	0.120776	0.123595	-0.171196	0.130954	0.17508	0.0170029	-0.213389	0.0261277	0.211641	-0.0908108	-0.24689	-0.0789828	0.242224	-0.19742	-0.286083	-0.184517	0.27293
90503_6w_G2_D.tif	0.341553	-0.00271802	-0.281525	-0.167794	-0.272016	0.167847	0.234346	-0.114559	0.238409	0.118666	0.125691	-0.169729	0.133518	0.172572	0.0165063	-0.207926	0.0270908	0.209923	-0.0931041	-0.240534	-0.080472	0.239102	-0.202264	-0.275872	-0.187734	0.271023
90511_6w_G2_D.tif	0.343201	-0.00740254	-0.283086	-0.129871	-0.279651	0.168789	0.238329	-0.118675	0.234648	0.113694	0.130868	-0.17428	0.128235	0.169188	0.0230544	-0.213114	0.0204981	0.205309	-0.0849335	-0.246372	-0.0856012	0.24095	-0.192563	-0.28236	-0.192999	0.274145
90515_6w_G2_D.tif	0.329574	-0.00163728	-0.275305	-0.164569	-0.264122	0.16775	0.225285	-0.118096	0.231874	0.127888	0.120492	-0.175984	0.13043	0.180445	0.0156766	-0.217573	0.0277379	0.217101	-0.089586	-0.252762	-0.0764861	0.244447	-0.195939	-0.28499	-0.179633	0.27798
90517_6w_G2_D.tif	0.355762	-0.00146869	-0.299935	-0.112145	-0.289728	0.137546	0.242953	-0.104613	0.247195	0.114182	0.131658	-0.167737	0.137764	0.166334	0.0192917	-0.207414	0.0282816	0.205247	-0.0927312	-0.244379	-0.0816606	0.235823	-0.205208	-0.281427	-0.193643	0.260053
90521_6w_G2_D.tif	0.316893	-0.00972035	-0.265334	-0.149272	-0.263559	0.161191	0.21968	-0.134233	0.222073	0.133482	0.120138	-0.191097	0.124623	0.192416	0.0196775	-0.227732	0.0234697	0.225271	-0.0811309	-0.257638	-0.0772814	0.2546	-0.18234	-0.287643	-0.176908	0.290374
90526_6w_G2_D.tif	0.314436	-0.0177297	-0.256727	-0.165971	-0.261237	0.168696	0.219494	-0.144616	0.221275	0.135884	0.117837	-0.186171	0.121791	0.190684	0.0192394	-0.223404	0.0205117	0.225203	-0.0798683	-0.253805	-0.0780954	0.262308	-0.179506	-0.284347	-0.17915	0.293269
90540_6w_G2_D.tif	0.31306	-0.00470429	-0.269742	-0.138739	-0.262601	0.138174	0.21403	-0.126661	0.219644	0.133229	0.116368	-0.191097	0.123948	0.19094	0.0176803	-0.232301	0.0282947	0.235161	-0.081256	-0.266857	-0.0692547	0.266462	-0.181731	-0.298436	-0.16844	0.294832
90545_6w_G2_D.tif	0.338838	-0.00382996	-0.287333	-0.146139	-0.277768	0.112416	0.228373	-0.114568	0.238953	0.124241	0.120528	-0.171609	0.134987	0.177621	0.0137528	-0.211844	0.0308365	0.217904	-0.0920929	-0.247891	-0.0729544	0.254128	-0.199008	-0.281552	-0.177112	0.291122
90555_6w_G2_D.tif	0.314391	-0.0122962	-0.2628	-0.155724	-0.259325	0.171942	0.216109	-0.130119	0.222586	0.135233	0.116812	-0.184796	0.125095	0.192127	0.0181319	-0.226629	0.0241484	0.224651	-0.0803696	-0.265243	-0.0754979	0.25674	-0.182383	-0.292097	-0.176898	0.286213
90556_6w_G2_D.tif	0.318149	-0.00402005	-0.260438	-0.177228	-0.251399	0.193708	0.219848	-0.125152	0.222317	0.130345	0.119086	-0.183371	0.121444	0.178598	0.017269	-0.222817	0.0221357	0.218768	-0.0852265	-0.256104	-0.0771749	0.254662	-0.187078	-0.292376	-0.178933	0.284987
90558_6w_G2_D.tif	0.335309	-0.0089706	-0.273142	-0.146705	-0.271352	0.188974	0.23383	-0.119532	0.22845	0.112862	0.130309	-0.180157	0.123965	0.168811	0.0245787	-0.217783	0.0183201	0.208013	-0.0818369	-0.248851	-0.0870226	0.243689	-0.188349	-0.279942	-0.193059	0.279592
90562_6w_G2_D.tif	0.339317	-0.00791519	-0.275868	-0.16198	-0.273571	0.179233	0.234486	-0.113926	0.231573	0.107252	0.128308	-0.170724	0.127012	0.165482	0.0218646	-0.212107	0.0216028	0.208431	-0.085821	-0.244517	-0.0843583	0.245335	-0.193676	-0.27697	-0.190868	0.282407
90572_6w_G2_D.tif	0.288305	-0.0068875	-0.243863	-0.183445	-0.23466	0.177291	0.194254	-0.136022	0.210331	0.156108	0.100865	-0.193301	0.118311	0.204544	0.0100849	-0.238878	0.0264713	0.238767	-0.0797939	-0.280554	-0.063693	0.272325	-0.172226	-0.316018	-0.154385	0.30607
90579_6w_G2_D.tif	0.342684	-0.00400259	-0.288451	-0.158903	-0.277455	0.134715	0.231505	-0.110589	0.242167	0.121097	0.122457	-0.167002	0.138236	0.178742	0.0138259	-0.207816	0.0316832	0.214035	-0.0950668	-0.242503	-0.0747376	0.245464	-0.204548	-0.277337	-0.182299	0.2741
90583_6w_G1_D.tif	0.323589	-0.0114273	-0.267925	-0.163188	-0.268975	0.149997	0.22213	-0.128229	0.227045	0.126993	0.120366	-0.183828	0.126235	0.181624	0.0187077	-0.222384	0.0268225	0.229052	-0.0849301	-0.247857	-0.0766318	0.257236	-0.187543	-0.279858	-0.17889	0.291871
90584_6w_G2_D.tif	0.306446	-0.00964212	-0.250654	-0.181168	-0.248066	0.189155	0.213404	-0.135934	0.214498	0.133242	0.115448	-0.188883	0.118032	0.187219	0.0180852	-0.228611	0.0226152	0.231091	-0.080082	-0.262082	-0.0756298	0.263075	-0.179621	-0.292737	-0.174475	0.295275
90590_6w_G2_D.tif	0.311753	-0.0102913	-0.260723	-0.145943	-0.259984	0.168359	0.2165	-0.137069	0.218794	0.138063	0.119306	-0.196022	0.119957	0.188843	0.0203396	-0.230604	0.0216569	0.227	-0.0781906	-0.26197	-0.0760072	0.261839	-0.177264	-0.293467	-0.176138	0.291263
90601_6w_G2_D.tif	0.331269	-0.00266	-0.280509	-0.140697	-0.271517	0.150525	0.227818	-0.120588	0.230724	0.123722	0.123158	-0.178822	0.130549	0.18399	0.0181885	-0.219146	0.0269626	0.218181	-0.086333	-0.256367	-0.0769265	0.246457	-0.19317	-0.285151	-0.180214	0.280555
90604_6w_G2_D.tif	0.325977	-0.0106886	-0.275706	-0.128309	-0.275059	0.117869	0.221939	-0.126452	0.229319	0.1325	0.120731	-0.19032	0.128148	0.187299	0.0181375	-0.225303	0.0267119	0.226762	-0.0841697	-0.252936	-0.074871	0.258994	-0.185625	-0.287662	-0.175534	0.298247
90605_6w_G2_D.tif	0.351352	-0.00693092	-0.286756	-0.16843	-0.284114	0.140832	0.238211	-0.109207	0.244351	0.109203	0.126068	-0.160468	0.135158	0.160781	0.0156016	-0.199357	0.0273394	0.206086	-0.0945892	-0.232218	-0.0805096	0.245496	-0.203616	-0.270726	-0.188496	0.284938
90608_6w_G2_D.tif	0.347516	-0.00791336	-0.289567	-0.134513	-0.285373	0.14058	0.237622	-0.111978	0.240937	0.112657	0.128895	-0.170988	0.134761	0.172513	0.019211	-0.207865	0.0265983	0.210587	-0.0899234	-0.241431	-0.0823236	0.239312	-0.198741	-0.278115	-0.189611	0.277153
90611_6w_G2_D.tif	0.337241	-0.0123394	-0.279328	-0.152129	-0.279568	0.14228	0.229647	-0.117566	0.236344	0.119503	0.123552	-0.171816	0.131393	0.173317	0.0185468	-0.213161	0.0270841	0.217468	-0.0866238	-0.248225	-0.0784478	0.252456	-0.194443	-0.274435	-0.185397	0.284648
90619_6w_G2_D.tif	0.330842	-0.0165461	-0.275238	-0.1231	-0.280893	0.119146	0.227867	-0.132915	0.228796	0.122952	0.123384	-0.181639	0.126135	0.183206	0.0207325	-0.219272	0.0225703	0.222073	-0.081524	-0.249706	-0.0791699	0.260493	-0.182975	-0.287094	-0.180527	0.302402
90621_6w_G2_D.tif	0.333365	-0.0124318	-0.269658	-0.160974	-0.268468	0.187467	0.23057	-0.121147	0.230603	0.118212	0.126754	-0.177975	0.125033	0.170141	0.0209131	-0.212497	0.0204405	0.211787	-0.0840807	-0.246809	-0.0849792	0.246085	-0.189276	-0.28117	-0.191216	0.27931
90625_6w_G2_D.tif	0.318268	-0.00646283	-0.268844	-0.133716	-0.264183	0.153232	0.220683	-0.135791	0.220914	0.134354	0.118482	-0.184533	0.12158	0.187041	0.019519	-0.229098	0.0221245	0.222711	-0.08011	-0.263629	-0.0746047	0.260996	-0.180135	-0.29825	-0.173694	0.293145
90627_6w_G2_D.tif	0.304141	-0.0106108	-0.258449	-0.152246	-0.253503	0.160165	0.205176	-0.127299	0.21641	0.14084	0.109185	-0.187102	0.121746	0.196465	0.0152713	-0.235129	0.0261956	0.233528	-0.078624	-0.275701	-0.0697258	0.263184	-0.174632	-0.309399	-0.163191	0.303304
90632_6w_G2_D.tif	0.322953	-0.0113409	-0.272751	-0.166074	-0.266899	0.129414	0.214537	-0.1174	0.233236	0.137347	0.113504	-0.180441	0.133693	0.191832	0.0112005	-0.218654	0.0324949	0.228026	-0.0902129	-0.253476	-0.0690641	0.258081	-0.192337	-0.288486	-0.170354	0.291171
90648_6w_G2_D.tif	0.309772	-0.00424046	-0.263146	-0.172105	-0.254258	0.151058	0.210434	-0.128603	0.221575	0.141541	0.111452	-0.186595	0.125814	0.193615	0.0134608	-0.229563	0.0299177	0.233268	-0.0860353	-0.261964	-0.0670687	0.264878	-0.186284	-0.294589	-0.165633	0.293298
90655_6w_G2_D.tif	0.332991	-0.00850717	-0.274199	-0.165775	-0.271772	0.161595	0.227548	-0.116211	0.232284	0.118203	0.123713	-0.176287	0.129551	0.174737	0.0187384	-0.216017	0.0259815	0.21677	-0.0879939	-0.244411	-0.0788694	0.250326	-0.193749	-0.278445	-0.184222	0.284023
90656_6w_G2_D.tif	0.312788	-0.00920463	-0.260948	-0.152002	-0.258774	0.174467	0.216673	-0.131362	0.217781	0.131013	0.119038	-0.190776	0.119872	0.185464	0.02055	-0.230486	0.0231168	0.229516	-0.0783853	-0.263673	-0.0770766	0.258046	-0.178519	-0.293851	-0.176116	0.292848
90663_6w_G2_D.tif	0.32193	0.00021136	-0.276284	-0.139788	-0.26517	0.130511	0.218693	-0.123254	0.225859	0.133426	0.116062	-0.182537	0.126314	0.183457	0.0146273	-0.224696	0.0284267	0.226337	-0.0855896	-0.263191	-0.0701116	0.259324	-0.186911	-0.298602	-0.167844	0.298801
90666_6w_G2_D.tif	0.348124	-0.00225215	-0.290882	-0.163916	-0.280012	0.128179	0.233501	-0.108479	0.247538	0.124396	0.122303	-0.16496	0.140442	0.173968	0.0114722	-0.203067	0.0323024	0.208678	-0.0983205	-0.237854	-0.0755295	0.240296	-0.208421	-0.272722	-0.182516	0.277735
90672_6w_G2_D.tif	0.334899	-0.00527361	-0.277527	-0.168592	-0.27277	0.159284	0.230108	-0.114048	0.231825	0.111178	0.125457	-0.17416	0.131211	0.175386	0.019039	-0.213486	0.0270621	0.216312	-0.0889002	-0.24411	-0.0778911	0.251394	-0.197469	-0.274902	-0.185044	0.281017
90680_6w_G2_D.tif	0.327386	-0.0119741	-0.270708	-0.151167	-0.26981	0.161549	0.225876	-0.126204	0.226052	0.120429	0.12176	-0.175838	0.124271	0.177329	0.0198431	-0.218078	0.0229013	0.220356	-0.0824263	-0.253542	-0.0785793	0.256546	-0.185134	-0.28911	-0.181434	0.289705
90682_6w_G2_D.tif	0.358822	-0.00296617	-0.290714	-0.168511	-0.282533	0.178319	0.246141	-0.100031	0.245326	0.0971413	0.132453	-0.153925	0.136092	0.155407	0.0198269	-0.198847	0.0251332	0.196848	-0.0947949	-0.232761	-0.0871533	0.230025	-0.209455	-0.266689	-0.199143	0.26599
90684_6w_G2_D.tif	0.31041	-0.0113312	-0.255112	-0.187096	-0.254258	0.169571	0.212893	-0.131768	0.22061	0.133775	0.112806	-0.182089	0.124239	0.18979	0.0151976	-0.224512	0.0271829	0.231984	-0.0833426	-0.260141	-0.0720334	0.264365	-0.185648	-0.28634	-0.172945	0.293793
90688_6w_G2_D.tif	0.3247	-0.00765328	-0.26452	-0.184136	-0.262045	0.170918	0.22183	-0.120237	0.226544	0.120527	0.118598	-0.175561	0.126213	0.176933	0.0155232	-0.214904	0.0256823	0.220802	-0.0870631	-0.250914	-0.0763685	0.25569	-0.19087	-0.284105	-0.178224	0.29264
90691_6w_G2_D.tif	0.330102	-0.0123501	-0.269803	-0.151561	-0.265779	0.186393	0.227636	-0.122509	0.229912	0.125094	0.124321	-0.178578	0.125219	0.176315	0.0207257	-0.218747	0.0200324	0.211456	-0.0840549	-0.249619	-0.0833586	0.245992	-0.186885	-0.289607	-0.188067	0.277723
90692_6w_G2_D.tif	0.340477	-0.00851402	-0.277372	-0.161914	-0.272781	0.179963	0.235029	-0.116812	0.235903	0.115712	0.12764	-0.170613	0.13033	0.170601	0.0200808	-0.209988	0.0224391	0.205898	-0.0880165	-0.243712	-0.0843125	0.24084	-0.196989	-0.274763	-0.192428	0.273303
90696_6w_G2_D.tif	0.330289	-0.00456398	-0.273117	-0.177259	-0.266607	0.161864	0.223246	-0.112068	0.233114	0.122515	0.119336	-0.172746	0.131776	0.177609	0.0157424	-0.21803	0.0290864	0.217844	-0.0906349	-0.248821	-0.0752878	0.249413	-0.197443	-0.279736	-0.179499	0.283979
90704_6w_G2_D.tif	0.325344	-0.00509607	-0.27502	-0.146733	-0.26689	0.151679	0.221117	-0.118266	0.228231	0.128393	0.119409	-0.181749	0.127644	0.182062	0.0163769	-0.221053	0.0270206	0.221694	-0.0860566	-0.25671	-0.073832	0.254374	-0.188153	-0.295781	-0.17519	0.287188
90706_6w_G2_D.tif	0.326418	-0.0117652	-0.26387	-0.176038	-0.267419	0.17676	0.223732	-0.118907	0.227795	0.118819	0.123936	-0.183317	0.125535	0.173717	0.0199736	-0.21746	0.0222819	0.214959	-0.0837906	-0.248054	-0.0802575	0.255972	-0.188891	-0.27553	-0.185443	0.290844
90714_6w_G2_D.tif	0.321545	-0.00951525	-0.264373	-0.169427	-0.262407	0.174108	0.219742	-0.119423	0.223706	0.121315	0.119861	-0.181252	0.123841	0.177826	0.0186979	-0.222122	0.0244076	0.222925	-0.0835961	-0.254069	-0.0773632	0.256193	-0.185403	-0.289274	-0.178659	0.292714
90716_6w_G2_D.tif	0.318298	-0.00758501	-0.26882	-0.162436	-0.263297	0.142187	0.214535	-0.121489	0.226008	0.13323	0.11441	-0.182486	0.127252	0.185998	0.0140198	-0.222822	0.0290741	0.228236	-0.0856028	-0.259492	-0.0695579	0.263698	-0.186743	-0.293121	-0.169576	0.296081
90718_6w_G2_D.tif	0.340176	-0.0112793	-0.282542	-0.142745	-0.279716	0.144421	0.23171	-0.118416	0.238725	0.123728	0.123612	-0.168826	0.131988	0.173247	0.0180445	-0.212706	0.0264112	0.213467	-0.0880497	-0.247772	-0.0791769	0.247705	-0.195192	-0.280093	-0.18599	0.279269
90732_6w_G2_D.tif	0.318809	0.000259363	-0.267359	-0.174852	-0.252094	0.182664	0.217896	-0.118931	0.225666	0.133658	0.11678	-0.180104	0.127022	0.184175	0.0150567	-0.224384	0.0277227	0.221355	-0.0886392	-0.259018	-0.0725574	0.252081	-0.19282	-0.293798	-0.175482	0.276893
90734_6w_G2_D.tif	0.32181	-0.00555054	-0.268667	-0.152616	-0.263002	0.163575	0.223933	-0.13352	0.222426	0.12826	0.119867	-0.180958	0.122693	0.182995	0.0183595	-0.221163	0.0226116	0.221341	-0.0825252	-0.257926	-0.0766329	0.256142	-0.184463	-0.291676	-0.17641	0.291097
90739_6w_G2_D.tif	0.339857	-0.00544318	-0.285773	-0.14419	-0.278789	0.134364	0.23191	-0.117561	0.238179	0.122178	0.124448	-0.174497	0.135032	0.182359	0.0173771	-0.215163	0.0282635	0.214408	-0.0910525	-0.243221	-0.0780838	0.243131	-0.198464	-0.277499	-0.182906	0.281133
90747_6w_G2_D.tif	0.355669	-0.0147835	-0.289593	-0.145292	-0.291413	0.152821	0.242769	-0.10689	0.245788	0.104383	0.131094	-0.158164	0.134732	0.158654	0.0210279	-0.20098	0.0242384	0.201902	-0.0890329	-0.238405	-0.086304	0.23974	-0.200971	-0.268167	-0.198003	0.275182
90755_6w_G2_D.tif	0.29199	-0.0125236	-0.249318	-0.155613	-0.246942	0.162424	0.197836	-0.136096	0.209501	0.148944	0.106632	-0.19851	0.116961	0.201696	0.0157374	-0.242207	0.0259291	0.243233	-0.0754304	-0.278123	-0.0667399	0.273494	-0.167253	-0.314222	-0.158903	0.307503
90757_6w_G2_D.tif	0.339314	-0.00658779	-0.276487	-0.167966	-0.27251	0.170326	0.232933	-0.118118	0.237259	0.121324	0.126	-0.17443	0.130734	0.170474	0.0172916	-0.207908	0.0239203	0.207197	-0.0901796	-0.241057	-0.0817801	0.243593	-0.197849	-0.274258	-0.188646	0.27741
90758_6w_G2_D.tif	0.324405	-0.00673013	-0.273953	-0.157424	-0.266948	0.135351	0.219058	-0.121961	0.22995	0.132968	0.115965	-0.179512	0.129839	0.186686	0.0137222	-0.220065	0.0289395	0.223798	-0.0883045	-0.253858	-0.0713608	0.2574	-0.190001	-0.290914	-0.171311	0.294261
90760_6w_G2_D.tif	0.325733	-0.00586143	-0.274589	-0.149206	-0.269076	0.14034	0.221889	-0.123638	0.229499	0.131796	0.119963	-0.186291	0.129164	0.187031	0.0159592	-0.220578	0.0266562	0.220367	-0.0870593	-0.25141	-0.0745147	0.253353	-0.188966	-0.288379	-0.174658	0.292477
90769_6w_G2_D.tif	0.32503	-0.0124104	-0.271539	-0.160844	-0.269535	0.150364	0.218435	-0.112727	0.229717	0.123022	0.118292	-0.178331	0.130195	0.183371	0.0167964	-0.221175	0.028692	0.224392	-0.0857893	-0.254398	-0.0742815	0.255889	-0.188997	-0.287778	-0.177014	0.290624
90772_6w_G2_D.tif	0.322898	-0.00939037	-0.268883	-0.145951	-0.269558	0.154655	0.222779	-0.126851	0.223396	0.123843	0.122384	-0.187136	0.122853	0.179573	0.0207912	-0.224164	0.0224768	0.221724	-0.0809022	-0.254492	-0.0773275	0.26033	-0.182316	-0.288112	-0.178592	0.295971
90774_6w_G2_D.tif	0.326009	-0.00874986	-0.275513	-0.129168	-0.273049	0.128999	0.224239	-0.131205	0.227002	0.129396	0.121038	-0.185241	0.126297	0.18602	0.0184462	-0.221982	0.0253069	0.225657	-0.0833074	-0.255111	-0.0755068	0.258442	-0.184877	-0.291619	-0.176085	0.294561
90782_6w_G2_D.tif	0.338558	-0.00234172	-0.280756	-0.15591	-0.273872	0.151496	0.232789	-0.122477	0.235889	0.124237	0.123965	-0.173326	0.130287	0.172627	0.0166895	-0.211598	0.0256039	0.211666	-0.0903423	-0.243722	-0.079151	0.244655	-0.196795	-0.278743	-0.182866	0.283439
90783_6w_G2_D.tif	0.312494	-0.0184833	-0.260037	-0.151413	-0.263836	0.152835	0.214151	-0.136892	0.221443	0.137978	0.11509	-0.186889	0.122755	0.192734	0.0178604	-0.226139	0.022685	0.227111	-0.0787174	-0.261802	-0.0737311	0.267272	-0.176695	-0.294382	-0.173461	0.29807
90793_6w_G2_D.tif	0.326162	-0.00518605	-0.274788	-0.147874	-0.265868	0.163911	0.222947	-0.116881	0.227248	0.124027	0.121393	-0.180923	0.12725	0.181179	0.0178234	-0.220285	0.0258978	0.219853	-0.0854562	-0.256427	-0.0756122	0.252286	-0.188495	-0.295654	-0.178503	0.281975
90796_6w_G2_D.tif	0.320907	-0.00341027	-0.27358	-0.138044	-0.264721	0.149851	0.220366	-0.126887	0.225034	0.134892	0.11916	-0.18626	0.124641	0.183285	0.017536	-0.225461	0.0261065	0.224394	-0.0836908	-0.261183	-0.0717464	0.261941	-0.185633	-0.29707	-0.17438	0.283952
90797_6w_G2_D.tif	0.337476	-0.00601338	-0.279527	-0.157894	-0.272926	0.160631	0.230213	-0.114264	0.235201	0.119087	0.123422	-0.170314	0.130676	0.172369	0.0172077	-0.211756	0.0257523	0.211275	-0.0891005	-0.247438	-0.0785778	0.247119	-0.195723	-0.283198	-0.184096	0.280396
90804_6w_G2_D.tif	0.337162	-0.00273801	-0.281568	-0.16629	-0.27166	0.147144	0.227583	-0.110298	0.236558	0.119739	0.120488	-0.168724	0.133195	0.174137	0.0134472	-0.208977	0.029199	0.21375	-0.0928279	-0.245996	-0.0742115	0.250226	-0.198746	-0.285942	-0.178618	0.283967
90808_6w_G2_D.tif	0.329754	-0.00606517	-0.271351	-0.166999	-0.263324	0.17829	0.225583	-0.119064	0.231429	0.126406	0.120929	-0.175117	0.128572	0.17805	0.0163007	-0.21531	0.0248065	0.214163	-0.0878895	-0.252214	-0.0794438	0.2441	-0.192987	-0.286192	-0.18238	0.279952
90810_6w_G2_D.tif	0.33964	-4.65525e-05	-0.279869	-0.173905	-0.265851	0.179791	0.230383	-0.107271	0.23945	0.123446	0.123244	-0.168731	0.133784	0.171182	0.0145495	-0.209566	0.0269297	0.20439	-0.0947155	-0.244543	-0.0781194	0.240027	-0.20341	-0.282367	-0.186016	0.267594
90818_6w_G2_D.tif	0.34696	-0.0115472	-0.284455	-0.16469	-0.285081	0.129606	0.238095	-0.123524	0.243163	0.117608	0.12699	-0.169713	0.136381	0.174771	0.0169712	-0.202986	0.0278646	0.213399	-0.0931457	-0.229973	-0.0810514	0.245811	-0.203046	-0.260053	-0.189647	0.281291
90819_6w_G2_D.tif	0.319038	-0.0156497	-0.259057	-0.158402	-0.261889	0.191942	0.224166	-0.131803	0.217378	0.11728	0.124834	-0.18581	0.118633	0.17948	0.0248801	-0.224911	0.0176581	0.221289	-0.0766131	-0.255365	-0.0837532	0.2572	-0.178492	-0.285917	-0.186783	0.290667
90822_6w_G2_D.tif	0.319292	-0.00635209	-0.272753	-0.150512	-0.265431	0.126016	0.218449	-0.13351	0.226507	0.139023	0.115352	-0.183649	0.128392	0.193242	0.0153289	-0.226757	0.0297178	0.232181	-0.0860384	-0.257824	-0.0698401	0.262108	-0.188862	-0.286165	-0.170114	0.292198
90826_6w_G2_D.tif	0.318707	-0.0158059	-0.252465	-0.177684	-0.249881	0.217117	0.22187	-0.126787	0.2193	0.120491	0.122188	-0.181363	0.116104	0.172157	0.0215909	-0.22031	0.0167127	0.219042	-0.0792809	-0.256154	-0.085474	0.254321	-0.180266	-0.292032	-0.189105	0.287008
90836_6w_G2_D.tif	0.325602	-0.0125175	-0.27015	-0.173008	-0.268056	0.144377	0.218602	-0.118862	0.232228	0.129311	0.11545	-0.174407	0.131342	0.184312	0.0136037	-0.216334	0.0293572	0.223156	-0.0884127	-0.251684	-0.0723477	0.258631	-0.191918	-0.284131	-0.175301	0.291155
90842_6w_G2_D.tif	0.337383	-0.0120474	-0.279277	-0.174391	-0.276249	0.125407	0.225897	-0.117524	0.242058	0.129741	0.118059	-0.16983	0.138395	0.18532	0.0119556	-0.209391	0.0316825	0.217321	-0.0946688	-0.239908	-0.0742234	0.249117	-0.201814	-0.270566	-0.179198	0.286751
90848_6w_G2_D.tif	0.303327	-0.00342365	-0.250801	-0.202251	-0.24401	0.165022	0.206969	-0.132577	0.2176	0.142051	0.107645	-0.186546	0.124251	0.196441	0.00926325	-0.225393	0.0299409	0.236547	-0.088631	-0.260364	-0.0663995	0.266395	-0.187105	-0.295548	-0.16205	0.299646
90851_6w_G2_D.tif	0.315019	-0.0138944	-0.263985	-0.1678	-0.26381	0.140803	0.213669	-0.128259	0.223748	0.132093	0.11506	-0.187093	0.126591	0.190672	0.0149974	-0.222404	0.0300298	0.238792	-0.084616	-0.254167	-0.0712332	0.264306	-0.184244	-0.289341	-0.171227	0.296292
90854_6w_G2_D.tif	0.327138	-0.0098371	-0.270478	-0.16505	-0.265741	0.163914	0.223994	-0.125502	0.230843	0.129995	0.119547	-0.177223	0.128618	0.182112	0.0156515	-0.214514	0.0260717	0.220008	-0.0870615	-0.251492	-0.0770036	0.250905	-0.191076	-0.285241	-0.180502	0.281926
90858_6w_G2_D.tif	0.335188	-0.00657877	-0.274703	-0.156546	-0.271074	0.173471	0.233181	-0.123013	0.229126	0.114686	0.126762	-0.174569	0.124935	0.169359	0.020998	-0.213397	0.0210991	0.211349	-0.0851758	-0.246044	-0.0820698	0.249996	-0.190874	-0.281714	-0.187393	0.283
90862_6w_G2_D.tif	0.335759	-0.00875849	-0.27471	-0.175846	-0.273525	0.163872	0.230436	-0.115419	0.234351	0.113857	0.126097	-0.175408	0.132283	0.174984	0.018918	-0.211446	0.0269447	0.215465	-0.0893855	-0.240783	-0.0797505	0.249275	-0.198919	-0.268194	-0.188499	0.2784
90863_6w_G2_D.tif	0.323333	-0.00244288	-0.272132	-0.16494	-0.262981	0.150838	0.219899	-0.124304	0.230937	0.139402	0.117589	-0.185017	0.130556	0.188404	0.0135226	-0.220628	0.0282201	0.218934	-0.0897141	-0.252807	-0.0723688	0.252147	-0.19334	-0.285093	-0.173521	0.285507
90864_6w_G2_D.tif	0.314618	-0.0115209	-0.264433	-0.168569	-0.258234	0.155497	0.212217	-0.125501	0.225711	0.138937	0.112332	-0.181883	0.127715	0.192378	0.0135041	-0.224584	0.0297835	0.232491	-0.0866235	-0.257622	-0.0702158	0.259944	-0.1858	-0.297069	-0.170573	0.287503
90867_6w_G2_D.tif	0.321018	-0.0106619	-0.269473	-0.169574	-0.264587	0.151651	0.216461	-0.117921	0.228724	0.128845	0.11639	-0.179932	0.130952	0.188916	0.0152549	-0.221943	0.0308317	0.229414	-0.0874746	-0.254251	-0.0718645	0.25716	-0.19104	-0.286785	-0.175192	0.285082
90870_6w_G2_D.tif	0.329579	-0.00624757	-0.275848	-0.15971	-0.269999	0.152397	0.224088	-0.114557	0.229854	0.118728	0.120345	-0.173459	0.129032	0.176702	0.0170424	-0.216957	0.0275085	0.219574	-0.0865303	-0.254411	-0.0744181	0.256442	-0.192147	-0.286282	-0.178506	0.287782
90875_6w_G2_D.tif	0.314429	-0.014756	-0.259629	-0.154781	-0.264757	0.15989	0.216982	-0.134122	0.219351	0.130038	0.118687	-0.189738	0.11959	0.183004	0.0205189	-0.227567	0.0218681	0.22814	-0.0778523	-0.258351	-0.0763241	0.266252	-0.176782	-0.289273	-0.176083	0.301265
90876_6w_G2_D.tif	0.349912	-0.00628526	-0.282454	-0.174426	-0.276159	0.17732	0.239157	-0.109558	0.243856	0.112905	0.12742	-0.160426	0.134509	0.162487	0.0170294	-0.201633	0.0256287	0.202716	-0.0938829	-0.236789	-0.0847293	0.234188	-0.205651	-0.269085	-0.194636	0.268587
90880_6w_G2_D.tif	0.337271	-0.00355803	-0.279511	-0.156847	-0.271512	0.168793	0.232726	-0.118339	0.234138	0.119652	0.125842	-0.173399	0.129819	0.172259	0.0186265	-0.212097	0.0250679	0.211346	-0.0883412	-0.24799	-0.0800037	0.245069	-0.196968	-0.278822	-0.187154	0.273932
90881_6w_G2_D.tif	0.338151	-0.0053345	-0.27743	-0.159273	-0.26971	0.179366	0.232579	-0.116947	0.236117	0.122949	0.126312	-0.174975	0.130091	0.172225	0.0189002	-0.213491	0.0234393	0.207366	-0.0895068	-0.243774	-0.0827749	0.239507	-0.196714	-0.279409	-0.189453	0.271789
90884_6w_G2_D.tif	0.303497	-0.00391856	-0.256365	-0.186383	-0.246799	0.160132	0.204453	-0.125146	0.216467	0.138613	0.106824	-0.183403	0.122861	0.192679	0.0117292	-0.230921	0.0301186	0.236745	-0.0856599	-0.266097	-0.0639804	0.271559	-0.182856	-0.304479	-0.16029	0.300619
90886_6w_G2_D.tif	0.320324	-0.000809504	-0.270881	-0.162764	-0.262155	0.149928	0.221487	-0.129664	0.22405	0.130501	0.118489	-0.183763	0.126379	0.186701	0.0159525	-0.221915	0.0270434	0.22448	-0.0859973	-0.256738	-0.0720223	0.25904	-0.190099	-0.285846	-0.17257	0.290851
90893_6w_G2_D.tif	0.325911	-0.00862439	-0.266956	-0.171436	-0.264414	0.173102	0.224273	-0.122566	0.226588	0.121378	0.121356	-0.178186	0.125556	0.17743	0.0183045	-0.217545	0.0234922	0.217613	-0.0852513	-0.250526	-0.0782666	0.254462	-0.189171	-0.283607	-0.181421	0.288506
90894_6w_G2_D.tif	0.336277	-0.0138751	-0.270981	-0.168021	-0.272993	0.17802	0.233024	-0.123215	0.23332	0.116476	0.128521	-0.179343	0.127425	0.169933	0.0201642	-0.206722	0.0223674	0.214143	-0.0860738	-0.239505	-0.0849122	0.247086	-0.192739	-0.272396	-0.1934	0.277418
90896_6w_G2_D.tif	0.335954	-0.0105329	-0.274675	-0.179546	-0.271826	0.161459	0.225959	-0.108921	0.237625	0.118206	0.120669	-0.167837	0.134626	0.176313	0.0153454	-0.210871	0.0285658	0.213399	-0.0912946	-0.244741	-0.0775588	0.247373	-0.199211	-0.275789	-0.184179	0.281487
90897_6w_G2_D.tif	0.331632	-0.00875244	-0.272463	-0.163378	-0.269816	0.169949	0.229175	-0.121769	0.229673	0.117967	0.124922	-0.1774	0.127329	0.175073	0.020017	-0.215847	0.0243616	0.21784	-0.0861032	-0.245931	-0.0806198	0.24959	-0.191968	-0.278841	-0.186139	0.2815
90904_6w_G2_D.tif	0.333151	-0.00460413	-0.274106	-0.167582	-0.26873	0.168536	0.228311	-0.116628	0.231738	0.119502	0.12359	-0.175727	0.128242	0.172022	0.0171945	-0.212145	0.0243995	0.211517	-0.087946	-0.248222	-0.0783255	0.250687	-0.194225	-0.281303	-0.183293	0.283945
90906_6w_G2_D.tif	0.336509	0.00566773	-0.281376	-0.174785	-0.265964	0.170409	0.229571	-0.10764	0.236166	0.120298	0.1233	-0.170809	0.133899	0.172646	0.0155988	-0.214434	0.0303265	0.212129	-0.0939567	-0.248623	-0.0754325	0.242307	-0.205738	-0.276817	-0.182902	0.269652
90908_6w_G2_D.tif	0.327795	-0.00782674	-0.271832	-0.172359	-0.267413	0.157336	0.222671	-0.116529	0.230221	0.121195	0.119365	-0.174631	0.130193	0.180346	0.0164556	-0.217893	0.0285261	0.222322	-0.0883029	-0.24989	-0.0752416	0.253136	-0.193611	-0.282039	-0.178826	0.286833
90912_6w_G2_D.tif	0.339118	-0.0143694	-0.275823	-0.160704	-0.275168	0.171007	0.232714	-0.117695	0.234935	0.113578	0.124803	-0.165216	0.129282	0.169758	0.0195675	-0.208968	0.0239598	0.213279	-0.0861357	-0.246593	-0.0833856	0.244862	-0.193555	-0.278395	-0.190313	0.279455
90915_6w_G2_D.tif	0.301656	-0.00501097	-0.245696	-0.196159	-0.238685	0.191911	0.206978	-0.130902	0.211343	0.135201	0.109323	-0.186687	0.115899	0.186856	0.0125778	-0.227462	0.0234899	0.232685	-0.0831636	-0.265602	-0.0710474	0.267224	-0.178024	-0.306803	-0.164652	0.30475
90917_6w_G2_D.tif	0.329648	-0.00318344	-0.27221	-0.171197	-0.266893	0.165241	0.227189	-0.120431	0.228923	0.119901	0.122448	-0.176059	0.127515	0.174867	0.0184651	-0.218367	0.0255992	0.216965	-0.0877399	-0.248196	-0.0771574	0.252797	-0.194368	-0.278144	-0.181419	0.285805
90918_6w_G2_D.tif	0.312058	-0.00970185	-0.257567	-0.165332	-0.251944	0.189489	0.213977	-0.125502	0.21818	0.131084	0.115638	-0.183114	0.118873	0.181902	0.0186597	-0.229419	0.0218518	0.22453	-0.0799212	-0.265263	-0.0758079	0.260038	-0.178821	-0.301198	-0.175175	0.292486
90922_6w_G2_D.tif	0.303152	-0.0119778	-0.255855	-0.154307	-0.254662	0.16767	0.208245	-0.131283	0.212209	0.133222	0.113677	-0.191438	0.118923	0.194141	0.0196148	-0.236701	0.0234979	0.233614	-0.0759158	-0.271321	-0.0715071	0.269243	-0.172981	-0.302674	-0.168398	0.301811
90935_6w_G2_D.tif	0.332279	-0.0128675	-0.275093	-0.159287	-0.275999	0.149705	0.226316	-0.116099	0.232729	0.117529	0.123161	-0.175876	0.131287	0.179472	0.0198756	-0.219251	0.0269097	0.219241	-0.0861401	-0.246876	-0.078302	0.252672	-0.19279	-0.274656	-0.184232	0.286294
90936_6w_G2_D.tif	0.307334	-0.00713031	-0.260574	-0.150925	-0.25687	0.157557	0.210389	-0.131792	0.217142	0.140313	0.113865	-0.192144	0.120022	0.189348	0.0177141	-0.234581	0.0247468	0.2306	-0.0785909	-0.269942	-0.0701576	0.268143	-0.177201	-0.298808	-0.167821	0.299362
90950_6w_G2_D.tif	0.306028	-0.0100875	-0.258311	-0.164016	-0.256579	0.157166	0.209818	-0.13245	0.2167	0.136688	0.113621	-0.19079	0.121735	0.192429	0.0181648	-0.234692	0.0272817	0.23728	-0.0797534	-0.265102	-0.0700438	0.268774	-0.179454	-0.292469	-0.169209	0.297269
90960_6w_G2_D.tif	0.308968	-0.00887078	-0.258415	-0.178649	-0.254954	0.155907	0.210216	-0.130435	0.220682	0.138726	0.112071	-0.187644	0.124762	0.192962	0.0139465	-0.227032	0.0282784	0.233182	-0.0846887	-0.259456	-0.0690116	0.266563	-0.184072	-0.292107	-0.167782	0.296854
90961_6w_G2_D.tif	0.327193	-0.0028043	-0.273913	-0.153272	-0.262737	0.175197	0.225742	-0.121349	0.227316	0.125656	0.122197	-0.179261	0.126611	0.18034	0.0179324	-0.219012	0.0245335	0.216939	-0.0860897	-0.255642	-0.0777609	0.247438	-0.190392	-0.292343	-0.180631	0.278112
90967_6w_G2_D.tif	0.345559	-0.00892298	-0.28694	-0.136067	-0.283447	0.147	0.236462	-0.114038	0.239763	0.115309	0.127221	-0.166709	0.132954	0.170532	0.0200786	-0.212365	0.0255282	0.209436	-0.0884155	-0.245225	-0.0820706	0.2418	-0.197214	-0.278148	-0.189481	0.277398
90968_6w_G2_D.tif	0.301902	-0.00772875	-0.256703	-0.158044	-0.252644	0.157165	0.208432	-0.138094	0.212079	0.139667	0.112107	-0.192857	0.117733	0.193105	0.0176699	-0.236144	0.0254162	0.238523	-0.0781233	-0.268926	-0.0683497	0.273418	-0.174711	-0.301927	-0.164808	0.301842
90977_6w_G2_D.tif	0.323332	-0.00694923	-0.269484	-0.172251	-0.26313	0.156033	0.217858	-0.117689	0.229666	0.130247	0.116117	-0.178502	0.129083	0.181941	0.0131768	-0.21687	0.0290858	0.223743	-0.0882981	-0.254819	-0.0722457	0.256213	-0.191142	-0.289901	-0.174019	0.288805
90982_6w_G2_D.tif	0.325573	-0.00614976	-0.268655	-0.178297	-0.265566	0.157237	0.2204	-0.117088	0.229958	0.125407	0.118335	-0.178121	0.128717	0.177349	0.014908	-0.216704	0.0276534	0.219491	-0.0879228	-0.251847	-0.0734792	0.258403	-0.19305	-0.281136	-0.17687	0.291457
90985_6w_G2_D.tif	0.318588	-0.0027786	-0.268278	-0.163781	-0.259746	0.158869	0.218206	-0.125985	0.22435	0.133502	0.11687	-0.183774	0.124803	0.182299	0.0151025	-0.221987	0.0276536	0.227091	-0.0853104	-0.259815	-0.0717044	0.259344	-0.187973	-0.291713	-0.172561	0.28873
90999_6w_G2_D2.tif	0.317785	-0.00965336	-0.265427	-0.145415	-0.261975	0.165454	0.219626	-0.134289	0.223001	0.136889	0.119422	-0.190246	0.123041	0.188939	0.0187587	-0.226563	0.0227109	0.224534	-0.0819924	-0.256319	-0.0776037	0.253503	-0.180842	-0.295479	-0.176505	0.288646
91003_6w_G2_D.tif	0.338151	-0.00946446	-0.282552	-0.134779	-0.282122	0.130519	0.232029	-0.120592	0.234498	0.117416	0.126239	-0.178093	0.130255	0.175053	0.020283	-0.216126	0.0260462	0.219365	-0.0861001	-0.245467	-0.0794597	0.252114	-0.192387	-0.277921	-0.184879	0.287976
91005_6w_G2_D.tif	0.360567	-0.0128488	-0.296951	-0.134744	-0.296722	0.128098	0.246184	-0.109813	0.250253	0.106616	0.13239	-0.160307	0.139664	0.167071	0.019508	-0.197775	0.026023	0.200169	-0.092578	-0.23251	-0.0858555	0.235373	-0.205366	-0.26484	-0.197116	0.27551
91013_6w_G2_D.tif	0.347843	-0.00514554	-0.277558	-0.181982	-0.273628	0.182713	0.239113	-0.113368	0.242412	0.115459	0.129313	-0.168871	0.132288	0.161146	0.0172293	-0.201479	0.0232995	0.200599	-0.0945068	-0.231041	-0.0855842	0.237082	-0.204736	-0.266056	-0.195484	0.270942
91018_6w_G2_D2.tif	0.339969	-0.00712093	-0.281384	-0.148695	-0.275729	0.171023	0.232754	-0.108579	0.235436	0.113159	0.12816	-0.174348	0.130473	0.168701	0.020932	-0.21446	0.0255435	0.212438	-0.0875256	-0.246102	-0.0822208	0.242281	-0.195772	-0.28061	-0.190637	0.272313
91025_6w_G2_D.tif	0.315589	-0.0126965	-0.262241	-0.153221	-0.265511	0.15773	0.218615	-0.134005	0.219766	0.128834	0.120039	-0.190375	0.120676	0.18344	0.0209911	-0.227658	0.0232292	0.229884	-0.078664	-0.257416	-0.0759987	0.265414	-0.179222	-0.286509	-0.177268	0.296578
91027_6w_G2_D.tif	0.330991	-0.0140871	-0.268238	-0.174134	-0.268371	0.172133	0.225857	-0.11964	0.231634	0.119904	0.121078	-0.171821	0.128154	0.175283	0.0177402	-0.213626	0.0245689	0.217377	-0.0869307	-0.2458	-0.0804866	0.249944	-0.191101	-0.281169	-0.184895	0.285637
91028_6w_G2_D.tif	0.321525	-0.00805994	-0.27059	-0.176623	-0.26383	0.125248	0.215197	-0.124924	0.232332	0.141516	0.111812	-0.179511	0.132894	0.192226	0.00957897	-0.217609	0.0323436	0.227361	-0.0916024	-0.252167	-0.0672892	0.262255	-0.194357	-0.283965	-0.168014	0.294252
91031_6w_G2_D.tif	0.331904	-0.00732059	-0.277518	-0.155555	-0.271437	0.146385	0.226229	-0.121205	0.233427	0.127409	0.120605	-0.175112	0.130262	0.179034	0.0162507	-0.216079	0.0272723	0.218116	-0.0889454	-0.247798	-0.0750901	0.253911	-0.193398	-0.284937	-0.179561	0.283152
91039_6w_G2_D.tif	0.330648	-0.00470301	-0.276343	-0.139038	-0.272941	0.153839	0.228825	-0.125234	0.228231	0.122541	0.124875	-0.182526	0.1255	0.175644	0.0204528	-0.219817	0.0236794	0.218373	-0.0833669	-0.253618	-0.0792644	0.251297	-0.188218	-0.284307	-0.182077	0.287548
91045_6w_G2_D.tif	0.328157	-0.00921884	-0.270517	-0.167463	-0.267581	0.166225	0.224586	-0.120014	0.229852	0.122545	0.121519	-0.177412	0.128329	0.178319	0.0182043	-0.218236	0.026368	0.220841	-0.0865397	-0.249457	-0.078191	0.250756	-0.191756	-0.280803	-0.182431	0.283919
91046_6w_G2_D.tif	0.314193	-0.0191651	-0.259141	-0.165	-0.262205	0.154077	0.212964	-0.131476	0.22244	0.133705	0.112582	-0.18039	0.122821	0.187774	0.0152148	-0.221477	0.0248347	0.230852	-0.0814945	-0.258029	-0.0732887	0.265918	-0.17769	-0.298799	-0.171231	0.30201
91047_6w_G2_D.tif	0.317154	-0.0142489	-0.256041	-0.191661	-0.25504	0.18251	0.214081	-0.120733	0.225598	0.128301	0.113565	-0.175413	0.125089	0.18063	0.0146766	-0.219827	0.0270427	0.227724	-0.0859562	-0.255039	-0.0751017	0.258934	-0.187176	-0.290434	-0.177892	0.289259
91049_6w_G2_D.tif	0.323472	-0.00950661	-0.264381	-0.168903	-0.261023	0.182171	0.221009	-0.119225	0.225268	0.122815	0.120032	-0.179511	0.123409	0.175345	0.017901	-0.21911	0.0234244	0.220209	-0.0838187	-0.255095	-0.0792738	0.251886	-0.185713	-0.291128	-0.180305	0.290053
91051_6w_G2_D.tif	0.33542	-0.00827113	-0.269844	-0.182155	-0.266887	0.181305	0.231792	-0.119722	0.231695	0.114305	0.124699	-0.17076	0.128375	0.172102	0.0182809	-0.209907	0.0225558	0.210116	-0.0896848	-0.23986	-0.082324	0.246935	-0.196044	-0.276065	-0.188036	0.281977
91052_6w_G2_D.tif	0.321691	-0.00756617	-0.2708	-0.168802	-0.263194	0.148306	0.215838	-0.117715	0.230012	0.133431	0.113955	-0.176629	0.130673	0.186656	0.0133148	-0.221836	0.0309492	0.226665	-0.088462	-0.257349	-0.0702282	0.257098	-0.191748	-0.289947	-0.172	0.287689
91056_6w_G2_D.tif	0.319602	-0.0102114	-0.267832	-0.171979	-0.262691	0.15283	0.216109	-0.121126	0.227297	0.129881	0.114531	-0.176557	0.129604	0.188563	0.0147124	-0.221792	0.0300241	0.228649	-0.0865074	-0.257735	-0.0710534	0.259601	-0.190178	-0.287913	-0.173618	0.28779
91065_6w_G2_D.tif	0.325151	-0.00472238	-0.269333	-0.178721	-0.259455	0.169445	0.219781	-0.115091	0.228971	0.125959	0.115979	-0.172049	0.128258	0.17882	0.0133008	-0.215938	0.0275576	0.218888	-0.0898559	-0.253403	-0.07263	0.255517	-0.192564	-0.294016	-0.175161	0.285309
91067_6w_G2_D.tif	0.313107	-0.0151111	-0.260574	-0.154329	-0.262651	0.163475	0.215329	-0.132157	0.220555	0.13254	0.117868	-0.19052	0.123452	0.191811	0.0186814	-0.225216	0.0234392	0.227841	-0.0785488	-0.262849	-0.0761708	0.260284	-0.178675	-0.290893	-0.175812	0.295126
91072_6w_G2_D.tif	0.356498	-0.00570993	-0.292632	-0.136596	-0.288938	0.148858	0.2465	-0.120283	0.246162	0.116028	0.132309	-0.164778	0.133519	0.160098	0.020289	-0.20202	0.0233061	0.200107	-0.0917322	-0.232518	-0.0860999	0.236515	-0.202599	-0.269503	-0.196581	0.269802
91075_6w_G2_D.tif	0.339941	-0.00473898	-0.282187	-0.142126	-0.276364	0.165369	0.234783	-0.115968	0.234053	0.11541	0.128438	-0.174773	0.129005	0.169943	0.0213916	-0.215154	0.0233201	0.209093	-0.0867196	-0.246489	-0.081865	0.244989	-0.194522	-0.280847	-0.189274	0.275292
91091_6w_G2_D.tif	0.340125	-0.00801081	-0.279149	-0.161071	-0.279022	0.145623	0.234071	-0.121245	0.235386	0.114421	0.126672	-0.1754	0.130429	0.171189	0.0183191	-0.207923	0.0254268	0.215452	-0.0892647	-0.237126	-0.0812551	0.247643	-0.195676	-0.272277	-0.186062	0.288725
91092_6w_G2_D.tif	0.326208	-0.00480192	-0.272493	-0.179726	-0.260827	0.154181	0.219666	-0.118481	0.23287	0.133096	0.114541	-0.173351	0.13262	0.186556	0.00945162	-0.210701	0.0304277	0.220414	-0.09344	-0.250309	-0.0703162	0.253867	-0.196069	-0.292754	-0.17264	0.282009
91093_6w_G2_D.tif	0.334434	-0.000549366	-0.278978	-0.169456	-0.268274	0.157185	0.227575	-0.115515	0.2363	0.126761	0.121409	-0.174653	0.133589	0.178593	0.0140358	-0.212503	0.0295936	0.215426	-0.0928023	-0.247113	-0.0758216	0.243439	-0.200754	-0.278946	-0.180306	0.277331
91094_6w_G2_D.tif	0.341358	-0.00873847	-0.275342	-0.166252	-0.273229	0.17975	0.235336	-0.118063	0.236616	0.1168	0.127747	-0.172166	0.128991	0.166848	0.0196519	-0.208836	0.0214915	0.205104	-0.0886293	-0.2397	-0.0855846	0.240292	-0.196213	-0.273311	-0.192194	0.278271
91101_6w_G2_D.tif	0.350801	-0.0119533	-0.2872	-0.147635	-0.285468	0.15761	0.239149	-0.110344	0.245211	0.115304	0.129108	-0.164914	0.135019	0.165074	0.0194454	-0.204934	0.0250187	0.203119	-0.0903373	-0.239198	-0.084501	0.238114	-0.201011	-0.270772	-0.195234	0.270529
91103_6w_G2_D.tif	0.349535	-0.0129197	-0.28481	-0.15489	-0.282617	0.168085	0.239865	-0.110933	0.241743	0.108038	0.129965	-0.163349	0.13438	0.167795	0.0203764	-0.203525	0.0239254	0.204058	-0.0897611	-0.23775	-0.086031	0.237122	-0.200169	-0.272036	-0.196402	0.270306
91107_6w_G2_D.tif	0.340517	0.000793057	-0.280383	-0.160868	-0.268231	0.178086	0.234544	-0.117922	0.237296	0.125074	0.124634	-0.168705	0.129395	0.166738	0.0166069	-0.209995	0.0240455	0.204642	-0.0908405	-0.248133	-0.0808156	0.239403	-0.199765	-0.280667	-0.187003	0.271555
91108_6w_G2_D.tif	0.321541	-0.0074287	-0.265174	-0.166606	-0.260023	0.179244	0.220814	-0.121532	0.223292	0.123523	0.119434	-0.178966	0.122992	0.177544	0.0187208	-0.222844	0.0236404	0.221135	-0.0833766	-0.257074	-0.0772855	0.255118	-0.1858	-0.291394	-0.178774	0.289282
91112_6w_G2_D.tif	0.306332	-0.0109203	-0.252857	-0.172542	-0.251088	0.179257	0.212101	-0.138153	0.216708	0.139307	0.113104	-0.18673	0.118994	0.189054	0.0175336	-0.230443	0.023119	0.230476	-0.0788143	-0.266766	-0.073785	0.264608	-0.178733	-0.292737	-0.172612	0.295589
91113_6w_G2_D.tif	0.313827	-0.0130113	-0.259361	-0.186344	-0.258867	0.152799	0.210085	-0.123086	0.225798	0.134807	0.110881	-0.180643	0.128565	0.191003	0.0119739	-0.221088	0.0298945	0.230775	-0.0863406	-0.257942	-0.0696095	0.264058	-0.187264	-0.288806	-0.169583	0.297477
91115_6w_G2_D.tif	0.359547	-0.00427917	-0.292521	-0.148313	-0.28914	0.158341	0.248792	-0.114845	0.246639	0.107902	0.133728	-0.160713	0.133663	0.154528	0.0210557	-0.20052	0.0230725	0.197749	-0.0926093	-0.229642	-0.088098	0.232953	-0.205146	-0.263957	-0.198982	0.270796
91122_6w_G2_D.tif	0.326569	-0.00494412	-0.27487	-0.151218	-0.266763	0.160594	0.223489	-0.119294	0.228508	0.125804	0.120632	-0.178459	0.128459	0.182318	0.0178096	-0.221408	0.0266571	0.219825	-0.0854354	-0.257981	-0.0756652	0.250979	-0.190632	-0.288562	-0.178757	0.282347
91127_6w_G2_D.tif	0.339232	-0.00785188	-0.283015	-0.158515	-0.277142	0.145395	0.229413	-0.111992	0.240509	0.123507	0.12355	-0.173749	0.136411	0.178787	0.0159814	-0.211898	0.0304249	0.216511	-0.0918739	-0.244109	-0.0776246	0.242748	-0.200952	-0.273621	-0.184913	0.274788
91130_6w_G2_D.tif	0.314824	-0.00277874	-0.266726	-0.14554	-0.258507	0.170178	0.218702	-0.127562	0.216604	0.126583	0.120407	-0.190811	0.121532	0.188958	0.0203501	-0.230886	0.0229868	0.225449	-0.0806226	-0.26234	-0.0756596	0.255979	-0.180532	-0.299419	-0.173359	0.292192
91131_6w_G2_D.tif	0.324908	-0.00511434	-0.276463	-0.163588	-0.265435	0.147308	0.219196	-0.115493	0.232485	0.132098	0.117785	-0.180259	0.134507	0.191627	0.0140044	-0.220303	0.0320215	0.223888	-0.0904856	-0.254196	-0.07054	0.252997	-0.196597	-0.285357	-0.175387	0.276391
91132_6w_G2_D.tif	0.346394	-9.63745e-05	-0.288255	-0.154049	-0.277862	0.158917	0.236529	-0.107847	0.240887	0.114942	0.127348	-0.167388	0.134025	0.165704	0.0180112	-0.210032	0.0278032	0.207859	-0.0928316	-0.241768	-0.0801093	0.239236	-0.203335	-0.276239	-0.188605	0.270762
91135_6w_G2_D.tif	0.326819	-0.0100603	-0.273335	-0.135934	-0.272099	0.149832	0.225546	-0.128506	0.226513	0.125405	0.122015	-0.1802	0.12495	0.180973	0.0201976	-0.221905	0.0232325	0.220539	-0.0816444	-0.257218	-0.0776533	0.256668	-0.184578	-0.289575	-0.179963	0.289981
91144_6w_G2_D.tif	0.348222	-0.00391128	-0.287448	-0.159594	-0.278224	0.162658	0.239106	-0.112207	0.241722	0.112977	0.128336	-0.165788	0.1359	0.171563	0.0169347	-0.20213	0.0265113	0.205006	-0.0935241	-0.238228	-0.0823884	0.23541	-0.204186	-0.274378	-0.190961	0.268621
91145_6w_G2_D.tif	0.312002	-0.00594872	-0.260135	-0.176864	-0.251259	0.166626	0.212034	-0.128986	0.220984	0.137981	0.109499	-0.177828	0.123405	0.189276	0.0113077	-0.221906	0.0262531	0.226901	-0.084993	-0.265399	-0.0700298	0.260871	-0.183397	-0.302735	-0.165671	0.298011
91153_6w_G2_D.tif	0.332371	-0.00881078	-0.282902	-0.144505	-0.275758	0.110927	0.223924	-0.118618	0.236118	0.129162	0.119521	-0.179976	0.135537	0.191423	0.0143955	-0.217844	0.0315401	0.225042	-0.0905248	-0.249159	-0.0727565	0.252217	-0.196026	-0.280607	-0.175439	0.290749
91155_6w_G2_D.tif	0.31392	-0.010916	-0.264714	-0.154042	-0.263471	0.150502	0.215351	-0.129608	0.220597	0.131123	0.116904	-0.187521	0.123897	0.189568	0.0185435	-0.228548	0.0262556	0.231373	-0.0804619	-0.262154	-0.0722072	0.265729	-0.18164	-0.29043	-0.172974	0.294925
91160_6w_G2_D.tif	0.296748	-0.0157922	-0.247779	-0.18231	-0.250833	0.153918	0.201095	-0.1375	0.214432	0.144769	0.106885	-0.192713	0.121942	0.202182	0.0139418	-0.233608	0.0272625	0.239705	-0.0793664	-0.267685	-0.0663229	0.276836	-0.175538	-0.295762	-0.162467	0.307959
91166_6w_G2_D.tif	0.333334	-0.0107536	-0.275273	-0.141459	-0.276509	0.148209	0.229498	-0.127722	0.231909	0.125936	0.124473	-0.180949	0.125842	0.172615	0.0197064	-0.215844	0.0233603	0.218307	-0.0841571	-0.247493	-0.0804746	0.25221	-0.187722	-0.282117	-0.183987	0.289061
91168_6w_G2_D.tif	0.330203	-0.0188933	-0.269808	-0.16131	-0.271362	0.166068	0.22369	-0.119963	0.234665	0.127258	0.120046	-0.173305	0.129723	0.178355	0.017262	-0.213898	0.0258939	0.219623	-0.0851578	-0.251267	-0.0800795	0.248919	-0.189466	-0.282823	-0.185609	0.281235
91170_6w_G2_D.tif	0.320499	-0.00769253	-0.266035	-0.161514	-0.263292	0.165888	0.22084	-0.125717	0.222658	0.125301	0.120402	-0.184573	0.122713	0.179385	0.0192438	-0.223841	0.0237085	0.223236	-0.0831286	-0.253544	-0.0757263	0.260591	-0.184406	-0.289543	-0.177477	0.292023
91174_6w_G2_D.tif	0.331542	-0.00732141	-0.277631	-0.128768	-0.274558	0.153978	0.227959	-0.120869	0.230083	0.124479	0.124368	-0.180121	0.126476	0.17621	0.0217296	-0.226404	0.0240487	0.217927	-0.0834386	-0.254104	-0.0793395	0.250243	-0.187795	-0.288	-0.183445	0.282751
91176_6w_G2_D.tif	0.355631	-0.00566792	-0.292214	-0.139452	-0.289294	0.161104	0.245309	-0.106965	0.244256	0.104524	0.136132	-0.172988	0.13495	0.161449	0.0222744	-0.202336	0.0240721	0.201277	-0.0902665	-0.234273	-0.0879414	0.232664	-0.20305	-0.266264	-0.199859	0.266927
91179_6w_G2_D.tif	0.351539	-0.0113279	-0.290622	-0.135106	-0.289849	0.134802	0.24137	-0.120904	0.246413	0.12193	0.130456	-0.172052	0.136923	0.173579	0.0198133	-0.207185	0.0260409	0.206916	-0.0911675	-0.234426	-0.0842975	0.237449	-0.202032	-0.26429	-0.194587	0.270616
91180_6w_G2_D.tif	0.342515	-0.010308	-0.280964	-0.152347	-0.279731	0.162096	0.234728	-0.113105	0.237277	0.112915	0.127796	-0.170415	0.131	0.168373	0.0205938	-0.210819	0.0235715	0.207149	-0.0874128	-0.242928	-0.0826773	0.245587	-0.195769	-0.275119	-0.190926	0.278922
91182_6w_G2_D.tif	0.334816	-0.00813139	-0.275121	-0.174927	-0.267397	0.165172	0.227362	-0.117664	0.236692	0.125781	0.119422	-0.167433	0.132304	0.176625	0.0132276	-0.207262	0.0279073	0.214894	-0.0918067	-0.246768	-0.0767851	0.246963	-0.198045	-0.283456	-0.182575	0.276207
91184_6w_G2_D.tif	0.30583	-0.0158689	-0.246983	-0.187931	-0.249055	0.19317	0.212442	-0.133717	0.213552	0.126834	0.116571	-0.189287	0.118557	0.187902	0.018812	-0.225554	0.0223383	0.232905	-0.0792889	-0.258603	-0.0769525	0.265878	-0.178053	-0.291862	-0.17777	0.296135
91186_6w_G2_D.tif	0.323813	-0.0164627	-0.261337	-0.188338	-0.267115	0.154746	0.218355	-0.122919	0.230362	0.126216	0.115884	-0.176252	0.129369	0.182853	0.0147411	-0.216134	0.0270444	0.223536	-0.0873672	-0.246519	-0.0760662	0.257915	-0.189941	-0.277043	-0.177742	0.2984
91190_6w_G2_D.tif	0.33123	-0.0134222	-0.268543	-0.171652	-0.272049	0.16388	0.225012	-0.118153	0.232979	0.121263	0.122079	-0.177571	0.129244	0.175527	0.0179546	-0.215096	0.0251621	0.21727	-0.0861804	-0.246277	-0.0814028	0.24713	-0.191279	-0.274543	-0.184207	0.291645
91194_6w_G2_D.tif	0.296838	-0.0154582	-0.233823	-0.213796	-0.234644	0.205075	0.198595	-0.126175	0.215811	0.139518	0.105543	-0.186295	0.119255	0.190495	0.0118274	-0.229355	0.0245086	0.233714	-0.0830878	-0.265958	-0.071538	0.270572	-0.178576	-0.302782	-0.17071	0.300445
91198_6w_G2_D.tif	0.308381	-0.0094171	-0.247609	-0.194185	-0.245641	0.192797	0.210196	-0.128898	0.220393	0.138631	0.113102	-0.188886	0.121155	0.186782	0.0138347	-0.225293	0.0222671	0.223756	-0.0847962	-0.258006	-0.0758027	0.259081	-0.182466	-0.293865	-0.173014	0.297503
91204_6w_G2_D.tif	0.327692	-0.0126863	-0.271808	-0.158035	-0.27202	0.148689	0.224003	-0.122021	0.227988	0.119125	0.121006	-0.177274	0.126631	0.177282	0.0181301	-0.21566	0.0262023	0.225072	-0.0843386	-0.250576	-0.0761755	0.259942	-0.187473	-0.285656	-0.179837	0.291799
91207_6w_G2_D.tif	0.324738	-0.014514	-0.260337	-0.18329	-0.259948	0.184263	0.223402	-0.127812	0.226929	0.123717	0.118023	-0.171992	0.124298	0.177268	0.0159343	-0.212021	0.0229965	0.220773	-0.0849568	-0.251701	-0.0805776	0.252267	-0.187759	-0.285548	-0.182742	0.288589
91212_6w_G2_D.tif	0.338107	-0.00573691	-0.267697	-0.19524	-0.258461	0.205483	0.232135	-0.112188	0.235516	0.116129	0.124043	-0.165318	0.129354	0.16653	0.0160711	-0.206412	0.0227058	0.20498	-0.0929914	-0.241852	-0.0839455	0.240399	-0.202085	-0.277302	-0.192751	0.270528
91213_6w_G2_D.tif	0.318713	-0.0164557	-0.252152	-0.191814	-0.257434	0.195181	0.218805	-0.121339	0.219692	0.113533	0.119295	-0.177226	0.120364	0.174281	0.0201053	-0.219983	0.0207436	0.221926	-0.080856	-0.253524	-0.0810141	0.26046	-0.183052	-0.284193	-0.183211	0.299155
91225_6w_G2_D.tif	0.313069	-0.0115389	-0.260451	-0.167455	-0.25574	0.175343	0.212709	-0.122719	0.22112	0.131369	0.115003	-0.183835	0.123787	0.188113	0.016595	-0.226192	0.0249273	0.226252	-0.0826197	-0.261194	-0.0735004	0.260421	-0.181399	-0.29986	-0.173501	0.291296
91238_6w_G2_D.tif	0.295111	-0.0103674	-0.241744	-0.196164	-0.236776	0.196511	0.203302	-0.133155	0.208726	0.136201	0.109374	-0.190346	0.117356	0.195441	0.0153108	-0.232831	0.0241045	0.23683	-0.0802334	-0.268481	-0.0703336	0.271261	-0.176457	-0.304374	-0.167741	0.299473
91247_6w_G2_D.tif	0.32928	-0.00919771	-0.270799	-0.166357	-0.269102	0.164957	0.227729	-0.126909	0.230474	0.124729	0.123245	-0.178946	0.128073	0.178482	0.0189244	-0.216496	0.0253519	0.219725	-0.0860709	-0.247727	-0.079229	0.25116	-0.192856	-0.274375	-0.185021	0.280953
91249_6w_G2_D.tif	0.341032	-0.0132412	-0.274848	-0.17	-0.275046	0.174718	0.231821	-0.110876	0.238141	0.114575	0.125765	-0.169387	0.130851	0.167149	0.0188721	-0.208962	0.0233671	0.207016	-0.0891391	-0.239251	-0.0837876	0.24359	-0.195812	-0.275578	-0.191217	0.280248
91251_6w_G2_D.tif	0.312782	-0.012452	-0.254856	-0.172204	-0.251766	0.195033	0.215579	-0.127658	0.217917	0.127541	0.116616	-0.182313	0.119895	0.184303	0.018614	-0.225241	0.0202785	0.222481	-0.0792345	-0.264309	-0.0790089	0.256698	-0.179202	-0.296367	-0.177615	0.29449
91254_6w_G2_D.tif	0.339774	-0.0129387	-0.269888	-0.176966	-0.268526	0.192859	0.234155	-0.118753	0.235968	0.115918	0.126399	-0.169205	0.129079	0.169556	0.0188559	-0.206437	0.0199234	0.204069	-0.0884128	-0.240304	-0.0878903	0.238126	-0.195524	-0.274129	-0.193915	0.278206
91255_6w_G2_D.tif	0.320061	-0.0114926	-0.260384	-0.179958	-0.258505	0.183543	0.216599	-0.115885	0.22458	0.122783	0.116365	-0.174809	0.123881	0.176384	0.0176785	-0.223007	0.0238683	0.219442	-0.0834869	-0.258242	-0.0760567	0.259033	-0.185979	-0.290445	-0.17862	0.292654
91256_6w_G2_D.tif	0.356554	-0.00927457	-0.289219	-0.166523	-0.285603	0.159917	0.241576	-0.102525	0.247906	0.105613	0.129071	-0.15665	0.137045	0.158065	0.0171234	-0.196914	0.0270255	0.202054	-0.0949179	-0.231719	-0.0844845	0.23552	-0.206532	-0.269153	-0.195544	0.27159
91262_6w_G2_D.tif	0.320473	-0.0109513	-0.259981	-0.181912	-0.259125	0.176056	0.218528	-0.125039	0.226814	0.13109	0.116784	-0.179455	0.124664	0.17971	0.0160755	-0.220318	0.0232623	0.218131	-0.0858923	-0.251623	-0.0759166	0.259141	-0.187354	-0.286088	-0.178333	0.291258
91265_6w_G2_D.tif	0.323643	-0.0144855	-0.260733	-0.172437	-0.257535	0.200513	0.225051	-0.126864	0.224903	0.122413	0.122915	-0.178792	0.123897	0.180241	0.0210317	-0.219811	0.020095	0.217315	-0.0830746	-0.250599	-0.0846477	0.247475	-0.186477	-0.284807	-0.18907	0.279838
91270_6w_G2_D.tif	0.299722	-0.022222	-0.24286	-0.187818	-0.246098	0.183416	0.201949	-0.133395	0.21555	0.139218	0.105749	-0.182725	0.119342	0.194885	0.0132646	-0.226992	0.0234088	0.235198	-0.0788729	-0.267312	-0.0716246	0.27135	-0.171581	-0.307813	-0.167947	0.304209
91271_6w_G2_D.tif	0.329244	-0.017889	-0.264701	-0.180358	-0.269703	0.170132	0.223868	-0.12074	0.232645	0.121466	0.120405	-0.173739	0.129617	0.178064	0.0175431	-0.213419	0.0252098	0.218793	-0.0858381	-0.246666	-0.0810575	0.250326	-0.191299	-0.273911	-0.185934	0.28794
91272_6w_G2_D.tif	0.338874	-0.00994392	-0.271656	-0.181991	-0.269835	0.183809	0.233638	-0.116164	0.233932	0.110132	0.125648	-0.166066	0.129004	0.166589	0.0189386	-0.207135	0.0239748	0.21153	-0.0886586	-0.242211	-0.0837433	0.244806	-0.19818	-0.271588	-0.191936	0.278233
91279_6w_G2_D.tif	0.315553	-0.0185274	-0.255158	-0.177608	-0.26192	0.18077	0.216291	-0.123461	0.219311	0.117505	0.118997	-0.182238	0.121633	0.180262	0.0207257	-0.223067	0.0227959	0.227195	-0.0782477	-0.258018	-0.0787723	0.26295	-0.180183	-0.284704	-0.181026	0.298942
90002_6w_G2_D.tif	0.30665	-0.0086056	-0.257975	-0.177961	-0.253255	0.154133	0.207902	-0.129978	0.219917	0.141375	0.111032	-0.189764	0.124888	0.195915	0.0135457	-0.229432	0.0286195	0.233936	-0.0852768	-0.259368	-0.0673757	0.26849	-0.183048	-0.295729	-0.165624	0.296988
90004_6w_G2_D.tif	0.322788	-0.0161959	-0.274084	-0.148323	-0.268818	0.11631	0.214192	-0.121533	0.232901	0.141764	0.111774	-0.177919	0.132402	0.194285	0.0114181	-0.220886	0.0314256	0.229643	-0.0888684	-0.255248	-0.0688061	0.260508	-0.18798	-0.297907	-0.168345	0.295502
90005_6w_G2_D.tif	0.341538	-0.0145689	-0.278585	-0.161375	-0.279442	0.149161	0.230911	-0.116722	0.241592	0.124156	0.123703	-0.172401	0.133636	0.173142	0.0156396	-0.205489	0.0263226	0.211737	-0.0907698	-0.238174	-0.0814473	0.242803	-0.196245	-0.275696	-0.186853	0.283428
90010_6w_G2_D.tif	0.322685	-0.00965174	-0.267836	-0.171118	-0.260565	0.163207	0.218311	-0.122944	0.229988	0.134567	0.115672	-0.179208	0.129629	0.18805	0.0121142	-0.214533	0.0281039	0.223993	-0.0890812	-0.252728	-0.0746713	0.249585	-0.189674	-0.294287	-0.174676	0.285067
90015_6w_G2_D.tif	0.343699	-0.0124621	-0.28606	-0.152729	-0.281437	0.129901	0.230883	-0.112686	0.243821	0.124323	0.12216	-0.167496	0.136536	0.174235	0.0135784	-0.203259	0.0300042	0.214453	-0.092886	-0.241685	-0.0764935	0.248344	-0.199895	-0.280235	-0.183911	0.279296
90022_6w_G2_D.tif	0.304274	-0.0193242	-0.25538	-0.172406	-0.25972	0.128163	0.204382	-0.134639	0.219087	0.141436	0.108426	-0.190044	0.124315	0.199201	0.0144405	-0.232281	0.0297333	0.244192	-0.0820466	-0.258542	-0.0666446	0.277049	-0.177444	-0.292817	-0.163424	0.310011
90026_6w_G2_D.tif	0.291957	-0.0149285	-0.243726	-0.199628	-0.243502	0.155324	0.193621	-0.131178	0.21428	0.147575	0.100351	-0.188034	0.123839	0.205599	0.0105029	-0.23663	0.0319927	0.246808	-0.0837404	-0.267742	-0.0612218	0.27986	-0.177551	-0.303874	-0.156802	0.306847
90029_6w_G2_D.tif	0.311583	-0.0174527	-0.257641	-0.162958	-0.262332	0.147558	0.21328	-0.13774	0.219282	0.134745	0.113601	-0.186242	0.121286	0.191071	0.0167205	-0.225492	0.0230875	0.230489	-0.0803061	-0.256311	-0.073164	0.269316	-0.175796	-0.295181	-0.1696	0.308197
90030_6w_G2_D.tif	0.304298	-0.0142052	-0.262573	-0.154573	-0.258354	0.112392	0.203712	-0.132555	0.219078	0.144906	0.107453	-0.191408	0.126495	0.207157	0.012116	-0.232114	0.031186	0.243258	-0.0823859	-0.268125	-0.0637968	0.274792	-0.178798	-0.300194	-0.15843	0.310669
90034_6w_G2_D.tif	0.299084	-0.0151918	-0.249331	-0.184128	-0.25147	0.150245	0.201255	-0.134243	0.216007	0.143673	0.106973	-0.192591	0.12266	0.200344	0.0125485	-0.23117	0.0283945	0.240815	-0.081952	-0.263174	-0.066354	0.274854	-0.176359	-0.298432	-0.161457	0.309
90035_6w_G2_D.tif	0.288424	-0.0171392	-0.244175	-0.171689	-0.245546	0.164604	0.194417	-0.133688	0.206544	0.141795	0.104851	-0.196014	0.117976	0.20589	0.0154458	-0.240732	0.0260289	0.244755	-0.0748127	-0.276965	-0.0655542	0.279064	-0.165898	-0.313447	-0.1577	0.313566
90042_6w_G2_D.tif	0.303032	-0.0219276	-0.24753	-0.182195	-0.256883	0.159359	0.205665	-0.133829	0.214046	0.129546	0.110331	-0.187735	0.120757	0.195622	0.016009	-0.226999	0.0247136	0.238539	-0.0779226	-0.261371	-0.0725252	0.272234	-0.17246	-0.295925	-0.167232	0.31468
90049_6w_G2_D.tif	0.288129	-0.0194744	-0.249115	-0.159536	-0.249311	0.133706	0.194015	-0.141974	0.209244	0.151859	0.102778	-0.197984	0.121216	0.216163	0.0133356	-0.241129	0.0299046	0.253095	-0.076602	-0.276251	-0.0618155	0.282047	-0.167675	-0.311682	-0.154105	0.311161
90056_6w_G2_D.tif	0.319901	-0.0170501	-0.262542	-0.179508	-0.264105	0.146015	0.213773	-0.125075	0.230331	0.137125	0.111556	-0.176682	0.128967	0.187451	0.0121302	-0.218271	0.0279593	0.225409	-0.0877987	-0.250802	-0.0715336	0.262925	-0.186721	-0.289175	-0.171917	0.297637
90058_6w_G2_D.tif	0.321793	-0.0192638	-0.256679	-0.165902	-0.268155	0.184142	0.224245	-0.130078	0.22062	0.115662	0.125937	-0.189174	0.118753	0.173852	0.0245526	-0.221133	0.0171659	0.219787	-0.076641	-0.249052	-0.0856821	0.258062	-0.178088	-0.277036	-0.187822	0.300135
90064_6w_G2_D.tif	0.307404	-0.0191491	-0.248242	-0.182638	-0.249476	0.196148	0.211328	-0.131156	0.218237	0.132356	0.115476	-0.187387	0.121394	0.190951	0.018869	-0.227934	0.0210145	0.226966	-0.0803396	-0.257344	-0.0778887	0.262389	-0.177974	-0.294217	-0.179802	0.291015
90068_6w_G2_D.tif	0.321467	-0.0114211	-0.262145	-0.187897	-0.262134	0.161001	0.217263	-0.121772	0.228695	0.128956	0.1155	-0.177778	0.128257	0.182379	0.0141474	-0.2179	0.0274177	0.223167	-0.0884125	-0.24894	-0.073289	0.260726	-0.190718	-0.283051	-0.176049	0.292531
90071_6w_G2_D.tif	0.337088	-0.0151963	-0.277952	-0.139263	-0.279254	0.14491	0.231081	-0.129448	0.237578	0.131903	0.123633	-0.174884	0.129352	0.175067	0.0188474	-0.214214	0.0247575	0.217226	-0.0861868	-0.245314	-0.0808955	0.248496	-0.191114	-0.279149	-0.186934	0.279867
90073_6w_G2_D.tif	0.297841	-0.0201442	-0.254489	-0.154031	-0.258178	0.113504	0.20258	-0.144615	0.211912	0.142524	0.108167	-0.197577	0.120633	0.207559	0.0145928	-0.232516	0.0279365	0.250511	-0.0772372	-0.266952	-0.0650953	0.284599	-0.170104	-0.301651	-0.158558	0.318791
90075_6w_G2_D.tif	0.31445	-0.0256083	-0.254492	-0.172937	-0.25871	0.180714	0.213008	-0.128549	0.224708	0.131822	0.113792	-0.178359	0.124179	0.188047	0.0160151	-0.218231	0.0240747	0.229777	-0.0807765	-0.257834	-0.0785086	0.258087	-0.178086	-0.297573	-0.179653	0.290645
90079_6w_G2_D.tif	0.323603	-0.0103188	-0.262202	-0.187374	-0.255965	0.189277	0.21732	-0.11096	0.228656	0.123458	0.115928	-0.171664	0.127686	0.178371	0.0143389	-0.216415	0.024559	0.214607	-0.0878944	-0.254956	-0.0762735	0.253282	-0.190383	-0.293575	-0.179372	0.286269
90081_6w_G2_D.tif	0.310308	-0.0122013	-0.252511	-0.16917	-0.25127	0.196311	0.216163	-0.133188	0.21464	0.128032	0.11865	-0.189021	0.116516	0.183282	0.0201504	-0.226255	0.0184164	0.224201	-0.0772495	-0.263167	-0.079599	0.260316	-0.17606	-0.295769	-0.178152	0.29663
90083_6w_G2_D.tif	0.290651	-0.0166515	-0.231939	-0.19743	-0.233659	0.208202	0.200132	-0.137189	0.204212	0.134844	0.108483	-0.194241	0.111132	0.192364	0.0155314	-0.231836	0.0190081	0.2373	-0.0749155	-0.272449	-0.0741768	0.27465	-0.166884	-0.309655	-0.167576	0.312091
90087_6w_G2_D.tif	0.294294	-0.0186691	-0.24596	-0.172363	-0.247687	0.179669	0.2011	-0.130754	0.205805	0.128692	0.109104	-0.187943	0.116518	0.196949	0.0187997	-0.236197	0.0241346	0.241382	-0.0729456	-0.276523	-0.0692712	0.277873	-0.167828	-0.309457	-0.166063	0.307341
90090_6w_G2_D.tif	0.345007	-0.011791	-0.278124	-0.175123	-0.279188	0.163459	0.234529	-0.111021	0.241167	0.112177	0.126234	-0.1662	0.133595	0.165848	0.0178564	-0.205109	0.0260493	0.208937	-0.0912968	-0.236082	-0.0833532	0.241992	-0.200719	-0.267126	-0.191756	0.280039
90093_6w_G2_D.tif	0.301858	-0.0254309	-0.246692	-0.150677	-0.258057	0.185604	0.21166	-0.140389	0.206629	0.122855	0.119715	-0.198294	0.112343	0.189011	0.0244207	-0.228373	0.017198	0.236284	-0.0683362	-0.26732	-0.0789807	0.27437	-0.162927	-0.301948	-0.178829	0.304307
90100_6w_G2_D.tif	0.322742	-0.00954477	-0.265424	-0.158459	-0.26011	0.192034	0.225354	-0.126692	0.222777	0.122628	0.124075	-0.182031	0.122763	0.179754	0.02282	-0.225399	0.0212228	0.219399	-0.0815913	-0.254629	-0.0818389	0.250569	-0.185902	-0.286044	-0.186888	0.278414
90108_6w_G2_D.tif	0.335087	-0.0118974	-0.270572	-0.154301	-0.272599	0.178003	0.235429	-0.135285	0.231039	0.122833	0.129143	-0.182709	0.125233	0.175231	0.021896	-0.211049	0.0179571	0.209239	-0.0835485	-0.241804	-0.0877774	0.242758	-0.188989	-0.272559	-0.192299	0.281542
90113_6w_G2_D.tif	0.320379	-0.0137847	-0.261371	-0.182688	-0.259469	0.175401	0.218787	-0.126703	0.22954	0.133837	0.117535	-0.181241	0.129762	0.189282	0.0155814	-0.219096	0.0266282	0.22324	-0.0878019	-0.248929	-0.0771733	0.251769	-0.191005	-0.28152	-0.181393	0.280434
90116_6w_G2_D.tif	0.306907	-0.0168828	-0.249576	-0.161796	-0.252098	0.200903	0.21753	-0.141409	0.211085	0.126896	0.123029	-0.19935	0.115877	0.1897	0.0238699	-0.228006	0.0171279	0.229364	-0.0740646	-0.2597	-0.0835816	0.259293	-0.172391	-0.291499	-0.183715	0.292488
90118_6w_G2_D.tif	0.306128	-0.012393	-0.249749	-0.194229	-0.243993	0.18339	0.205604	-0.127763	0.22221	0.143938	0.107387	-0.183103	0.125097	0.195698	0.0095208	-0.222528	0.0261782	0.228585	-0.0868526	-0.26144	-0.070981	0.260817	-0.182413	-0.304018	-0.168136	0.293047
90119_6w_G2_D.tif	0.311425	-0.0113881	-0.252649	-0.184355	-0.249354	0.196223	0.213916	-0.124839	0.218109	0.127124	0.116462	-0.184229	0.121817	0.186721	0.0183209	-0.227214	0.0214214	0.222598	-0.0823254	-0.258524	-0.0777344	0.258002	-0.182055	-0.293698	-0.177354	0.293578
90121_6w_G2_D.tif	0.309652	-0.0247512	-0.249636	-0.173149	-0.258425	0.174585	0.213168	-0.141655	0.220371	0.136826	0.114371	-0.186699	0.12107	0.192623	0.0177153	-0.223084	0.0203262	0.228684	-0.0785749	-0.255341	-0.0784233	0.264023	-0.174323	-0.291467	-0.177292	0.299404
90126_6w_G2_D.tif	0.308747	-0.0175044	-0.250762	-0.169448	-0.255405	0.184629	0.212223	-0.131244	0.215411	0.12828	0.116219	-0.189014	0.117666	0.185694	0.0194952	-0.227305	0.0193731	0.226645	-0.0766139	-0.262141	-0.078225	0.264007	-0.172972	-0.297048	-0.175158	0.304449
90129_6w_G2_D.tif	0.308642	-0.0254994	-0.247489	-0.150429	-0.261482	0.19474	0.216279	-0.138593	0.212907	0.124471	0.122685	-0.196909	0.113102	0.181801	0.0266403	-0.230448	0.0140566	0.225963	-0.0686151	-0.263783	-0.0847929	0.265759	-0.166107	-0.289213	-0.185825	0.302141
90134_6w_G2_D.tif	0.311605	-0.0135614	-0.256028	-0.174506	-0.253575	0.185956	0.212307	-0.121014	0.216567	0.122064	0.11479	-0.179963	0.1212	0.185531	0.0174433	-0.224165	0.0228098	0.226016	-0.0794399	-0.265801	-0.0754251	0.261818	-0.178473	-0.301223	-0.173783	0.298847
90135_6w_G2_D.tif	0.319534	-0.0200417	-0.256204	-0.173947	-0.261645	0.18883	0.221523	-0.130438	0.222318	0.121305	0.122057	-0.184292	0.12187	0.180551	0.0204053	-0.216601	0.0206129	0.224075	-0.0797253	-0.251656	-0.0832423	0.255734	-0.181059	-0.283876	-0.186444	0.290356
90151_6w_G2_D.tif	0.312359	-0.0114202	-0.256861	-0.174049	-0.260325	0.155546	0.21598	-0.137141	0.218129	0.13045	0.11613	-0.188714	0.121212	0.188617	0.016948	-0.223753	0.0227339	0.227759	-0.0812256	-0.255229	-0.0743465	0.26647	-0.179775	-0.286815	-0.170958	0.308279
90152_6w_G2_D.tif	0.32991	-0.0177737	-0.268603	-0.162229	-0.272577	0.162548	0.228505	-0.130865	0.229433	0.120712	0.124196	-0.179382	0.127394	0.181879	0.0198011	-0.21256	0.0227967	0.220489	-0.0844812	-0.24187	-0.0823215	0.251481	-0.187451	-0.278533	-0.186603	0.286106
90153_6w_G2_D.tif	0.322466	-0.0100962	-0.264261	-0.16247	-0.259373	0.187412	0.226111	-0.13222	0.221068	0.121709	0.123293	-0.182227	0.122038	0.182398	0.0197498	-0.216022	0.0199447	0.21933	-0.0820245	-0.253448	-0.0815639	0.251926	-0.184026	-0.290934	-0.183424	0.284642
90155_6w_G2_D.tif	0.290086	-0.0167573	-0.241972	-0.166639	-0.246125	0.183561	0.201406	-0.141571	0.204897	0.139216	0.112162	-0.202796	0.113832	0.198731	0.0206529	-0.240853	0.0221821	0.242651	-0.071055	-0.274976	-0.0720002	0.275742	-0.165689	-0.302058	-0.168376	0.305749
90162_6w_G2_D.tif	0.289335	-0.0160315	-0.243432	-0.162989	-0.24583	0.177351	0.200845	-0.143298	0.204347	0.141451	0.110452	-0.200758	0.114499	0.20286	0.0210564	-0.246154	0.0227973	0.244215	-0.0723706	-0.273191	-0.070804	0.275467	-0.165367	-0.305051	-0.165529	0.306127
90164_6w_G2_D.tif	0.323203	-0.0140258	-0.26592	-0.177143	-0.262675	0.166562	0.2181	-0.120048	0.230889	0.130284	0.115871	-0.175229	0.130519	0.186271	0.013935	-0.215616	0.0278771	0.222459	-0.0876984	-0.252973	-0.0748878	0.253753	-0.190671	-0.287764	-0.178542	0.283469
90170_6w_G2_D.tif	0.309747	-0.0165799	-0.249454	-0.186983	-0.252167	0.187117	0.214404	-0.133369	0.216048	0.12641	0.116233	-0.185406	0.119335	0.186406	0.0186605	-0.224945	0.021668	0.229933	-0.0814283	-0.252974	-0.0770754	0.265454	-0.178649	-0.292392	-0.177321	0.297331
90171_6w_G2_D.tif	0.326855	-0.0171982	-0.2688	-0.161974	-0.271483	0.154694	0.223428	-0.123726	0.227651	0.1189	0.119736	-0.172865	0.126358	0.178723	0.0187664	-0.216534	0.0250936	0.224124	-0.0833014	-0.250906	-0.077169	0.260214	-0.186031	-0.285441	-0.181103	0.291991
90179_6w_G2_D.tif	0.313365	-0.014956	-0.250075	-0.182513	-0.253791	0.197893	0.21888	-0.130932	0.21387	0.117601	0.120502	-0.185017	0.116332	0.17892	0.0223278	-0.225762	0.0177457	0.223858	-0.0784824	-0.254042	-0.0816109	0.26238	-0.177716	-0.288474	-0.181348	0.301044
90181_6w_G2_D.tif	0.340622	-0.021254	-0.269604	-0.17632	-0.274708	0.187102	0.233749	-0.116177	0.236637	0.109611	0.127197	-0.166421	0.129315	0.166541	0.0211266	-0.206048	0.0216817	0.210172	-0.0862236	-0.238135	-0.0879776	0.243771	-0.193897	-0.270306	-0.197917	0.277464
90182_6w_G2_D.tif	0.28305	-0.0193729	-0.231844	-0.162583	-0.239246	0.207026	0.202042	-0.152713	0.194783	0.135977	0.114845	-0.209787	0.104767	0.197066	0.0253958	-0.245249	0.0147971	0.24289	-0.0633772	-0.280445	-0.0776626	0.278487	-0.155867	-0.304564	-0.171682	0.313267
90185_6w_G2_D.tif	0.31038	-0.0161852	-0.253162	-0.132972	-0.255484	0.204798	0.220716	-0.140366	0.209002	0.123541	0.125452	-0.19851	0.110978	0.182931	0.0272042	-0.230465	0.0124071	0.22397	-0.0697042	-0.266558	-0.0854466	0.26008	-0.166843	-0.302703	-0.185499	0.292439
90186_6w_G2_D.tif	0.320904	-0.0170932	-0.256001	-0.192502	-0.254877	0.197382	0.21939	-0.121398	0.226721	0.12304	0.118772	-0.176585	0.127007	0.182754	0.0169429	-0.215863	0.0236297	0.220745	-0.0862883	-0.249059	-0.0807209	0.252503	-0.189092	-0.285377	-0.186387	0.281454
90196_6w_G2_D.tif	0.324408	-0.00975026	-0.266177	-0.177964	-0.25944	0.18055	0.221892	-0.120522	0.228461	0.125799	0.119165	-0.176022	0.128109	0.181941	0.016063	-0.216258	0.0258876	0.220038	-0.0879523	-0.250609	-0.0768813	0.252095	-0.191688	-0.287952	-0.181847	0.278655
90203_6w_G2_D.tif	0.305768	-0.0140722	-0.255352	-0.179205	-0.258033	0.139989	0.204629	-0.127943	0.219989	0.139176	0.109702	-0.190609	0.123662	0.191082	0.0135845	-0.229075	0.0294583	0.238823	-0.0826606	-0.260563	-0.066381	0.276617	-0.179887	-0.292346	-0.164479	0.308128
90205_6w_G2_D.tif	0.29456	-0.0202863	-0.236233	-0.200819	-0.242597	0.193991	0.200898	-0.131873	0.209086	0.130377	0.109683	-0.191026	0.118164	0.195652	0.0174639	-0.233372	0.0240885	0.240345	-0.0779158	-0.264	-0.0733131	0.273305	-0.172786	-0.298711	-0.171098	0.306417
90207_6w_G2_D.tif	0.313928	-0.0122939	-0.259349	-0.164908	-0.260341	0.172976	0.217987	-0.131211	0.217558	0.124517	0.120233	-0.189355	0.120572	0.18456	0.0204736	-0.225086	0.0229733	0.229411	-0.0793859	-0.257013	-0.0766773	0.263403	-0.179908	-0.289119	-0.178064	0.294119
90215_6w_G2_D.tif	0.313406	-0.0147883	-0.256489	-0.156753	-0.255725	0.196906	0.218793	-0.126953	0.211012	0.11438	0.120908	-0.181949	0.113932	0.176967	0.0240554	-0.227744	0.0176325	0.225429	-0.0742827	-0.26501	-0.0796642	0.265063	-0.173062	-0.302388	-0.180517	0.296841
90220_6w_G2_D.tif	0.284656	-0.0155919	-0.231241	-0.20119	-0.232692	0.201992	0.1935	-0.132159	0.203255	0.137295	0.105592	-0.195377	0.114261	0.198387	0.0163583	-0.240214	0.0230806	0.241417	-0.0749884	-0.276432	-0.068691	0.279934	-0.168625	-0.30883	-0.164465	0.310769
90224_6w_G2_D.tif	0.31187	-0.0210665	-0.251215	-0.148016	-0.257009	0.20369	0.222037	-0.143921	0.211218	0.121638	0.125199	-0.194663	0.113041	0.183611	0.0258369	-0.222877	0.0135132	0.225861	-0.0705028	-0.262397	-0.0873051	0.258558	-0.168874	-0.294033	-0.187811	0.293616
90226_6w_G2-D.tif	0.316651	-0.0132935	-0.259228	-0.163297	-0.25781	0.183984	0.219324	-0.132471	0.221192	0.13008	0.118788	-0.184117	0.122036	0.186535	0.0190062	-0.223128	0.0205832	0.221745	-0.0803362	-0.258912	-0.0801589	0.253556	-0.180596	-0.291836	-0.179452	0.291155
90236_6w_G2_D.tif	0.31341	-0.0156006	-0.256362	-0.175897	-0.255477	0.181502	0.215779	-0.132124	0.221897	0.132289	0.116837	-0.185794	0.123637	0.188678	0.0164283	-0.219924	0.0253541	0.231661	-0.0823337	-0.256899	-0.0776579	0.256207	-0.182523	-0.290957	-0.178988	0.286858
90241_6w_G2_D.tif	0.3209	-0.0168628	-0.261248	-0.168166	-0.265772	0.171657	0.2213	-0.128146	0.223488	0.121999	0.12155	-0.184778	0.123857	0.182528	0.0198926	-0.218896	0.0221452	0.223244	-0.0814343	-0.250047	-0.0798649	0.258201	-0.182548	-0.284018	-0.182266	0.293285
90248_6w_G2_D.tif	0.309425	-0.0203531	-0.251182	-0.183817	-0.256279	0.175832	0.208847	-0.125933	0.221306	0.13156	0.11348	-0.186742	0.12433	0.191009	0.0154461	-0.222466	0.024675	0.229686	-0.0814069	-0.257828	-0.0749387	0.264002	-0.178867	-0.293369	-0.174834	0.298416
90253_6w_G2_D.tif	0.3307	-0.0141867	-0.271987	-0.182422	-0.266873	0.156288	0.22145	-0.116207	0.23764	0.129466	0.115866	-0.168532	0.135148	0.184197	0.0109908	-0.207389	0.0312033	0.221892	-0.0928939	-0.24596	-0.0737453	0.251155	-0.197504	-0.284735	-0.179995	0.276435
90256_6w_G2_D.tif	0.314416	-0.0162318	-0.252975	-0.179913	-0.255214	0.183234	0.215588	-0.132461	0.221533	0.131936	0.114551	-0.180683	0.121279	0.185216	0.0171895	-0.224382	0.0212617	0.224479	-0.082183	-0.254953	-0.0791529	0.256922	-0.179807	-0.291869	-0.176485	0.298705
90260_6w_G2_D.tif	0.289799	-0.00202977	-0.242308	-0.185274	-0.232468	0.204565	0.204786	-0.134502	0.196072	0.127354	0.113693	-0.197705	0.109232	0.191895	0.0206321	-0.241229	0.0199314	0.236862	-0.0747837	-0.275426	-0.0698641	0.276875	-0.170728	-0.309815	-0.163994	0.308431
90263_6w_G2_D.tif	0.304941	-0.0213919	-0.244884	-0.164246	-0.253106	0.201677	0.213855	-0.136415	0.207553	0.120648	0.120165	-0.193429	0.111472	0.183387	0.025435	-0.232683	0.0143533	0.228031	-0.0706057	-0.263282	-0.0825182	0.267943	-0.166191	-0.296894	-0.18047	0.306655
90271_6w_G2_D.tif	0.297643	-0.0223478	-0.243003	-0.179923	-0.252695	0.165552	0.201873	-0.139603	0.214568	0.142613	0.108689	-0.195129	0.119568	0.198886	0.0154504	-0.231658	0.0243542	0.240153	-0.0770211	-0.264147	-0.0727069	0.270808	-0.170051	-0.296805	-0.166669	0.3116
90272_6w_G2_D.tif	0.308651	-0.0176434	-0.257577	-0.152537	-0.261219	0.163532	0.212121	-0.135238	0.220179	0.139816	0.116246	-0.192646	0.123087	0.195562	0.0210323	-0.237022	0.0236053	0.230315	-0.0780884	-0.260994	-0.0746815	0.264659	-0.177072	-0.289199	-0.176285	0.291395
90274_6w_G2_D.tif	0.271309	-0.00835754	-0.229952	-0.212394	-0.224505	0.161032	0.17851	-0.141249	0.207465	0.172133	0.0902805	-0.201729	0.122336	0.223862	0.00351379	-0.245892	0.0349406	0.25735	-0.0837778	-0.282509	-0.0549296	0.280407	-0.173309	-0.316252	-0.141882	0.313598
90281_7w_G2_D.tif	0.29522	-0.0194705	-0.242695	-0.180941	-0.250036	0.162828	0.201566	-0.141402	0.209523	0.139313	0.106812	-0.190965	0.116336	0.197807	0.0161541	-0.234885	0.0227276	0.239288	-0.0761655	-0.266552	-0.0690518	0.2801	-0.167996	-0.302312	-0.162394	0.317192
90287_6w_G2_D.tif	0.296312	-0.0146467	-0.2455	-0.160289	-0.245372	0.194847	0.206424	-0.138856	0.207273	0.137375	0.115097	-0.200388	0.113151	0.193681	0.0219094	-0.240227	0.0190628	0.234918	-0.0731839	-0.269513	-0.075756	0.268938	-0.16696	-0.305799	-0.172456	0.29996
90293_6w_G2-D.tif	0.316021	-0.0167948	-0.258053	-0.154421	-0.260621	0.187333	0.219082	-0.130192	0.219532	0.126313	0.121496	-0.188968	0.119863	0.183497	0.0221083	-0.22565	0.0187293	0.221864	-0.0770817	-0.259061	-0.0817384	0.256765	-0.17658	-0.292548	-0.182757	0.291862
90302_6w_G2_D.tif	0.278427	-0.0231567	-0.22837	-0.180738	-0.241422	0.185135	0.19161	-0.14538	0.197765	0.14015	0.10584	-0.204394	0.110023	0.203879	0.0207952	-0.248653	0.0206353	0.248765	-0.0668497	-0.279413	-0.0706948	0.284738	-0.156586	-0.306098	-0.161173	0.325165
90308_6w_G2_D.tif	0.333214	-0.0220609	-0.26459	-0.172399	-0.271414	0.191249	0.228697	-0.116935	0.232125	0.112631	0.126741	-0.175357	0.126923	0.170406	0.02247	-0.212335	0.0202048	0.211924	-0.0825512	-0.243996	-0.0872182	0.248093	-0.188603	-0.273164	-0.195997	0.281943
90309_6w_G2_D.tif	0.310927	-0.0165825	-0.254769	-0.1543	-0.260285	0.18172	0.216486	-0.132927	0.213036	0.121943	0.11949	-0.187403	0.116321	0.183689	0.0240044	-0.232553	0.0187459	0.227783	-0.073446	-0.264834	-0.080034	0.263334	-0.172271	-0.29301	-0.178205	0.303142
90327_6w_G2_D.tif	0.303017	-0.00294185	-0.258134	-0.165912	-0.249443	0.170618	0.206915	-0.127799	0.21679	0.143485	0.113137	-0.19596	0.122985	0.196293	0.016424	-0.237075	0.0266528	0.229907	-0.0811593	-0.270471	-0.0689548	0.263259	-0.181483	-0.296726	-0.166747	0.293322
90331_6w_G2_D.tif	0.324462	-0.0112078	-0.267194	-0.169819	-0.265453	0.165315	0.220105	-0.118348	0.228357	0.124436	0.118592	-0.177747	0.12805	0.181857	0.0168975	-0.219589	0.02551	0.219348	-0.0856357	-0.252858	-0.076655	0.25378	-0.188532	-0.286224	-0.178502	0.291057
90339_6w_G2_D.tif	0.320507	-0.0184012	-0.258531	-0.181457	-0.259799	0.185974	0.217774	-0.120392	0.226717	0.124401	0.118226	-0.178173	0.126003	0.181607	0.017599	-0.218222	0.0235427	0.221089	-0.0841726	-0.251379	-0.078724	0.256833	-0.185566	-0.288036	-0.183575	0.286158
90340_6w_G2_D.tif	0.301471	-0.0184848	-0.252616	-0.173948	-0.254149	0.153842	0.203996	-0.134124	0.2165	0.140273	0.108503	-0.188004	0.122755	0.199463	0.0153969	-0.232992	0.0284427	0.242442	-0.080764	-0.262623	-0.0677774	0.273782	-0.175865	-0.30005	-0.165893	0.300423
90344_6w_G2_D.tif	0.310764	-0.0189414	-0.248518	-0.176237	-0.254952	0.192388	0.216003	-0.136271	0.216512	0.127728	0.118909	-0.190378	0.117631	0.184824	0.0204926	-0.224549	0.0176078	0.224677	-0.0774495	-0.255676	-0.0817366	0.261323	-0.174842	-0.289545	-0.180421	0.300658
90354_6w_G2_D.tif	0.305828	-0.0261618	-0.24492	-0.184376	-0.255316	0.184217	0.209245	-0.134957	0.218133	0.131451	0.113383	-0.18582	0.12122	0.191782	0.0186794	-0.226197	0.0217289	0.231485	-0.0771247	-0.259369	-0.0776121	0.2673	-0.174632	-0.289283	-0.178613	0.29993
90355_6w_G2_D.tif	0.316359	-0.0166883	-0.254933	-0.176757	-0.257837	0.190949	0.2205	-0.131847	0.219284	0.122173	0.120876	-0.183528	0.121231	0.183693	0.0214184	-0.222866	0.019428	0.221727	-0.0797576	-0.253474	-0.0810839	0.259285	-0.181389	-0.28421	-0.184097	0.291544
90356_6w_G2_D.tif	0.33381	-0.024324	-0.269675	-0.165949	-0.275145	0.166839	0.225954	-0.118701	0.237727	0.123831	0.12273	-0.1752	0.132537	0.180622	0.018064	-0.210602	0.0252513	0.217682	-0.087022	-0.239977	-0.0835785	0.244647	-0.190497	-0.278154	-0.190156	0.279286
90372_6w_G2_D.tif	0.299815	-0.0131887	-0.251491	-0.147528	-0.251924	0.180431	0.206765	-0.134676	0.211246	0.139462	0.114366	-0.197714	0.116289	0.193973	0.0218439	-0.243666	0.0216274	0.234495	-0.0734663	-0.27328	-0.074768	0.265275	-0.169283	-0.303024	-0.17102	0.29944
90374_6w_G2_D.tif	0.298878	-0.0174799	-0.248343	-0.186193	-0.252847	0.158422	0.200935	-0.129229	0.215235	0.136277	0.108835	-0.192252	0.123713	0.199836	0.0144165	-0.230888	0.0293931	0.242924	-0.0797766	-0.265848	-0.0681489	0.272847	-0.176966	-0.294605	-0.165325	0.30619
90393_6w_G2_D.tif	0.2913	-0.0146086	-0.23757	-0.197357	-0.236438	0.193355	0.196545	-0.131887	0.212058	0.14541	0.106454	-0.195896	0.11937	0.200382	0.0133057	-0.235317	0.0247904	0.237688	-0.0809364	-0.267787	-0.0696697	0.271245	-0.173556	-0.306982	-0.165652	0.301755
90394_6w_G2_D.tif	0.286231	-0.0214125	-0.232952	-0.173905	-0.238434	0.201547	0.199048	-0.146854	0.203315	0.143104	0.109865	-0.20264	0.109718	0.197986	0.020392	-0.241973	0.0188355	0.243406	-0.0702429	-0.273427	-0.0758835	0.274256	-0.160294	-0.308797	-0.169599	0.30871
90399_6w_G2_D.tif	0.323671	-0.0166648	-0.254308	-0.202851	-0.258354	0.189106	0.219241	-0.119834	0.230239	0.12347	0.118153	-0.176935	0.128295	0.179132	0.0142819	-0.211133	0.0246785	0.219478	-0.088585	-0.245003	-0.0805178	0.252433	-0.191789	-0.278982	-0.185005	0.287785
90411_6w_G2_D.tif	0.308431	-0.0178985	-0.251333	-0.158846	-0.259382	0.178469	0.214724	-0.137753	0.212259	0.12563	0.117953	-0.189902	0.114695	0.183795	0.022378	-0.229641	0.0181557	0.22932	-0.0727292	-0.265231	-0.0791844	0.266964	-0.170058	-0.293369	-0.175909	0.308461
90413_6w_G2_D.tif	0.322381	-0.0128117	-0.268534	-0.170224	-0.266052	0.146871	0.220394	-0.127813	0.227127	0.126909	0.117042	-0.177511	0.129065	0.189532	0.0153323	-0.216903	0.0277958	0.22711	-0.0869074	-0.249874	-0.0729168	0.261288	-0.189112	-0.286112	-0.175616	0.289538
90416_6w_G2_D.tif	0.310536	-0.0132304	-0.249136	-0.184935	-0.244836	0.211168	0.214822	-0.125345	0.213637	0.120992	0.116957	-0.181293	0.11712	0.181523	0.0194113	-0.225171	0.019084	0.224304	-0.0790363	-0.263352	-0.0805613	0.258565	-0.178427	-0.298846	-0.17957	0.29562
90419_6w_G2_D.tif	0.314656	-0.0146657	-0.252096	-0.188668	-0.251767	0.19267	0.21805	-0.133195	0.221115	0.129395	0.117275	-0.182888	0.122246	0.185925	0.0166667	-0.219038	0.0215069	0.224165	-0.0837646	-0.252433	-0.0794767	0.257071	-0.183759	-0.288387	-0.180653	0.290048
90424_6w_G2_D.tif	0.286636	-0.0190988	-0.227993	-0.195264	-0.230808	0.217578	0.200712	-0.143541	0.202954	0.138382	0.112185	-0.202925	0.110788	0.196657	0.0200236	-0.238939	0.0174862	0.238923	-0.0740746	-0.267422	-0.077442	0.273714	-0.166192	-0.303367	-0.174276	0.305303
90433_6w_G2_D.tif	0.300725	-0.0138596	-0.246997	-0.182905	-0.248804	0.171941	0.208619	-0.143672	0.213486	0.141168	0.111481	-0.192951	0.119706	0.199178	0.0165208	-0.232373	0.0232909	0.235551	-0.0807971	-0.258887	-0.0729721	0.267355	-0.17605	-0.293837	-0.168208	0.303293
90434_6w_G2_D.tif	0.304884	-0.0192711	-0.241223	-0.192368	-0.245291	0.208061	0.21089	-0.132022	0.213463	0.126376	0.115686	-0.187584	0.117593	0.187192	0.0196505	-0.227428	0.0183902	0.22695	-0.0774319	-0.261221	-0.0806839	0.263434	-0.175725	-0.29222	-0.180202	0.300102
90436_6w_G2_D.tif	0.309302	-0.0267861	-0.246343	-0.182231	-0.260161	0.175484	0.211314	-0.135483	0.219521	0.129997	0.115381	-0.189452	0.12087	0.189231	0.0179995	-0.221576	0.0205655	0.229566	-0.0779513	-0.253278	-0.0790959	0.266413	-0.173555	-0.288056	-0.177847	0.306173
90437_6w_G2_D.tif	0.304964	-0.0110691	-0.25188	-0.176863	-0.247172	0.185009	0.20989	-0.132852	0.214578	0.135109	0.11217	-0.185981	0.119735	0.192736	0.0166903	-0.230682	0.0233101	0.231343	-0.0807214	-0.264417	-0.0738779	0.262396	-0.17744	-0.301788	-0.170246	0.297057
90439_6w_G2_D.tif	0.306092	-0.0222376	-0.246707	-0.171683	-0.252413	0.191337	0.213672	-0.142733	0.214334	0.132121	0.117664	-0.193995	0.116952	0.190894	0.0196381	-0.223656	0.019506	0.23395	-0.0765939	-0.256486	-0.0812077	0.262085	-0.171383	-0.296285	-0.179553	0.29669
90440_6w_G2_D.tif	0.298847	-0.0171612	-0.245035	-0.176803	-0.24906	0.184764	0.207125	-0.13871	0.211057	0.135601	0.114081	-0.196067	0.117348	0.194961	0.0195347	-0.233504	0.0213854	0.234684	-0.0759406	-0.264431	-0.0743374	0.270891	-0.17214	-0.295576	-0.172866	0.30135
90443_6w_G2_D.tif	0.347837	-0.0212246	-0.276921	-0.164711	-0.281622	0.177428	0.238256	-0.113297	0.240649	0.107197	0.129571	-0.164224	0.131853	0.166184	0.0211839	-0.202398	0.0202616	0.202525	-0.0881219	-0.232073	-0.0894612	0.238983	-0.195069	-0.27236	-0.198416	0.27797
90447_6w_G2_D.tif	0.306073	-0.015827	-0.248298	-0.191029	-0.252475	0.169503	0.207233	-0.13179	0.218453	0.135576	0.108688	-0.18228	0.1219	0.190771	0.0142858	-0.227547	0.0255166	0.233123	-0.0816429	-0.261797	-0.0721932	0.267116	-0.179129	-0.292718	-0.168413	0.306898
90452_6w_G2_D.tif	0.297131	-0.0236537	-0.229774	-0.204128	-0.23676	0.218901	0.206451	-0.138918	0.209393	0.129949	0.112952	-0.190826	0.112966	0.187732	0.018662	-0.227866	0.0172898	0.233601	-0.0758172	-0.262548	-0.0805913	0.270654	-0.171184	-0.296172	-0.180718	0.303276
90458_6w_G2_D.tif	0.325867	-0.0174378	-0.256048	-0.184683	-0.260498	0.19921	0.224272	-0.124499	0.227583	0.120704	0.122222	-0.178303	0.12317	0.173563	0.0190974	-0.213733	0.0183656	0.212886	-0.0828128	-0.248812	-0.0860789	0.249338	-0.186089	-0.278948	-0.18905	0.290715
90459_6w_G2_D.tif	0.311112	-0.0130291	-0.257488	-0.163494	-0.254231	0.18077	0.213217	-0.1297	0.219679	0.134915	0.115656	-0.187909	0.122127	0.190729	0.016935	-0.225497	0.0225903	0.226044	-0.0805607	-0.262745	-0.0762504	0.257582	-0.178364	-0.300076	-0.174421	0.292409
90461_6w_G2_D.tif	0.291953	-0.0181397	-0.238152	-0.182723	-0.237916	0.203081	0.199059	-0.132638	0.207411	0.136752	0.108782	-0.194225	0.114762	0.195548	0.0166581	-0.2348	0.0227779	0.241034	-0.0744366	-0.275005	-0.0750479	0.267487	-0.167123	-0.311429	-0.168728	0.305058
90466_6w_G2_D.tif	0.302053	-0.0169649	-0.24686	-0.179915	-0.241539	0.200585	0.208348	-0.135226	0.214257	0.137289	0.111805	-0.186353	0.119415	0.196051	0.016684	-0.229009	0.0214264	0.231527	-0.0799886	-0.264148	-0.0758777	0.262624	-0.174966	-0.306738	-0.174757	0.290277
90468_6w_G2_D.tif	0.301027	-0.0185627	-0.240981	-0.202257	-0.244204	0.185746	0.199614	-0.126971	0.221372	0.144422	0.105058	-0.185262	0.123051	0.192898	0.0109357	-0.227518	0.0268383	0.234266	-0.0836162	-0.263576	-0.0711175	0.266952	-0.178743	-0.299834	-0.169235	0.299698
90469_6w_G2_D.tif	0.309895	-0.0225019	-0.246544	-0.171265	-0.254129	0.20014	0.215521	-0.137012	0.215362	0.126721	0.118558	-0.188115	0.114583	0.180842	0.0213206	-0.223267	0.0162354	0.225834	-0.0738595	-0.261839	-0.0830159	0.26306	-0.171279	-0.293034	-0.182648	0.300437
90470_6w_G2_D.tif	0.314229	-0.0295947	-0.245365	-0.179863	-0.259686	0.200151	0.218273	-0.135303	0.218877	0.12048	0.121462	-0.187125	0.117757	0.180417	0.0231125	-0.220282	0.0158547	0.224155	-0.0752748	-0.250263	-0.0866567	0.261538	-0.173233	-0.283302	-0.189348	0.298992
90472_6w_G2_D.tif	0.321162	-0.0272008	-0.256562	-0.1772	-0.262756	0.187321	0.217823	-0.122449	0.228028	0.123708	0.118683	-0.178111	0.126066	0.182864	0.0180994	-0.214706	0.0224335	0.223079	-0.0824932	-0.248406	-0.0821951	0.254851	-0.181483	-0.290366	-0.186805	0.286617
90486_6w_G2_D.tif	0.315736	-0.0144135	-0.259133	-0.164325	-0.255124	0.189893	0.219058	-0.132171	0.221144	0.130785	0.119248	-0.184451	0.121487	0.185413	0.0194448	-0.223463	0.0222898	0.22667	-0.081431	-0.25613	-0.0792725	0.255593	-0.18121	-0.295127	-0.182237	0.281725
90488_6w_G2_D.tif	0.320617	-0.0208213	-0.261657	-0.159758	-0.260257	0.191282	0.221232	-0.12744	0.225199	0.126191	0.121336	-0.181511	0.12467	0.185333	0.0196655	-0.216613	0.0217504	0.222923	-0.0811334	-0.254267	-0.0819085	0.252375	-0.18188	-0.294676	-0.187634	0.276982
90496_6w_G2_D.tif	0.32095	-0.0144825	-0.256531	-0.188891	-0.255965	0.193839	0.217595	-0.118218	0.226781	0.124407	0.117452	-0.177082	0.125737	0.179775	0.0160737	-0.217086	0.0223792	0.216618	-0.0850737	-0.253812	-0.0798002	0.253032	-0.187292	-0.28766	-0.182305	0.289562
90513_6w_G2_D.tif	0.287783	-0.0156975	-0.23187	-0.198365	-0.231143	0.20686	0.200301	-0.143358	0.206089	0.143624	0.108981	-0.198768	0.114323	0.200363	0.0159257	-0.235436	0.0205482	0.238864	-0.0775951	-0.268379	-0.0730701	0.273453	-0.170533	-0.304956	-0.169739	0.301797
90516_6w_G2_D.tif	0.320766	-0.0126922	-0.260817	-0.16531	-0.255639	0.201284	0.223845	-0.128232	0.222426	0.124873	0.123981	-0.185691	0.121848	0.181102	0.0215423	-0.221768	0.0196278	0.21927	-0.08234	-0.250872	-0.0833986	0.250272	-0.183837	-0.290369	-0.188004	0.278131
90519_6w_G2_D.tif	0.32491	-0.00825197	-0.264129	-0.17726	-0.258313	0.182914	0.220906	-0.120505	0.228756	0.128859	0.116779	-0.173562	0.12523	0.176257	0.0146747	-0.216163	0.0235223	0.215579	-0.0867068	-0.255264	-0.0779298	0.250429	-0.188992	-0.291338	-0.178708	0.288306
90520_6w_G2_D.tif	0.311515	-0.0202019	-0.256562	-0.165331	-0.262285	0.158623	0.213915	-0.137074	0.220891	0.135227	0.11658	-0.191655	0.122648	0.192035	0.0177959	-0.223719	0.0239125	0.232696	-0.0806217	-0.252409	-0.0749419	0.26688	-0.177281	-0.291235	-0.175566	0.296165
90527_6w_G2_D.tif	0.300313	-0.0178429	-0.247242	-0.180747	-0.249748	0.177236	0.206403	-0.13778	0.214589	0.13872	0.111325	-0.190667	0.12023	0.196391	0.0166882	-0.229923	0.0245497	0.236792	-0.0783347	-0.264798	-0.0716851	0.271286	-0.175498	-0.295851	-0.171592	0.297183
90542_6w_G2_D.tif	0.302734	-0.0182786	-0.250253	-0.170673	-0.251274	0.179735	0.204999	-0.127692	0.215249	0.134684	0.110993	-0.187681	0.120173	0.193375	0.0173793	-0.232696	0.0239262	0.233834	-0.0779127	-0.267071	-0.0729365	0.267063	-0.172851	-0.305044	-0.170226	0.300445
90547_6w_G2_D.tif	0.322806	-0.0148882	-0.259285	-0.190498	-0.256963	0.185112	0.217503	-0.119783	0.231656	0.131652	0.115175	-0.174249	0.129227	0.183164	0.0130789	-0.214081	0.0248985	0.216866	-0.0886695	-0.250893	-0.0774779	0.251905	-0.190739	-0.287803	-0.181209	0.283497
90554_6w_G2_D.tif	0.307897	-0.0249644	-0.248788	-0.176303	-0.255549	0.185366	0.210084	-0.128375	0.215108	0.122945	0.114243	-0.182774	0.119219	0.188097	0.0188134	-0.223849	0.0213013	0.231954	-0.0767826	-0.260568	-0.0774299	0.2673	-0.171829	-0.301521	-0.176287	0.302694
90559_6w_G2_D.tif	0.297828	-0.023383	-0.241646	-0.167021	-0.248797	0.197454	0.207698	-0.140699	0.207564	0.130776	0.115152	-0.19449	0.113934	0.194101	0.0227989	-0.235371	0.0166171	0.232648	-0.0708916	-0.268086	-0.0788293	0.270395	-0.165096	-0.300943	-0.176332	0.304618
90577_6w_G2_D.tif	0.303985	-0.0186468	-0.249618	-0.147653	-0.257712	0.184819	0.216142	-0.147777	0.20825	0.128659	0.122522	-0.203532	0.113843	0.192463	0.0259874	-0.234027	0.0168675	0.234012	-0.070704	-0.261296	-0.0815697	0.266168	-0.167277	-0.291769	-0.180717	0.298581
90582_6w_G2_D.tif	0.317661	-0.028031	-0.244622	-0.183098	-0.254128	0.219691	0.220877	-0.130731	0.220845	0.118783	0.123652	-0.185649	0.117681	0.176614	0.0240999	-0.220716	0.0130781	0.217428	-0.0768539	-0.248233	-0.0917024	0.253445	-0.175754	-0.283108	-0.194834	0.293605
90616_6w_G2_D.tif	0.300417	-0.0205407	-0.244792	-0.171398	-0.251355	0.186129	0.207332	-0.138448	0.212804	0.136034	0.114515	-0.196572	0.117171	0.193571	0.0197143	-0.232091	0.0208232	0.234901	-0.0748653	-0.264223	-0.0771775	0.266998	-0.169985	-0.29651	-0.174602	0.302151
[truncated: 957 more rows]
